# Supplementary material
Source: PubMed Central journal article supplement (PMC3523718)

**AKAP13-PH (XM\_907140, XM\_133543)**

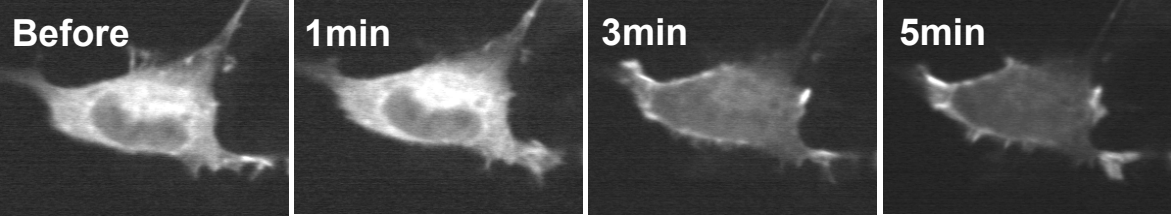

**AKT1-PH (NM\_009652)**

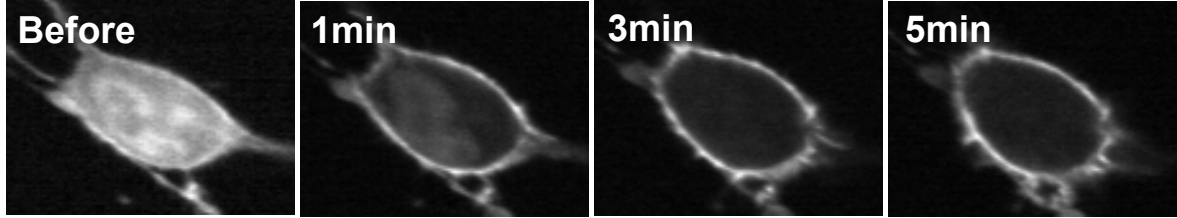

**AKT2-PH (NM\_007434)**

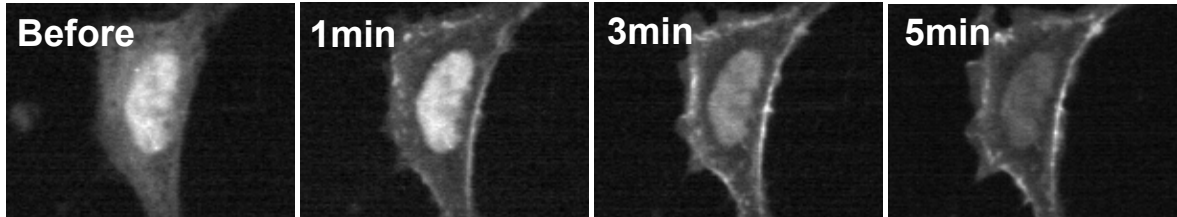

**AKT3-PH (NM\_011785)**

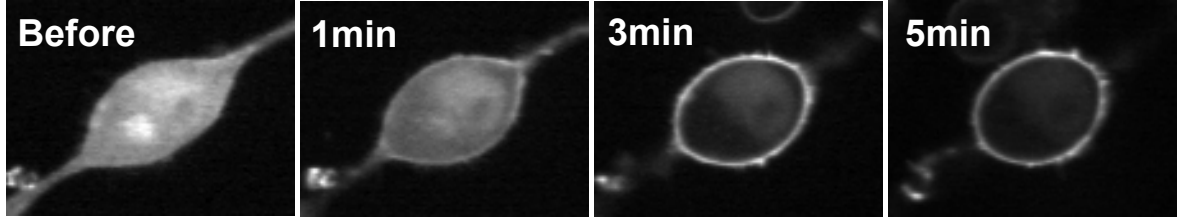

**BTK-PH (NM\_013482)**

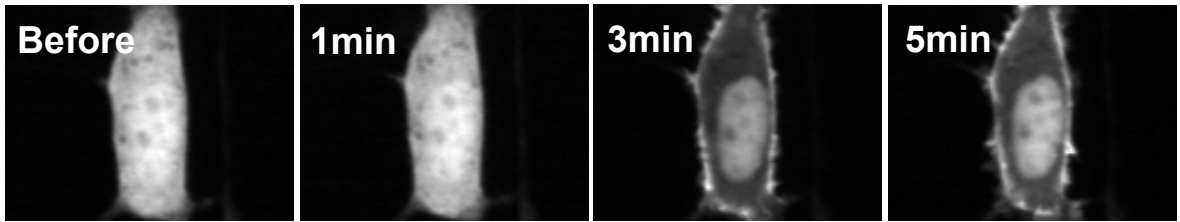

**CNKSR2-PH (NM\_177751)**

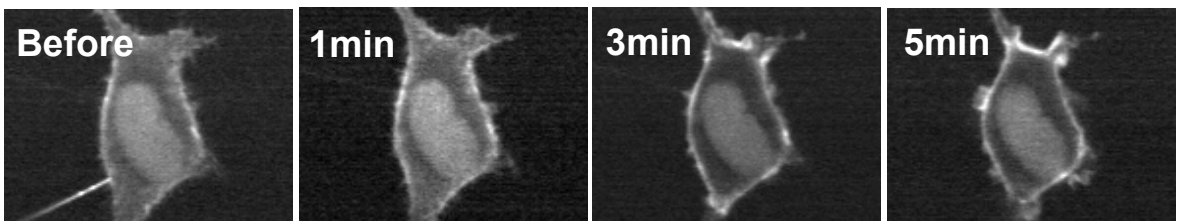

**DAPP1-PH (NM\_011932)**

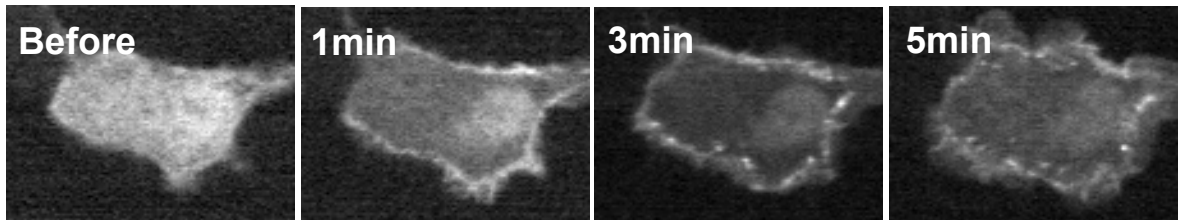

**FGD6-PH2 (NM\_053072)**

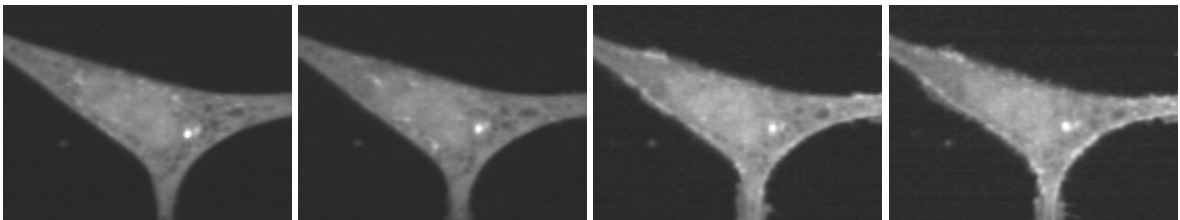

### FGD6-PHT (NM\_053072)

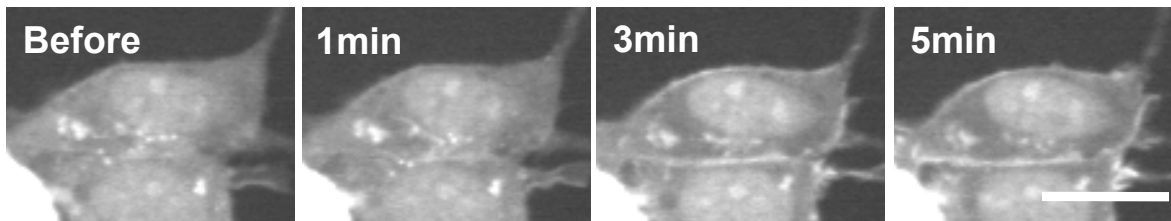

### GAB1-PH (NM\_021356)

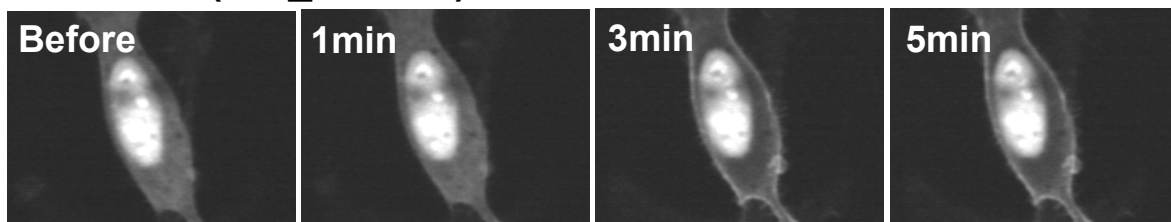

### GAB2-PH (NM\_010248)

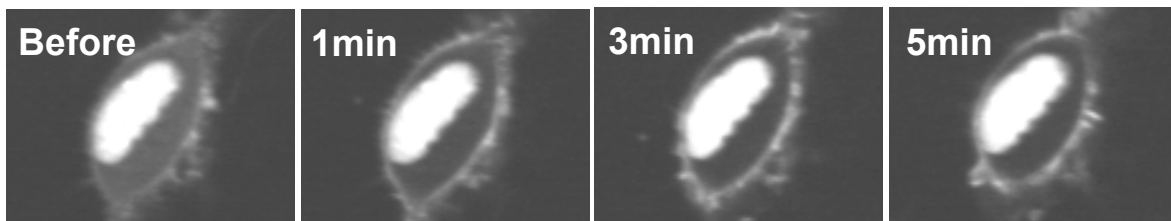

### ITK-PH (NM\_010583)

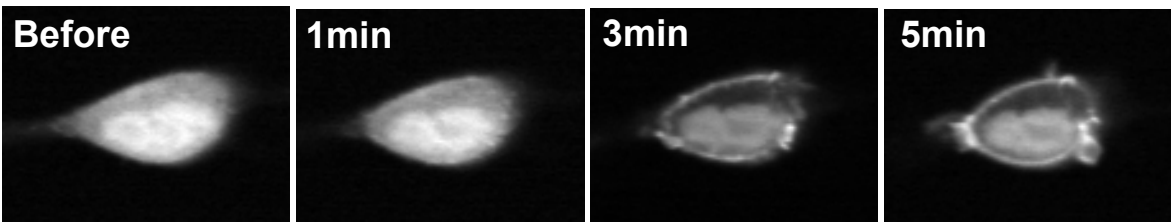

### Myo10-PH (NM\_019472)

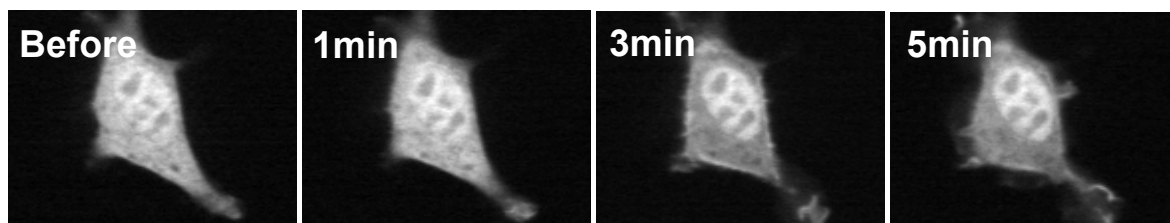

### Myo10-PHT (NM\_019472)

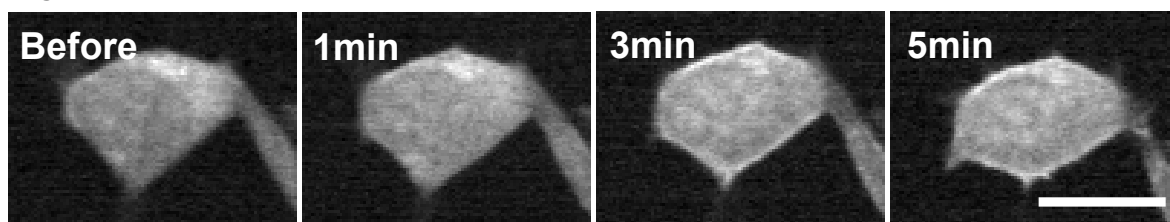

### OSBPL3-PH (NM\_027881)

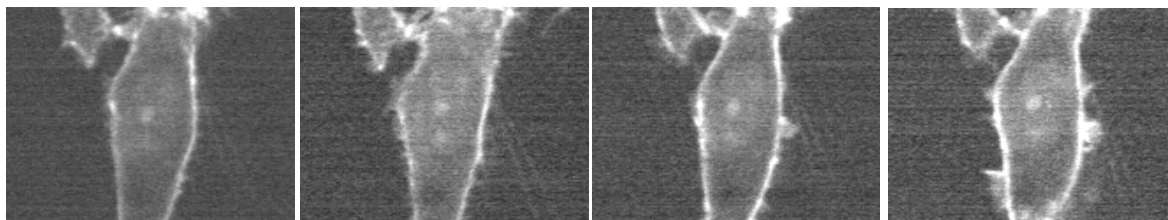

### OSBPL7-PH (XM\_193637)

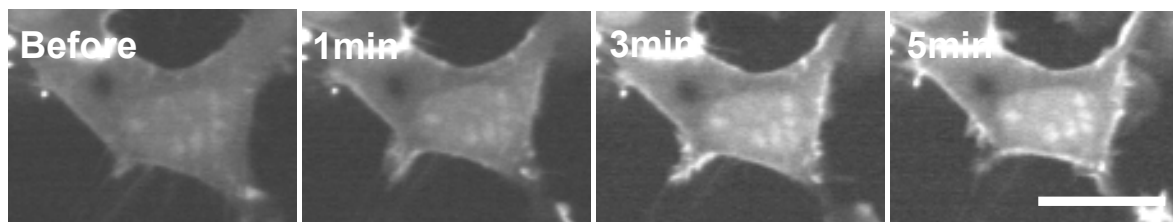

### PDK1-PH (NM\_002613)

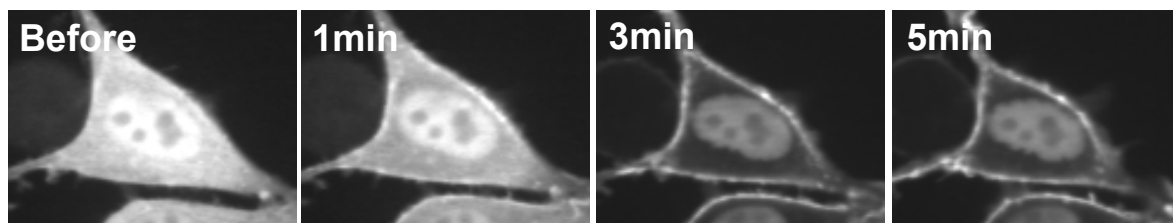

### PHLDB1-PH (NM\_153537)

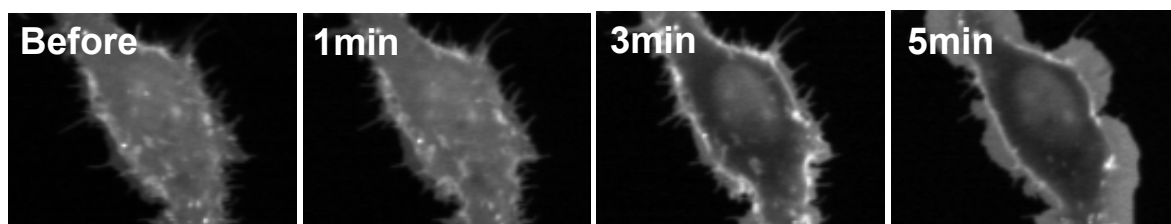

### PHLPP-PH (XM\_984950)

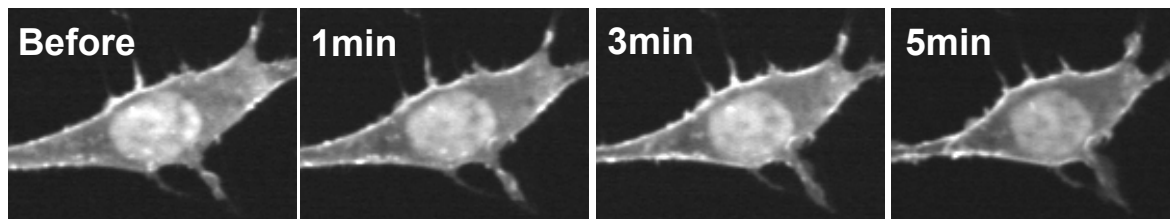

### PLEK2-PH (NM\_013738)

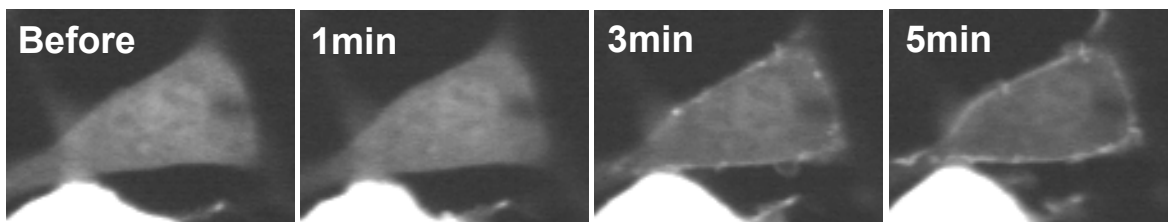

**PLEK2-PH2 (NM\_013738)**

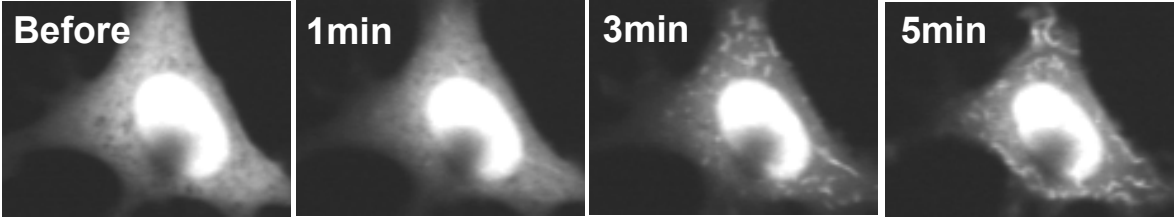

**PLEKHA1-PH (NM\_133942)**

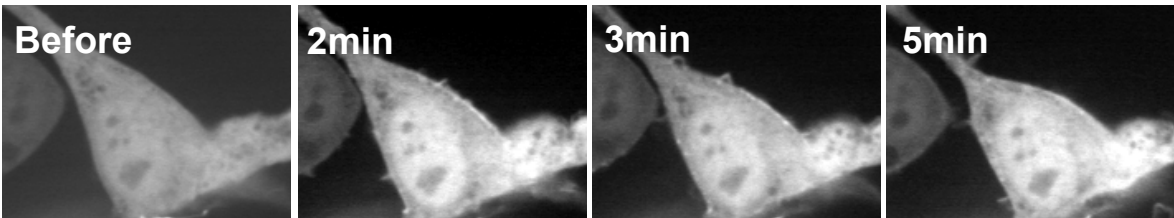

**PLEKHA2-PH2 (NM\_031257)**

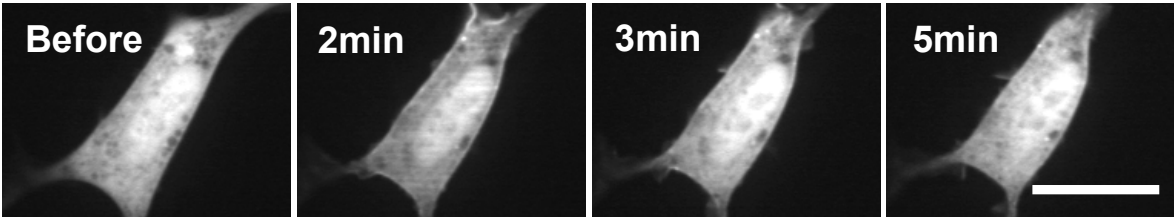

**PSCD1-PH (NM\_011180)**

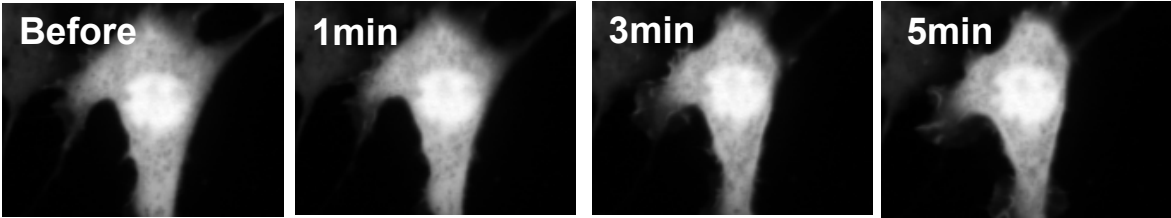

**PSCD1-PH (NM\_011180, imaged in RAW264.7 cells with c5a stimulation)**

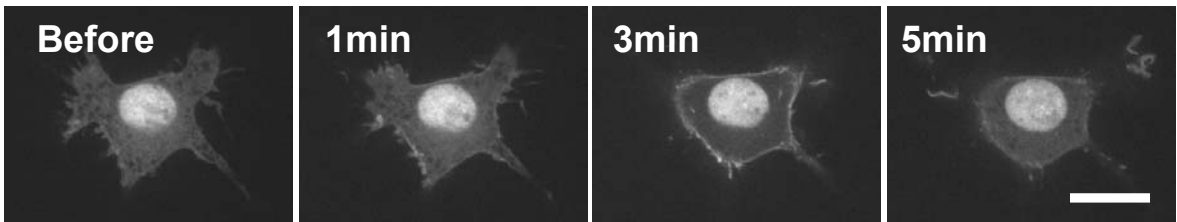

**PSCD2-PH (NM\_011181)**

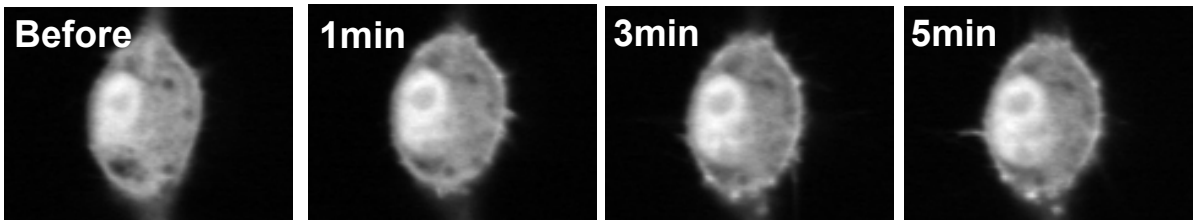

**PSCD3-PH (NM\_011182)**

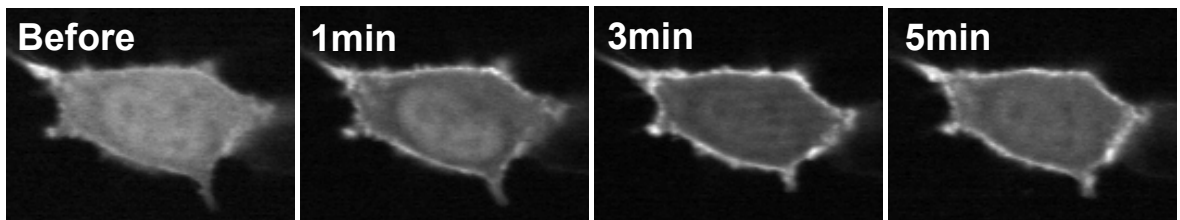

**RASA2-PH (NM\_053268)**

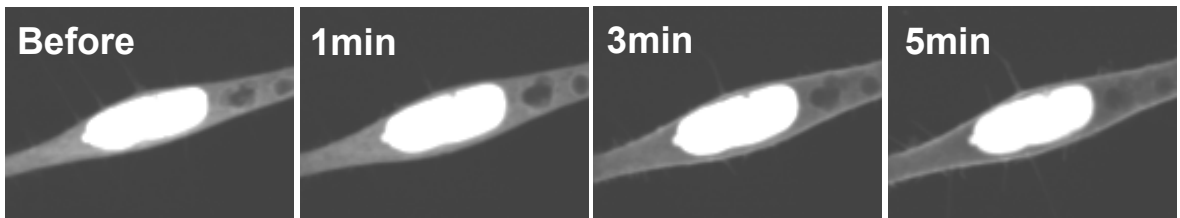

**SH3BP2-PH (NM\_011893)**

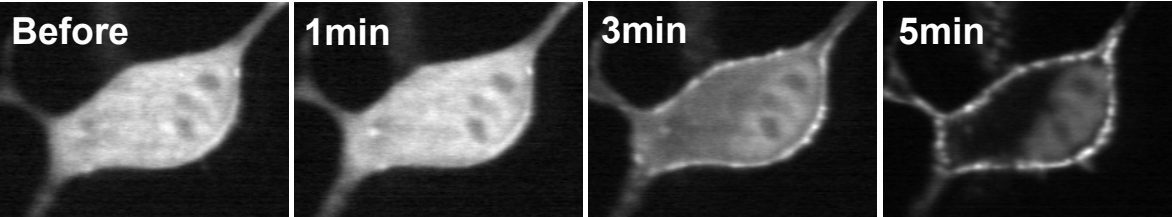

**TEC-PH (AK139329, BC037071)**

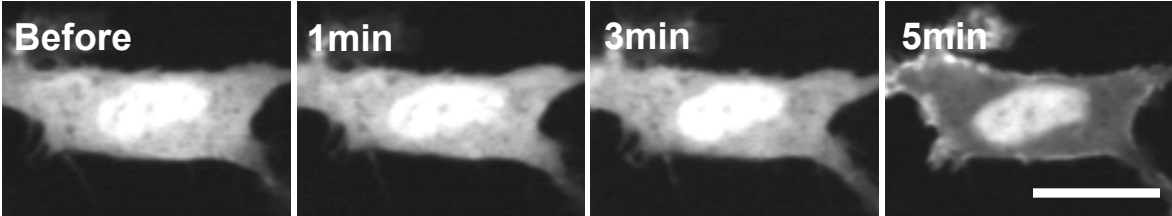

Supplement: NIHMS180892-supplement-Supp_2.pdf [file NIHMS180892-supplement-Supp_2.pdf]
