# Supplementary material
Source: PubMed Central journal article supplement (PMC3523718)

1) 2610034M16Rik-PH (NM\_027001)

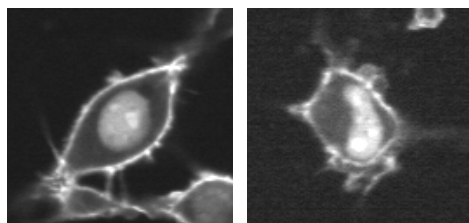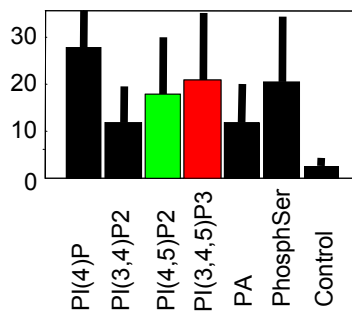

2) 2610034M16Rik-PH2 (NM\_027001)

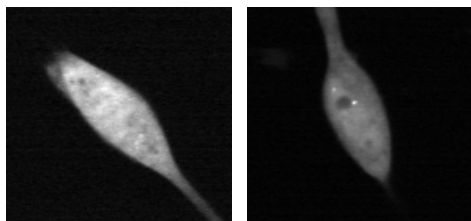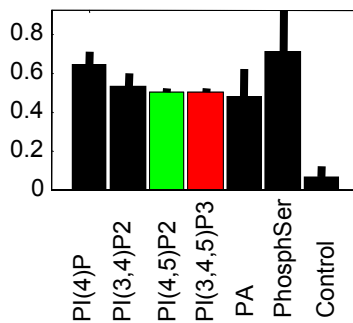

3) ABR-PH (NM\_198894)

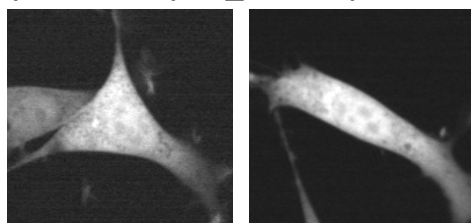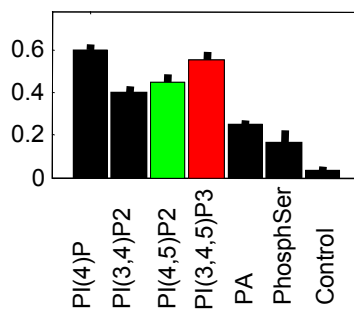

4) ADRPK1-PH (NM\_130863)

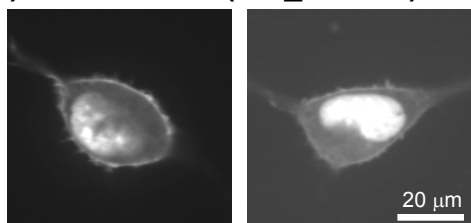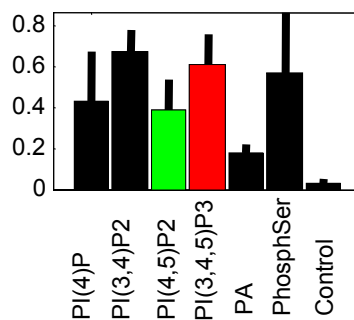

**5) AFAP1-PH (NM\_027373)**

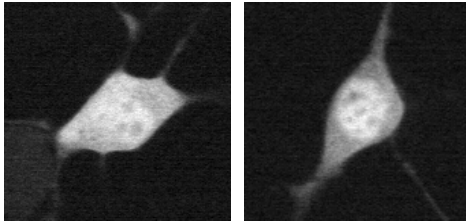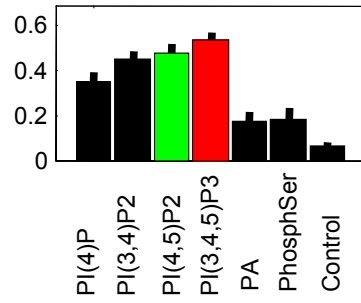

**6) AKAP13-PH (XM\_907140, XM\_133543)**

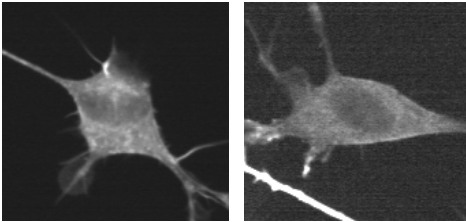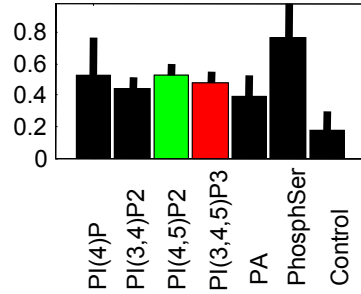

**7) AKT1-PH (NM\_009652)**

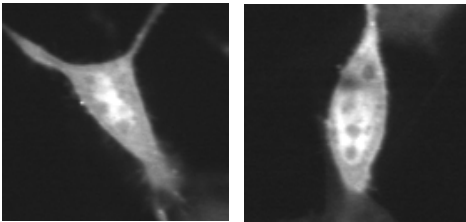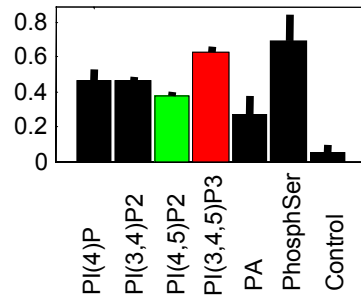

**8) AKT2-PH (NM\_007434)**

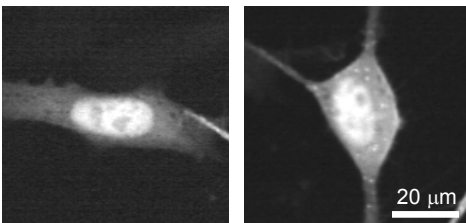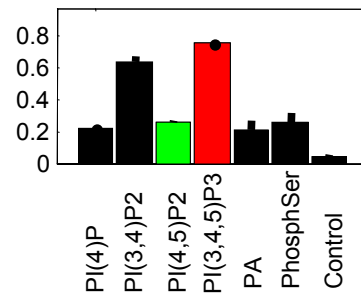

**9) AKT3-PH (NM\_011785)**

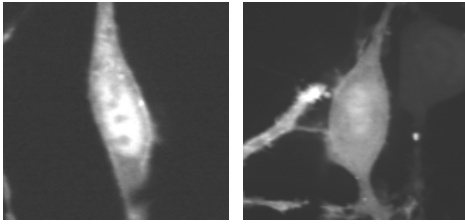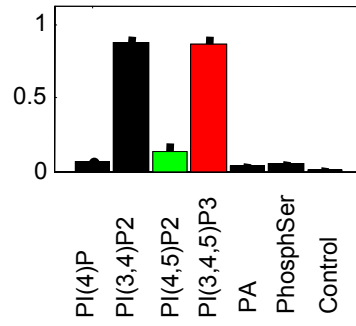

**10) APBB1IP-PH (NM\_019456)**

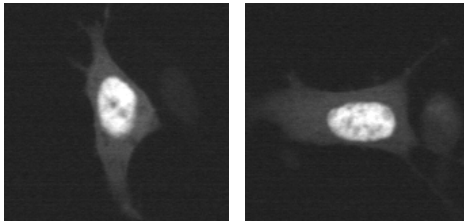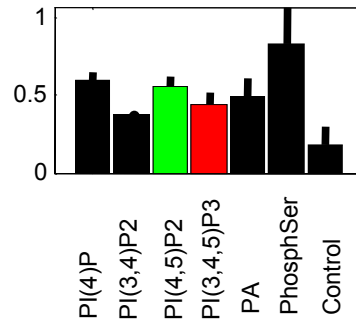

**11) ARHGEF18-PH (NM\_133962)**

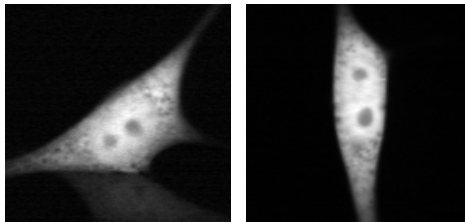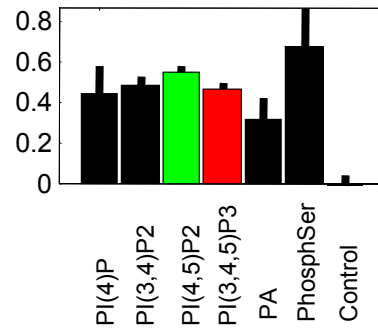

**12) ARHGAP10-PH (NM\_030113)**

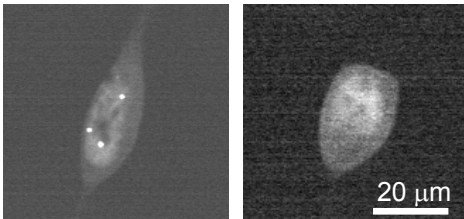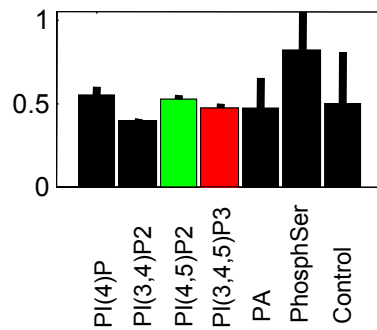

**13) ARHGEF2-PH (NM\_008487)**

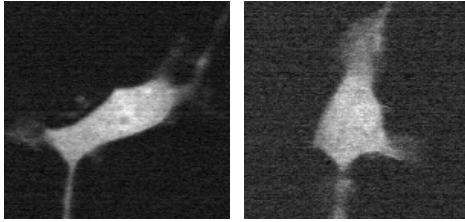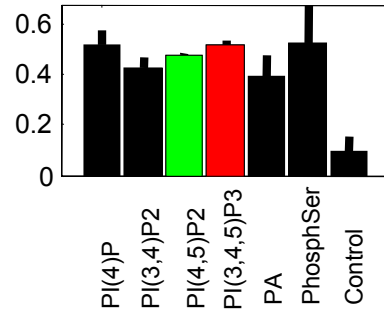

**14) ARHGEF3-PH (NM\_027871)**

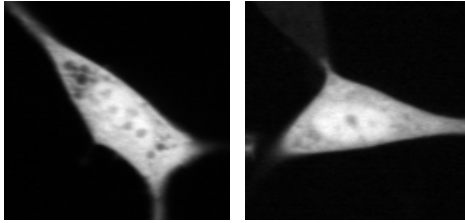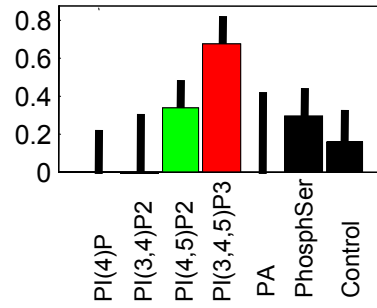

**15) ARHGEF7-PH (NM\_017402)**

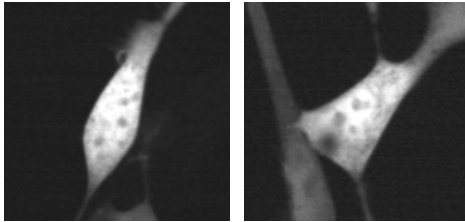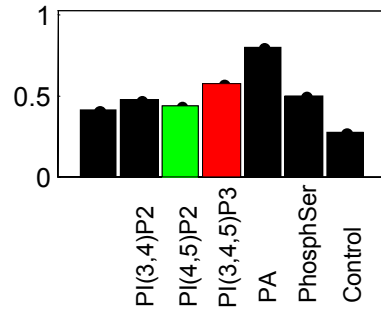

**16) BTK-PH (NM\_013482)**

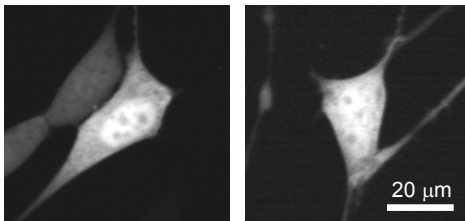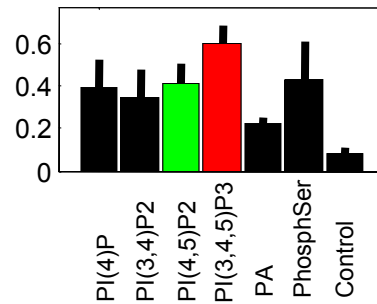

### 17) CADPS-PH (NM\_012061)

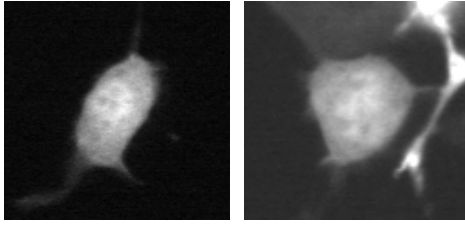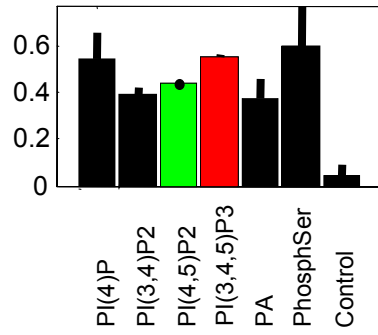

### 18) CENTB5-PH (NM\_207223)

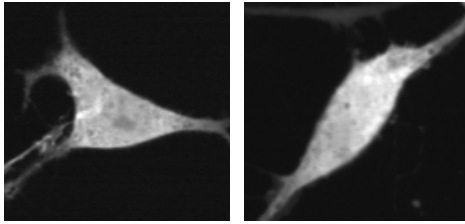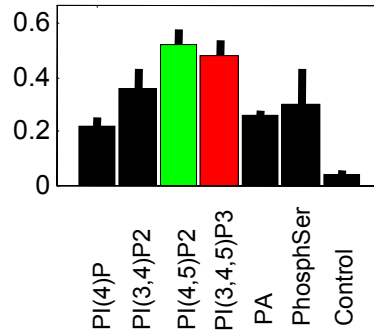

### 19) CENTD1-PH (XM\_132099)

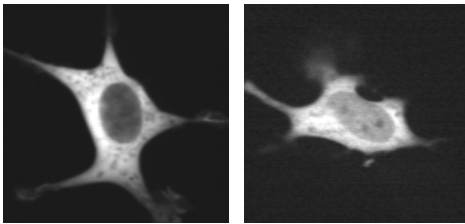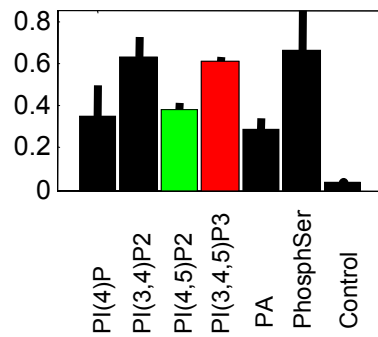

### 20) CENTD1-PH2 (XM\_132099)

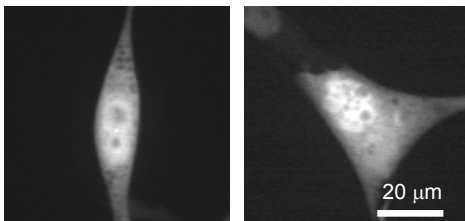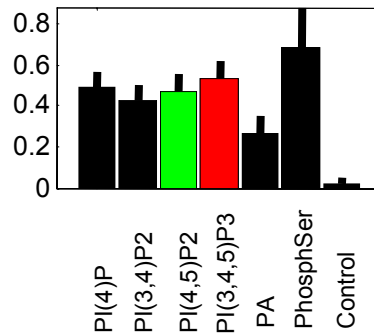

### 21) CENTD2-PH (NM\_027180)

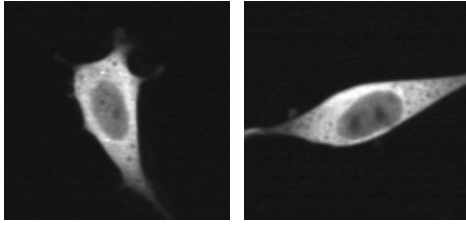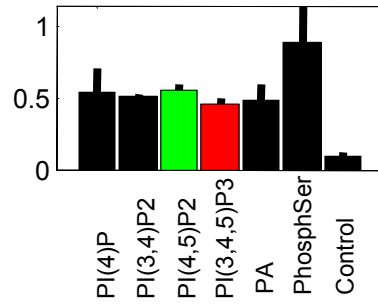

### 22) CENTD2-PH (NM\_027180)

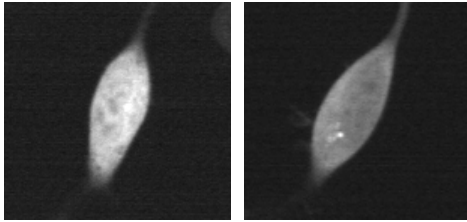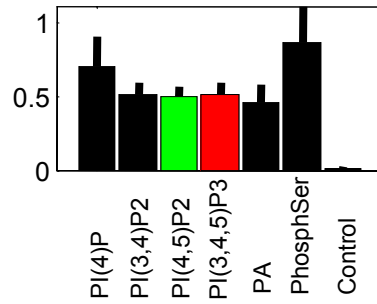

### 23) CIT-PH (NM\_007708)

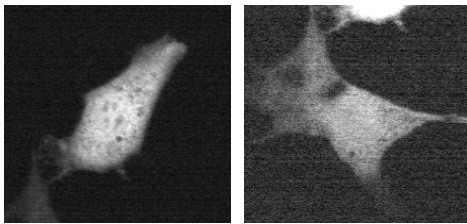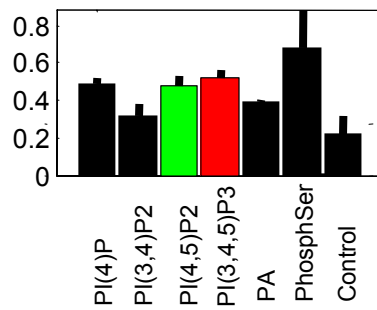

### 24) CNKSR2-PH (NM\_177751)

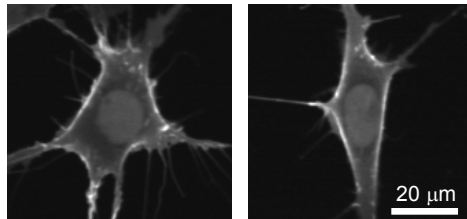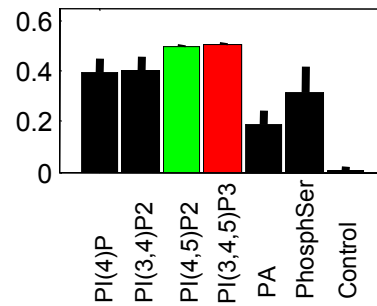

25) COL4ABP3-PH (NM\_023420)

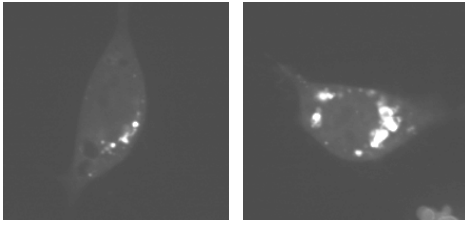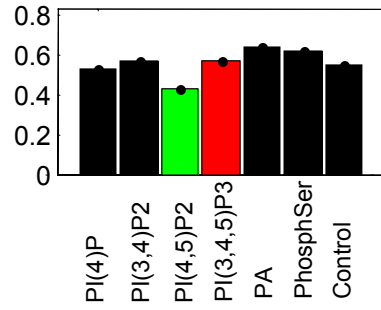

26) DAPP1-PH (NM\_011932)

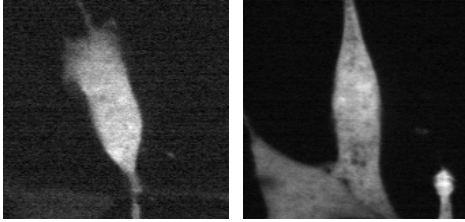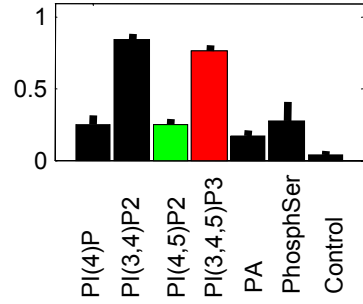

27) DDEF1-PH (NM\_010026)

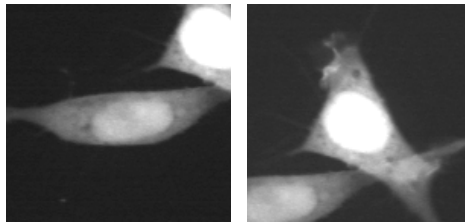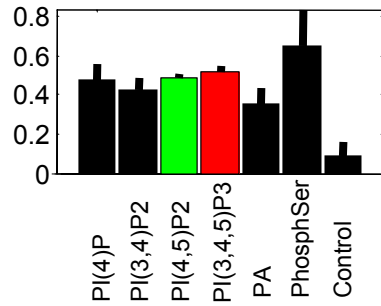

28) DGKD-PH (XM\_906228)

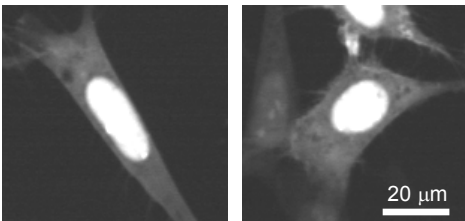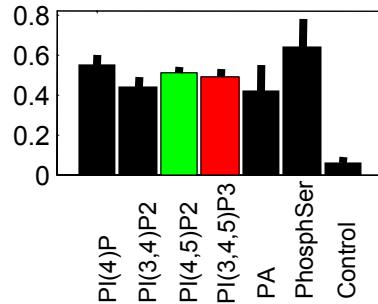

29) DNM1-PH (NM\_010065)

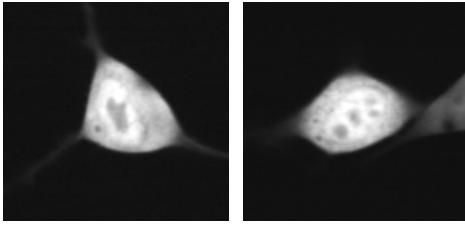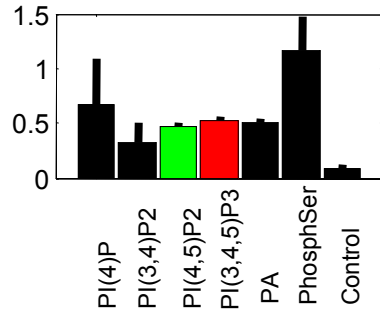

30) DNM2-PH (NM\_007871)

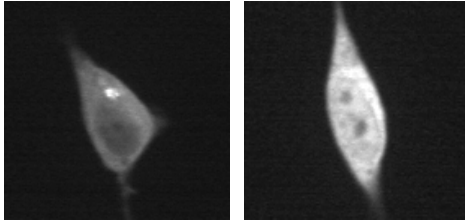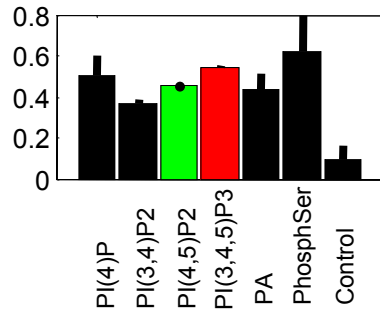

31) DOK1-PH (NM\_010070)

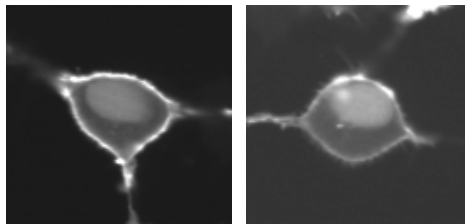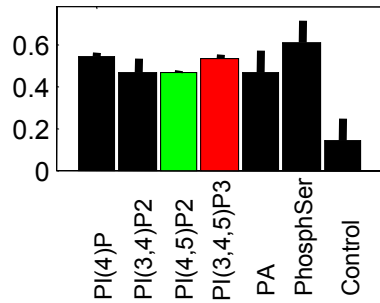

32) DOK4-PH (NM\_053246)

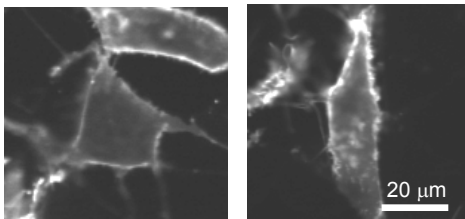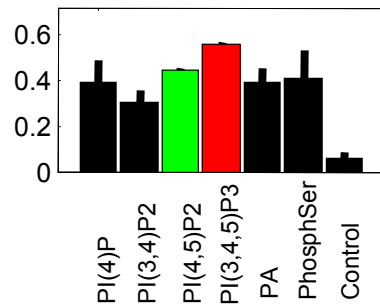



### 33) DOK5-PH (NM\_029761)

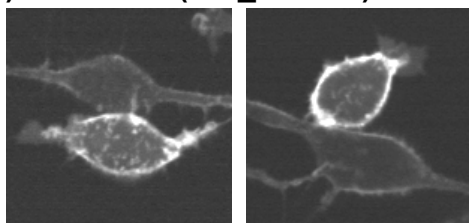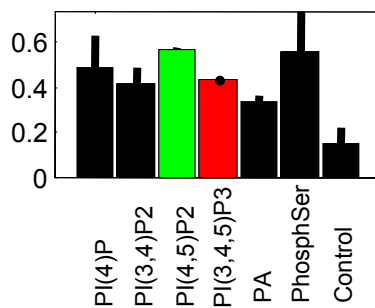

### 34) FARP1-PH (NM\_134082)

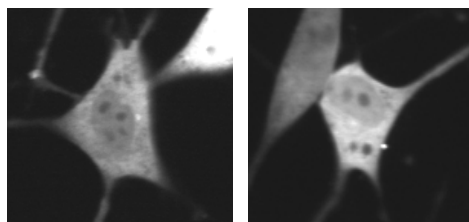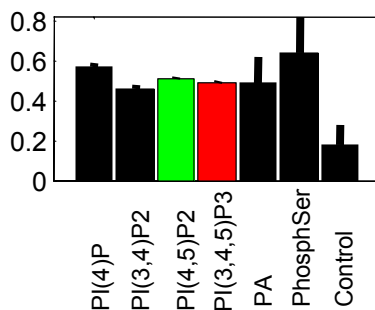

### 35) FARP1-PH2 (NM\_134082)

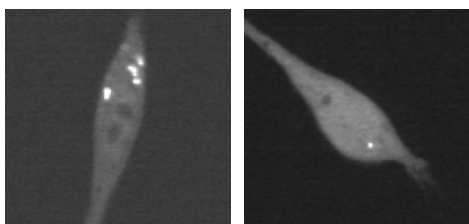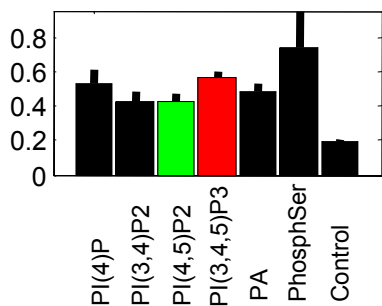

### 36) FGD1-PH (NM\_008001)

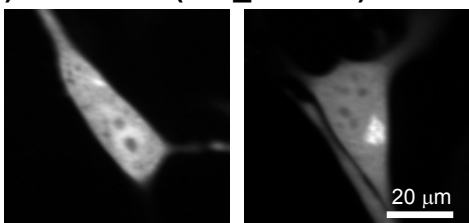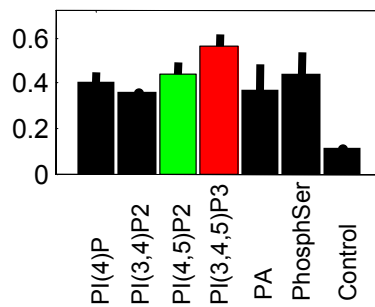

37) FGD1-PH2 (NM\_008001)

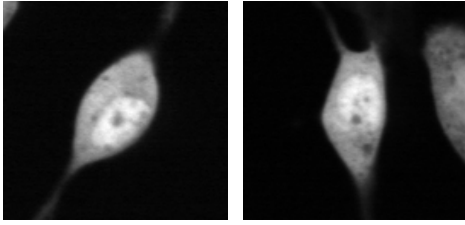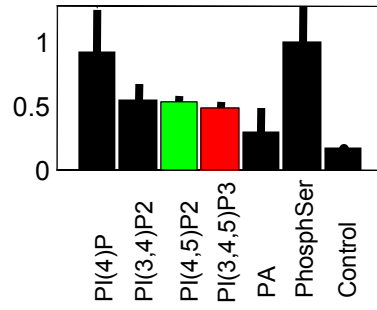

38) FGD1-PHB (NM\_008001)

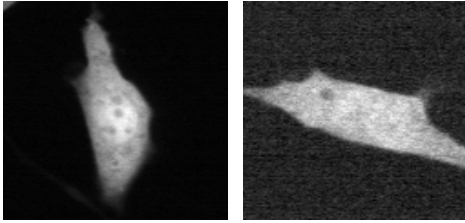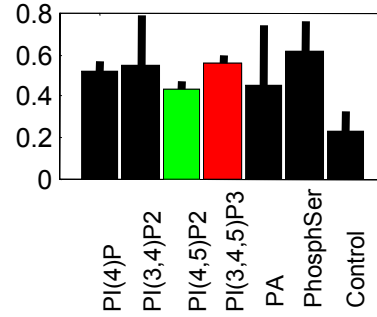

39) FGD2-PH (NM\_013710)

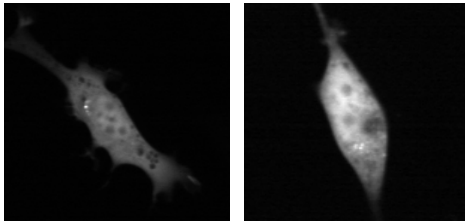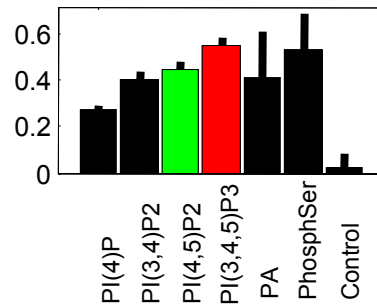

40) FGD3-PH (NM\_015759)

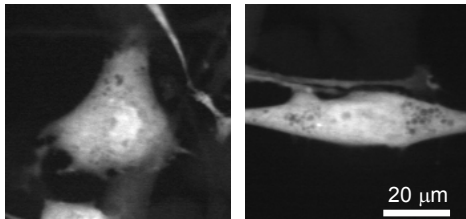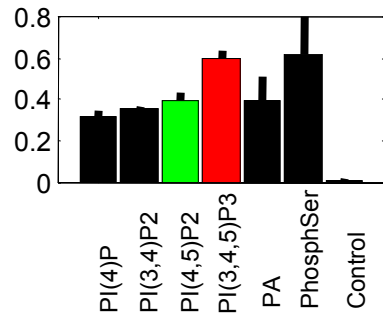

#### 41) FGD6-PH (NM\_053072)

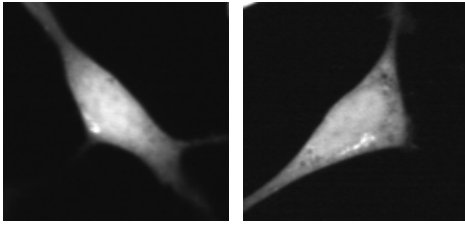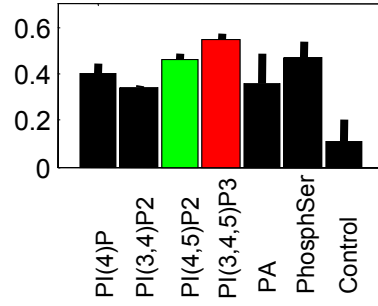

#### 42) FGD6-PH2 (NM\_053072)

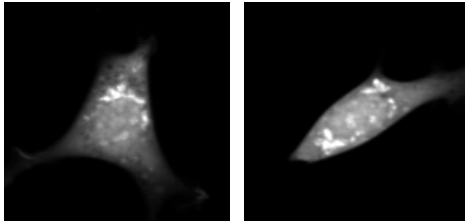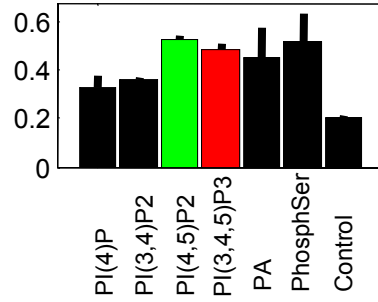

#### 43) FGD6-PHT (NM\_053072)

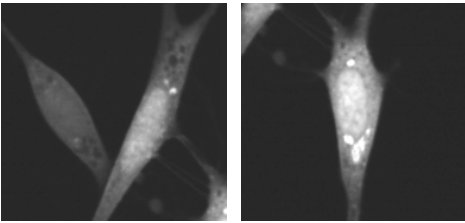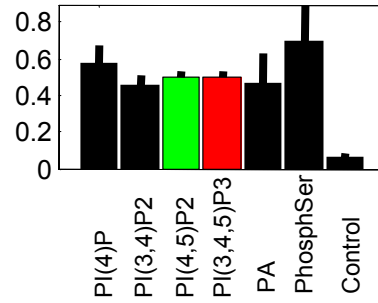

#### 44) GAB1-PH (NM\_021356)

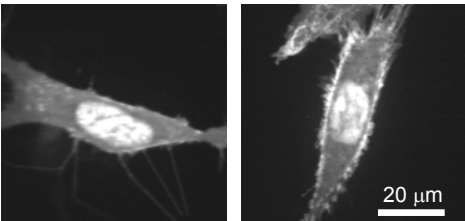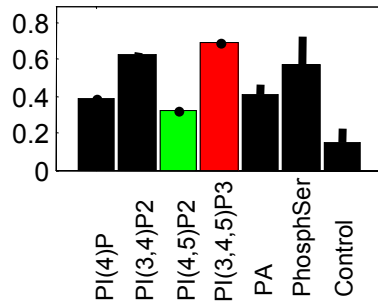

45) GAB2-PH (NM\_010248)

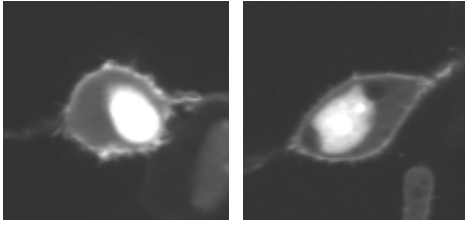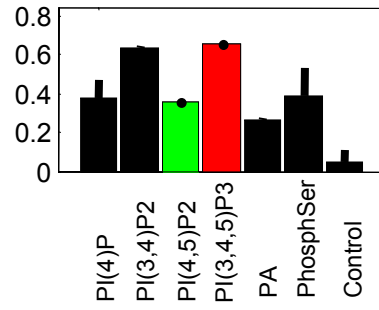

46) GEFT-PH (NM\_028027)

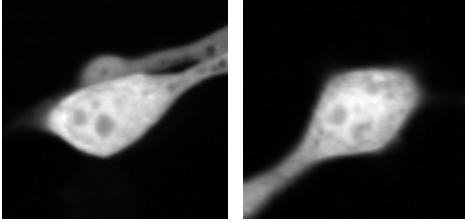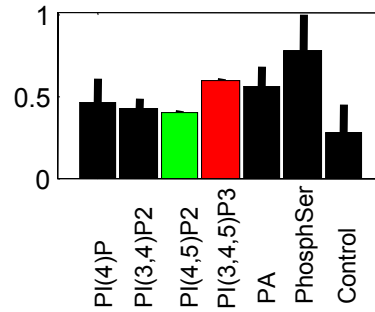

47) GRB10-PH (NM\_010345)

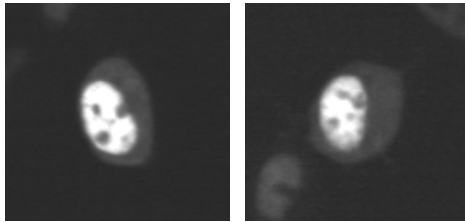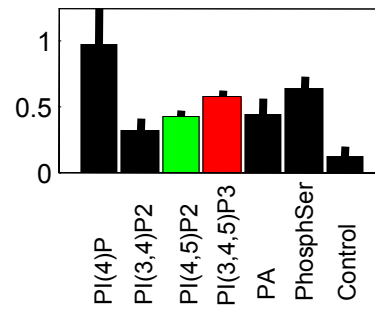

48) GRB14-PH (NM\_016719)

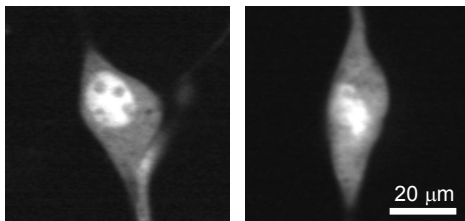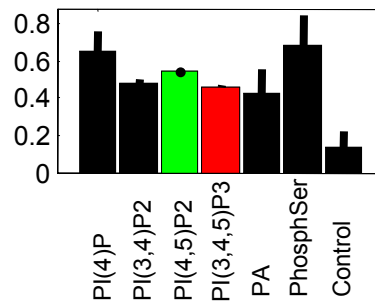

### 49) GRB7-PH (NM\_010346)

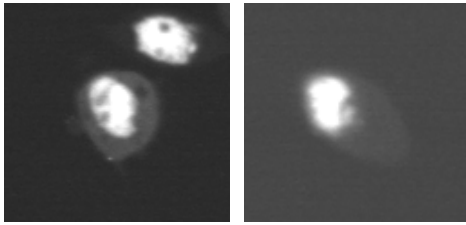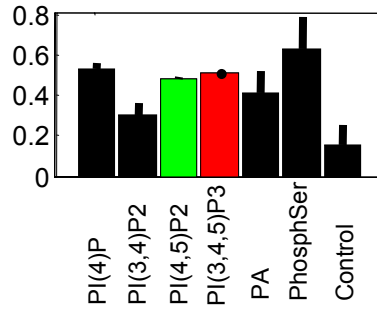

### 50) IRS1-PH (NM\_010570)

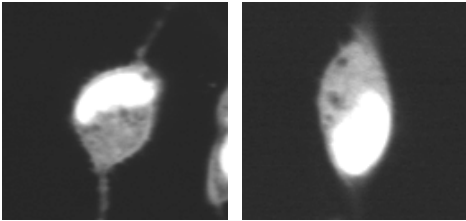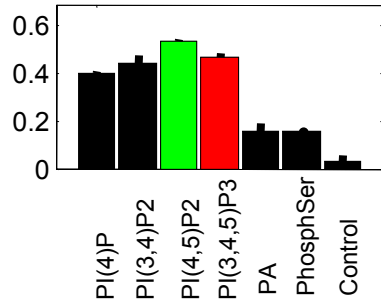

### 51) ITK-PH (NM\_010583)

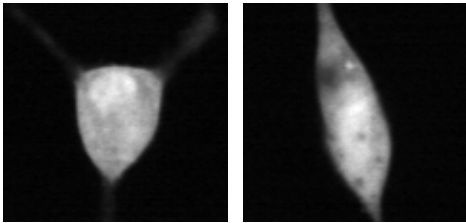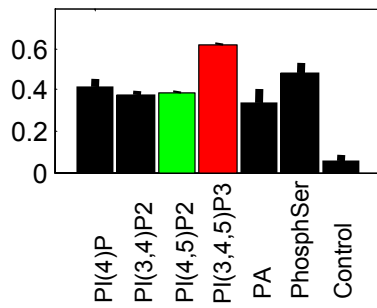

### 52) ITSN1-PH (NM\_010587)

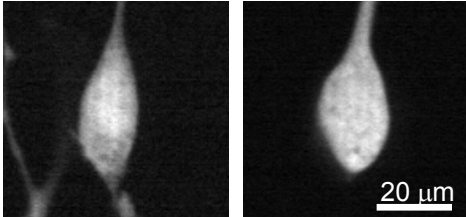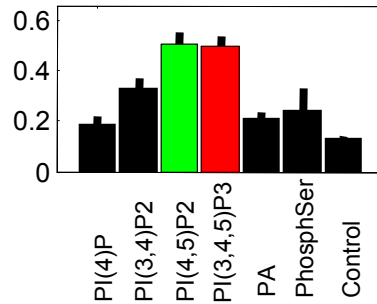

53) ITSN2-PH (NM\_011365)

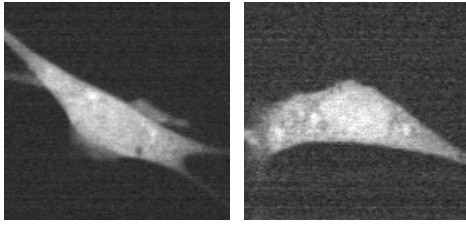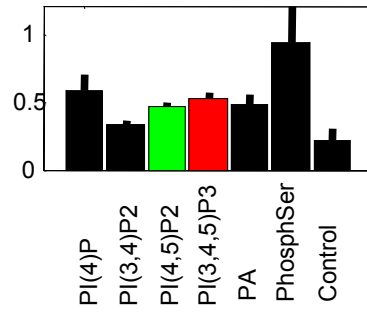

54) KALRN-PH (XM\_993034)

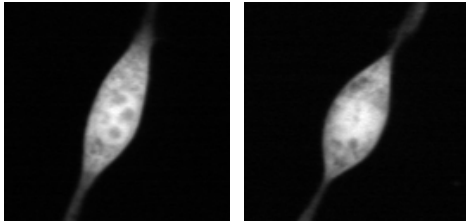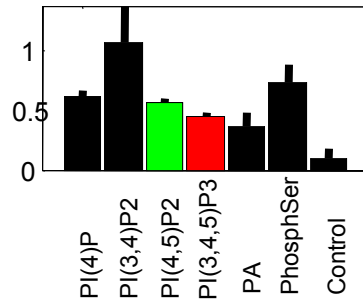

55) KIF1A-PH (NM\_008440)

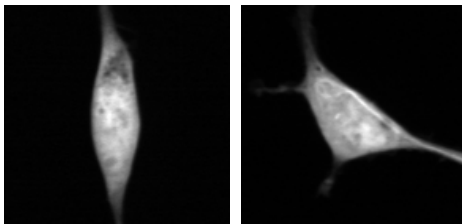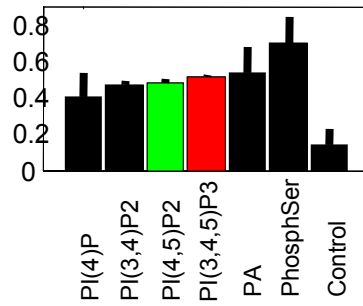

56) KIF1B-PH (NM\_207682)

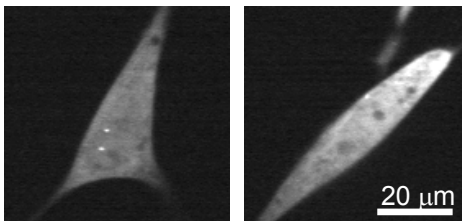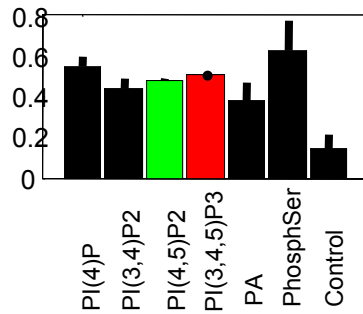

57) MCF2L-PH (NM\_178076)

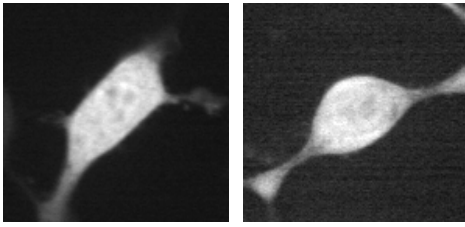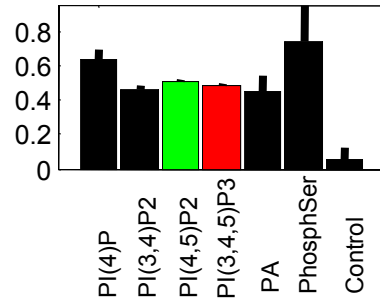

58) MCF2-PH (NM\_133197)

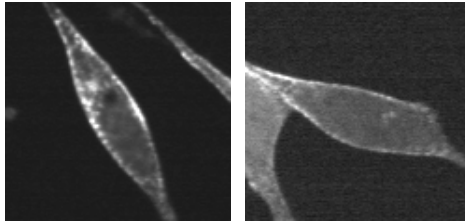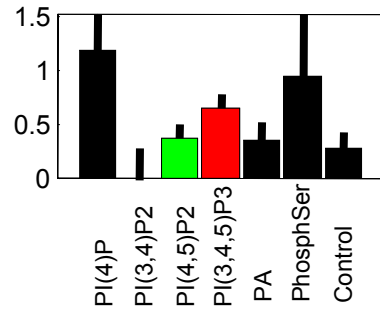

59) M-RIP-PH (NM\_201245)

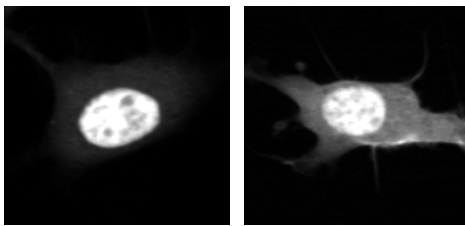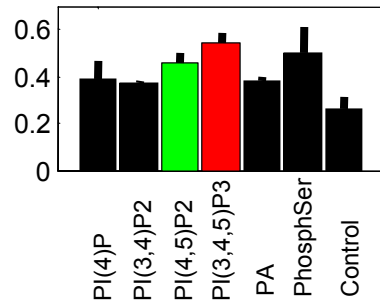

60) M-RIP-PH2 (NM\_201245)

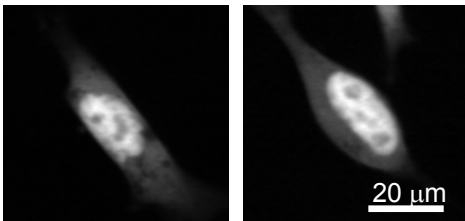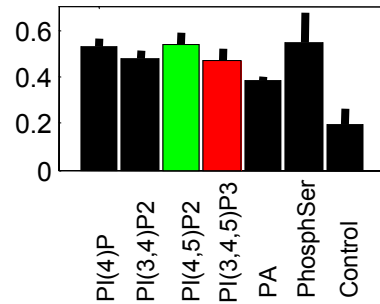

### 61) MYO10-PH (NM\_019472)

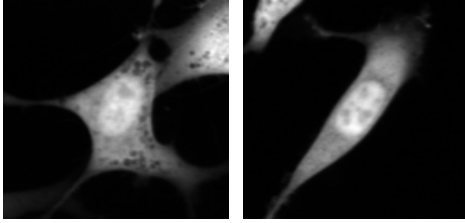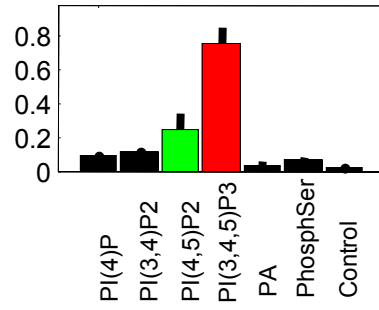

### 62) MYO10-PH2 (NM\_019472)

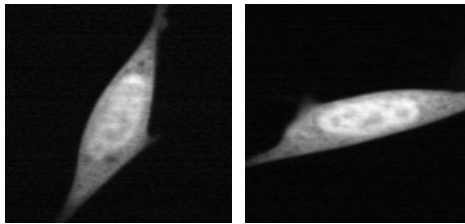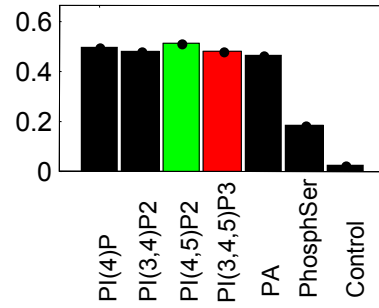

### 63) MYO10-PHT (NM\_019472)

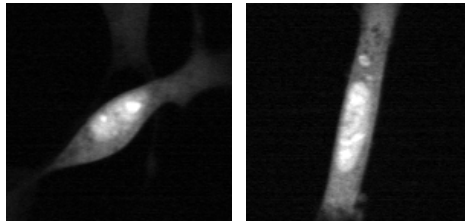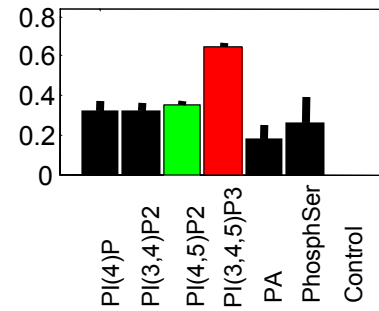

### 64) NET1-PH (NM\_019671)

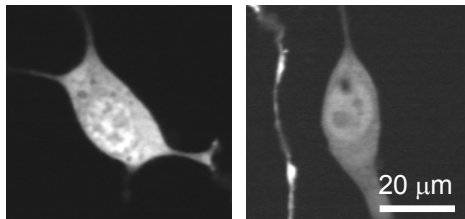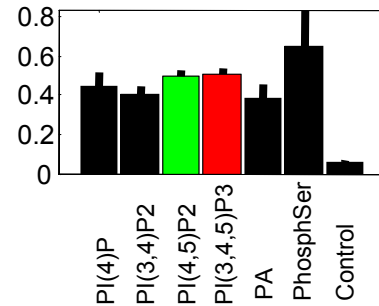



65) NGEF-PH (NM\_019867)

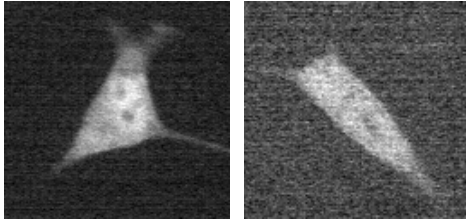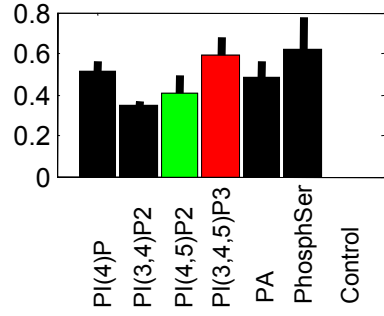

66) OPHN1-PH (NM\_052976)

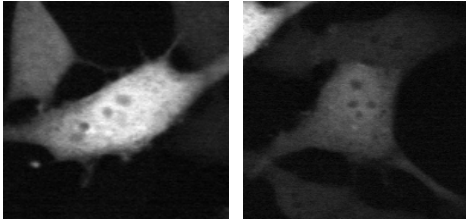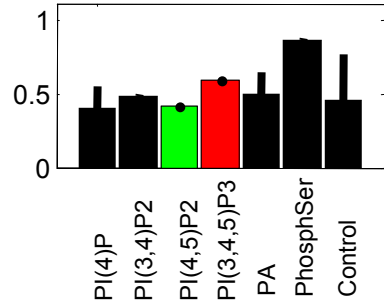

67) OSBPL3-PH (NM\_027881)

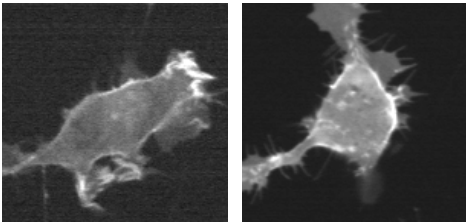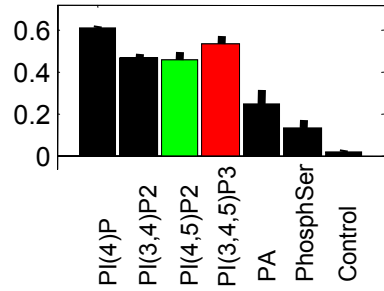

68) OSBPL5-PH (NM\_024289)

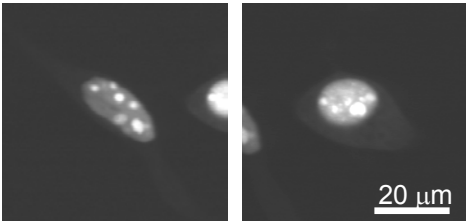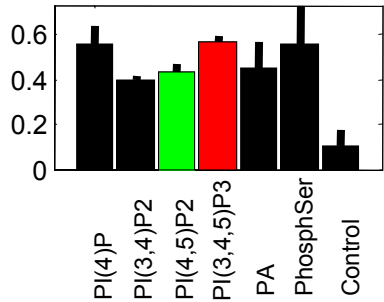

**69) OSBPL7-PH (XM\_193637)**

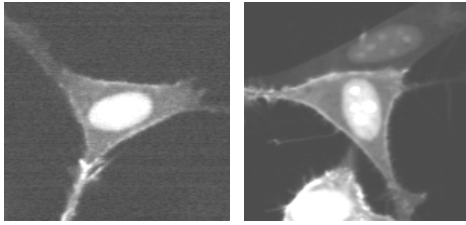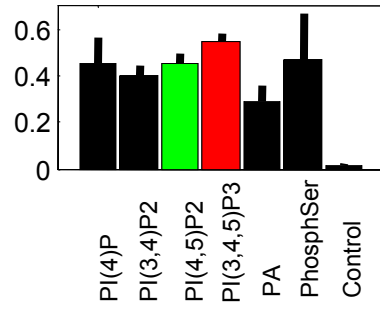

**70) PDK1-PH (NM\_011062)**

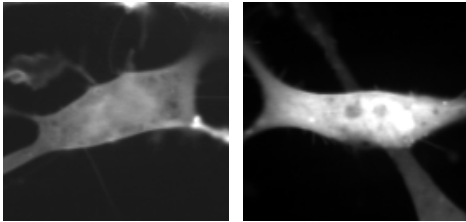

**71) PHLDB1-PH (NM\_153537)**

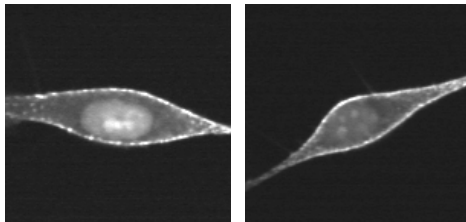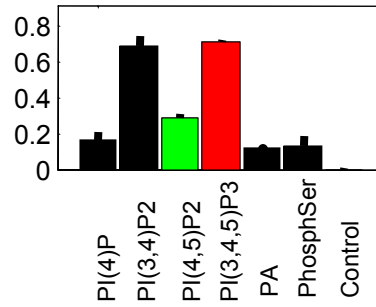

**72) PHLPP-PH (XM\_984950)**

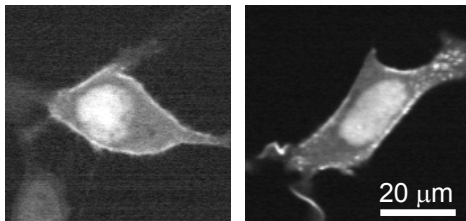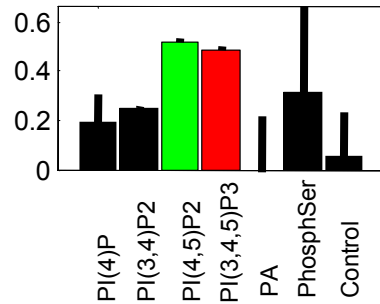

### 73) PLCD1-PH (NM\_019676)

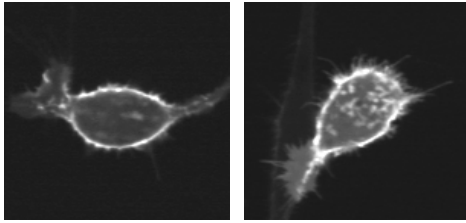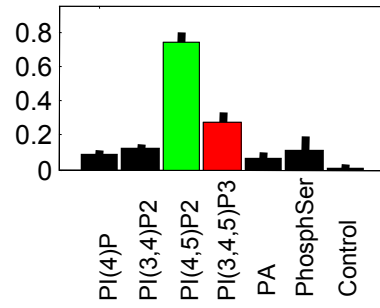

### 74) PLCD4-PH (NM\_148937)

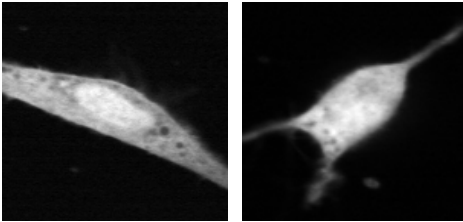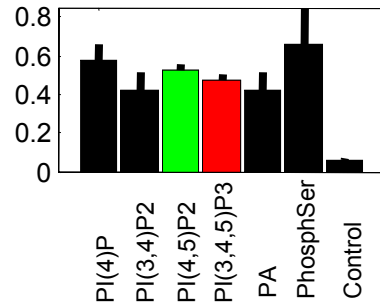

### 75) PLCL2-PH (NM\_013880)

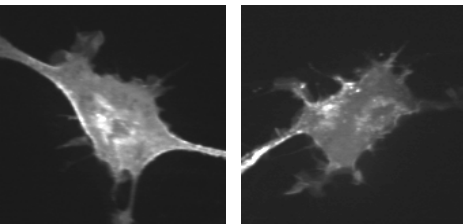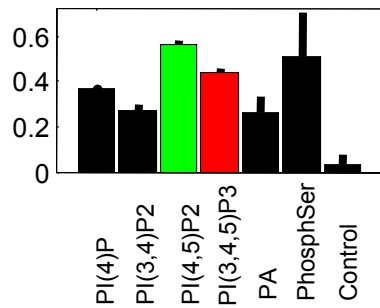

### 76) PLD1-PH (NM\_008875)

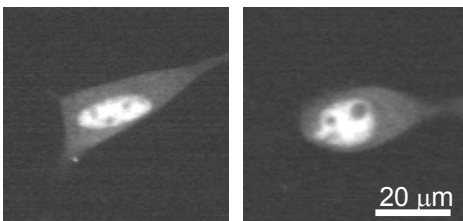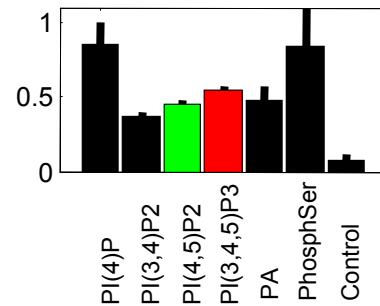

77) PLD2-PH (NM\_008876)

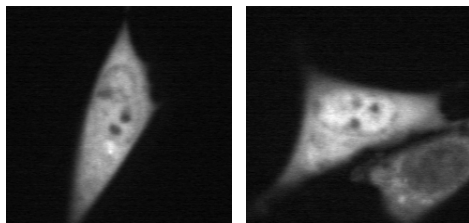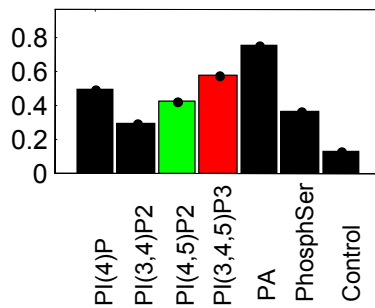

78) PLEK2-PH (NM\_013738)

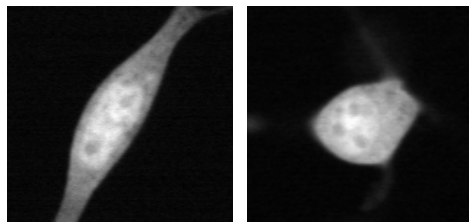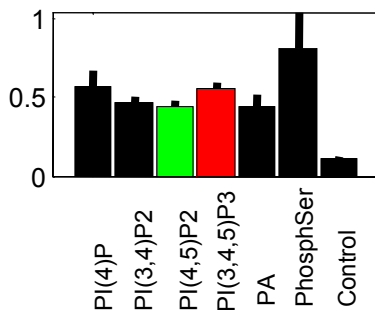

79) PLEK2-PH2 (NM\_013738)

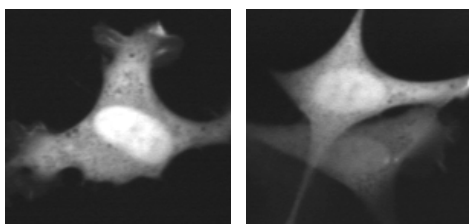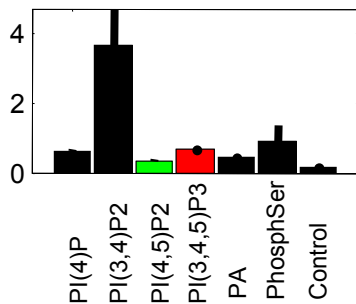

80) PLEKHA1-PH (NM\_133942)

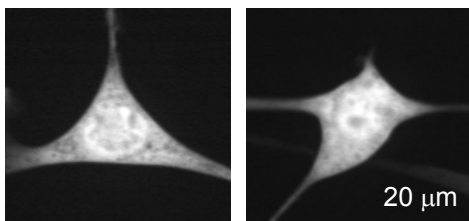

### 81) PLEKHA2-PH (NM\_031257)

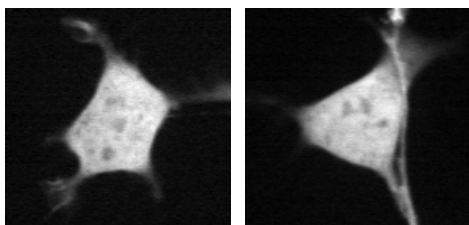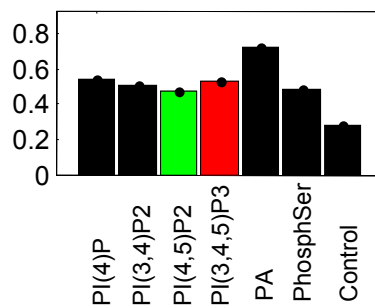

### 82) PLEKHA2-PH2 (NM\_031257)

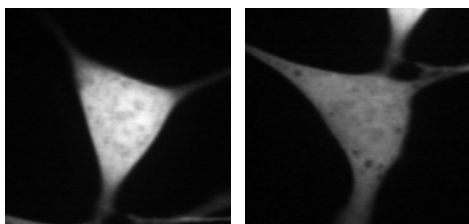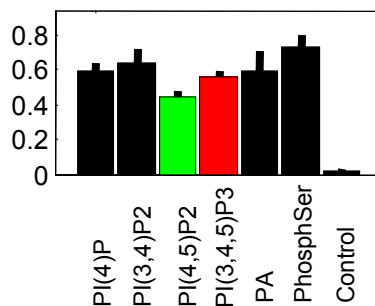

### 83) PLEKHA2-PHT (NM\_031257)

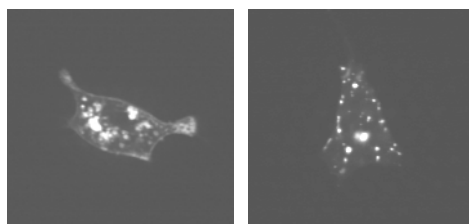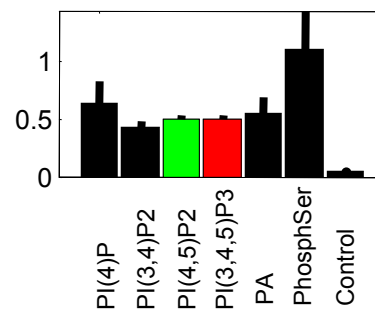

### 84) PLEKHA3-PH (NM\_031256)

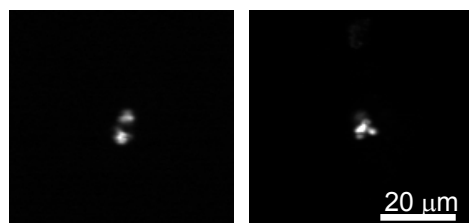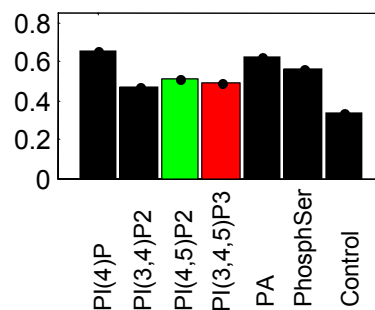

**85) PLEKHA5-PH (NM\_144920)**

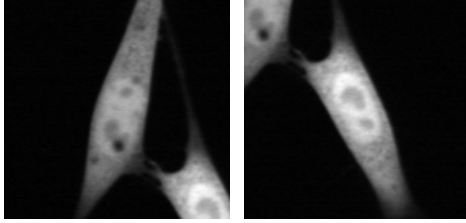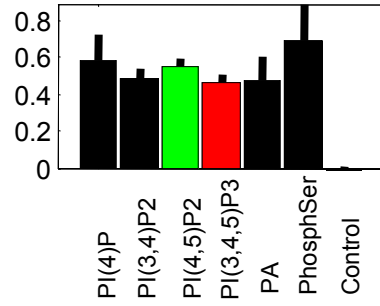

**86) PLEKHB1-PH (NM\_013746)**

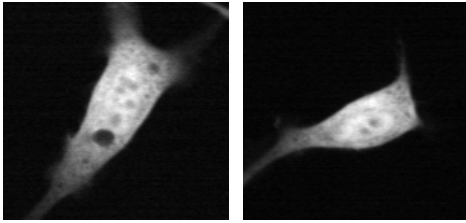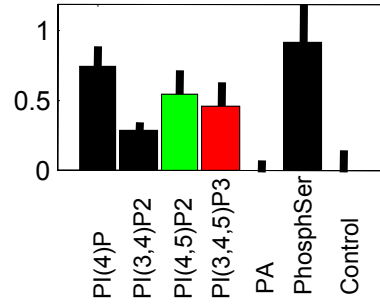

**87) PLEKHB2-PH (NM\_145516)**

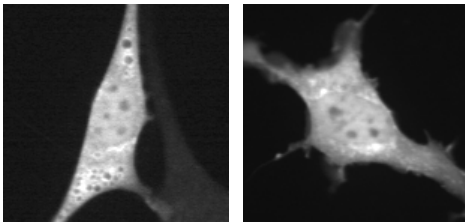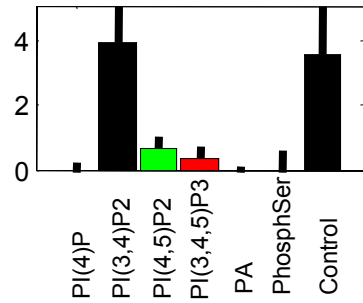

**88) PLEKHC1-PH (NM\_146054)**

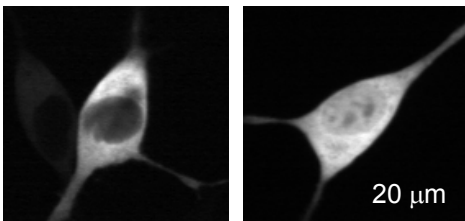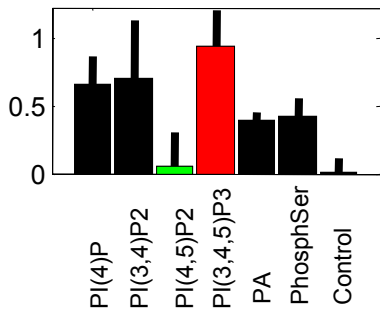

**89) PLEKHF1-PH (NM\_024413)**

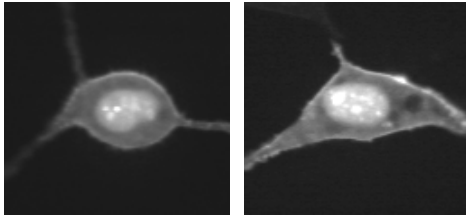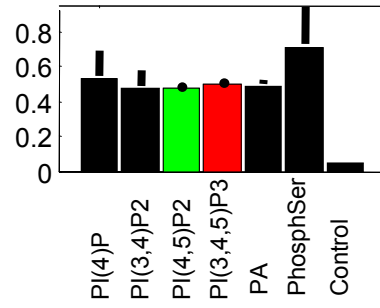

**90) PLEKHJ1-PH (NM\_023900)**

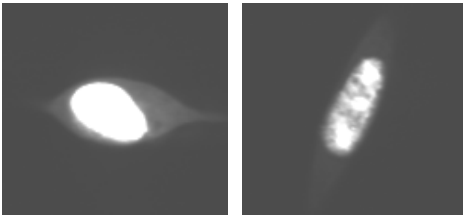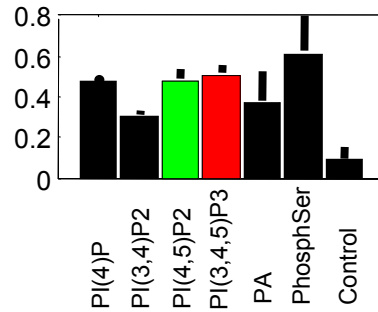

**91) PLEKHM1-PH (NM\_183034)**

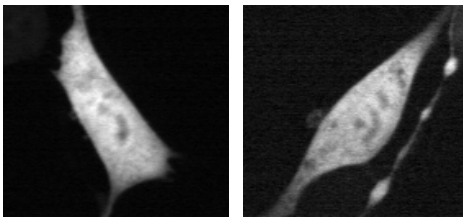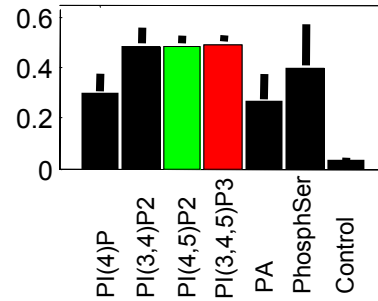

**92) PLEKHM2-PH (XM\_938581)**

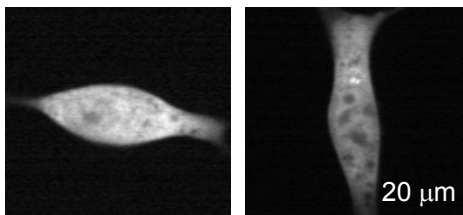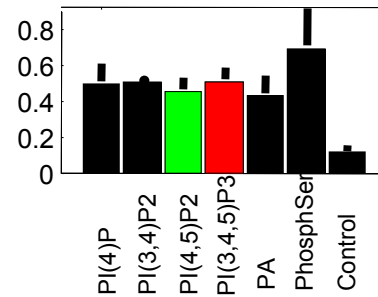

93) PLEKHO1-PH (NM\_023320)

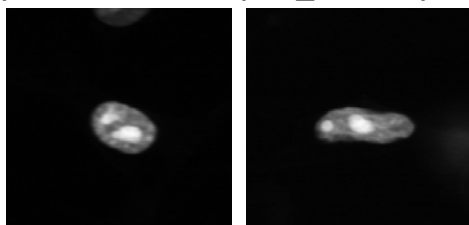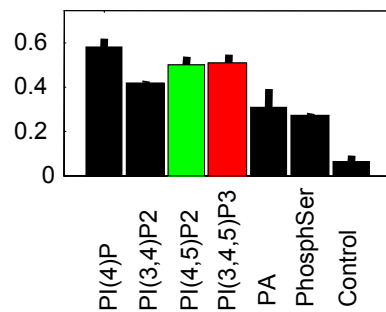

94) PLEK-PH (NM\_019549)

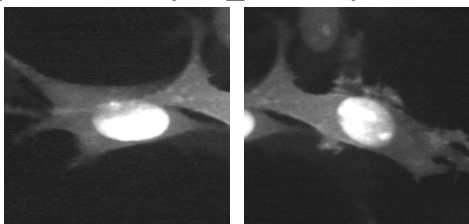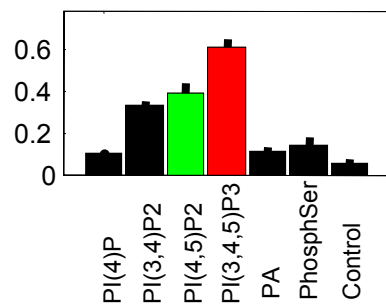

95) PLEK-PH2 (NM\_019549)

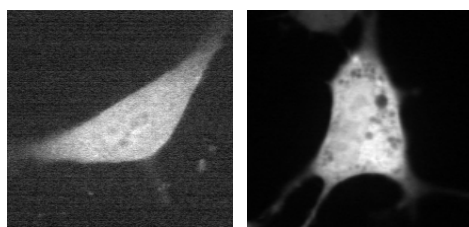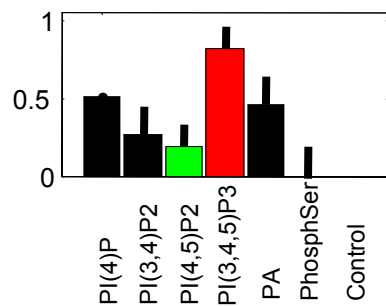

96) PRKCM-PH (NM\_008858)

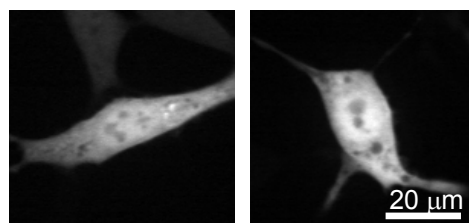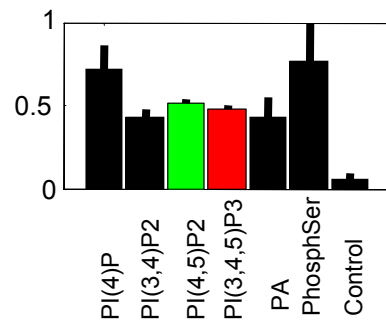



97) PSCD1-PH (NM\_011180)

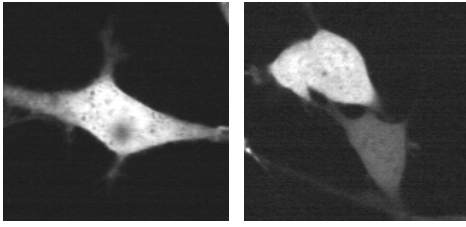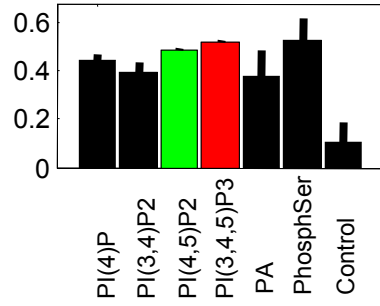

98) PSCD2-PH (NM\_011181)

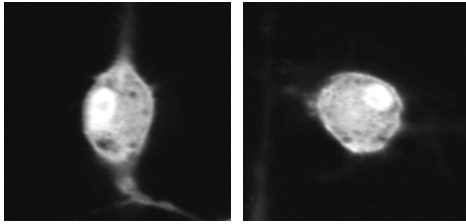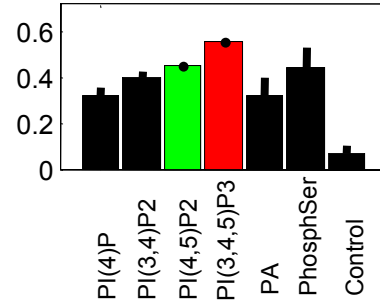

99) PCSD3-PH (NM\_011182)

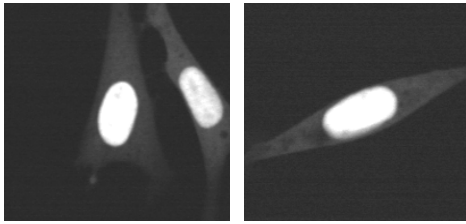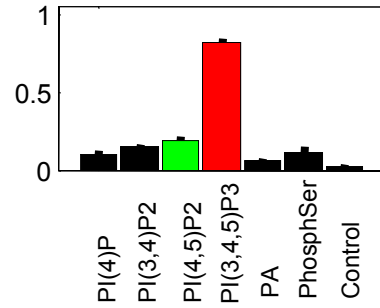

100) PSD2-PH (NM\_028707)

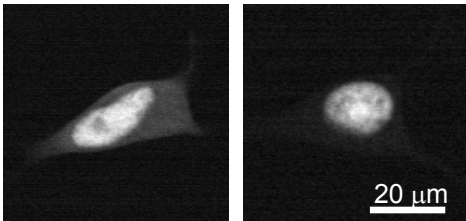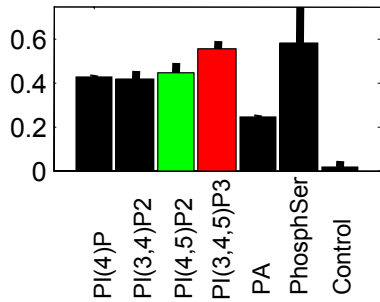

### 101) PSD3-PH (NM\_177698)

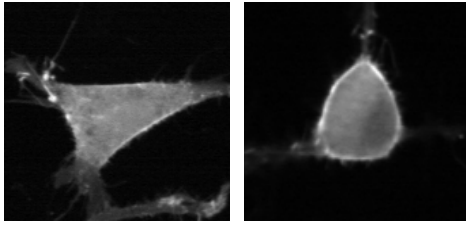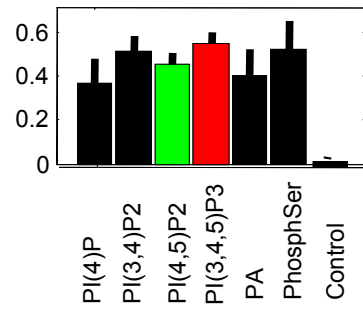

### 102) RALGPS2-PH (NM\_023884)

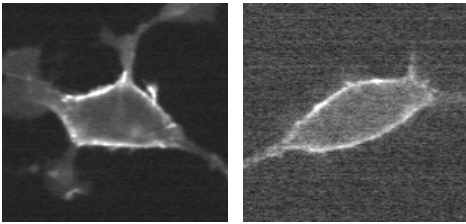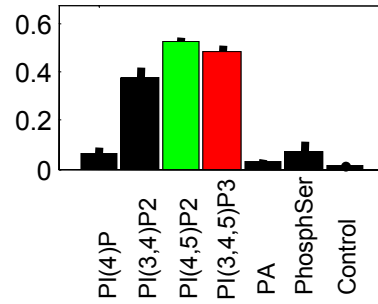

### 103) RASA2-PH (NM\_053268)

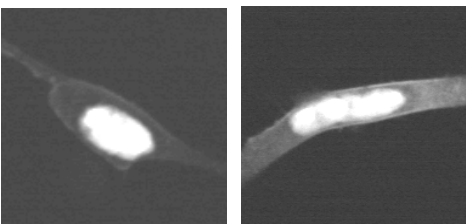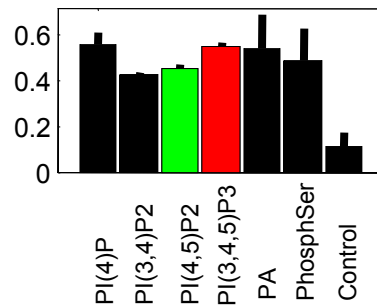

### 104) RASA3-PH (NM\_009025)

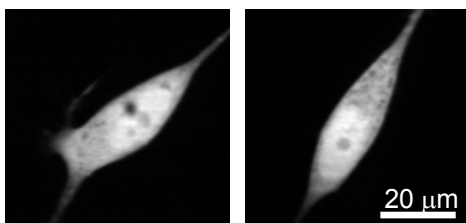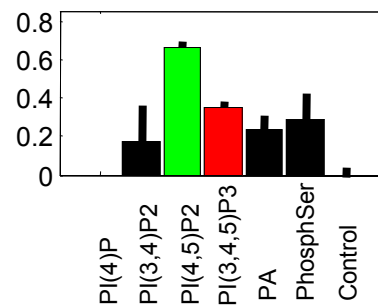

**105) RASA4-PH (NM\_133914)**

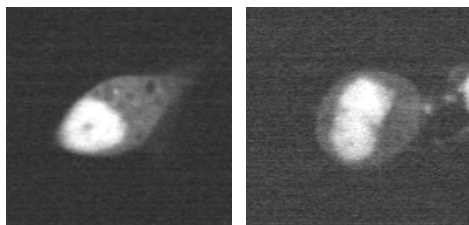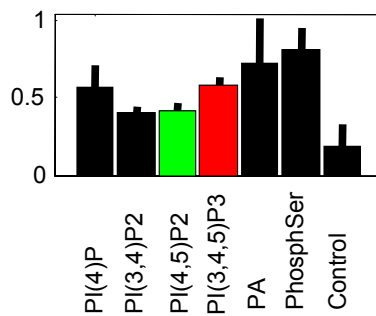

**106) RASAL1-PH (NM\_013832)**

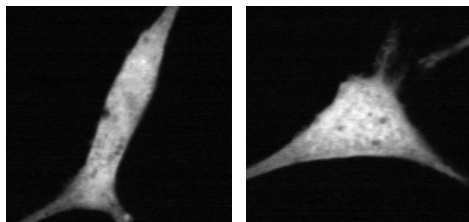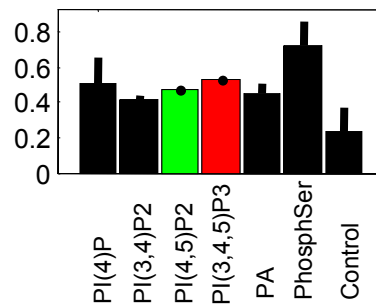

**107) RASGRF1A-PH (NM\_011245)**

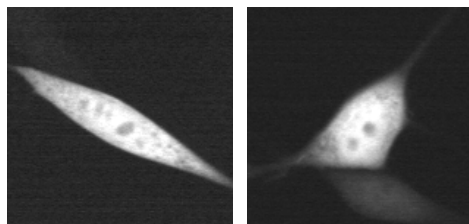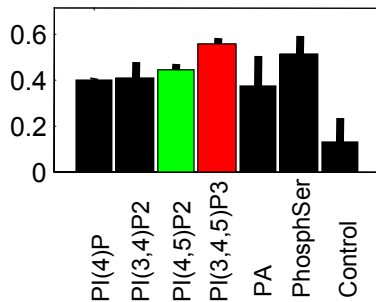

**108) RASGRF1A-PH2 (NM\_011245)**

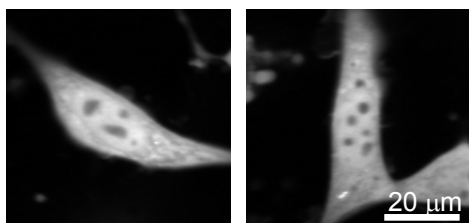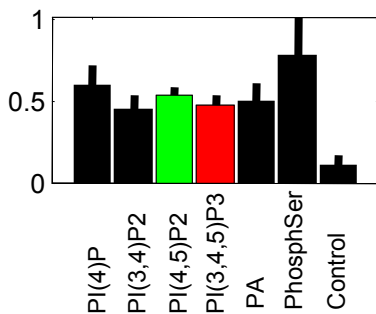

**109) RASGRF1B-PH (NM\_001039655)**

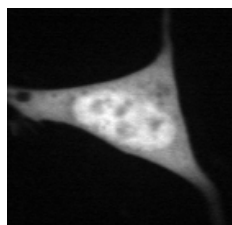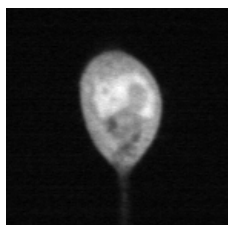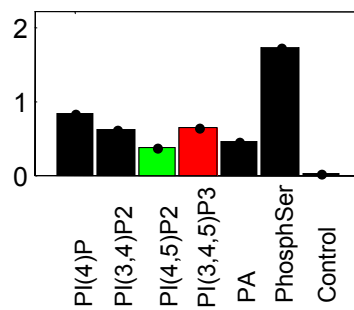

**110) RASGRF2-PH (NM\_009027)**

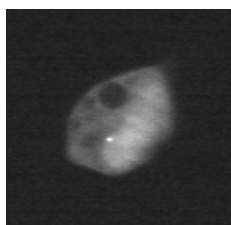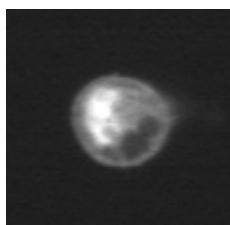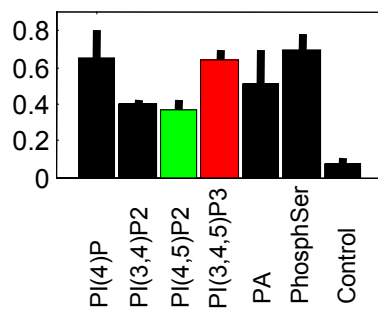

**111) RASGRF2-PH2 (NM\_009027)**

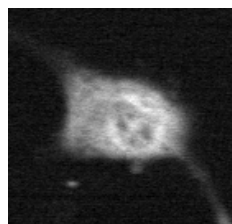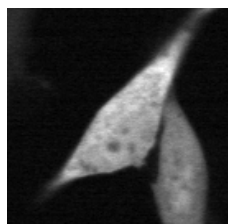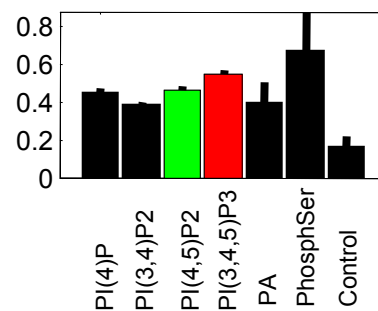

**112) RGNEF-PH (NM\_012026)**

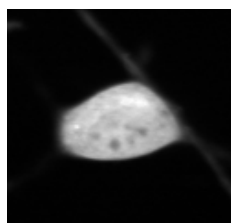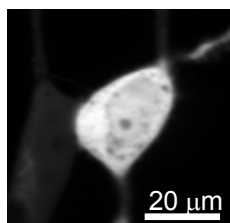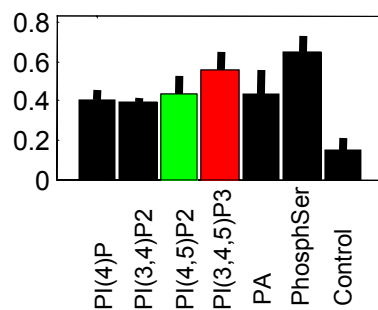

113) ROCK1-PH (NM\_005406)

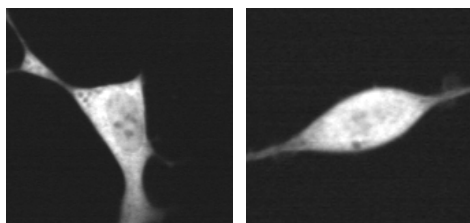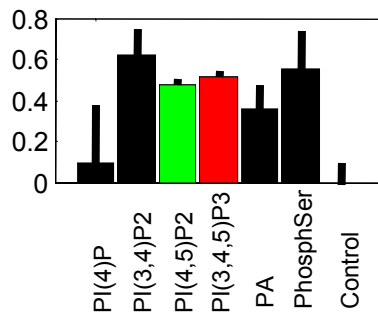

114) SH2B1-PH (NM\_011363)

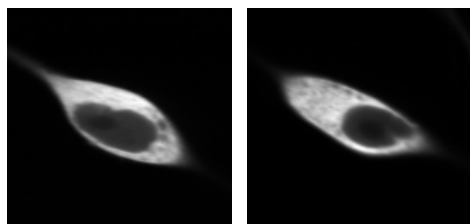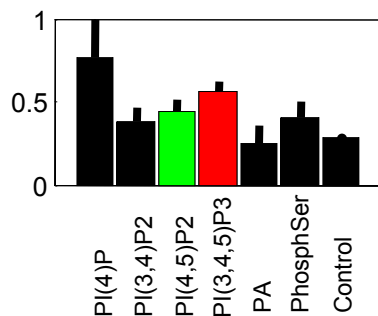

115) SH2B2-PH (NM\_018825)

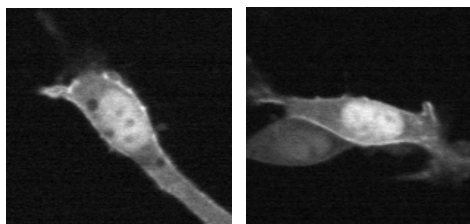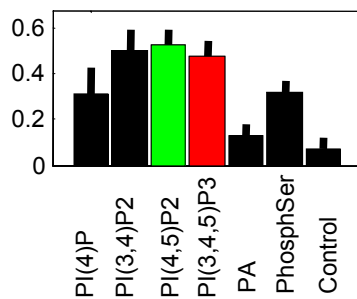

116) SH3BP2-PH (NM\_011893)

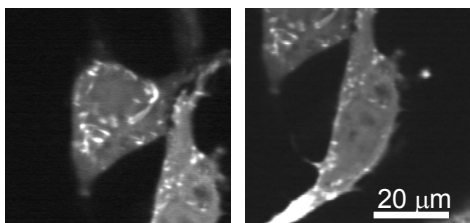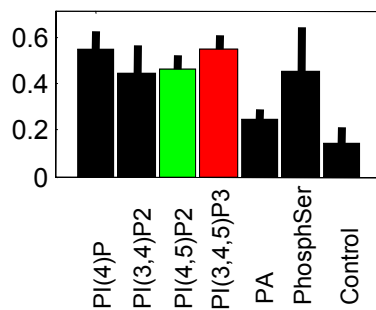

117) SKAP2-PH (NM\_018773)

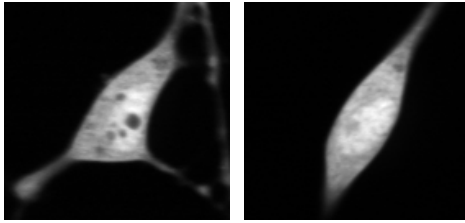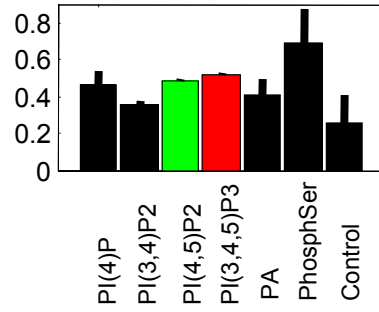

118) SNTA1-PH (NM\_009228)

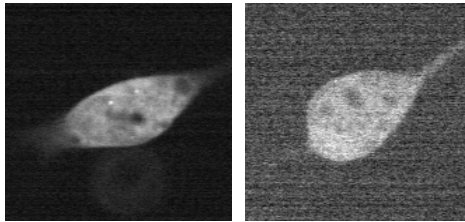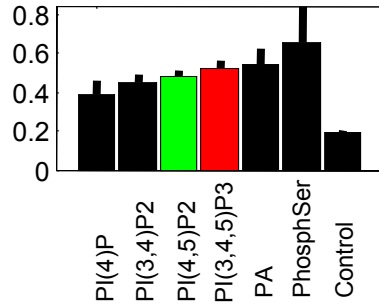

119) SNTB1-PH (NM\_016667)

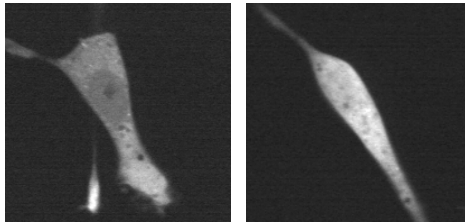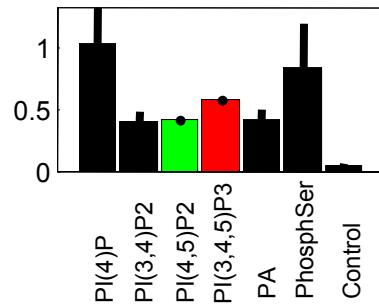

120) SNTB2-PH (NM\_009229)

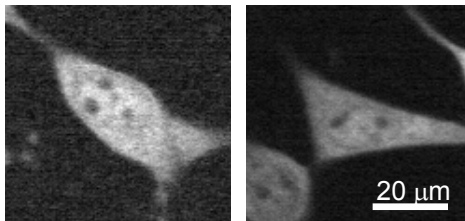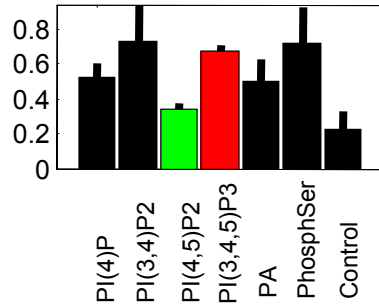

121) SOS1-PH (NM\_009231)

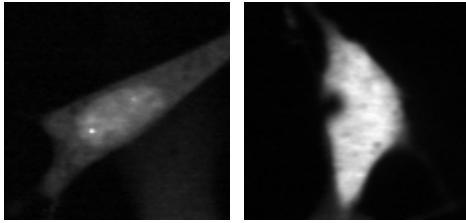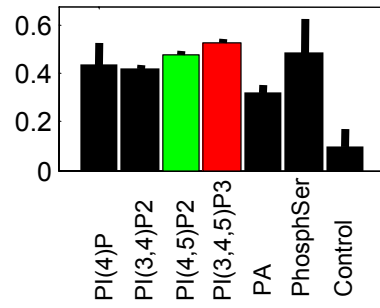

122) SOS2-PH (XM\_987825)

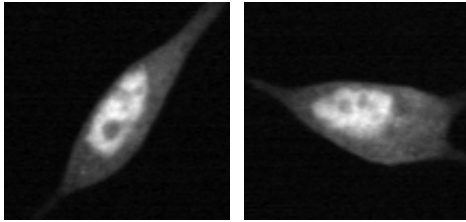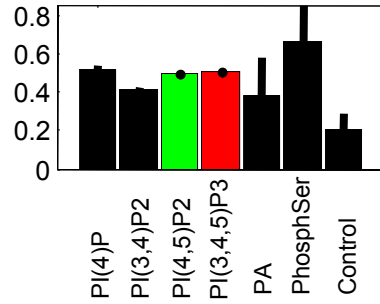

123) SPNB2-PH (NM\_175836)

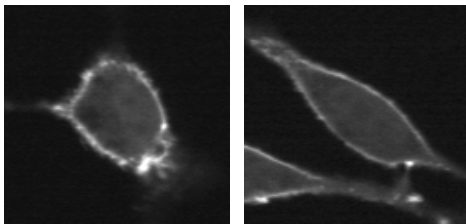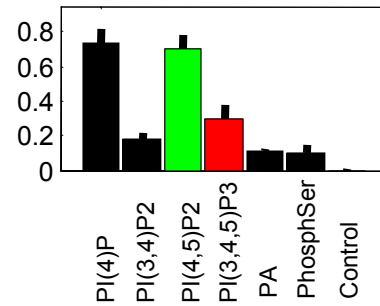

124) SWAP70-PH (NM\_009302)

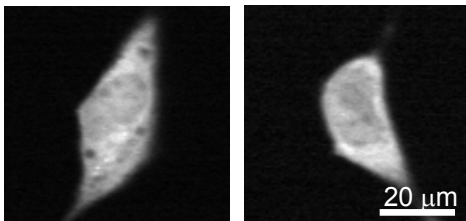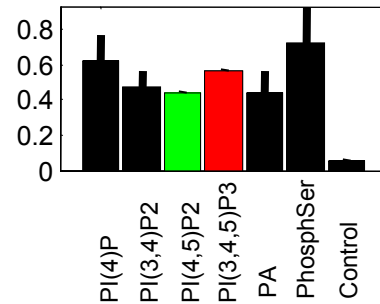

**125) TEC-PH (AK139329, BC037071)**

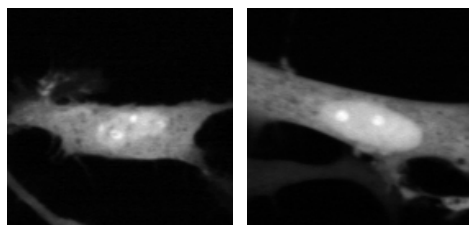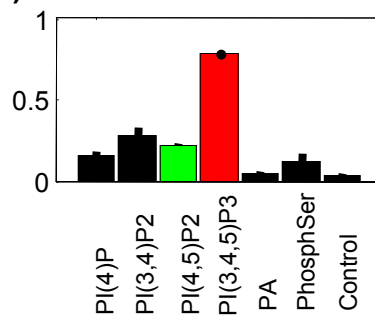

**126) TIAM1-PH (NM\_009384)**

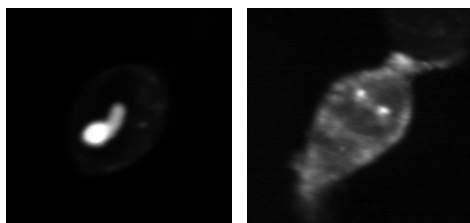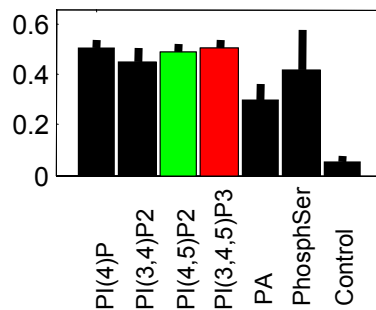

**127) TIAM1-PH2 (NM\_009384)**

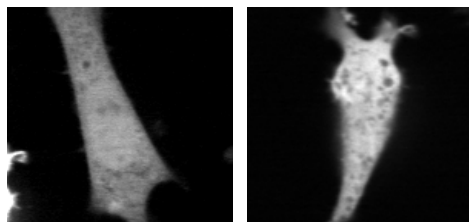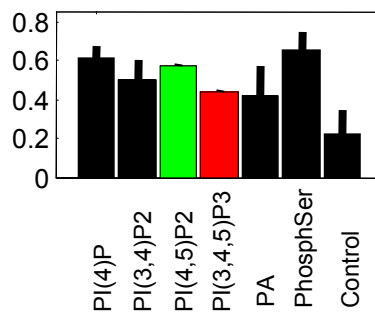

**128) TIAM2-PH (NM\_011878)**

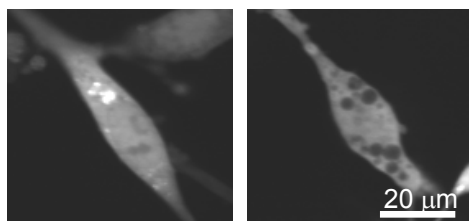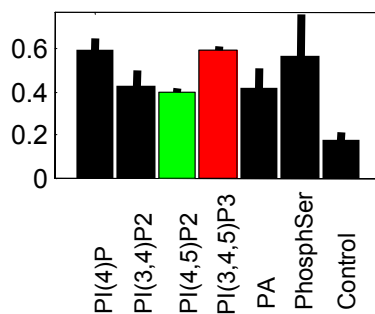



129) TRIOBP-PH (NM\_001039156)

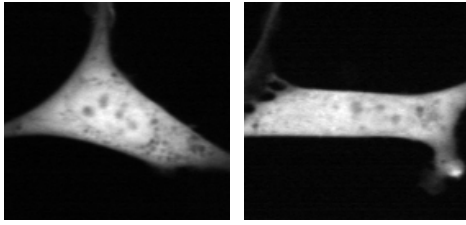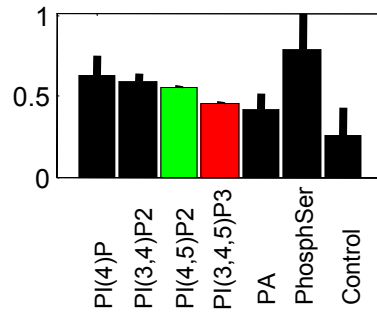

130) VAV1-PH (NM\_011691)

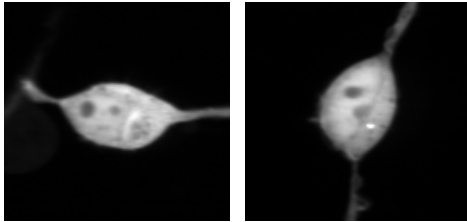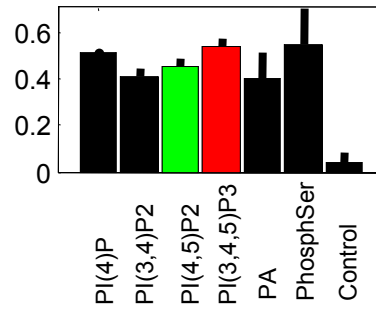

131) VAV2-PH (NM\_009500)

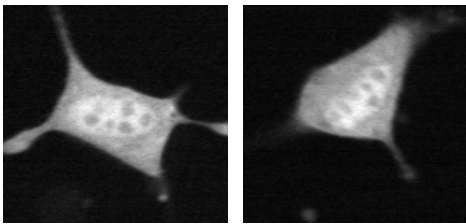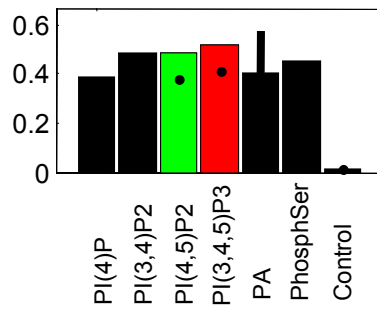

132) VAV2-PHB (NM\_009500)

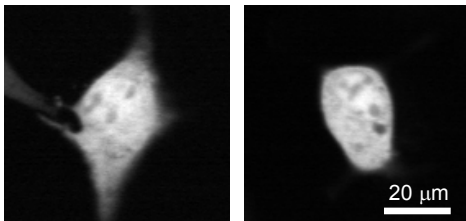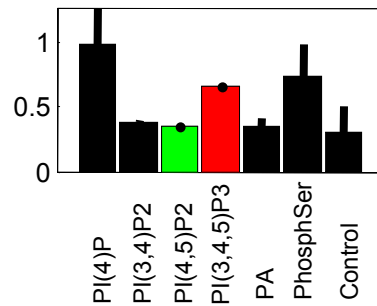

### 133) VAV3-PH (NM\_020505)

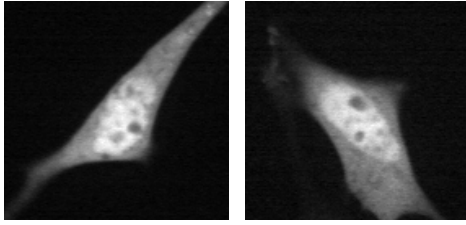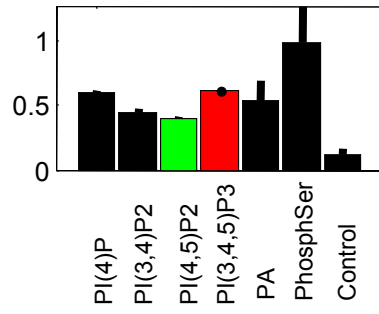

### 134) VEPH1-PH (NM\_145820)

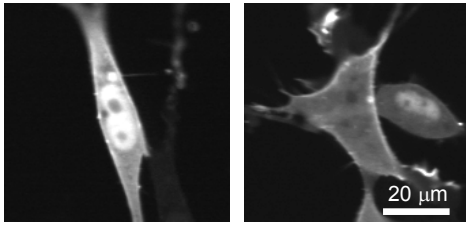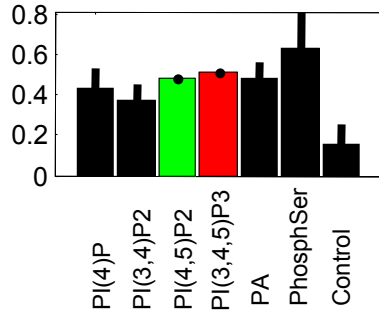

Supplement: NIHMS180892-supplement-Supp_3.pdf [file NIHMS180892-supplement-Supp_3.pdf]
