# Supplementary material
Source: PubMed Central journal article supplement (PMC3523718)

hPSCD4-PH  
NM\_013385.2

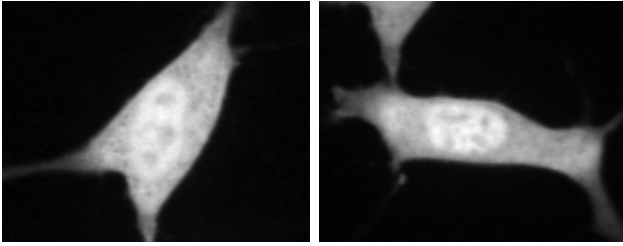

hPHLDB2-PH  
NM\_145753.1

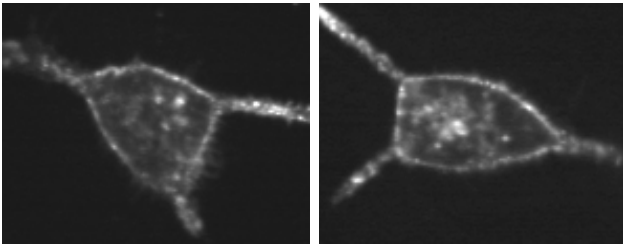

hGAB3-PH  
NM\_080612.2

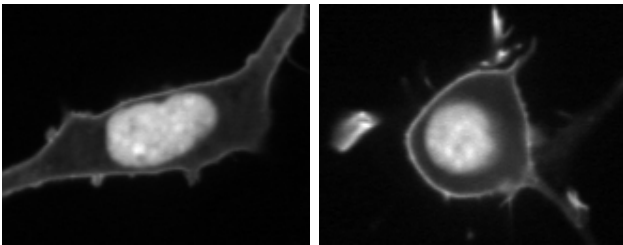

hARHGAP25-PH  
NM\_001007231.1

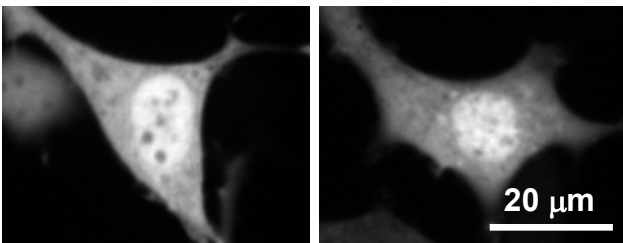

hLOC653583-PH  
XM\_928224.2

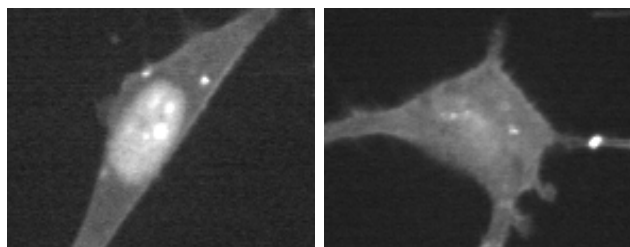

hOSBPL6-PH  
NM\_145739.1

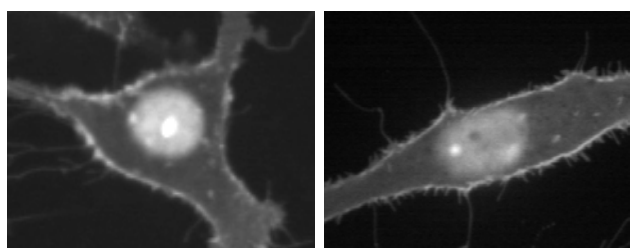

hRASA1-PH  
NM\_002890.1

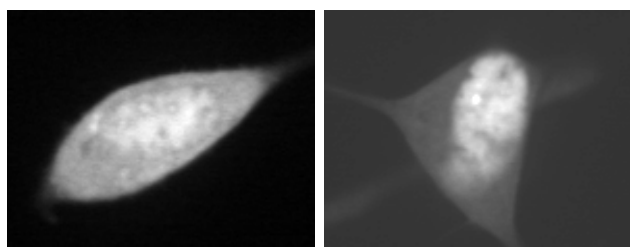

hSBF1-PH  
NM\_002972.1

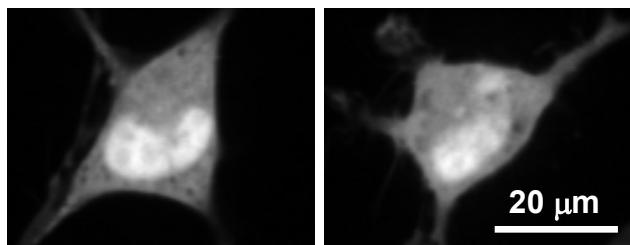

hSBF2-PH  
NM\_030962.2

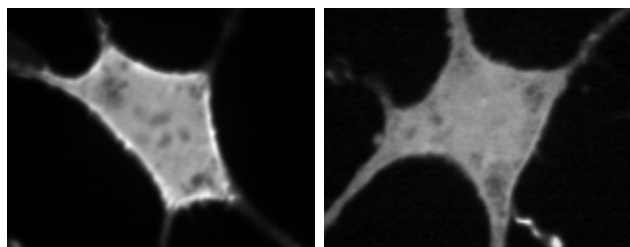

hPLEKHH1-PH  
NM\_020715.2

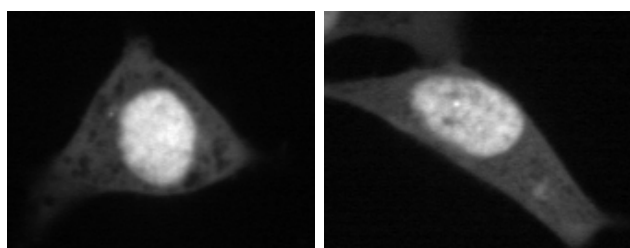

hDEF6-PH  
NM\_022047.2

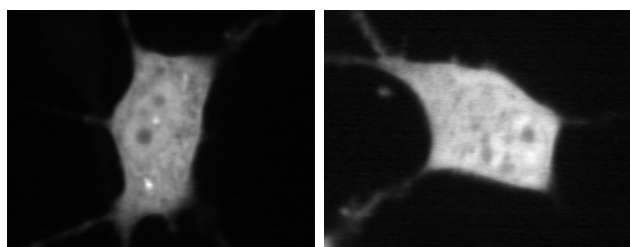

hCENTD2-PH  
NM\_001040118.1

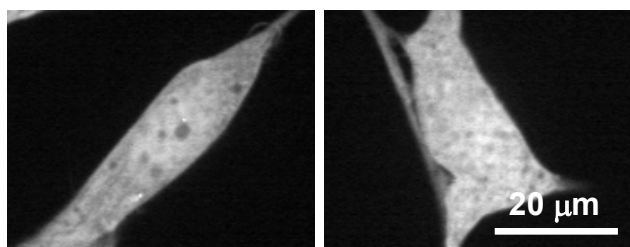

hOSBPL1A-PH

NM\_133268.1

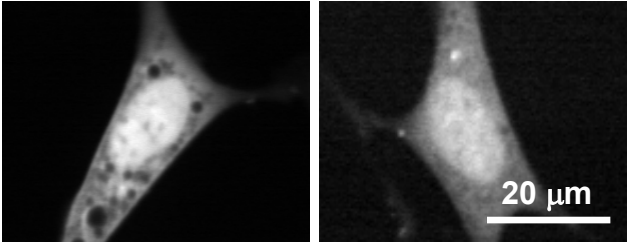

pCSX2-PH  
NM\_001021804

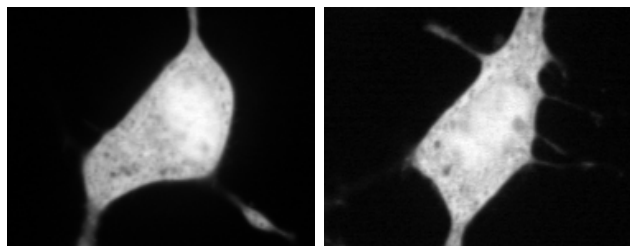

pKSG1-PH  
NM\_001023433

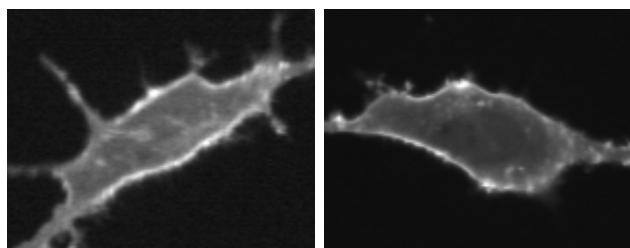

pRGA2-PH  
NM\_001019576

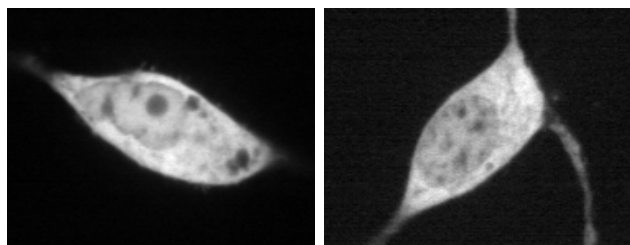

pSPAC11E3.11c-PH  
NM\_001020367

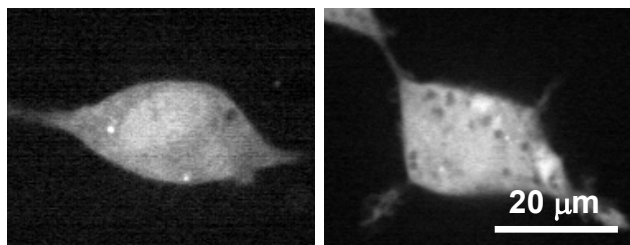

pSPAC26A3.10-PH  
NM\_001019577

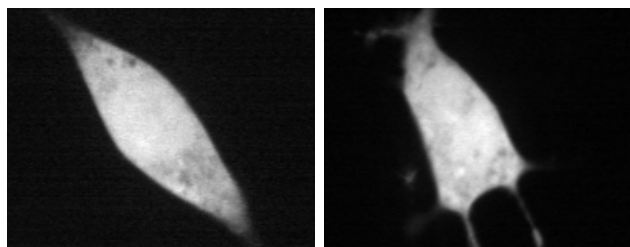

pSPAPYUG7.03c-PH  
NM\_001020131

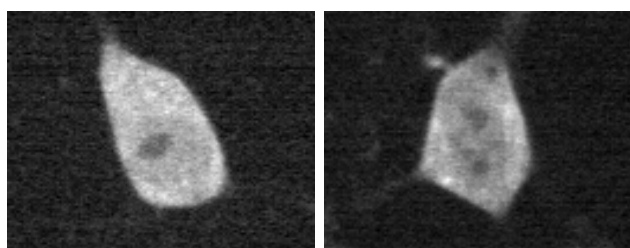

pSPCPB16A4.02c-PH  
NM\_001023017

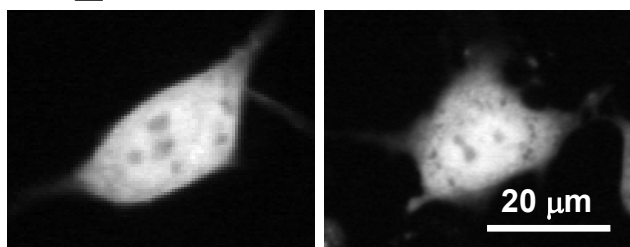

yATG26-PH  
NC\_001144

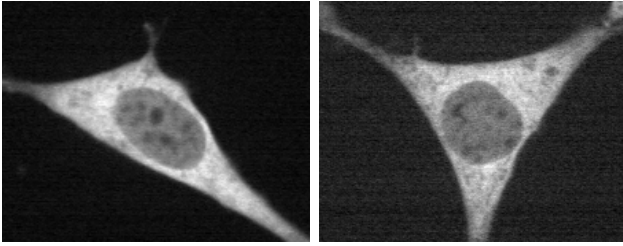

yBOI1-PH  
NC\_001134

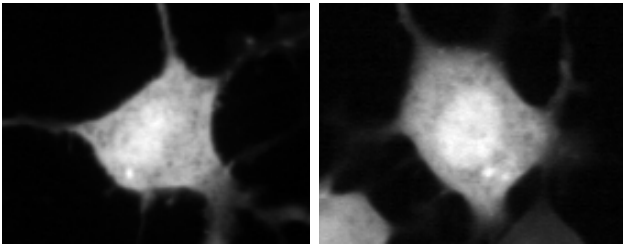

yBUD4-PH  
NC\_001142

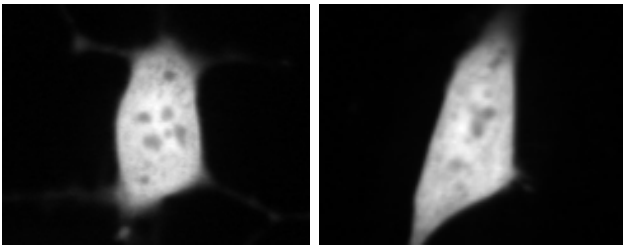

ySLM2-PH  
NC\_001146

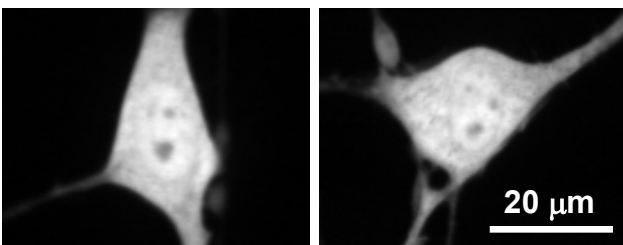

cATK1-PH  
NM\_001028476

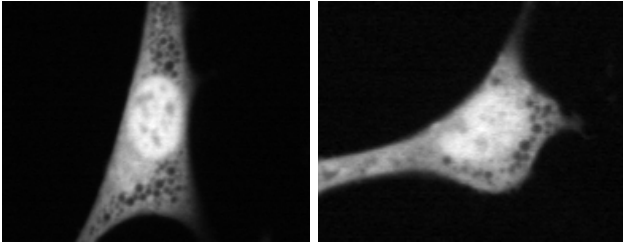

cATK2-PH  
NM\_001029441

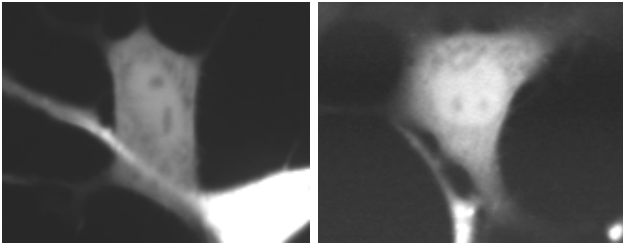

cLet502-PH  
NM\_059039

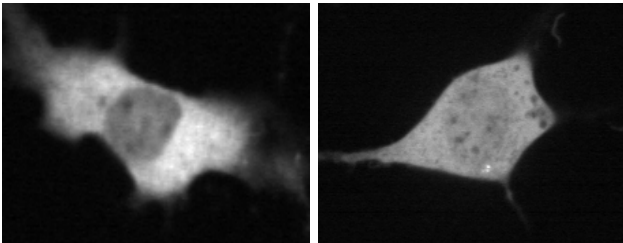

cSec7-PH  
NM\_066363

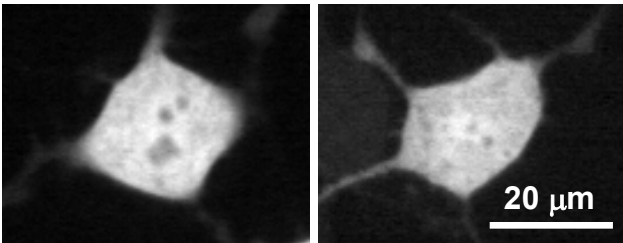



cOBR-1-PH  
NM\_067047

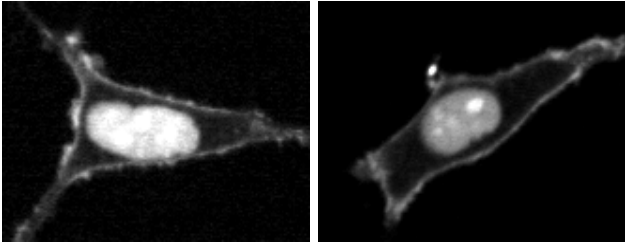

cF59A6.5-PH  
NM\_062520

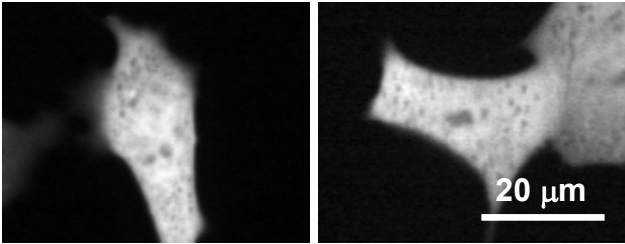

dAKT1-PH  
NM\_169705

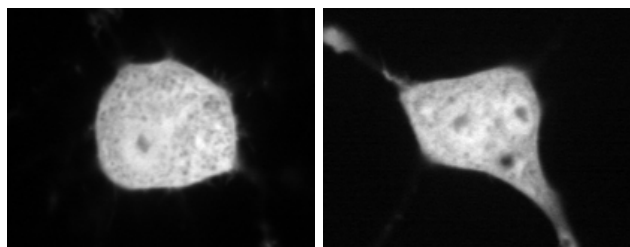

dBtk29A-PHA  
NM\_164804

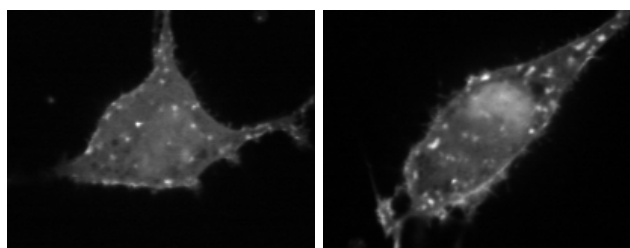

dCG5004-PH  
NM\_132967

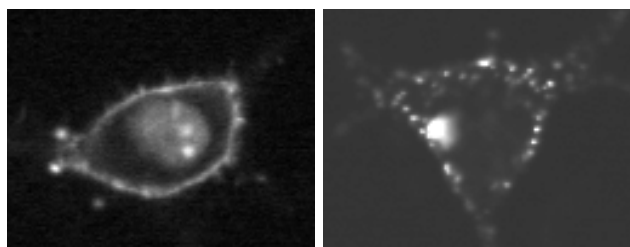

dCG12467-PH  
NM\_058041

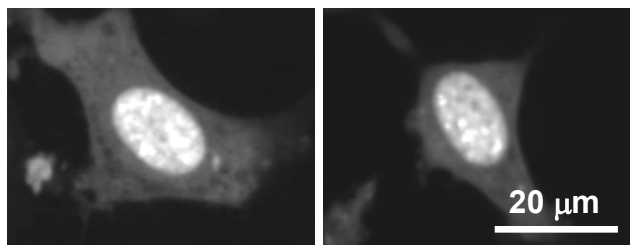

dCG14366-PH  
NM\_142053

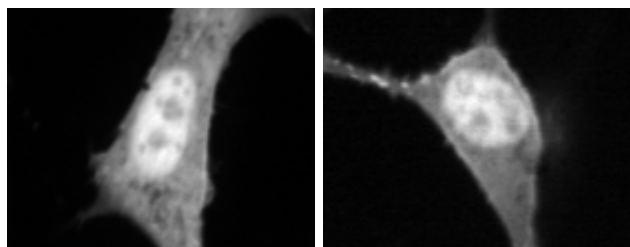

dGrp1-PH  
NM\_001042910

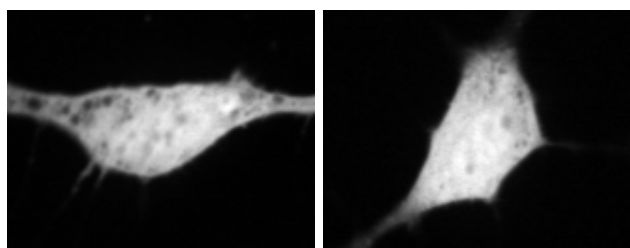

dVap-PH  
NM\_206759

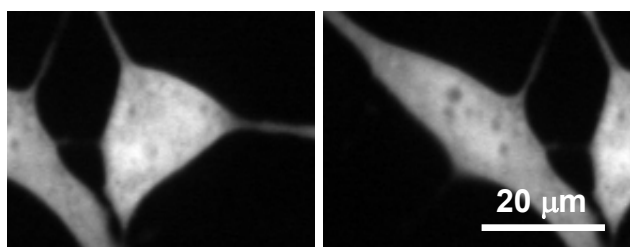

Supplement: NIHMS180892-supplement-Supp_5.pdf [file NIHMS180892-supplement-Supp_5.pdf]
