# Supplementary material
Source: PubMed Central journal article supplement (PMC3523718)

**Human PSCD4-PH (NM\_013385)**

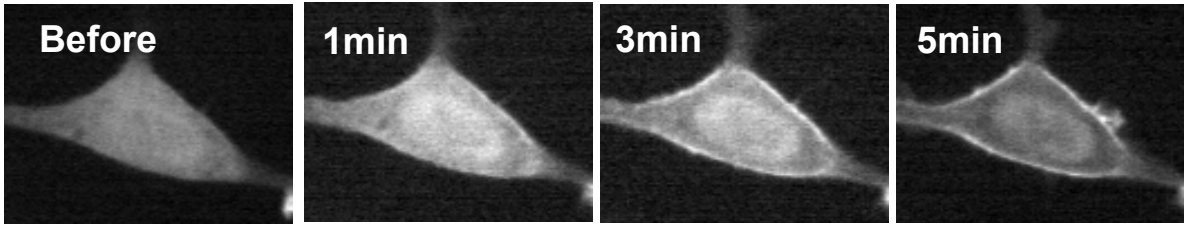

**Human OSBPL6-PH (NM\_145739)**

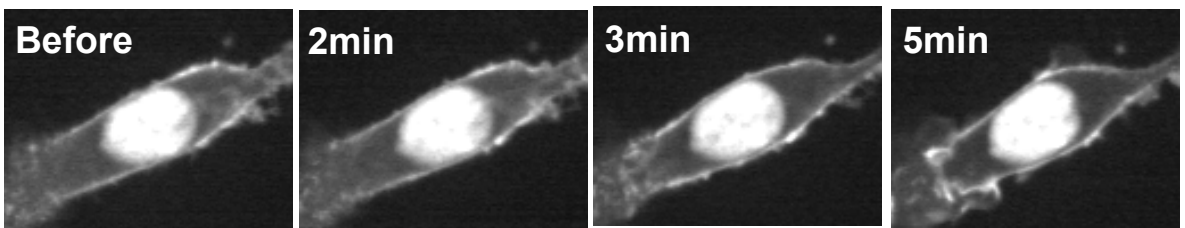

**Human LOC653583-PH (XM\_928224)**

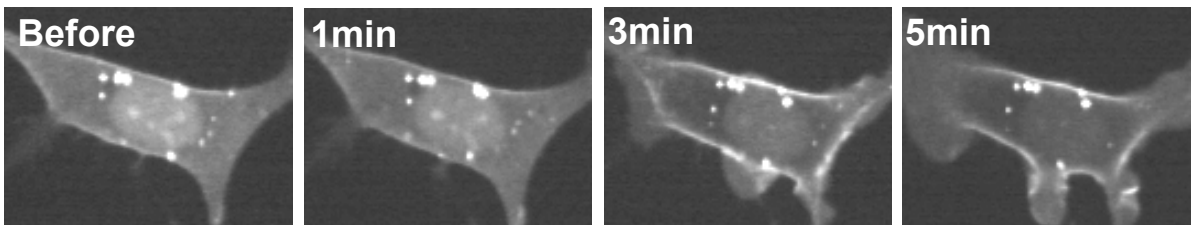

**Human PHLDB2-PH (NM\_145753)**

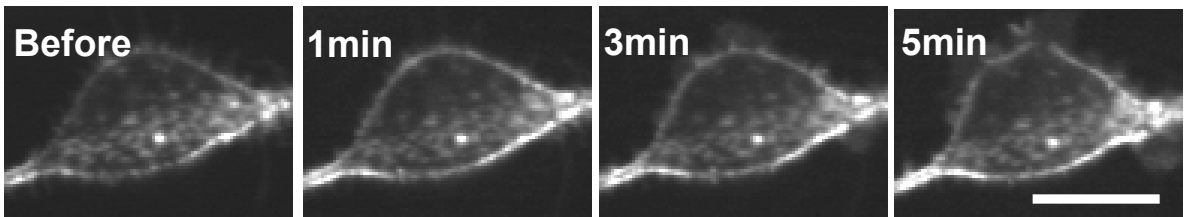

**Human GAB3-PH (NM\_080612)**

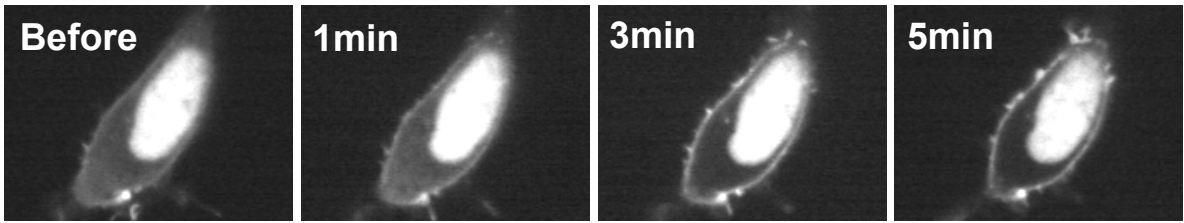

**Human SBF1-PH (NM\_002972)**

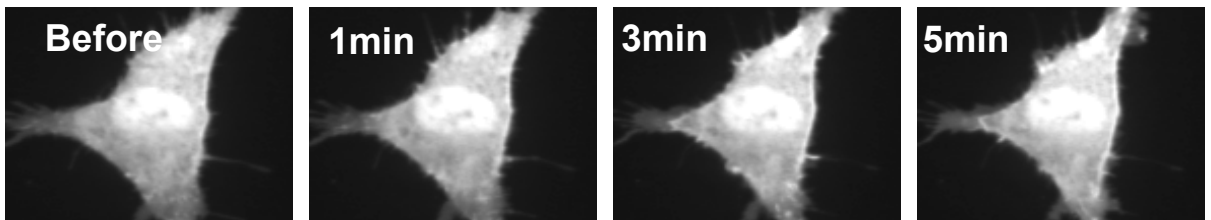

**Mouse Plek-PH (NM\_019549)**

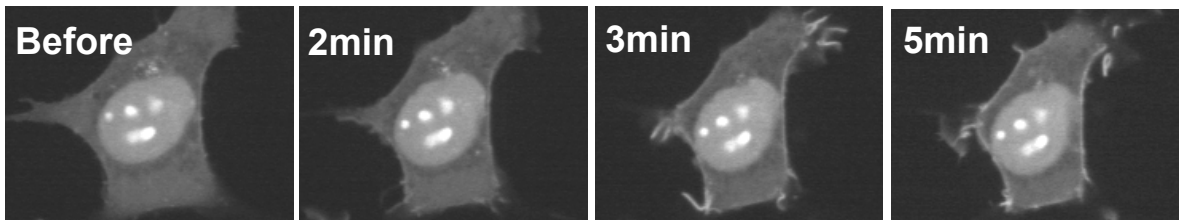

**Mouse RASA3-PH (NM\_009025)**

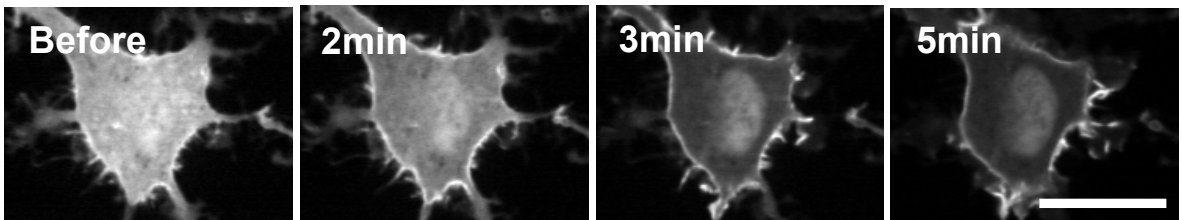

**A**

**SH3BP2-PH**

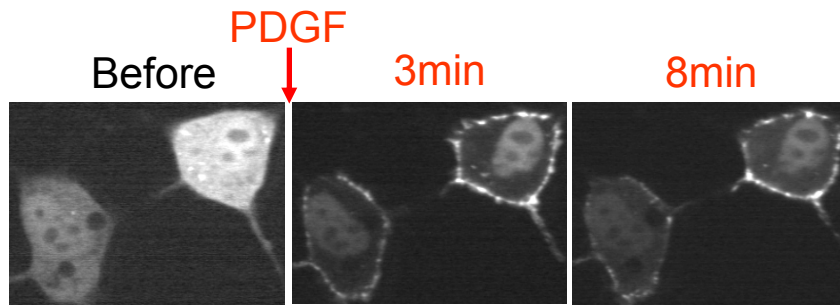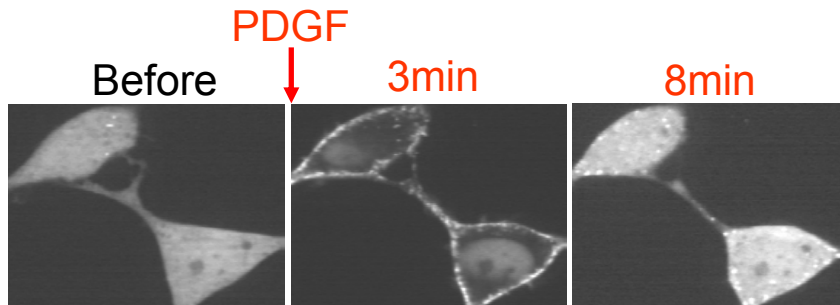

5min  
LY294002

**B**

**AKT2-PH**

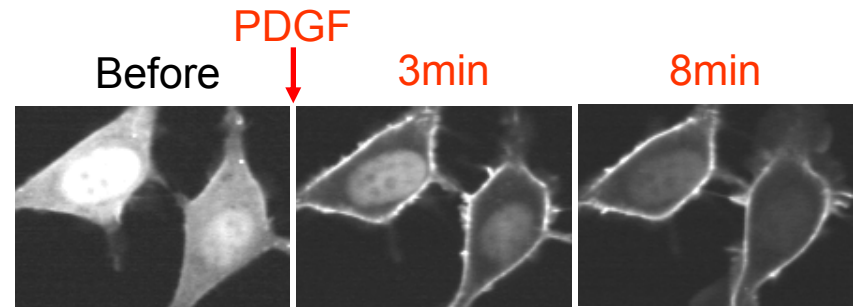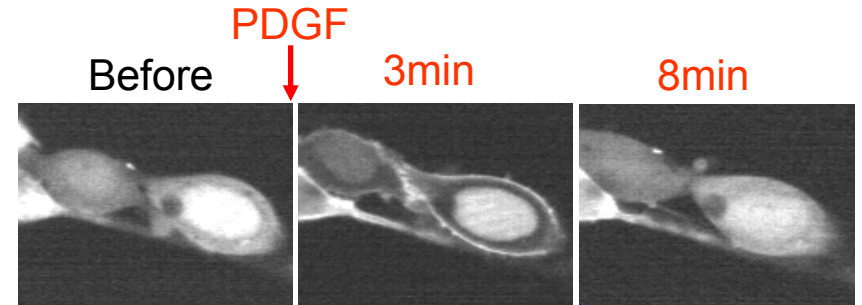

5min  
LY294002

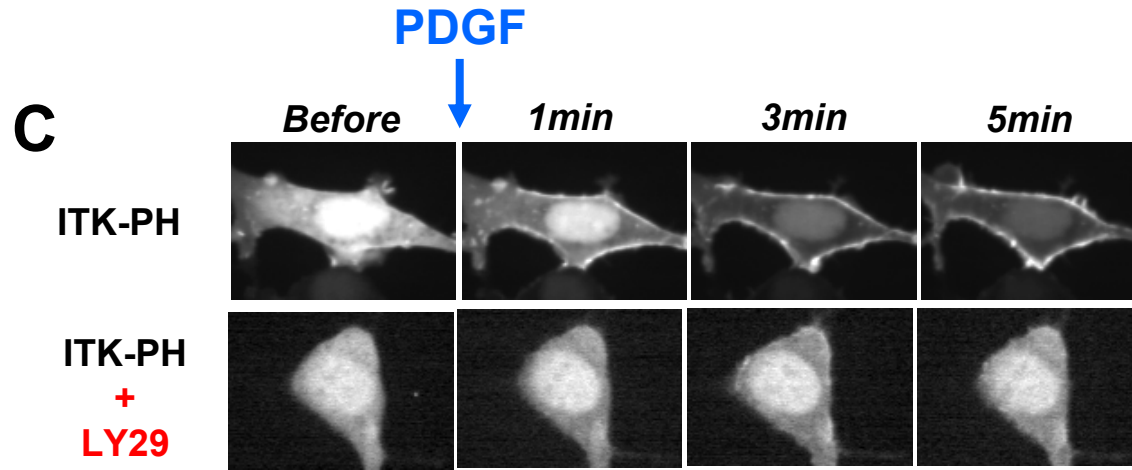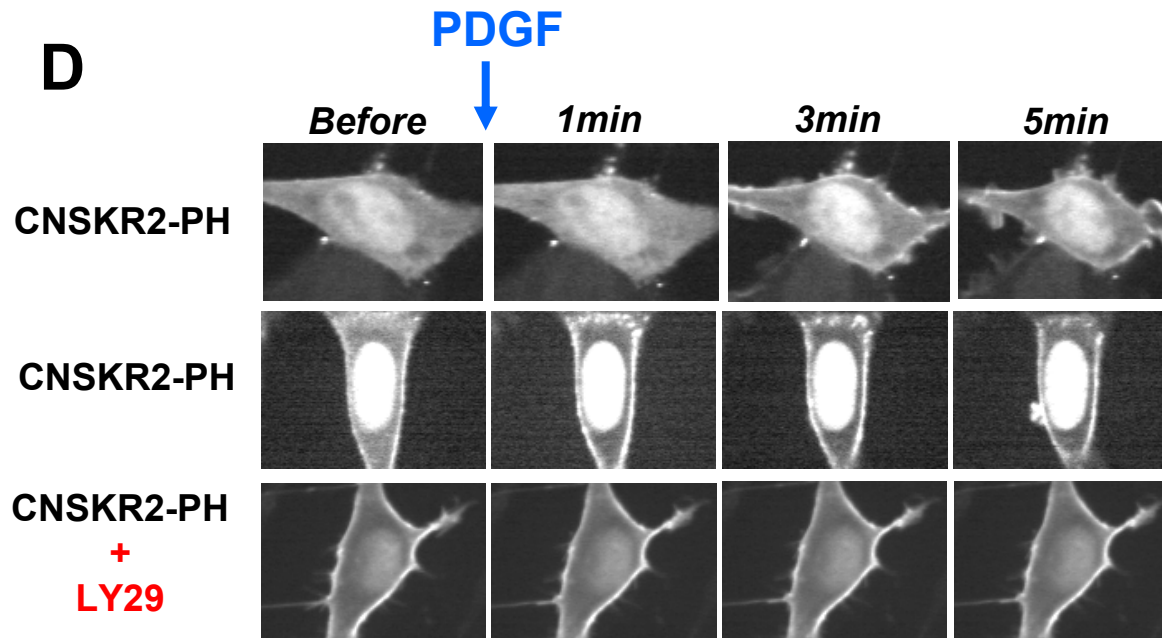

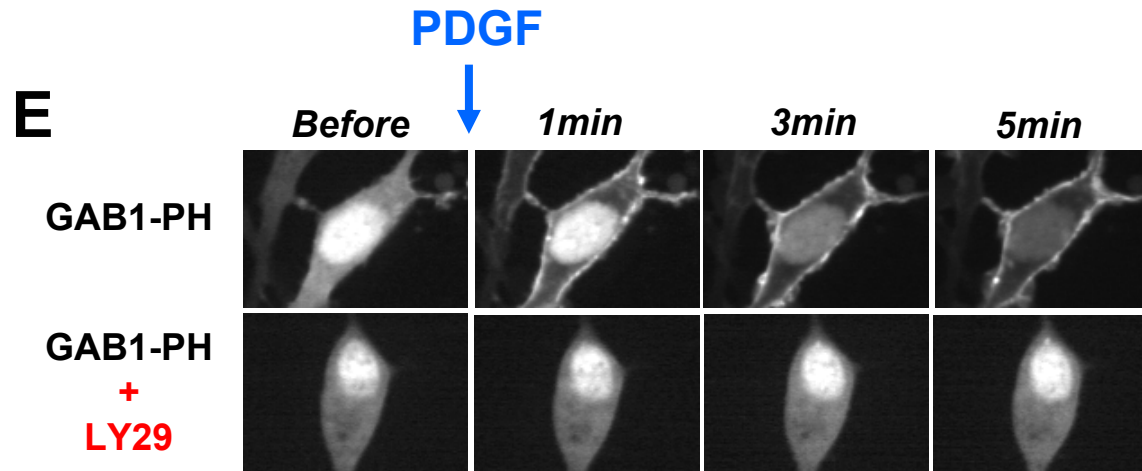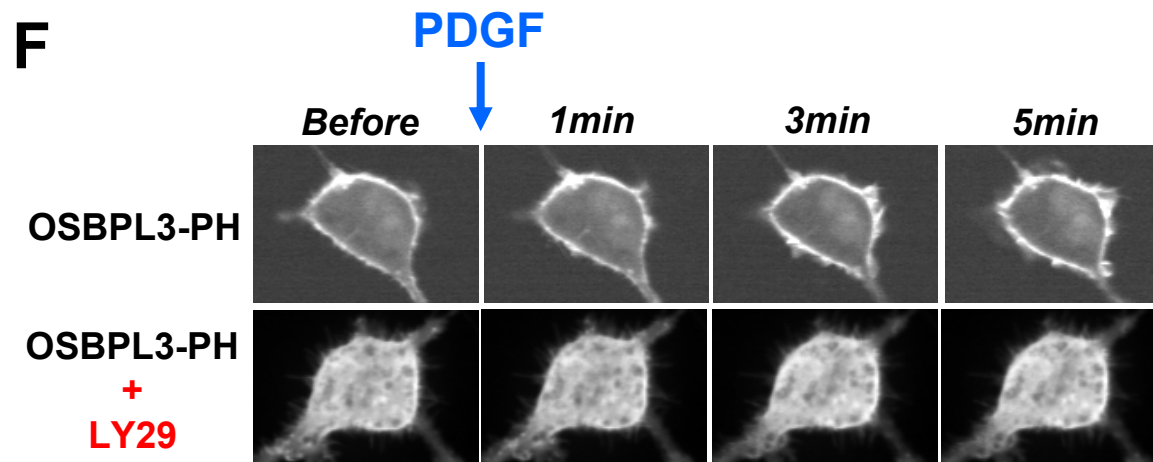

Supp. Fig. 10 Park et al.

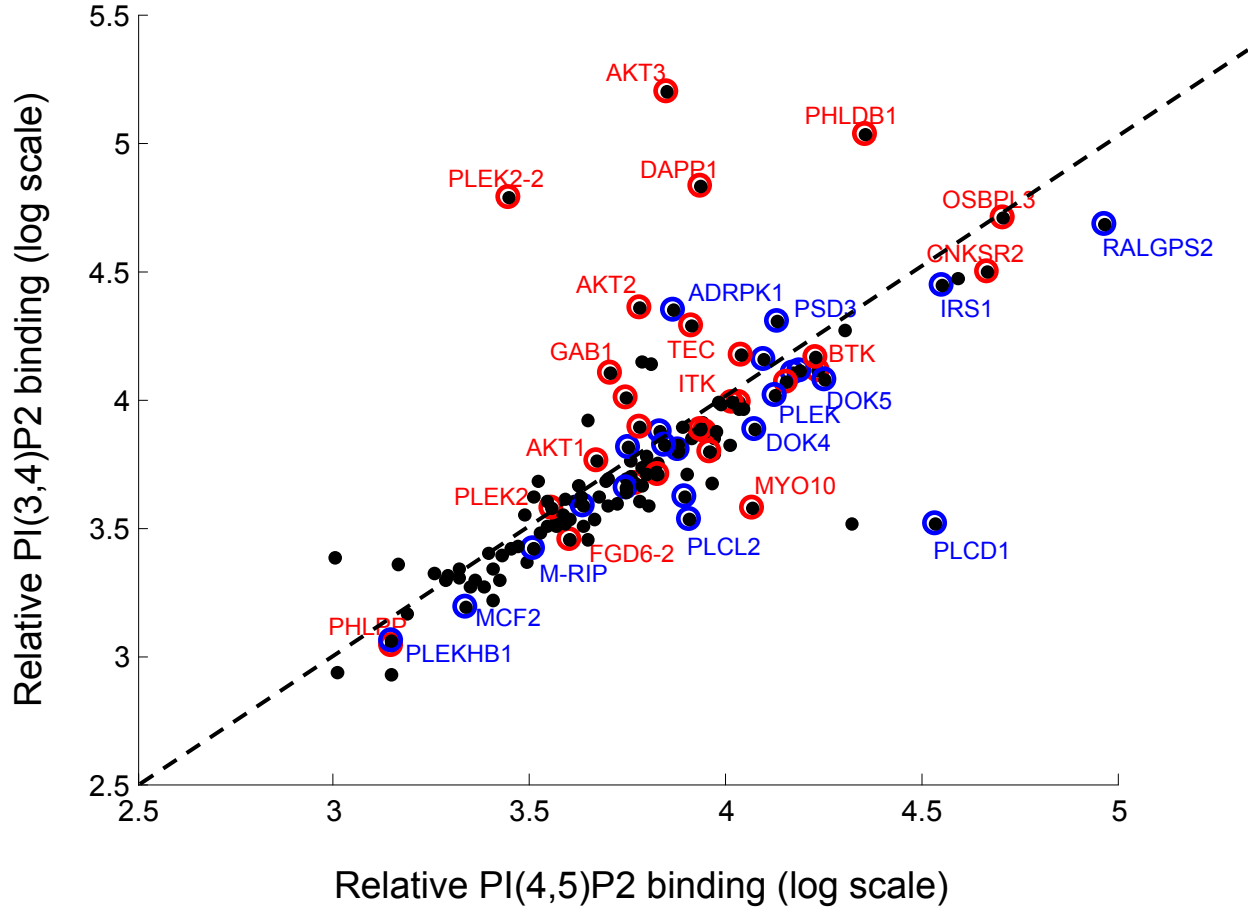

Supplement: NIHMS180892-supplement-Supp_6.pdf [file NIHMS180892-supplement-Supp_6.pdf]
