# Supplementary material
Source: PubMed Central journal article supplement (PMC3523718)
Supplement: NIHMS180892-supplement-8.pdf [file NIHMS180892-supplement-8.pdf]

Type of file: table

Label: Table 1

Filename: mmc7.xls

**Supplementary Table 1, Park et al.****Mouse PH-domains that translocated in response to PDGF stimulation in NIH3T3 cel**

| <b>#</b> | <b>Name of construct</b> | <b>NM or XM #</b>    | <b>Alternative names</b> |
|----------|--------------------------|----------------------|--------------------------|
| 1        | Akap13-PH                | XM_907140, XM_133543 |                          |
| 2        | AKT1-PH                  | NM_009652            | PKB; PKBalpha            |
| 3        | AKT2-PH                  | NM_007434            | PKBbeta                  |
| 4        | AKT3-PH                  | NM_011785            | PKBgamma                 |
| 5        | BTK-PH                   | NM_013482            |                          |
| 6        | CNKSR2-PH                | NM_177751            | Cnk2                     |
| 7        | DAPP1-PH                 | NM_011932            | Bam32                    |
| 8        | FGD6-PH2                 | NM_053072            | ETOHD4                   |
| 9        | FGD6-PHT                 | NM_053072            | ETOHD4                   |
| 10       | Gab1-PH                  | NM_021356            |                          |
| 11       | Gab2-PH                  | NM_010248            |                          |
| 12       | ITK-PH                   | NM_010583            |                          |
| 13       | Myo10-PH                 | NM_019472            |                          |
| 14       | Myo10-PHT                | NM_019472            |                          |
| 15       | Osbpl3-PH                | NM_027881            |                          |
| 16       | Osbpl7-PH                | XM_193637            |                          |
| 17       | PDPK1-PH                 | NM_002613            | PDK1                     |
| 18       | PHLDB1-PH                | NM_153537            | L15alpha, L15a           |
| 19       | PHLPP-PH                 | XM_984950            |                          |

|    |             |                     |            |
|----|-------------|---------------------|------------|
| 20 | Plek2-PH    | NM_013738           |            |
| 21 | Plek2-PH2   | NM_013738           |            |
| 22 | PLEKHA1-PH  | NM_133942           | TAPP1      |
| 23 | Plekha2-PH2 | NM_031257           |            |
| 24 | PSCD1-PH    | NM_011180           | CTH1       |
| 25 | PSCD2-PH    | NM_011181           | ARNO, CTH2 |
| 26 | PSCD3-PH    | NM_011182           | GRP1, CTH3 |
| 27 | Rasa2-PH    | NM_053268           |            |
| 28 | SH3bp2-PH   | NM_011893           |            |
| 29 | TEC-PH      | AK139329 (BC037071) |            |

lls

| Current alias | n  | CNI         | ORF       | AFCSID  | NM_number |
|---------------|----|-------------|-----------|---------|-----------|
| 1 F024        | E1 | VAV2-PH1A   | GGACAAGG  | A002361 | NM_009500 |
| 2 F024        | E2 | VAV2-PH1B   | GGACAAGG  | A002361 | NM_009500 |
| 3 F026        | E1 | VAV3-PH1A   | AGATAATG  |         | NM_020505 |
| 4 F028        | E1 | VAV1-PH1A   | GGAGAACC  |         | NM_011691 |
| 5 F038        | E1 | GAB1-PH1A   | CGGCGAAG  |         | NM_021356 |
| 6 F041        | E1 | GAB2-PH1A   | CGGCGGC   |         | NM_010248 |
| 7 F058        | E1 | DOK1-PH1A   | GGCTGTGA  |         | NM_010070 |
| 8 F066        | E1 | CTH1-PH1A   | ATTCATCG  |         | NM_011180 |
| 9 F082        | E1 | BAM32-PH1A  | GCCTTTGA  |         | NM_011932 |
| 10 H001       | E1 | 3BP2-PH1A   | TGAGGAGA  |         | NM_011893 |
| 11 H007       | E1 | CTH2-PH1A   | GGAGGATG  | A000330 | NM_011181 |
| 12 H009       | E1 | CTH3-PH1A   | AGAAGACG  | A000332 | NM_011182 |
| 13 H010       | E1 | DBS-PH1A    | TCTCATCG  | A000755 | NM_178076 |
| 14 H011       | E1 | DNM1-PH1A   | AGGGAACC  | A000794 | NM_010065 |
| 15 H012       | E1 | DNM2-PH1A   | CCAGATTC  | A000795 | NM_007871 |
| 16 H013       | E1 | FGD1A-PH1A  | GAAAATGG  | A000912 | NM_008001 |
| 17 H013       | G1 | FGD1B-PH2A  | GAGCAGTC  | A000912 | NM_008001 |
| 18 H014       | E1 | RASGRF1-P1  | AGCCATCC  | A002032 | NM_011245 |
| 19 H014       | G1 | RASGRF1-P1  | TGAAACCG  | A002032 | NM_011245 |
| 20 H015       | E1 | GRB7-PH1A   | CTTCGCCA  | A000071 | NM_010346 |
| 21 H016       | E1 | GRB10-PH1A  | AGAAAGAA  | A000064 | NM_010345 |
| 22 H017       | E1 | IRS1-PH1A   | CCCCCCGG  | A001281 | NM_010570 |
| 23 H019       | E1 | ITK-PH1A    | CTTCATCC  | A000832 | NM_010583 |
| 24 H020       | E1 | KIF1A-PH1A  | CCGGCCC   |         | NM_008440 |
| 25 H021       | E1 | KIF1B-PH1A  | CAACTCTC  |         | NM_207682 |
| 26 H024       | E1 | LFC -PH1A   | GAAGGAGT  |         | NM_008487 |
| 27 H025       | E1 | SNTB1-PH1A  | GACCCGTG  | A002246 | NM_016667 |
| 28 H026       | E1 | SH2B-PH1A   | GGGTGGT   | A002149 | NM_011363 |
| 29 H027       | E1 | SWAP-70-PH  | AATAAACTT | A002961 | NM_009302 |
| 30 H029       | E1 | FGD2-PH1A   | CCAGAGAG  | A003323 | NM_013710 |
| 31 H030       | E1 | FGD3-PH1A   | TGCCCCAG  | A003324 | NM_015759 |
| 32 H034       | E1 | RASGRF2-P1  | GAGCGTGC  | A002441 | NM_009027 |
| 33 H034       | G1 | RASGRF2-P1  | TGACACCG  | A002441 | NM_009027 |
| 34 H037       | E1 | Cool1-PH1A  | GAGGAAGG  |         | NM_017402 |
| 35 H038       | E1 | PLD1-PH1A   | AGAGCAGT  | A001811 | NM_008875 |
| 36 H040       | E1 | SNTA1-PH1A  | TGCAGCGG  | A002245 | NM_009228 |
| 37 H041       | E1 | SNTB2-PH1A  | TAGCAGGA  | A000691 | NM_009229 |
| 38 H042       | E1 | CADPS-PH1A  | AGACAAGG  |         | NM_012061 |
| 39 H043       | E1 | OPHN1-PH1A  | GACTGTGG  |         | NM_052976 |
| 40 H044       | E1 | ARHGEF3-P1  | GGAATCGG  |         | NM_027871 |
| 41 H045       | E1 | FGDB-PH1A   | AATGCACA  | A000912 | NM_008001 |
| 42 H046       | E1 | DOK4-PH1A   | CAATTTCA  | A000053 | NM_053246 |
| 43 H048       | E1 | H048-PH1A   | CCACTTGG  |         | NM_024413 |
| 44 H050       | E1 | PSGAP-PH1A  | AGGCCACG  |         | NM_030113 |
| 45 H051       | E1 | OST-PH1A    | AACTACTA  | A000754 | NM_133197 |
| 46 H052       | E1 | OSBPL5-PH1  | TGACCCCC  |         | NM_024289 |
| 47 H053       | E1 | GEFT -PH1A  | CCTGGGGA  |         | NM_028027 |
| 48 H054       | E1 | Capri -PH1A | GATGGAAC  |         | NM_133914 |
| 49 H055       | E1 | VEPHA-PH1A  | GCAGCTTC  |         | NM_145820 |
| 50 H056       | E1 | H056-PH1A   | AGCATCCG  |         | XM_885890 |

|     |      |    |               |           |         |                                  |
|-----|------|----|---------------|-----------|---------|----------------------------------|
| 51  | H056 | G1 | H056-PH1A     | CCAGAACC  |         | XM_885890                        |
| 52  | H057 | E1 | GNRPX-PH1A    | CAACGAGA  |         | NM_023900                        |
| 53  | H060 | E1 | H060-PH1A     | CATTGATG  |         | NM_028707                        |
| 54  | H061 | E1 | ETOHD4-PH1A   | GCAAGGG   | A003325 | NM_053072                        |
| 55  | H061 | G1 | ETOHD4-PH2A   | CCAGCTGT  | A003325 | NM_053072                        |
| 56  | H065 | E1 | OSBPL3-PH1A   | CGAGAAGA  |         | NM_027881                        |
| 57  | H067 | E1 | COL4BP-PH1A   | TAACCAGA  |         | NM_023420                        |
| 58  | H070 | E1 | PLEKHA3-PH1A  | GGTTCTGT  | A003308 | NM_031256                        |
| 59  | H071 | E1 | Plekha2-PH1A  | TGTGGATC  | A003307 | NM_031257                        |
| 60  | H071 | G1 | Plekha2-PH2A  | CGGTGGG   | A003307 | NM_031257                        |
| 61  | H074 | E1 | PLEK-PH1A     | AAAGCGGA  | A003310 | NM_019549                        |
| 62  | H074 | G1 | PLEK-PH2A     | CTTCTGTG  | A003310 | NM_019549                        |
| 63  | H075 | E1 | NGEF-PH1A     | GAGAGTGG  |         | NM_019867                        |
| 64  | H076 | E1 | APS-PH1A      | ATTCTGGC  | A000306 | NM_018825                        |
| 65  | H077 | E1 | TNFIDP-PH1A   | GAGCGGCT  |         | NM_023320                        |
| 66  | H078 | E1 | Myosin X-PH1A | CCTCAAGC  | A001583 | NM_019472                        |
| 67  | H078 | G1 | Myosin X-PH2A | AGAGGAGA  | A001583 | NM_019472                        |
| 68  | H080 | E1 | CENTB4-PH1A   | AAAATCCT  | A000344 | NM_010026                        |
| 69  | H086 | E1 | PLCL2-PH1A    | CCCCAGGG  |         | NM_013880                        |
| 70  | H088 | E1 | EVT2-PH1A     | CGTGAAGA  |         | NM_145516                        |
| 71  | H090 | E1 | RASGRF1B-PH1A | FAGCCATCC | A002032 | NM_001039655                     |
| 72  | H091 | E1 | TEC-PH1A      | CAACACTA  |         | AK139329 BC037071 There are only |
| 73  | H094 | E1 | PLEK2-PH1A    | CGGCGTGC  | A003311 | NM_013738                        |
| 74  | H094 | G1 | PLEK2-PH2A    | TCTGGATG  | A003311 | NM_013738                        |
| 75  | H101 | E1 | TIAM2-PH1A    | ACAGAACA  |         | NM_011878                        |
| 76  | H102 | E1 | ESE1-PH1A     | AGAGAAGG  | A000086 | NM_010587                        |
| 77  | H103 | E1 | ESE2-PH1A     | GGAGAAGG  | A000881 | NM_011365                        |
| 78  | H106 | E1 | NET1-PH1A     | GCTTCTAG  | A001630 | NM_019671                        |
| 79  | H109 | E1 | SKAP2-PH1A    | TGAATATG  | A002165 | NM_018773                        |
| 80  | H110 | E1 | RHOIP2-PH1A   | CGAATACG  | A002082 | NM_012026                        |
| 81  | H111 | E1 | RHOIP3-PH1A   | GGCCAAGG  |         | NM_201245                        |
| 82  | H111 | G1 | RHOIP3-PH2A   | TAGAAAGC  |         | NM_201245                        |
| 83  | H112 | E1 | RASA2-PH1A    | GTCCAGAA  |         | NM_053268                        |
| 84  | H113 | E1 | RASA3-PH1A    | CAAGTCTG  | A001026 | NM_009025                        |
| 85  | H114 | E1 | Rasa1-PH1A    | GCAGCTGG  | A002029 | NM_013832                        |
| 86  | H115 | E1 | SOS1-PH1A     | CAAAAGTC  | A002030 | NM_009231                        |
| 87  | H116 | E1 | SPNB2-PH1A    | CATGGAAA  | A002854 | NM_175836                        |
| 88  | H118 | E1 | Tiam1-PH1A    | GGGTGTAC  |         | NM_009384                        |
| 89  | H118 | G1 | Tiam1-PH2A    | ACACTACC  |         | NM_009384                        |
| 90  | H124 | E1 | SOS2-PH1A     | GCAGCACT  |         | XM_987825                        |
| 91  | H128 | E1 | FARP1-PH1A    | GGAGATCA  |         | NM_134082                        |
| 92  | H128 | G1 | FARP1-PH2A    | CCCGGATG  |         | NM_134082                        |
| 93  | H129 | E1 | AMYL3-PH1A    | GTTTAAAA  |         | NM_019456                        |
| 94  | H130 | E1 | TARA1-PH1A    | GAAAAAGC  |         | NM_001039156                     |
| 95  | H132 | E1 | DOK5-PH1A     | GACATAGT  |         | NM_029761                        |
| 96  | H133 | E1 | AFAPL-PH1A    | ATATGATG  |         | NM_027373                        |
| 97  | H134 | E1 | PLCD4-PH1A    | TCAGATTC  |         | NM_148937                        |
| 98  | H147 | E1 | GRB14-PH1A    | TGAATTTTT |         | NM_016719                        |
| 99  | K054 | E1 | PKD1-PH1A     | TGGAGGTG  | A001930 | NM_008858                        |
| 100 | K058 | E1 | AKT2-PH1A     | GGTATCTG  | A000250 | NM_007434                        |
| 101 | K061 | E1 | AKT3-PH1A     | TGTTACCA  | A000251 | NM_011785                        |

|     |      |    |                 |          |         |           |
|-----|------|----|-----------------|----------|---------|-----------|
| 102 | K093 | E1 | Grk2-PH1A       | CTCTGAGC |         | NM_130863 |
| 103 | K099 | E1 | AKT1-PH1A       | CGTAGCCA | A000249 | NM_009652 |
| 104 | K113 | E1 | CRIK-PH1A       | AGCTGAAT | A000662 | NM_007708 |
| 105 | S005 | E1 | PLCDL-PH1A      | CGGTCCG  |         | NM_019676 |
| 106 | S008 | E1 | PI3-kinase-PH1A | CTTTATCC |         | NM_008876 |
| 107 | S033 | E1 | BTK-PH1A        | AGTGATAC |         | NM_013482 |
| 108 | H032 | E1 | ROCK1-PH1A      | AAATGAAC |         | NM_005406 |





AK and BC, not NM

| construct name           | filename for PIP strip | PI(3,4)P2 | PI(3,5)P2 | PI(4,5)P2 |
|--------------------------|------------------------|-----------|-----------|-----------|
| pEX_EF1_YFP-AKT2-PH1A    | PIP05062002            | 44.675    | 17.024    | 15.805    |
| pEX_EF1_YFP-SH3bp2-PH1A  | PIP05062001            | 29.901    | 13.352    | 14.374    |
| pEX_EF1_YFP-LL5I-PH1A    | PIP05071320            | 135.2068  | 41.294    | 68.972    |
| pEX_EF1_YFP-ITK-PH1A     |                        | 23.6613   | 17.7206   | 26.15123  |
| pEX_EF1_YFP-Gab1-PH1A    | ETG03101402            | 48.4715   | 17.132    | 21.694    |
| pEX_EF1_YFP-Gab2-PH1A    | ETG03101403            | 65.3202   | 29.152    | 38.199    |
| pEX_EF1_YFP-AKT1-PH1A    | PIP05062023            | 14.9955   | 14.4439   | 16.2155   |
| pEX_EF1_YFP-Bam32-PH1A   | PIP05070517            | 98.7099   | 12.678    | 13.434    |
| pEX_EF1_YFP-AKT3-PH1A    | PIP05062003            | 156.982   | 12.87     | 37.538    |
| pEX_EF1_YFP-Akap13-PH1A  | PIP05062725            | 0.141     | 2.826     | 1.58      |
| pEX_EF1_YFP-TEC-PH1A     |                        | 45.86615  | 14.985    | 30.7655   |
| pEX_EF1_YFP-CTH3-PH1A    |                        | 19.07994  | 15.78294  | 40.1808   |
| pEX_EF1_YFP-ETOH4-PHTA   | PIP05071324            | 18.393    | 20.025    | 23.842    |
| pEX_EF1_YFP-BTK-PH1A     | PIP05062004            | 4.8301    | 10.2341   | 18.2073   |
| pEX_EF1_YFP-CTH2-PH1A    | PIP05062007            | 15.8233   | 18.6102   | 21.0506   |
| pEX_EF1_YFP-CTH1-PH1A    | PIP05062008            | 5.2215    | 7.6645    | 11.9847   |
| pEX_EF1_YFP-Ost-PH1A     | ETG03110410            | 9.612     | 14.969    | 13.882    |
| pEX_EF1_YFP-GEFT-PH1A    | ETG03110412            | 21.187    | 32.71     | 26.72     |
| pEX_EF1_YFP-H056-PH2A    | PIP05061313            | 13.989    | 16.995    | 16.739    |
| pEX_EF1_YFP-ETOHD4-PH1A  | ETG03110415            | 34.81     | 39.68     | 45.016    |
| pEX_EF1_YFP-ETOHD4-PH2A  | PIP05070505            | 8.4463    | 12.6733   | 14.7693   |
| pEX_EF1_YFP-Ngef-PH1A    | PIP05070513            | 8.126     | 10.644    | 11.316    |
| pEX_EF1_YFP-DBS-PH1A     | PIP05062010            | 14.9879   | 15.4225   | 16.1981   |
| pEX_EF1_YFP-IRS1-PH1A    | PIP05062019            | 26.529    | 22.105    | 40.1173   |
| pEX_EF1_YFP-Rasgrf2-PH2A | PIP05072014            | 3.057     | 4.158     | 4.577     |
| pEX_EF1_YFP-CADPS-PH1A   | PIP05072020            | 11.331    | 13.069    | 14.837    |
| pEX_EF1_YFP-RhoGEF3-PH1A | PIP05062714            | 1.152     | 4.089     | 1.778     |
| pEX_EF1_YFP-FGDB-PH1B    | PIP05062715            | 3.957     | 3.538     | 0.921     |
| pEX_EF1_YFP-DOK4-PH1A    | PIP05072012            | 29.238    | 40.9769   | 41.9422   |
| pEX_EF1_YFP-H048-PH1A    | PIP05062717            | 11.6437   | 12.4098   | 16.1038   |
| pEX_EF1_YFP-Grk2-PH1A    | PIP05062718            | 78.7049   | 6.804     | 13.684    |
| pEX_EF1_YFP-VephA-PH1A   | ETG03102805            | 39.183    | 35.228    | 38.718    |
| pEX_EF1_YFP-H056-PH1A    | ETG03110401            | 17.881    | 22.012    | 30.369    |
| pEX_EF1_YFP-Osbpl3-PH1A  | PIP05070506            | 82.1786   | 87.2819   | 84.4582   |
| pEX_EF1_YFP-Plekha2-PH2A | PIP05072024            | 53.005    | 22.501    | 26.145    |
| pEX_EF1_YFP-Plek-PH1A    | PIP05070511            | 29.801    | 21.759    | 41.213    |
| pEX_EF1_YFP-APS-PH1A     | PIP05061314            | 29.698    | 15.081    | 28.608    |
| pEX_EF1_YFP-TNFidp-PH1A  | PIP05070514            | 37.8347   | 39.7172   | 51.5705   |
| pEX_EF1_YFP-Myo10-PH1A   | PIP05061312            | 13.89     | 8.223     | 59.911    |
| pEX_EF1_YFP-CentB4-PH1A  | PIP05070516            | 12.1253   | 10.9806   | 12.7632   |
| pEX_EF1_YFP-Plcl2-PH1A   | PIP05070518            | 12.703    | 12.937    | 29.7647   |
| pEX_EF1_YFP-Dok1-PH1A    | ETG03101404            | 42.6731   | 27.575    | 33.726    |
| pEX_EF1_YFP-Plek2-PH1A   | ETG03111803            | 16.414    | 13.768    | 15.25     |
| pEX_EF1_YFP-PLCd1-PH1A   | PIP05071104            | 1.9552    | 1.9992    | 41.835    |
| pEX_EF1_YFP-Skap2-PH1A   | ETG03111809            | 18.409    | 15.298    | 23.061    |
| pEX_EF1_YFP-Rhoip3-PH1A  | PIP05071108            | 1.5083    | 1.7029    | 5.7885    |
| pEX_EF1_YFP-Rasa2-PH1A   |                        | 14.595    | 17.93     | 15.0705   |
| pEX_EF1_YFP-Rasa1-PH1A   | ETG03111815            | 22.974    | 28.169    | 29.055    |
| pEX_EF1_YFP-Spnb2-PH1A   | PIP05071114            | 15.263    | 19.316    | 55.935    |
| pEX_EF1_YFP-FARP1-PH1A   | PIP05071118            | 2.258     | 4.002     | 3.675     |

|                           |             |          |          |          |
|---------------------------|-------------|----------|----------|----------|
| pEX_EF1_YFP-FARP1-PH2A    | PIP05071119 | 4.69     | 6.652    | 5.774    |
| pEX_EF1_YFP-Taral-PH1A    | PIP05071121 | 4.671    | 4.086    | 1.156    |
| pEX_EF1_YFP-Dok5-PH1A     | PIP05071122 | 4.406    | 7.77     | 20.253   |
| pEX_EF1_YFP-Afapl-PH1A    | PIP05061306 | 36.57687 | 31.47523 | 41.58657 |
| pEX_EF1_YFP-PLCd4-PH1A    | PIP05071124 | 7.19     | 10.742   | 15.861   |
| pEX_EF1_YFP-RIGPS2-PH1A   | PIP05071304 | 69.514   | 22.101   | 109.234  |
| pEX_EF1_YFP-Osdbl7-PH1A   | PIP05071307 | 18.911   | 21.485   | 23.381   |
| pEX_EF1_YFP-RhoGap1-PH1A  | PIP05071310 | 19.023   | 15.349   | 21.582   |
| pEX_EF1_YFP-BCRa-PH1A     | PIP05061316 | 28.674   | 34.371   | 40.064   |
| pEX_EF1_YFP-Rhogefl-PH1A  | PIP05071311 | 16.026   | 15.33    | 19.365   |
| pEX_EF1_YFP-Net1-PH1A     | PIP05071313 | 10.819   | 11.267   | 12.157   |
| pEX_EF1_YFP-Hapipl-PH1A   |             | 11.3805  | 12.125   | 15.9435  |
| pEX_EF1_YFP-Cnk2-PH1A     | PIP05071315 | 47.986   | 53.792   | 73.057   |
| pEX_EF1_YFP-Arl6l-PH1A    | PIP05071318 | 23.702   | 17.223   | 29.541   |
| pEX_EF1_YFP-Parxl-PH4A    | PIP05071322 | 6.909    | 7.206    | 7.933    |
| pEX_EF1_YFP-Scopl-PH1A    | PIP05071323 | -4.268   | -2.135   | -6.237   |
| pEX_EF1_YFP-Plekha2-PHTA  | PIP05071325 | 14.025   | 16.852   | 17.824   |
| pEX_EF1_YFP-VAV1-PH1A     | PIP05062006 | 7.944    | 11.337   | 11.959   |
| pEX_EF1_YFP-DNM2-PH1A     | PIP05062012 | 6.257    | 10.728   | 10.898   |
| pEX_EF1_YFP-FGD1A-PH1A    | PIP05062013 | 13.011   | 17.118   | 21.45    |
| pEX_EF1_YFP-VAV2-PH1A     | PIP05071302 | 9.24     | 10.701   | 9.683    |
| pEX_EF1_YFP-VAV3-PH1A     |             | 0        | 0        | 0        |
| pEX_EF1_YFP-SNTA1-PH1A    | PIP05072018 | 4.292    | 6.013    | 5.309    |
| pEX_EF1_YFP-PsGAP-PH1A    | PIP05062719 | -5.915   | -3.162   | -4.667   |
| pEX_EF1_YFP-Plekha3-PH1A  | PIP05070508 | 3.1784   | 2.6845   | 4.0211   |
| pEX_EF1_YFP-Net1-PH1A     | PIP05071105 | 9.196    | 12.586   | 12.8     |
| pEX_EF1_YFP-Phdp1-PH1A    | PIP05071309 | 4.312    | 3.695    | 2.84     |
| pEX_EF1_YFP-Parxl-PH3A    | PIP05071321 | 17.441   | 7.404    | 11.994   |
| pEX_EF1_YFP-CRIK-PH1A     | PIP05062005 | 2.108    | 3.825    | 5.156    |
| pEX_EF1_YFP-DNM1-PH1A     | PIP05062011 | 5.728    | 10.94    | 9.395    |
| pEX_EF1_YFP-FGD1A-PH2A    | PIP05062014 | 6.3131   | 9.4924   | 10.9979  |
| pEX_EF1_YFP-Rasgrf1A-PH1A | PIP05062015 | 1.301    | 4.371    | 5.992    |
| pEX_EF1_YFP-Rasgrf1-PH2A  | PIP05062016 | 6.833    | 12.291   | 13.077   |
| pEX_EF1_YFP-Grb7-PH1A     | PIP05062017 | -1.671   | 4.3      | 4.681    |
| pEX_EF1_YFP-Grb10-PH1A    | PIP05062018 | -0.251   | 2.047    | 1.411    |
| pEX_EF1_YFP-KIF1A-PH1A    | PIP05072008 | 12.721   | 13.96    | 14.947   |
| pEX_EF1_YFP-KIF1B-PH1A    | PIP05062021 | 5.371    | 11.054   | 10.537   |
| pEX_EF1_YFP-PKD1-PH1A     | PIP05062022 | 15.3975  | 21.6703  | 23.1561  |
| pEX_EF1_YFP-LFC-PH1A      | PIP05062024 | 7.144    | 13.814   | 10.504   |
| pEX_EF1_YFP-SNTB1-PH1A    | PIP05062025 | 4.115    | 4.82     | 6.518    |
| pEX_EF1_YFP-SH2B-PH1A     | PIP05062026 | -0.437   | 4.183    | 5.342    |
| pEX_EF1_YFP-SWAP70-PH1A   | PIP05071301 | 9.554    | 12.201   | 11.462   |
| pEX_EF1_YFP-VAV2-PH1B     | ETG03100703 | 13.988   | 5.89     | 11.915   |
| pEX_EF1_YFP-FGD2-PH1A     | PIP05072011 | 11.891   | 10.239   | 13.111   |
| pEX_EF1_YFP-FGD3-PH1A     | PIP05072021 | 14.717   | 15.204   | 19.109   |
| pEX_EF1_YFP-Rasgrf2-PH1A  | PIP05072013 | 6.933    | 8.172    | 9.593    |
| pEX_EF1_YFP-Cool1-PH1A    | PIP05072015 | 2.94     | 1.997    | 2.392    |
| pEX_EF1_YFP-PLD1-PH1A     | PIP05072016 | 5.374    | 5.459    | 5.559    |
| pEX_EF1_YFP-Pldt2-PH1A    | PIP05072017 | 3.678    | 7.076    | 6.599    |
| pEX_EF1_YFP-SNTB2-PH1A    | PIP05072019 | 0.188    | -0.416   | 0.071    |
| pEX_EF1_YFP-Ophn1-PH1A    | ETG03110406 | 22.672   | 13.83    | 18.059   |

|                           |             |          |          |          |
|---------------------------|-------------|----------|----------|----------|
| pEX_EF1_YFP-Osbpl5-PH1A   | PIP05062721 | 4.1727   | 7.2088   | 3.6281   |
| pEX_EF1_YFP-Capri-PH1A    | ETG03110413 | 26.04    | 30.851   | 27.641   |
| pEX_EF1_YFP-GNRPx-PH1A    | PIP05070502 | 5.1322   | 10.3678  | 12.341   |
| pEX_EF1_YFP-H060-PH1A     | PIP05070503 | 25.96    | 36.5519  | 28.461   |
| pEX_EF1_YFP-COL4BP-PH1A   | PIP05070507 | 0.5783   | -3.6509  | -3.6233  |
| pEX_EF1_YFP-Plekha2-PH1A  | PIP05070509 | 7.6618   | 8.2166   | 6.3022   |
| pEX_EF1_YFP-Plek-PH2A     | PIP05070512 | 1.661    | 1.874    | 1.604    |
| pEX_EF1_YFP-Myo10-PH2A    | PIP05070515 | 9.529    | 10.405   | 10.263   |
| pEX_EF1_YFP-Evt2-PH1A     | ETG03111114 | -0.176   | 1.333    | 2.881    |
| pEX_EF1_YFP-Plek2-PH2A    | PIP05070525 | 118.1531 | 1.943    | 4.448    |
| pEX_EF1_YFP-Tiam2-PH1A    | PIP05071101 | 2.816    | 2.482    | 1.802    |
| pEX_EF1_YFP-Ese1-PH1A     | PIP05071102 | 4.721    | 3.408    | 10.446   |
| pEX_EF1_YFP-Ese2-PH1A     | PIP05071103 | -1.0244  | 9.0483   | 5.4986   |
| pEX_EF1_YFP-Rhoip2-PH1A   | PIP05071107 | 1.585    | 1.365    | 4.23     |
| pEX_EF1_YFP-Rhoip3-PH2A   | PIP05071106 | 5.629    | 7.112    | 7.715    |
| pEX_EF1_YFP-Rasa3-PH1A    | ETG03111814 | -2.318   | 3.532    | 6.97     |
| pEX_EF1_YFP-SOS1-PH1A     | PIP05071113 | 10.9196  | 14.4548  | 16.2554  |
| pEX_EF1_YFP-Tiam1-PH1A    | PIP05071115 | 11.295   | 17.219   | 18.328   |
| pEX_EF1_YFP-Tiam1-PH2A    | PIP05071116 | 7.299    | 6.251    | 4.49     |
| pEX_EF1_YFP-SOS2-PH1A     | PIP05071117 | 2.373    | 4.119    | 3.714    |
| pEX_EF1_YFP-AmylB-PH1A    | PIP05071120 | 0.726    | 4.052    | 2.994    |
| pEX_EF1_YFP-Grb14-PH1A    | PIP05071125 | 4.434    | 6.625    | 5.95     |
| pEX_EF1_YFP-ROCK1-PH1A    | PIP05071303 | 6.769    | 3.499    | 6.828    |
| pEX_EF1_YFP-Myo10-PHTA    | PIP05071305 | 9.509    | 9.038    | 10.895   |
| pEX_EF1_YFP-PHR1-PH1A     | PIP05071306 | 3.067    | 3.465    | 2.781    |
| pEX_EF1_YFP-PP3bp2l-PH1A  | PIP05071308 | 22.224   | 22.697   | 26.006   |
| pEX_EF1_YFP-Dagk4l-PH1A   | PIP05071312 | 11.796   | 15.47    | 16.307   |
| pEX_EF1_YFP-CentB5-PH1A   | PIP05071314 | 6.459    | 6.771    | 12.374   |
| pEX_EF1_YFP-CentD2l-PH1A  | PIP05071316 | 11.456   | 10.86    | 10.561   |
| pEX_EF1_YFP-CentD2l-PH2A  | PIP05071317 | 6.629    | 6.824    | 6.661    |
| pEX_EF1_YFP-Plekhc1-PH1A  | PIP05071319 | 2.224    | 4.341    | 4.989    |
| YFP                       |             | 4.008    | 0.901667 | -0.00833 |
| VAV3-PH1A                 | PIP05072001 | 5.215    | 4.489    | 4.156    |
| pEX_EF1_YFP-Rasgrf1B-PH1A | ETG03111801 | 30.601   | 10.648   | 18.12    |





























| PI(3,4,5)P3 | PM loc | %Trans | Ves loc |   |   |   |   |
|-------------|--------|--------|---------|---|---|---|---|
| 58.2685     | Y      | 100    | Y       | 1 |   |   |   |
| 40.424      | Y      | 89     | Y       | 1 |   |   |   |
| 149.9232    | Y      | 51     | Y       | 1 |   |   |   |
| 46.27393    | Y      | 50     | Y       | 1 |   |   |   |
| 54.4387     | Y      | 90     | N       |   | 1 |   |   |
| 68.0547     | Y      | 81     | N       |   | 1 |   |   |
| 24.5162     | Y      | 80     | N       |   | 1 |   |   |
| 91.1513     | Y      | 77     | N       |   | 1 |   |   |
| 156.5038    | Y      | 74     | N       |   | 1 |   |   |
| 4.343       | Y      | 72     | N       |   | 1 |   |   |
| 125.4444    | Y      | 57     | N       |   | 1 |   |   |
| 123.7781    | Y      | 53     | N       |   | 1 |   |   |
| 29.091      | Y      | 39     | N       |   | 1 |   |   |
| 68.3401     | Y      | 32     | N       |   | 1 |   |   |
| 27.2169     | Y      | 22     | N       |   | 1 |   |   |
| 15.0232     | Y      | 13     | N       |   | 1 |   |   |
| 10.951      | Y      | 0      | Y       |   |   | 1 |   |
| 37.798      | Y      | 0      | Y       |   |   | 1 |   |
| 18.771      | Y      | 0      | Y       |   |   | 1 |   |
| 60.782      | Y      | 0      | Y       |   |   | 1 |   |
| 15.8553     | Y      | 0      | Y       |   |   | 1 |   |
| 10.137      | Y      | 0      | Y       |   |   | 1 |   |
| 14.0433     | Y      | 0      | N       |   |   |   | 1 |
| 31.8256     | Y      | 0      | N       |   |   |   | 1 |
| 4.72        | Y      | 0      | N       |   |   |   | 1 |
| 20.173      | Y      | 0      | N       |   |   |   | 1 |
| 2.173       | Y      | 0      | N       |   |   |   | 1 |
| 1.164       | Y      | 0      | N       |   |   |   | 1 |
| 48.2855     | Y      | 0      | N       |   |   |   | 1 |
| 16.6465     | Y      | 0      | N       |   |   |   | 1 |
| 77.3594     | Y      | 0      | N       |   |   |   | 1 |
| 40.954      | Y      | 0      | N       |   |   |   | 1 |
| 36.194      | Y      | 0      | N       |   |   |   | 1 |
| 81.5544     | Y      | 0      | N       |   |   |   | 1 |
| 40.136      | Y      | 0      | N       |   |   |   | 1 |
| 50.9341     | Y      | 0      | N       |   |   |   | 1 |
| 14.944      | Y      | 0      | N       |   |   |   | 1 |
| 39.4693     | Y      | 0      | N       |   |   |   | 1 |
| 103.3201    | Y      | 0      | N       |   |   |   | 1 |
| 11.3138     | Y      | 0      | N       |   |   |   | 1 |
| 18.9291     | Y      | 0      | N       |   |   |   | 1 |
| 42.1056     | Y      | 0      | N       |   |   |   | 1 |
| 25.623      | Y      | 0      | N       |   |   |   | 1 |
| 3.3147      | Y      | 0      | N       |   |   |   | 1 |
| 26.043      | Y      | 0      | N       |   |   |   | 1 |
| 4.3359      | Y      | 0      | N       |   |   |   | 1 |
| 22.6055     | Y      | 0      | N       |   |   |   | 1 |
| 33.371      | Y      | 0      | N       |   |   |   | 1 |
| 12.822      | Y      | 0      | N       |   |   |   | 1 |
| 3.871       | Y      | 0      | N       |   |   |   | 1 |

|         |   |   |   |   |   |
|---------|---|---|---|---|---|
| 14.171  | Y | 0 | N | 1 |   |
| -0.691  | Y | 0 | N | 1 |   |
| 12.007  | Y | 0 | N | 1 |   |
| 39.9215 | Y | 0 | N | 1 |   |
| 11.848  | Y | 0 | N | 1 |   |
| 115.401 | Y | 0 | N | 1 |   |
| 36.077  | Y | 0 | N | 1 |   |
| 25.605  | Y | 0 | N | 1 |   |
| 39.852  | Y | 0 | N | 1 |   |
| 19.811  | Y | 0 | N | 1 |   |
| 13.957  | Y | 0 | N | 1 |   |
| 11.537  | Y | 0 | N | 1 |   |
| 78.327  | Y | 0 | N | 1 |   |
| 26.946  | Y | 0 | N | 1 |   |
| 16.397  | Y | 0 | N | 1 |   |
| -6.488  | Y | 0 | N | 1 |   |
| 21.501  | Y | 0 | N | 1 |   |
| 11.955  | N | 0 | Y |   | 1 |
| 13.936  | N | 0 | Y |   | 1 |
| 19.326  | N | 0 | Y |   | 1 |
| 10.233  | N | 0 | Y |   | 1 |
| 0       | N | 0 | Y |   | 1 |
| 8.78    | N | 0 | Y |   | 1 |
| -4.487  | N | 0 | Y |   | 1 |
| 3.6623  | N | 0 | Y |   | 1 |
| 11.367  | N | 0 | Y |   | 1 |
| 5.503   | N | 0 | Y |   | 1 |
| 23.016  | N | 0 | Y |   | 1 |
| 7.724   | N | 0 | N |   |   |
| 16.399  | N | 0 | N |   |   |
| 13.9593 | N | 0 | N |   |   |
| 6.935   | N | 0 | N |   |   |
| 18.175  | N | 0 | N |   |   |
| 5.19    | N | 0 | N |   |   |
| 4.431   | N | 0 | N |   |   |
| 17.595  | N | 0 | N |   |   |
| 12.136  | N | 0 | N |   |   |
| 24.6181 | N | 0 | N |   |   |
| 13.358  | N | 0 | N |   |   |
| 9.171   | N | 0 | N |   |   |
| 3.658   | N | 0 | N |   |   |
| 17.085  | N | 0 | N |   |   |
| 23.526  | N | 0 | N |   |   |
| 13.625  | N | 0 | N |   |   |
| 23.287  | N | 0 | N |   |   |
| 12.542  | N | 0 | N |   |   |
| 4.453   | N | 0 | N |   |   |
| 8.596   | N | 0 | N |   |   |
| 10.169  | N | 0 | N |   |   |
| 2.035   | N | 0 | N |   |   |
| 26.973  | N | 0 | N |   |   |

|          |   |   |   |
|----------|---|---|---|
| 7.6804   | N | 0 | N |
| 28.594   | N | 0 | N |
| 8.8291   | N | 0 | N |
| 27.869   | N | 0 | N |
| 0.8276   | N | 0 | N |
| 8.5441   | N | 0 | N |
| 3.669    | N | 0 | N |
| 9.571    | N | 0 | N |
| 3.562    | N | 0 | N |
| 10.504   | N | 0 | N |
| 3.116    | N | 0 | N |
| 14.124   | N | 0 | N |
| 4.2546   | N | 0 | N |
| 2.621    | N | 0 | N |
| 2.098    | N | 0 | N |
| 4.04     | N | 0 | N |
| 16.4621  | N | 0 | N |
| 15.421   | N | 0 | N |
| 1.623    | N | 0 | N |
| 3.827    | N | 0 | N |
| 4.951    | N | 0 | N |
| 4.596    | N | 0 | N |
| 7.94     | N | 0 | N |
| 19.167   | N | 0 | N |
| 4.491    | N | 0 | N |
| 27.847   | N | 0 | N |
| 19.95    | N | 0 | N |
| 16.54    | N | 0 | N |
| 10.647   | N | 0 | N |
| 10.882   | N | 0 | N |
| 6.459    | N | 0 | N |
| -0.99467 | N | 0 | N |
| 6.903    |   |   |   |
| 32.517   |   |   |   |



































Type of file: table

Label: Table 2

Filename: mmc8.xls

Supplementary Table 2, Park et al.

Mouse PH-domains - translocation and localization in response to PDGF, basal localization, lipid blot binding data, and cloning information

| #  | SWISS-PROT   | Name of construct | NM or XM #           | Alternative names                                                   | Translocating/PM-localized/<br>or Cytosolic | NIH3T3 cell<br>PM translocation |
|----|--------------|-------------------|----------------------|---------------------------------------------------------------------|---------------------------------------------|---------------------------------|
| 1  | Q8BGR1_MOUSE | Z610034M16RIK-PH  | NM_027001            | AV114557                                                            | P                                           | N                               |
| 2  | Q8BGR1_MOUSE | Z610034M16RIK-PH2 | NM_027001            | AV114557                                                            | P                                           | N                               |
| 3  | Q3U5G0_MOUSE | ABR-PH            | NM_198894            | RP23-48B14.2, 6330400K15Rik, AU042359                               | C                                           | N                               |
| 4  | ARBK1_MOUSE  | ADRPK1-PH         | NM_130863            | Adrbk-1, Bark-1, GRK2, betaARK1                                     | P                                           | N                               |
| 5  | Q3UGX1_MOUSE | AFAP1-PH          | NM_027373            | AFAP; mKIAA3018, 9630044L16Rik, A1848729; AFAP-110                  | P                                           | N                               |
| 6  | Q3T998_MOUSE | AKAP13-PH         | XM_907140, XM_133543 | 1700026G02Rik, 5730522G15Rik, AKAP-Lbc, BRX, Ht31, LBC, PROTO-      | T                                           | Y                               |
| 7  | AKT1_MOUSE   | AKT1-PH           | NM_009652            | Akt, PKB, PKB/Akt, PKBalpha                                         | T                                           | Y                               |
| 8  | AKT2_MOUSE   | AKT2-PH           | NM_007434            | 2410016A19Rik, AW554154, MGC14031, PKB, PKBbeta                     | T                                           | Y                               |
| 9  | AKT3_MOUSE   | AKT3-PH           | NM_011785            | A1851531, D930002M15Rik                                             | T                                           | Y                               |
| 10 | AB1IP_MOUSE  | APBB1IP-PH        | NM_019456            | 9930118P07Rik, Prp48                                                | C                                           | N                               |
| 11 | Q6A055_MOUSE | ARHGEF18-PH       | NM_133962            | A1467246, D030053O22Rik                                             | P                                           | N                               |
| 12 | Q6Y5D6_MOUSE | ARHGAP10-PH       | NM_030113            | A930033B01Rik, PSGAP-m, PSGAP-s                                     | C                                           | N                               |
| 13 | ARHG2_MOUSE  | ARHGEF2-PH        | NM_008487            | AA408978, GEF, GEF-H1, GEFH1, LFP40, Lbcl1, Lfc, P40, mKIAA0651     | C                                           | N                               |
| 14 | ARHG3_MOUSE  | ARHGEF3-PH        | NM_027871            | 1200004I24Rik, 9830169H03Rik, C76747                                | C                                           | N                               |
| 15 | ARHG7_MOUSE  | ARHGEF7-PH        | NM_017402            | PIX, Pak3bp, betaPix-b, betaPix-c, mKIAA0142, p85Cool1, p85SPR      | C                                           | N                               |
| 16 | BTK_MOUSE    | BTK-PH            | NM_013482            | A1528679, xid                                                       | T                                           | Y                               |
| 17 | CAPS1_MOUSE  | CADPS-PH          | NM_012061            | AU067781, CAPS, CAPS1, MGC90712, mKIAA1121                          | C                                           | N                               |
| 18 | Q3UH98_MOUSE | CENTB5-PH         | NM_207223            | Kiaa1716-hp, mKIAA1716                                              | C                                           | N                               |
| 19 | CEND1_MOUSE  | CENTD1-PH         | XM_132099            | ARAP2, Gm148, mKIAA0580                                             | C                                           | N                               |
| 20 | CEND1_MOUSE  | CENTD1-PH2        | XM_132099            | ARAP2, Gm148, mKIAA0580                                             | C                                           | N                               |
| 21 | Q3UDD2_MOUSE | CENTD2-PH         | NM_027180            | 2410002L19Rik, mKIAA0782                                            | C                                           | N                               |
| 22 | Q3UDD2_MOUSE | CENTD2-PH2        | NM_027180            | 2410002L19Rik, mKIAA0782                                            | C                                           | N                               |
| 23 | CTRO_MOUSE   | CIT-PH            | NM_007708            | C030025P15Rik, CRIK, CRIK-SK, Cit-k                                 | C                                           | N                               |
| 24 | CNKR2_MOUSE  | CNKSR2-PH         | NM_177751            | C030004A01, Cnk2, Ksr2, mKIAA0902                                   | T                                           | Y                               |
| 25 | C43BP_MOUSE  | COL4ABP3-PH       | NM_023420            | 2810404O15Rik, 9230101K08Rik, AU016711, CERT, GPBP                  | C                                           | N                               |
| 26 | DAPP1_MOUSE  | DAPP1-PH          | NM_011932            | Bam32                                                               | T                                           | Y                               |
| 27 | DDEF1_MOUSE  | DDEF1-PH          | NM_010026            | AV239055, Asap1, PAP, mKIAA1249, s19                                | P                                           | N                               |
| 28 | Q6A0B7_MOUSE | DGKD-PH           | XM_906228            | A1841987, D330025K09, DGKdelta, KIAA0145, dgkd-2                    | P                                           | N                               |
| 29 | DYN1_MOUSE   | DNM1-PH           | NM_010065            | A1838169, Dnm, KIAA4093, mKIAA4093                                  | C                                           | N                               |
| 30 | DYN2_MOUSE   | DNM2-PH           | NM_007871            |                                                                     | C                                           | N                               |
| 31 | DOK1_MOUSE   | DOK1-PH           | NM_010070            | AW557123, p62DOK                                                    | P                                           | N                               |
| 32 | DOK4_MOUSE   | DOK4-PH           | NM_053246            |                                                                     | P                                           | N                               |
| 33 | DOK5_MOUSE   | DOK5-PH           | NM_029761            | 2700055C10Rik                                                       | P                                           | N                               |
| 34 | Q3UY58_MOUSE | FARP1-PH          | NM_134082            | AW228844, BC030329, Cdep                                            | C                                           | N                               |
| 35 | Q3UY58_MOUSE | FARP1-PH2         | NM_134082            | AW228844, BC030329, Cdep                                            | C                                           | N                               |
| 36 | FGD1_MOUSE   | FGD1-PH           | NM_008001            | ZFYVE3                                                              | C                                           | N                               |
| 37 | FGD1_MOUSE   | FGD1-PHB          | NM_008001            | ZFYVE3                                                              | C                                           | N                               |
| 38 | FGD2_MOUSE   | FGD1-PH2          | NM_008001            | ZFYVE3                                                              | C                                           | N                               |
| 39 | FGD2_MOUSE   | FGD2-PH           | NM_013710            | ZFYVE4                                                              | C                                           | N                               |
| 40 | FGD3_MOUSE   | FGD3-PH           | NM_015759            | 5830461L01Rik, ZFYVE5                                               | C                                           | N                               |
| 41 | FGD6_MOUSE   | FGD6-PH           | NM_053072            | AA123052, Etohd4, ZFYVE24                                           | C                                           | N                               |
| 42 | FGD6_MOUSE   | FGD6-PH2          | NM_053072            | AA123052, Etohd4, ZFYVE24                                           | T                                           | Y                               |
| 43 | FGD6_MOUSE   | FGD6-PHT          | NM_053072            | AA123052, Etohd4, ZFYVE24                                           | T                                           | Y                               |
| 44 | GAB1_MOUSE   | GAB1-PH           | NM_021356            | AA408973, AW107238                                                  | T                                           | Y                               |
| 45 | GAB2_MOUSE   | GAB2-PH           | NM_010248            | A1463667, D13005817Rik, p97                                         | T                                           | Y                               |
| 46 | Q3TYF3_MOUSE | GEFT-PH           | NM_028027            | 2410008H17Rik, p63RhoGEF, D10Ert610e                                | P                                           | N                               |
| 47 | GRB10_MOUSE  | GRB10-PH          | NM_010345            | RP23-119N24.1, 5730571D09Rik, AI325020, Meg1, mKIAA0207             | C                                           | N                               |
| 48 | GRB14_MOUSE  | GRB14-PH          | NM_016719            | A1505286                                                            | C                                           | N                               |
| 49 | GRB7_MOUSE   | GRB7-PH           | NM_010346            | KIAA4028, MGC78181, mKIAA4028                                       | C                                           | N                               |
| 50 | IRS1_MOUSE   | IRS1-PH           | NM_010570            | G972R, IRS-1                                                        | P                                           | N                               |
| 51 | ITK_MOUSE    | ITK-PH            | NM_010583            | RP23-273O7.1, Emt, Tcsk, Tsk                                        | T                                           | Y                               |
| 52 | ITSN1_MOUSE  | ITSN1-PH          | NM_010587            | AA517634, AA545208, A1316805, EHS1, Ese1, Intersectin, Itsn, Sh3p17 | C                                           | N                               |

|     |              |              |              |                                                                   |   |   |
|-----|--------------|--------------|--------------|-------------------------------------------------------------------|---|---|
| 53  | ITSN2_MOUSE  | ITSN2-PH     | NM_011365    | Al327390, Ese2, Sh3d1B, Sh3p18, mKIAA1256                         | C | N |
| 54  | Q3TY8_MOUSE  | KALRN-PH     | XM_993034    | 2210407G14Rik, AV235988, DUET, E530005C20Rik, Gm539, Hapip,       | C | N |
| 55  | KIF1A_MOUSE  | KIF1A-PH     | NM_008440    | ATSV, C630002N23Rik, Gm1626, Kns1                                 | C | N |
| 56  | KIF1B_MOUSE  | KIF1B-PH     | NM_207682    | A530096N05Rik, Al448212, Al506502, D4Mii1e, KIF1Bp130, KIF1Bp204, | C | N |
| 57  | MCF2L_MOUSE  | MCF21-PH     | NM_178076    | C130040G20Rik, Dbs, Ost, Ost gamma, mKIAA0362                     | C | N |
| 58  | Q2L4X0_MUSMM | MCF2-PH      | NM_133197    | B230117G22Rik, Dbl, MGC159138, Mcf-2                              | P | N |
| 59  | MRIP_MOUSE   | M-RIP-PH     | NM_201245    | M-RIP; RHOIP3; p116Rip; KIAA0864, AA536749                        | P | N |
| 60  | MRIP_MOUSE   | M-RIP-PH2    | NM_201245    | M-RIP; RHOIP3; p116Rip; KIAA0864, AA536749                        | C | N |
| 61  | P70316_MOUSE | MYO10-PH     | NM_019472    | AW048724, D15Ert600e, mKIAA0799                                   | T | Y |
| 62  | P70316_MOUSE | MYO10-PH2    | NM_019472    | AW048724, D15Ert600e, mKIAA0799                                   | C | N |
| 63  | P70316_MOUSE | MYO10-PHT    | NM_019472    | AW048724, D15Ert600e, mKIAA0799                                   | T | Y |
| 64  | ARHG8_MOUSE  | NET1-PH      | NM_019671    | 0610025H04Rik, 9530071N24Rik, Al604373, AU015857, Net1a, mNET1    | C | N |
| 65  | NGEF_MOUSE   | NGEF-PH      | NM_019867    | Tims2, ephexin                                                    | C | N |
| 66  | OPHN1_MOUSE  | OPHN1-PH     | NM_052976    | C130037N19Rik, MGC6513                                            | C | N |
| 67  | Q80UX3_MOUSE | OSBPL3-PH    | NM_027881    | 1200014M06Rik, 6720421I08Rik, A530055M08, MGC102333, ORP3,        | T | Y |
| 68  | OSBL5_MOUSE  | OSBPL5-PH    | NM_024289    | 1110006M06Rik, Al462538, ORP5, Obph1, Osbp2                       | C | N |
| 69  | Q3TAX1_MOUSE | OSBPL7-PH    | XM_193637    | 4933437E18Rik                                                     | T | Y |
| 70  | PDPK1_MOUSE  | PDPK1-PH     | NM_011062    | PDK1                                                              | T | Y |
| 71  | PHLB1_MOUSE  | PHLDB1-PH    | NM_153537    | AU041016, D330037A14Rik, Li5a, MGC32394                           | T | Y |
| 72  | PHLPP_MOUSE  | PHLPP-PH     | XM_129968    | SCOP, Plectin1                                                    | T | Y |
| 73  | Q05DG3_MOUSE | PLCD1-PH     | NM_019676    | AW212592, C79986                                                  | P | N |
| 74  | Q3USN9_MOUSE | PLCD4-PH     | NM_148937    | 4921507K24Rik                                                     | C | N |
| 75  | Q3U4E2_MOUSE | PLCL2-PH     | NM_013880    | PLC-L2, Plce2, mKIAA1092                                          | P | N |
| 76  | PLD1_MOUSE   | PLD1-PH      | NM_008875    | AA536939, C85393, Pld1a, Pld1b                                    | C | N |
| 77  | PLD2_MOUSE   | PLD2-PH      | NM_008876    | RP23-122P1.1                                                      | C | N |
| 78  | PLEK2_MOUSE  | PLEK2-PH     | NM_013738    |                                                                   | T | Y |
| 79  | PLEK2_MOUSE  | PLEK2-PH2    | NM_013738    |                                                                   | T | Y |
| 80  | PKHA1_MOUSE  | PLEKHA1-PH   | NM_133942    | AA960558, C920009D07Rik, TAPP1                                    | T | Y |
| 81  | PKHA2_MOUSE  | PLEKHA2-PH   | NM_031257    | 6430512N22Rik, Al851530, AU041791, TAPP2, W91773                  | C | N |
| 82  | PKHA2_MOUSE  | PLEKHA2-PH2  | NM_031257    | 6430512N22Rik, Al851530, AU041791, TAPP2, W91773                  | T | Y |
| 83  | PKHA2_MOUSE  | PLEKHA2-PHT  | NM_031257    | 6430512N22Rik, Al851530, AU041791, TAPP2, W91773                  | C | N |
| 84  | PKHA3_MOUSE  | PLEKHA3-PH   | NM_031256    | FAPP1                                                             | C | N |
| 85  | Q6ZPK1_MOUSE | PLEKHA5-PH   | NM_144920    | 2810431N21Rik, Al428202, AK129423, Ayu21-9, Gt(pU21)9Imeg,        | C | N |
| 86  | PKHB1_MOUSE  | PLEKHB1-PH   | NM_013746    | Al315628, PHR1, Phret1, evt-1                                     | P | N |
| 87  | PKHB2_MOUSE  | PLEKHB2-PH   | NM_145516    | 2310009M15Rik, AU018239, Evt2, Phdc, evt-2                        | C | N |
| 88  | PKHC1_MOUSE  | PLEKHC1-PH   | NM_146054    | AA960555, Kindlin-2, MGC36305, Mig2                               | C | N |
| 89  | PKHF1_MOUSE  | PLEKHF1-PH   | NM_024413    | 1810013P09Rik, APPD, LAF, PHAFIN1, ZFYVE15                        | P | N |
| 90  | Q8BQ13_MOUSE | PLEKHJ1-PH   | NM_023900    | 9530063M10Rik                                                     | C | N |
| 91  | Q3U3L2_MOUSE | PLEKHM1-PH   | NM_183034    | AP162, B2, BC038943, D330036J23Rik                                | C | N |
| 92  | Q3U0Q7_MOUSE | PLEKHM2-PH   | XM_924800    | 2310034J19Rik, Al854247, mKIAA0842                                | C | N |
| 93  | Q9CXH2_MOUSE | PLEKHO1-PH   | NM_023320    | 2810052M02Rik, Ckip1, JZA-20, Jza2, MGC151380                     | C | N |
| 94  | PLEK_MOUSE   | PLEK-PH2     | NM_019549    | RP23-348N2.1, 2010300B13Rik                                       | C | N |
| 95  | KPCD1_MOUSE  | PRKCM-PH     | NM_008858    | PPKD, PKD1, Pkcm                                                  | C | N |
| 96  | CYH1_MOUSE   | PSCD1-PH     | NM_011180    | CLM1, CTH-1, CYTIP, KIAA4240, mKIAA4240                           | T | N |
| 97  | CYH2_MOUSE   | PSCD2-PH     | NM_011181    | ARNO, CTH2, CLM2                                                  | T | Y |
| 98  | CYH3_MOUSE   | PSCD3-PH     | NM_011182    | CTH3, Al648983, Grp1, KIAA4241, mKIAA4241                         | T | Y |
| 99  | Q6NZP0_MOUSE | PSD2-PH      | NM_028707    | 6330404E20Rik, AW125584, EFA6C                                    | C | N |
| 100 | Q2PFD7_MOUSE | PSD3-PH      | NM_177698    | 4931420C21Rik, Al661273, BC003498, D430018P08, EFA6D, MGC6957     | P | N |
| 101 | Q7TPZ6_MOUSE | RALGPS2-PH   | NM_023884    | 1810020P17Rik, 2210408F11Rik, 4921528G01Rik, 9130014M22Rik,       | P | N |
| 102 | RASA2_MOUSE  | RASA2-PH     | NM_053268    | 5430433H21Rik, AA517451, AU023900, GAP1m                          | T | Y |
| 103 | Q2PMI6_MOUSE | RASA4-PH     | NM_133914    | AA793972, AW112107, BB079060, CAPRI, GAPL, KIAA0538, mKIAA053     | C | N |
| 104 | RASL1_MOUSE  | RASAL1-PH    | NM_013832    | MRASAL                                                            | C | N |
| 105 | GMRP_MOUSE   | RASGRF1A-PH  | NM_011245    | CDC25, CDC25Mm, Grf1, Grfbeta, P190-A, Ras-GRF1, p190, p190RhoG   | C | N |
| 106 | GMRP_MOUSE   | RASGRF1A-PH2 | NM_011245    | CDC25, CDC25Mm, Grf1, Grfbeta, P190-A, Ras-GRF1, p190, p190RhoG   | C | N |
| 107 | GMRP_MOUSE   | RASGRF1B-PH  | NM_001039655 | CDC25, CDC25Mm, Grf1, Grfbeta, P190-A, Ras-GRF1, p190,            | C | N |
| 108 | P70392_MOUSE | RASGRF2-PH   | NM_009027    | Grf2, Ras-GRF2                                                    | C | N |
| 109 | P70392_MOUSE | RASGRF2-PH2  | NM_009027    | Grf2, Ras-GRF2                                                    | C | N |
| 110 | RGNEF_MOUSE  | RGNEF-PH     | NM_012026    | 9230110L08Rik, Al323540, D13Bwg1089e, RIP2, RhoGEF, Rhoip2, p190  | C | N |

|     |              |           |                    |                                                                 |   |   |
|-----|--------------|-----------|--------------------|-----------------------------------------------------------------|---|---|
| 111 | ROCK1_MOUSE  | ROCK1-PH  | NM_009071          | Rock-I; 1110055K06Rik                                           | C | N |
| 112 | O54867_MOUSE | SH2B1-PH  | NM_011363          | Ai425885, Irip, SH2-B, SH2-Bb, Sh2bpsm1, mKIAA1299              | C | N |
| 113 | APS_MOUSE    | SH2B2-PH  | NM_018825          | APS                                                             | P | N |
| 114 | 3BP2_MOUSE   | SH3BP2-PH | NM_011893          | 3BP2                                                            | T | Y |
| 115 | Q3UND0_MOUSE | SKAP2-PH  | NM_018773          | 2610021A10Rik, AA960083, BB137539, RA70, SKAP-HOM, Saps, Scap2  | C | N |
| 116 | SNTA1_MOUSE  | SNTA1-PH  | NM_009228          | AW228934, Snt1                                                  | C | N |
| 117 | SNTB1_MOUSE  | SNTB1-PH  | NM_016667          | A1B; SNT2; BSYN2; 59-DAP; DAPA1B; SNT2B1; TIP-43; FLJ22442; MGC | C | N |
| 118 | SNTB2_MOUSE  | SNTB2-PH  | NM_009229          | SNT3; SNTL; SNT2B2; EST25263; D16S2531E                         | C | N |
| 119 | SOS1_MOUSE   | SOS1-PH   | NM_009231          | 9630010N06, Ai449023                                            | C | N |
| 120 | SOS2_MOUSE   | SOS2-PH   | XM_987825          |                                                                 | C | N |
| 121 | SPTB2_MOUSE  | SPNB2-PH  | NM_175836          | RP23-189P1.1, 9930031C03Rik, AL033301, KIAA4049, SPTB2, SPTBN1  | P | N |
| 122 | SWP70_MOUSE  | SWAP70-PH | NM_009302          | 70kDa, AV235546                                                 | C | N |
| 123 | TEC_MOUSE    | TEC-PH    | AK139329(BC037071) |                                                                 | T | Y |
| 124 | TIAM1_MOUSE  | TIAM1-PH  | NM_009384          | Ai847750, D16lum10, D16lum10e                                   | C | N |
| 125 | TIAM1_MOUSE  | TIAM1-PH2 | NM_009384          | Ai847750, D16lum10, D16lum10e                                   | C | N |
| 126 | Q3TSM6_MOUSE | TIAM2-PH  | NM_011878          | 3000002F19Rik, STEF, mKIAA2016                                  | C | N |
| 127 | TARA_MOUSE   | TRIOBP-PH | NM_001039156       | Ai428493, EST478828, Tara, mKIAA1662                            | C | N |
| 128 | VAV_MOUSE    | VAV1-PH   | NM_011691          | Vav, vav-T                                                      | C | N |
| 129 | VAV2_MOUSE   | VAV2-PH   | NM_009500          | 2810040F13Rik, Ai847175                                         | C | N |
| 130 | VAV2_MOUSE   | VAV2-PHB  | NM_009500          | 2810040F13Rik, Ai847175                                         | C | N |
| 131 | VAV3_MOUSE   | VAV3-PH   | NM_020505          | A530094I06Rik, AA986410, MGC27838                               | C | N |
| 132 | Q8K4P5_MOUSE | VEPH-PH   | NM_145820          | 2810471M23Rik, Veph                                             | P | N |

| NIH3T3 cell<br>Basal PM loc | Lysophosphatidic<br>Acid | Lysophosphatidylcholine | PtdIns | PI(3)P | PI(4)P | PI(5)P | Phosphatidylethanolamine | Phosphatidylcholine | Sphingosine-1-phosphate |
|-----------------------------|--------------------------|-------------------------|--------|--------|--------|--------|--------------------------|---------------------|-------------------------|
| Y(H)                        | 6.38                     | 0.97                    | 17.01  | 39.88  | 34.91  | 35.19  | 2.56                     | 2.69                | 1.94                    |
| N                           | 4.51                     | 1.51                    | 43.10  | 51.91  | 52.84  | 54.73  | 0.99                     | 0.97                | 3.02                    |
| N                           | 6.23                     | 0.81                    | 9.86   | 44.44  | 74.15  | 63.52  | 1.36                     | 2.28                | 4.22                    |
| Y(H)                        | 6.82                     | -1.28                   | 18.33  | 26.46  | 28.17  | 25.04  | -1.02                    | 0.07                | 0.71                    |
| N                           | 6.85                     | 3.90                    | 11.31  | 23.68  | 32.41  | 28.14  | 3.41                     | 5.53                | 6.57                    |
| Y(L)                        | 1.11                     | 1.84                    | 19.83  | 22.42  | 28.28  | 27.01  | 4.58                     | 4.02                | 3.57                    |
| Y(L)                        | 6.10                     | 2.92                    | 16.33  | 28.87  | 22.88  | 29.97  | 1.60                     | 2.37                | 4.93                    |
| Y(L)                        | 1.05                     | 1.01                    | 10.57  | 22.87  | 20.53  | 24.72  | 0.79                     | 2.06                | 1.83                    |
| Y(L)                        | 1.27                     | 0.94                    | 4.45   | 12.91  | 12.33  | 15.97  | 1.58                     | 3.50                | 0.12                    |
| N                           | 2.72                     | 3.74                    | 21.47  | 30.11  | 33.71  | 26.99  | -1.40                    | 4.07                | 5.30                    |
| N                           | 3.79                     | -0.10                   | 12.39  | 20.70  | 24.02  | 19.09  | -1.37                    | -0.88               | 3.95                    |
| N                           | 3.61                     | 2.74                    | 18.31  | 17.44  | 20.71  | 23.57  | 2.96                     | 3.26                | 3.62                    |
| N                           | 2.97                     | 1.16                    | 17.64  | 27.33  | 24.80  | 29.61  | 0.04                     | 1.83                | 2.80                    |
| N                           | 1.52                     | 0.24                    | 1.96   | 2.58   | 3.40   | 1.38   | 1.96                     | 0.98                | 3.20                    |
| N                           | 1.05                     | 0.22                    | 0.34   | 4.81   | 6.13   | 6.78   | -0.10                    | -0.51               | 2.47                    |
| N                           | 4.69                     | 0.49                    | 36.52  | 43.49  | 47.10  | 51.39  | 3.12                     | 0.99                | 2.29                    |
| N                           | 1.29                     | 0.74                    | 12.23  | 30.72  | 29.07  | 33.71  | -1.36                    | -0.32               | 2.89                    |
| N                           | 4.15                     | -0.84                   | 2.76   | 5.65   | 12.66  | 8.66   | 0.43                     | -3.58               | 4.14                    |
| N                           | 6.50                     | 0.69                    | 26.56  | 23.16  | 27.31  | 25.09  | -0.87                    | -2.39               | 5.18                    |
| N                           | 0.98                     | -3.90                   | 15.11  | 23.84  | 19.96  | 22.48  | 0.68                     | 1.43                | -0.20                   |
| N                           | 3.76                     | 0.55                    | 27.61  | 26.40  | 27.69  | 23.70  | -0.70                    | 0.51                | 2.18                    |
| N                           | 4.22                     | 2.41                    | 33.65  | 34.55  | 35.19  | 34.33  | 3.99                     | 1.74                | 1.49                    |
| N                           | 0.93                     | 3.11                    | 3.63   | 9.27   | 10.66  | 14.31  | -1.09                    | 0.96                | 4.20                    |
| Y(H)                        | -0.14                    | -1.81                   | 24.24  | 54.41  | 69.18  | 55.39  | -2.81                    | -1.40               | 0.73                    |
| N                           | 9.68                     | -2.04                   | 5.84   | 8.02   | 16.37  | 7.51   | 6.12                     | 9.58                | 12.43                   |
| N                           | 5.44                     | 1.83                    | 15.00  | 34.05  | 31.03  | 38.93  | 3.07                     | 3.06                | 4.83                    |
| N                           | 5.79                     | 3.93                    | 20.20  | 27.78  | 22.84  | 25.67  | 4.09                     | 3.41                | 4.91                    |
| Y(L)                        | 4.61                     | 1.64                    | 34.09  | 47.26  | 51.02  | 49.94  | 1.18                     | 0.96                | 2.19                    |
| N                           | -0.53                    | 1.43                    | 5.05   | 17.74  | 9.60   | 12.54  | 0.28                     | -3.34               | 1.50                    |
| N                           | 2.97                     | 1.11                    | 19.79  | 30.94  | 30.64  | 35.31  | 1.41                     | 2.78                | 3.30                    |
| Y(H)                        | 3.71                     | -0.11                   | 14.22  | 29.03  | 26.54  | 28.50  | 1.98                     | 2.40                | 7.07                    |
| Y(H)                        | 2.61                     | -0.56                   | 20.24  | 37.96  | 38.02  | 43.95  | 0.15                     | 0.48                | 2.87                    |
| Y(H)                        | 9.83                     | 4.14                    | 28.12  | 44.04  | 47.42  | 45.80  | 5.54                     | 4.70                | 6.88                    |
| N                           | 6.74                     | 4.47                    | 20.76  | 29.27  | 31.65  | 32.12  | 2.39                     | 1.80                | 5.03                    |
| N                           | 6.08                     | 3.29                    | 11.65  | 17.63  | 20.87  | 19.40  | 3.15                     | 3.70                | 10.26                   |
| N                           | 3.29                     | 0.87                    | 6.71   | 20.63  | 21.98  | 26.02  | 3.33                     | 1.96                | 5.19                    |
| N                           | 0.08                     | 1.79                    | 8.66   | 15.43  | 14.97  | 26.19  | 0.26                     | -0.07               | 2.51                    |
| N                           | 2.23                     | 1.84                    | 18.50  | 33.09  | 35.22  | 31.76  | 3.83                     | 1.88                | 1.87                    |
| N                           | 2.81                     | 1.62                    | 4.76   | 15.98  | 9.93   | 15.28  | 0.62                     | 0.36                | 5.65                    |
| N                           | -0.12                    | -1.74                   | 5.94   | 16.32  | 12.54  | 17.65  | -1.37                    | -3.20               | 2.43                    |
| N                           | 4.47                     | 1.97                    | 16.69  | 33.90  | 31.17  | 41.23  | 2.39                     | 1.51                | 2.58                    |
| N                           | 1.98                     | 1.64                    | 3.39   | 11.30  | 11.67  | 14.63  | 2.20                     | 2.81                | 5.84                    |
| N                           | 3.30                     | 2.55                    | 34.18  | 63.46  | 58.50  | 57.42  | -1.55                    | -0.11               | 3.98                    |
| Y(H)                        | 6.43                     | 2.55                    | 10.95  | 29.69  | 25.20  | 33.46  | 4.44                     | 5.31                | 4.96                    |
| Y(H)                        | 10.61                    | 0.41                    | 16.98  | 31.86  | 33.47  | 37.77  | 2.36                     | 2.95                | 4.80                    |
| N                           | 1.49                     | 2.01                    | 19.94  | 33.47  | 24.84  | 37.51  | 2.85                     | 1.86                | 4.36                    |
| N                           | 2.17                     | 3.24                    | 18.40  | 27.06  | 23.61  | 26.94  | 3.29                     | 3.15                | 0.87                    |
| N                           | 5.82                     | 0.15                    | 22.14  | 32.93  | 32.89  | 30.74  | 1.11                     | 1.75                | 2.95                    |
| N                           | -0.66                    | -0.14                   | 19.59  | 29.34  | 26.97  | 32.38  | 3.00                     | 2.69                | -1.13                   |
| Y(L)                        | 10.71                    | 0.30                    | 12.49  | 44.34  | 55.86  | 54.16  | -1.18                    | -0.73               | 4.99                    |
| N                           | 4.25                     | 2.62                    | 22.94  | 35.86  | 37.58  | 38.51  | 3.90                     | 1.82                | 2.71                    |
| N                           | -0.06                    | 2.36                    | 3.75   | 6.67   | 6.77   | 8.23   | 2.88                     | -0.21               | 2.84                    |

|      |       |       |       |       |        |       |       |       |       |
|------|-------|-------|-------|-------|--------|-------|-------|-------|-------|
| N    | -2.21 | 1.78  | 24.16 | 39.63 | 30.50  | 37.97 | 4.04  | 4.15  | -1.32 |
| N    | 2.90  | 2.88  | 21.70 | 20.20 | 26.05  | 23.58 | 3.79  | 4.40  | 4.09  |
| N    | 0.91  | 0.08  | 9.02  | 19.03 | 15.09  | 15.94 | -0.76 | -1.85 | 4.40  |
| N    | 4.92  | 3.78  | 17.84 | 27.19 | 27.46  | 31.15 | 3.45  | 4.18  | 0.24  |
| N    | 8.09  | 6.77  | 24.18 | 44.58 | 39.66  | 50.49 | 1.58  | 0.46  | 4.47  |
| Y(H) | 3.00  | 1.56  | 9.91  | 18.56 | 11.56  | 23.50 | 1.65  | 1.68  | 6.44  |
| N    | 4.73  | 3.68  | 6.98  | 13.39 | 11.24  | 14.61 | 3.46  | 2.46  | 5.54  |
| N    | 3.80  | 1.84  | 11.00 | 16.76 | 15.79  | 18.04 | 2.53  | 3.15  | 4.96  |
| N    | 0.78  | 0.76  | 8.06  | 11.01 | 12.64  | 12.50 | 2.93  | 2.59  | 2.00  |
| N    | 1.74  | 4.72  | 4.19  | 8.20  | 10.24  | 9.86  | 0.41  | 5.80  | 3.90  |
| N    | 2.97  | 1.36  | 16.28 | 23.94 | 26.12  | 26.09 | 1.69  | -0.43 | 1.50  |
| N    | 4.92  | 1.70  | 13.76 | 25.28 | 21.47  | 25.47 | 0.94  | 1.90  | 7.47  |
| N    | 3.20  | -0.37 | 11.29 | 18.91 | 17.05  | 19.27 | -0.27 | 0.17  | 5.41  |
| N    | 5.34  | 1.79  | 14.40 | 20.05 | 15.71  | 23.98 | -2.38 | 2.89  | 3.43  |
| Y(H) | 10.35 | 2.57  | 11.97 | 83.30 | 121.18 | 90.62 | 1.17  | 1.44  | 3.62  |
| N    | -0.93 | 1.90  | 27.99 | 42.08 | 34.01  | 43.92 | 2.82  | 2.99  | -4.59 |
| Y(H) | 4.38  | 1.30  | 23.27 | 38.69 | 46.17  | 38.35 | 2.22  | 1.31  | 2.23  |
| Y(L) |       |       |       |       |        |       |       |       |       |
| Y(H) | 3.21  | 0.15  | 16.49 | 25.51 | 29.68  | 28.36 | 1.31  | 1.85  | 2.30  |
| Y(H) | 4.83  | 1.77  | 5.25  | 4.01  | 3.40   | 5.34  | 2.05  | 1.65  | 1.89  |
| Y(H) | -0.14 | -1.49 | 3.90  | 10.02 | 8.90   | 13.02 | -1.44 | 0.45  | 2.72  |
| N    | 4.72  | -2.63 | 27.09 | 30.16 | 39.21  | 37.18 | 1.16  | -1.11 | 5.48  |
| Y(M) | 2.07  | 2.53  | 11.71 | 18.03 | 19.51  | 21.61 | 3.49  | 2.74  | 6.81  |
| N    | 0.07  | 0.76  | 6.94  | 17.82 | 16.34  | 17.92 | 0.13  | 1.87  | 0.53  |
| N    | 1.80  | 0.62  | 1.45  | 10.40 | 11.10  | 13.22 | 1.46  | -0.24 | 2.44  |
| N    | 2.60  | 1.67  | 11.08 | 29.33 | 22.25  | 29.61 | -0.23 | 0.88  | 5.14  |
| N    | 2.93  | 0.68  | 12.02 | 29.16 | 21.36  | 29.05 | 1.08  | 1.63  | 4.86  |
| N    |       |       |       |       |        |       |       |       |       |
| N    | 2.80  | 3.06  | 3.28  | 14.55 | 18.35  | 14.42 | 1.82  | 2.84  | 7.49  |
| N    | 5.46  | -0.43 | 5.87  | 28.51 | 29.60  | 37.99 | -0.54 | -0.91 | 1.58  |
| N    | 4.14  | 1.64  | 22.60 | 36.39 | 39.18  | 38.71 | -1.99 | 0.46  | 4.24  |
| N    | 8.76  | 9.11  | 9.68  | 15.31 | 15.54  | 14.32 | 10.63 | 15.29 | 7.95  |
| N    | 4.51  | 0.67  | 23.92 | 34.79 | 41.14  | 41.26 | 1.37  | 1.62  | 4.49  |
| N    | -1.23 | -0.43 | 3.75  | 4.03  | 4.18   | 3.63  | 0.00  | -0.92 | -1.28 |
| N    | 1.58  | 0.66  | 1.59  | 7.11  | 5.90   | 0.32  | 3.83  | 4.03  | 3.84  |
| N    | 2.52  | 0.45  | 4.10  | 7.92  | 8.38   | 3.72  | 1.11  | -0.96 | 0.00  |
| Y(M) | -1.35 | 0.93  | 17.17 | 35.97 | 32.70  | 37.09 | 2.56  | 0.73  | 1.67  |
| N    | 2.87  | 1.45  | 15.15 | 31.87 | 25.90  | 33.67 | 2.17  | 2.66  | 2.72  |
| N    | 2.31  | -1.28 | 13.11 | 21.67 | 21.41  | 19.60 | -3.93 | -2.06 | 4.35  |
| N    | 1.75  | 2.26  | 8.62  | 19.63 | 23.27  | 18.70 | 0.71  | 0.12  | 3.52  |
| N    | 8.78  | 0.86  | 23.20 | 74.35 | 91.33  | 83.80 | 0.73  | 2.24  | -0.02 |
| N    | 2.16  | 0.71  | 5.11  | 11.44 | 8.21   | 9.81  | 0.53  | -0.58 | 0.86  |
| N    | 3.49  | -0.38 | 21.84 | 38.98 | 45.52  | 39.78 | 4.30  | 3.96  | 0.17  |
| N    | 5.05  | 2.30  | 16.74 | 26.12 | 23.75  | 28.38 | -0.27 | 3.28  | 1.90  |
| Y(L) | 0.88  | 1.66  | 15.28 | 26.46 | 23.06  | 28.60 | -0.86 | 1.11  | 0.99  |
| Y(L) | 1.77  | 1.57  | 9.40  | 17.13 | 16.33  | 18.63 | 2.43  | 2.93  | 3.82  |
| N    | 1.90  | 1.48  | 17.44 | 28.74 | 29.58  | 32.42 | 1.33  | 2.83  | 5.42  |
| Y(M) | 3.79  | -0.36 | 25.02 | 36.47 | 42.12  | 42.17 | -1.93 | -1.33 | 6.63  |
| Y(H) | 2.87  | 0.74  | 6.19  | 10.50 | 15.65  | 12.44 | 1.76  | 1.42  | 3.60  |
| Y(L) | 3.79  | 1.44  | 19.00 | 44.76 | 39.47  | 47.56 | -2.93 | -1.29 | 3.55  |
| N    | -1.30 | -0.37 | 12.73 | 28.57 | 23.83  | 31.82 | 0.50  | 0.95  | 7.01  |
| N    | 6.95  | 5.52  | 28.20 | 37.64 | 29.95  | 40.88 | 6.06  | 6.20  | 8.54  |
| N    | 2.13  | 2.09  | 5.13  | 17.23 | 16.16  | 21.39 | 4.43  | 2.58  | 2.33  |
| N    | 2.93  | 1.69  | 17.83 | 33.60 | 38.28  | 30.96 | 2.63  | 3.35  | 2.89  |
| N    | 6.36  | 1.64  | 34.44 | 56.79 | 41.83  | 57.05 | -3.56 | -1.81 | 2.16  |
| N    | -0.92 | 0.09  | 4.74  | 15.65 | 16.24  | 16.74 | -0.08 | 0.30  | 2.84  |
| N    | 1.56  | 1.26  | 6.71  | 15.05 | 10.14  | 13.87 | 0.68  | 1.28  | 7.08  |
| N    | 4.27  | 1.78  | 12.13 | 25.58 | 18.79  | 21.28 | 0.70  | -0.25 | 1.88  |



|      |       |       |       |       |       |       |       |       |       |
|------|-------|-------|-------|-------|-------|-------|-------|-------|-------|
| N    | -0.73 | 1.32  | 6.87  | 7.62  | 9.37  | 6.52  | -1.32 | -2.08 | -3.41 |
| N    | -4.13 | 0.96  | 3.06  | 7.84  | 12.58 | 8.25  | 0.71  | 1.13  | 0.70  |
| Y(M) | 2.42  | 2.81  | 10.17 | 16.72 | 16.94 | 12.00 | 1.70  | 2.66  | 4.01  |
| N    | 6.81  | 3.14  | 20.82 | 37.38 | 30.07 | 26.84 | 14.29 | 1.98  | 5.79  |
| N    | 0.95  | 0.51  | 13.05 | 25.82 | 19.00 | 23.29 | 3.09  | 2.63  | 0.50  |
| N    | 1.16  | 1.54  | 11.32 | 13.37 | 12.07 | 14.96 | -1.50 | 1.32  | 7.61  |
| N    | 0.26  | 3.69  | 6.78  | 7.64  | 19.42 | 11.43 | 0.49  | -1.51 | 0.38  |
| N    | 0.60  | 0.42  | 3.93  | 7.61  | 6.01  | 9.57  | 0.13  | -2.47 | -0.15 |
| N    | 7.21  | 4.04  | 22.32 | 40.63 | 36.63 | 44.13 | 2.03  | 2.57  | 7.51  |
| N    | 2.24  | 2.36  | 21.26 | 16.65 | 20.71 | 20.75 | 3.51  | 4.22  | 3.99  |
| Y(H) | 5.26  | 2.28  | 6.40  | 32.57 | 57.06 | 45.73 | 1.54  | 0.94  | 1.95  |
| N    | -0.85 | 0.90  | 13.45 | 27.41 | 25.70 | 32.22 | 0.16  | 1.95  | 0.36  |
| N    | 3.11  | 1.92  | 12.76 | 22.80 | 26.52 | 26.28 | 2.72  | 3.80  | 3.29  |
| N    | 4.31  | 3.07  | 25.04 | 44.26 | 37.28 | 45.52 | 2.90  | 2.21  | 5.55  |
| N    | 6.41  | 4.02  | 25.68 | 37.86 | 39.93 | 38.37 | 5.21  | 6.21  | 8.93  |
| N    | 3.86  | -1.80 | 11.03 | 31.28 | 22.91 | 31.50 | 0.76  | 0.06  | 3.43  |
| N    | 6.29  | 4.17  | 20.61 | 25.32 | 29.98 | 29.51 | 1.33  | 3.31  | 4.99  |
| N    | -0.69 | 0.83  | 8.45  | 18.25 | 15.57 | 18.01 | 0.09  | 0.08  | 2.63  |
| N    | 1.23  | 1.43  | 18.49 | 26.33 | 23.58 | 28.64 | 0.42  | 0.80  | 0.88  |
| N    | 0.24  | 1.60  | 14.92 | 15.35 | 11.64 | 15.39 | 2.38  | 1.26  | 0.67  |
| N    | 2.41  | 2.40  | 9.49  | 13.98 | 11.47 | 15.97 | 1.37  | -0.05 | 0.90  |
| Y(M) | 2.48  | 0.77  | 22.24 | 27.46 | 25.26 | 35.19 | 0.68  | 0.25  | 1.04  |

| PI(3,4)P2 | PI(3,5)P2 | PI(4,5)P2 | PI(3,4,5)P3 | Phosphatidic Acid | Phosphatidylserine | Blank | CNI sequence             |
|-----------|-----------|-----------|-------------|-------------------|--------------------|-------|--------------------------|
| 17.58     | 21.30     | 28.84     | 30.21       | 18.69             | 25.84              | 6.31  | ATGGTGGTAGCATCCGACATCAG  |
| 43.98     | 42.98     | 39.77     | 38.39       | 30.92             | 64.39              | 3.08  | CCTGTCCACCAGAACCATGTCTG  |
| 51.88     | 56.00     | 53.80     | 71.16       | 30.38             | 23.36              | 2.97  | GACATTGATCCTCGCCGGACTGC  |
| 57.72     | 17.65     | 27.71     | 53.94       | 13.09             | 36.17              | 2.76  | CTCACCATCTCTGAGCGGTGGCA  |
| 41.15     | 34.09     | 44.55     | 49.28       | 17.34             | 15.71              | 5.95  | TATGAGTCATATGATGAAGAGGA  |
| 19.79     | 17.27     | 23.22     | 16.76       | 11.56             | 39.89              | 3.31  | AAAGTGGCAAGTTACGAGAAGAA  |
| 23.45     | 15.72     | 19.18     | 31.91       | 14.92             | 33.18              | 3.04  | ATGAACGACGTAGCCATTGTGAA  |
| 58.82     | 19.04     | 23.65     | 68.35       | 18.52             | 23.74              | 3.36  | ATGAATGAGGTATCTGTCACTAAA |
| 162.99    | 12.26     | 26.80     | 162.02      | 7.30              | 10.01              | 2.55  | ATGAGCGATGTTACCATTGTGAAA |
| 19.62     | 15.60     | 32.39     | 20.97       | 21.31             | 53.35              | 4.80  | TATACTGTGTTAAAAACCTCAG   |
| 25.20     | 21.09     | 28.06     | 23.30       | 14.74             | 36.96              | -1.38 | AAAGTCAGTGAGTATGAGAAGGA  |
| 14.32     | 13.39     | 19.00     | 15.73       | 10.27             | 37.66              | 6.37  | TATCATCAAGGCCACGAGCTTTC  |
| 20.47     | 19.02     | 22.25     | 23.95       | 17.18             | 26.39              | 3.71  | GGACTAGTGAAGGAGTTGTTGTC  |
| 3.77      | 5.41      | 4.11      | 2.61        | 5.79              | 3.73               | 3.15  | AAGACTGGGGAATCGGAATGCCG  |
| 7.11      | 6.17      | 6.57      | 8.63        | 12.06             | 7.46               | 4.18  | GTTTCGCAAGAGGAAGGAGCTGGA |
| 41.50     | 39.57     | 48.85     | 69.57       | 25.90             | 51.78              | 8.75  | ATGGCTGCAGTGATACTGGAGAG  |
| 20.83     | 19.68     | 22.68     | 28.93       | 18.49             | 32.56              | 2.03  | GCCTTGGAAGACAAGGAACTCGG  |
| 21.08     | 15.40     | 29.19     | 24.10       | 13.35             | 19.68              | 1.33  | GCTGAGTTGGACCAGCTTGTGAT  |
| 42.86     | 17.40     | 24.96     | 37.39       | 15.61             | 52.99              | 2.20  | GAACCCGTGCACAGTACCCCTA   |
| 17.53     | 15.70     | 19.27     | 19.11       | 9.03              | 31.43              | 0.06  | GAACGTCCACTTCACTACACAGA  |
| 22.90     | 18.50     | 25.67     | 19.56       | 19.51             | 47.93              | 3.01  | CCTGAGGCCCCACGCCCTGG     |
| 23.41     | 16.25     | 22.64     | 18.69       | 14.73             | 47.44              | 0.22  | ATGGAGGCCATGCTGTTGTACTT  |
| 7.16      | 2.26      | 10.59     | 10.65       | 8.14              | 16.91              | 5.50  | GGCCTGCCAGCTGAATATGCCAC  |
| 70.45     | 62.15     | 86.08     | 86.33       | 31.86             | 56.15              | -0.05 | CAAGACATCATGGGCACACCTGT  |
| 17.52     | 13.29     | 13.31     | 17.77       | 19.95             | 19.34              | 16.94 | ATGTCGGATAACCAGAGCTGGAA  |
| 105.77    | 28.35     | 30.89     | 95.23       | 21.59             | 35.51              | 3.97  | GCAAATCAGCCTTTGATTGGAAG  |
| 19.04     | 12.85     | 22.15     | 24.18       | 15.52             | 31.95              | 3.04  | GATCTAATAAAATCCTCTCTCAA  |
| 41.28     | 37.89     | 45.80     | 40.82       | 28.39             | 64.10              | 3.22  | ACCATCCTCAAAGAAGGCATGCT  |
| 5.09      | 9.02      | 9.96      | 12.69       | 12.00             | 18.72              | 2.86  | AAGACTTCAGGGAACAGGTGCA   |
| 21.04     | 23.70     | 25.24     | 30.69       | 22.18             | 38.67              | 3.99  | ACCAAGGACCAGATTCTTCTCTG  |
| 25.67     | 19.82     | 22.52     | 27.22       | 19.07             | 34.26              | 3.39  | ATGGACGGGGCTGTGATGGAGG   |
| 28.92     | 35.78     | 38.60     | 48.62       | 35.02             | 40.71              | 3.39  | ATGGCCGACCAATTTCAACGACAT |
| 39.24     | 27.87     | 50.08     | 38.01       | 28.41             | 56.85              | 10.78 | AATTTAATGACATAGTGAAGCAG  |
| 25.97     | 24.29     | 28.13     | 26.06       | 20.20             | 43.10              | 4.92  | GCGCTGGCGGAGATCACAGAGAT  |
| 16.89     | 14.22     | 16.88     | 21.55       | 18.66             | 30.33              | 7.40  | AACAAGTCCCGGATGAAGCCAC   |
| 19.28     | 21.55     | 23.79     | 30.39       | 19.79             | 24.01              | 5.87  | GCCATCCGAAAATGGAACGAAT   |
| 9.20      | 11.61     | 12.63     | 18.89       | 4.51              | 24.55              | 3.99  | ATGGAACGAATGCACAAGCTGCT  |
| 20.37     | 17.21     | 20.20     | 18.02       | 11.38             | 37.68              | 6.05  | GCACCTGGGAGCAGTCCAGCCT   |
| 14.39     | 12.67     | 16.03     | 20.10       | 14.32             | 19.67              | 0.52  | GAAGATGCCAGAGAGCACTGGA   |
| 14.38     | 14.34     | 16.13     | 23.89       | 16.44             | 23.89              | 0.30  | CCCAGGGATGCCCCAGACCGGA   |
| 24.45     | 28.21     | 32.84     | 41.02       | 21.73             | 37.31              | 4.40  | ACCATGAAGCAAGGGGACAACCT  |
| 11.81     | 11.10     | 16.51     | 16.25       | 17.40             | 14.06              | 6.36  | TTAGATCACAGCTGTGCGCTAG   |
| 44.53     | 39.88     | 48.47     | 45.26       | 36.52             | 73.24              | 5.15  | ACCATGAAGCAAGGGGACAACCT  |
| 41.00     | 18.92     | 20.44     | 44.94       | 24.86             | 41.17              | 7.95  | ATGAGCGCGGGCGGAAAGTGGTTG |
| 53.54     | 20.76     | 29.70     | 54.79       | 22.49             | 35.95              | 2.86  | ATGAGCGCGGGCGGCGGCGACG   |
| 16.21     | 21.72     | 17.80     | 25.54       | 19.90             | 40.99              | 5.82  | ATGATGTCCCTGGGGAGACTTCG  |
| 13.92     | 11.26     | 16.07     | 18.13       | 10.79             | 25.11              | 1.54  | TTCTTATTGAGAAAGAATTATGCG |
| 22.37     | 19.90     | 24.69     | 20.44       | 15.29             | 36.07              | 3.06  | GCCAAATATGAATTTTTAAGAAC  |
| 16.96     | 16.47     | 23.71     | 25.13       | 15.93             | 36.35              | 4.25  | CGTAAAACTTCGCCAAGTATGAA  |
| 65.78     | 42.18     | 74.17     | 68.12       | 18.67             | 22.18              | 1.94  | ATGGCGAGCCCCCGGATACCG    |
| 34.51     | 28.00     | 36.17     | 56.49       | 32.19             | 44.19              | 4.42  | ATGAACAACCTTATCCTCCTGGAA |
| 11.96     | 12.19     | 18.28     | 17.63       | 7.60              | 9.00               | 4.79  | GGAGTTCGAGAGAAGGAGAAGCT  |

|        |       |        |        |       |       |       |                          |
|--------|-------|--------|--------|-------|-------|-------|--------------------------|
| 16.61  | 19.96 | 21.16  | 25.77  | 21.25 | 51.55 | 8.34  | GGAGTCCGGGAGAAGGAAAATTC  |
| 43.71  | 17.03 | 23.80  | 19.09  | 16.01 | 30.69 | 4.17  | GCCATGCATGTCAGCATGCTGGA  |
| 14.55  | 12.57 | 15.31  | 15.97  | 14.65 | 22.77 | 2.42  | CCCTGCTCCCGGCCCGCCAGCC   |
| 22.00  | 21.05 | 23.90  | 25.21  | 18.32 | 31.71 | 6.75  | CCAGAAGCCAACTCTCGTGCCTC  |
| 27.34  | 28.44 | 29.95  | 29.58  | 24.87 | 49.70 | 1.86  | TCCATGCATCTCATCGCCATCACT |
| 4.56   | 8.34  | 7.96   | 7.61   | 8.19  | 26.11 | 1.56  | GGTGAAGGAACTACTAAATTTAAA |
| 10.75  | 11.76 | 13.28  | 15.49  | 11.01 | 14.35 | 7.54  | ATGTCGGCGGCCAAGGAAAACCC  |
| 13.63  | 16.24 | 15.35  | 14.13  | 11.15 | 16.92 | 5.00  | GCCATCCCTAGAAAGCGGGACTT  |
| 15.97  | 9.91  | 38.36  | 105.90 | 5.45  | 8.62  | 2.35  | CAGGAAGCCCTCAAGCAAGGCTG  |
| 9.96   | 10.84 | 10.70  | 10.00  | 9.57  | 3.80  | 0.43  | TACACCCAGAGGAGATGCACCA   |
| 34.44  | 16.88 | 35.25  | 61.03  | 10.48 | 38.57 | -0.91 | CAGGAAGCCCTCAAGCAAGGCTG  |
| 18.44  | 17.14 | 22.27  | 22.39  | 14.53 | 33.22 | 1.65  | AAGAAAAGCGCAATCTGAGTGTCA |
| 10.62  | 10.70 | 11.51  | 20.28  | 14.18 | 22.27 | -1.16 | ATCCTGAAGAGAGTGGAGGAGAG  |
| 15.06  | 10.98 | 12.47  | 18.25  | 12.06 | 25.93 | 7.11  | AACAGCTTGACTGTGGAGCTCAC  |
| 91.61  | 91.08 | 90.29  | 108.13 | 46.20 | 27.42 | 2.99  | ATGAGTGACGAGAAGAATCTCGG  |
| 20.80  | 23.49 | 25.15  | 28.90  | 18.09 | 39.35 | 2.32  | CAGAAGACTGACCCCGGAAAGT   |
| 38.58  | 33.34 | 43.34  | 48.22  | 24.11 | 51.51 | 0.70  | ATGGACTTCCAGGAAGAGACAC   |
|        |       |        |        |       |       |       | CAGAGGTCGGGCAGCAACATAGA  |
| 134.11 | 38.39 | 57.56  | 138.93 | 22.51 | 24.42 | 0.13  | GAAGTCAAGTCCCGGAAAAGCA   |
| 1.07   | 3.21  | 3.09   | 2.13   | 5.09  | 12.81 | 3.94  | AAGCCCTCATAGCACTGGGAGCTC |
| 13.97  | 9.24  | 72.80  | 32.25  | 4.92  | 14.64 | -0.45 | ATGGACTCCGGTCCGGACTTCTCT |
| 30.26  | 31.01 | 31.41  | 30.63  | 22.34 | 49.77 | 2.77  | ATGACATCTCAGATTCAAGACCTA |
| 14.46  | 12.36 | 29.60  | 22.80  | 14.42 | 24.33 | 2.24  | GGTCCGGTCCCCAGGGACAGCA   |
| 7.10   | 4.85  | 8.73   | 10.51  | 9.16  | 16.40 | 1.40  | ATCCAGGAAGAGCAGTTCTTTGG  |
| 6.49   | 9.88  | 9.41   | 12.98  | 16.73 | 8.19  | 2.81  | CAACTTTCCTTTATCCAGACCTT  |
| 15.89  | 14.64 | 14.92  | 20.37  | 14.04 | 34.00 | 3.44  | ATGGAGGACGGCGTGCTCAAGG   |
| 100.79 | 12.22 | 11.25  | 22.36  | 14.03 | 37.06 | 3.61  | GAGCAGTTTCTGGATGACTCCAC  |
|        |       |        |        |       |       |       | ATGACTGACATTGTTGGTGGTGT  |
| 17.34  | 17.90 | 15.98  | 18.22  | 24.55 | 16.63 | 9.68  | ATGCCTTATGTGGATCCGGCAGAA |
| 35.45  | 11.98 | 22.07  | 29.73  | 29.39 | 35.67 | 0.70  | AGCCAGAACGGTGGGGATGGGC   |
| 24.92  | 22.38 | 28.26  | 27.50  | 27.67 | 70.77 | 2.28  | ATGCCTTATGTGGATCCGGCAGAA |
| 11.14  | 10.64 | 11.98  | 11.62  | 14.83 | 13.27 | 7.96  | ATGGAGGGGTTCTGTACAAGTG   |
| 32.88  | 26.62 | 36.89  | 28.97  | 28.18 | 50.90 | -0.42 | TCCAATTCATTTAAAAGGAACCTT |
| 1.42   | 1.26  | 3.16   | 2.17   | -0.31 | 5.64  | -0.05 | ATGAGCCCGGCAACCCCGGTTCC  |
| -1.04  | 0.70  | 0.18   | 2.93   | 4.31  | 3.59  | -1.88 | ATGGCGTTCTGTGAAGAGTGGATG |
| 9.73   | 6.14  | -0.36  | 11.86  | 4.77  | 5.36  | 0.42  | ATCAATAAGCTGTCAATCATGACA |
| 28.40  | 25.88 | 26.01  | 27.30  | 26.23 | 49.35 | 1.24  | ATGGTGGACCACTTGCAACACAC  |
| 16.18  | 23.50 | 24.78  | 28.74  | 16.45 | 38.43 | 3.49  | ATGCGGTACAACGAGAAAGGTT   |
| 34.03  | 23.96 | 33.57  | 32.64  | 16.34 | 30.11 | 0.26  | CTGTCCAACCCATTCCGGGCGCT  |
| 20.14  | 14.74 | 20.10  | 18.05  | 13.14 | 38.58 | 3.59  | CTGGCGTTGGCGAAATTTGTCCG  |
| 67.81  | 60.38 | 78.36  | 85.55  | 43.38 | 45.05 | 7.88  | ATGAAGAAGAGCGGCTCCGGCAA  |
| 7.80   | 3.20  | 5.90   | 10.20  | 3.70  | 4.80  | 0.46  | AGTGGATTCTTCTGTGAGGAGAA  |
| 27.39  | 28.41 | 32.74  | 30.15  | 26.96 | 49.49 | 3.02  | GGCCAGAGTGGAGGTGCAGAGA   |
| 21.02  | 18.60 | 25.73  | 27.35  | 19.37 | 28.33 | 4.74  | GTGGAGAGATTATCGCCATGAA   |
| 28.37  | 23.32 | 31.54  | 38.88  | 22.00 | 31.76 | 4.17  | AAAATCCCGGAGGATGATGGGAA  |
| 24.91  | 17.62 | 32.10  | 132.63 | 9.67  | 19.04 | 3.96  | AAGATCCAGAAAGACGACGGAAA  |
| 28.25  | 30.42 | 30.48  | 38.46  | 17.07 | 42.20 | 0.69  | GAATGGGCCATTGATGAGGATGA  |
| 54.34  | 30.75 | 42.17  | 56.97  | 32.79 | 58.12 | 1.41  | GAATGGGCAGTAGATGATGAAGA  |
| 88.32  | 25.54 | 122.98 | 112.89 | 7.46  | 17.51 | 2.36  | GAGACCTCATGGCCGGCTTTTGA  |
| 28.80  | 33.09 | 30.86  | 35.98  | 34.58 | 38.34 | 5.50  | GGATGTCAGTCCAGAAAAAGTC   |
| 15.15  | 19.01 | 15.96  | 18.55  | 16.18 | 32.15 | 2.41  | GAGTCGTGGATGGAACCACTCCA  |
| 21.03  | 23.51 | 24.52  | 27.82  | 21.89 | 40.99 | 9.19  | CTGGGCCAGCAGCTGGGCCAGG   |
| 17.73  | 13.52 | 17.52  | 22.85  | 13.01 | 22.08 | 3.48  | ATGCAGAAAGCCATCCGGCTTAA  |
| 28.55  | 27.63 | 33.00  | 28.06  | 28.58 | 51.45 | 5.28  | GAAGTCAGTGAACCGGAGAACAT  |
| 30.77  | 10.82 | 18.29  | 32.69  | 22.68 | 87.16 | 0.17  | ATGCAGAAAGCCATCCGGCTTAA  |
| 10.15  | 9.85  | 9.68   | 16.18  | 13.95 | 17.64 | 1.90  | ATGCAGAAAGCGTGCCTACAA    |
| 8.43   | 8.33  | 9.99   | 12.28  | 8.26  | 16.37 | 3.42  | GAAGTCAGTGACACCGGAGAACAT |
| 16.94  | 12.08 | 14.50  | 26.57  | 12.99 | 30.19 | 3.72  | AAAGTCAGCGAATACGAGAAGAA  |

|       |       |       |        |       |       |       |                           |
|-------|-------|-------|--------|-------|-------|-------|---------------------------|
| 19.88 | 9.39  | 13.63 | 13.46  | 6.99  | 19.50 | 2.05  | ACACATAGAAATGAACCTCAAATG  |
| 6.50  | 9.65  | 8.29  | 9.69   | 4.96  | 6.79  | 5.16  | AACTCCTCGGGTGGTGCTGGGAC   |
| 25.87 | 19.02 | 26.57 | 22.46  | 6.94  | 14.66 | 4.21  | CGAAAGGGATTCTGGCTGCGTAA   |
| 29.29 | 21.92 | 23.64 | 30.84  | 14.87 | 28.94 | 4.56  | ATGGCGGCTGAGGAGATGCAGT    |
| 13.67 | 13.91 | 17.79 | 19.39  | 13.04 | 29.89 | 6.01  | GACGGCGATGAATATGACGATCC   |
| 13.56 | 15.43 | 14.42 | 15.10  | 15.17 | 21.05 | 5.78  | GAGATCTGTGCAGCGGACGGCC    |
| 7.38  | 6.77  | 7.60  | 10.47  | 7.22  | 15.74 | 0.80  | GACTTGCTGACCCGTGTGGTTGC   |
| 8.82  | 5.32  | 3.54  | 7.50   | 5.03  | 8.67  | 2.01  | TCTCCTGATAGCAGGAACACCTT   |
| 32.94 | 34.23 | 36.22 | 41.08  | 23.69 | 42.37 | 4.87  | ATTTGCTCCAAAAGTCTTGCAAAA  |
| 16.17 | 15.75 | 20.19 | 20.45  | 9.88  | 31.96 | 6.19  | ATTTACAAGCAGCACTCCCCCAG   |
| 13.84 | 24.62 | 54.79 | 24.95  | 8.62  | 8.29  | -0.91 | GCAGGAACCATGGAAACGAGTGA   |
| 19.45 | 18.90 | 17.37 | 22.02  | 16.14 | 30.37 | 1.80  | CATTACAAAATAAACTTTGATGAC  |
| 45.50 | 24.37 | 36.63 | 131.17 | 7.80  | 18.71 | 6.16  | ATGAATTTCAACACTATCCTAGAA  |
| 34.20 | 33.40 | 33.33 | 37.43  | 18.87 | 36.25 | 2.22  | CGCCAGGGGGTGTACGAGAACTT   |
| 26.09 | 30.13 | 35.03 | 25.94  | 18.49 | 43.99 | 7.79  | AGCGAGGAACACTACCACCTGGA   |
| 14.45 | 14.04 | 16.55 | 26.79  | 13.57 | 34.09 | 5.50  | CCCTCCGACAGAACATCTATGA    |
| 24.18 | 20.88 | 24.33 | 19.09  | 15.74 | 38.98 | 7.43  | GGAGAGTGGAAAAGCATTGGTT    |
| 12.56 | 11.59 | 13.84 | 16.50  | 12.24 | 16.66 | 1.23  | ACAGAGAAGGAGAACCTGCGGTT   |
| 29.57 | 19.21 | 28.72 | 30.49  | 13.86 | 27.85 | 0.52  | GTGAAGCGGGACAAGGAGACCTT   |
| 7.77  | 3.64  | 6.69  | 13.18  | 5.26  | 19.88 | 1.29  | GTGAAGCGGGACAAGGAGACCTT   |
| 8.28  | 5.42  | 7.57  | 11.54  | 9.58  | 19.68 | 2.10  | GTA AAAAGAGATAATGAGACCCTT |
| 21.85 | 20.95 | 23.49 | 24.80  | 19.45 | 41.49 | 2.56  | GATCTGGAGCAGCTTCAGCTCCA   |

Type of file: table

Label: Table 3

Filename: mmc9.xls

Supplementary Table 3, Park et al:  
 Mouse PH-domains -number of criteria met from Isakoff et al. (1998)

|                   | Translocating? | 8-criteria | 3-criteria | Criteria 1 | Criteria 2 | Criteria 3 | Criteria 4 | Criteria 5 | Criteria 6 | Criteria 7 | Criteria 8 |
|-------------------|----------------|------------|------------|------------|------------|------------|------------|------------|------------|------------|------------|
| 2610034M16Rik-PH  | N              | 7          | 3          | 1          | 1          | 1          | 0          | 1          | 1          | 1          | 1          |
| 2610034M16Rik-PH2 | N              | 3          | 0          | 1          | 1          | 0          | 0          | 1          | 0          | 0          | 1          |
| ABR-PH            | N              | 4          | 2          | 0          | 0          | 0          | 1          | 1          | 0          | 1          | 1          |
| ADRPK1-PH         | N              | 6          | 2          | 1          | 0          | 1          | 1          | 1          | 1          | 0          | 1          |
| AFAP-PH           | N              | 2          | 0          | 0          | 1          | 0          | 0          | 1          | 0          | 0          | 1          |
| AKAP13-PH         | N              | 3          | 1          | 0          | 0          | 0          | 1          | 1          | 0          | 1          | 1          |
| APBB1IP-PH        | N              | 6          | 2          | 1          | 1          | 0          | 0          | 1          | 1          | 1          | 1          |
| ARFGEF18-PH       | N              | 2          | 1          | 0          | 0          | 0          | 0          | 1          | 0          | 1          | 0          |
| ARHGAP10-PH       | N              | 3          | 0          | 1          | 1          | 0          | 0          | 1          | 0          | 0          | 1          |
| ARHGEF2-PH        | N              | 3          | 1          | 0          | 0          | 0          | 0          | 1          | 1          | 1          | 0          |
| ARHGEF3-PH        | N              | 3          | 0          | 1          | 1          | 0          | 0          | 1          | 0          | 0          | 1          |
| ARHGEF7-PH        | N              | 4          | 1          | 1          | 0          | 0          | 0          | 1          | 1          | 0          | 1          |
| CADPS-PH          | N              | 7          | 2          | 1          | 1          | 0          | 1          | 1          | 1          | 1          | 0          |
| CENTB5-PH         | N              | 7          | 2          | 1          | 1          | 1          | 1          | 1          | 1          | 0          | 0          |
| CENTD1-PH         | N              | 4          | 0          | 1          | 1          | 0          | 1          | 1          | 0          | 0          | 1          |
| CENTD1-PH2        | N              | 4          | 1          | 1          | 1          | 0          | 0          | 1          | 0          | 0          | 0          |
| CENTD2-PH         | N              | 6          | 2          | 1          | 1          | 1          | 1          | 1          | 0          | 0          | 1          |
| CENTD2-PH2        | N              | 5          | 1          | 1          | 1          | 0          | 0          | 1          | 1          | 0          | 0          |
| CIT-PH            | N              | 3          | 0          | 1          | 1          | 0          | 0          | 1          | 0          | 0          | 1          |
| COL4ABP3-PH       | N              | 4          | 2          | 1          | 0          | 1          | 0          | 1          | 0          | 0          | 1          |
| DDEF1-PH          | N              | 6          | 2          | 1          | 1          | 1          | 1          | 1          | 0          | 0          | 0          |
| DGKD-PH           | N              | 6          | 3          | 1          | 0          | 1          | 0          | 1          | 1          | 1          | 0          |
| DNM1-PH           | N              | 5          | 1          | 1          | 1          | 0          | 0          | 1          | 1          | 1          | 0          |
| DNM2-PH           | N              | 5          | 1          | 1          | 1          | 0          | 0          | 1          | 1          | 1          | 1          |
| DOK1-PH           | N              | 5          | 1          | 1          | 1          | 0          | 1          | 1          | 0          | 1          | 1          |
| DOK4-PH           | N              | 6          | 1          | 1          | 1          | 0          | 1          | 1          | 1          | 1          | 1          |
| DOK5-PH           | N              | 5          | 0          | 1          | 1          | 0          | 1          | 1          | 1          | 0          | 0          |
| FARP1-PH          | N              | 6          | 2          | 0          | 1          | 1          | 1          | 1          | 1          | 0          | 0          |
| FARP1-PH2         | N              | 3          | 0          | 1          | 1          | 0          | 0          | 1          | 0          | 0          | 0          |
| FGD1-PH           | N              | 7          | 2          | 1          | 1          | 1          | 1          | 1          | 1          | 0          | 0          |
| FGD1-PHB          | N              | 7          | 2          | 1          | 1          | 1          | 1          | 1          | 1          | 0          | 1          |
| FGD1-PH2          | N              | 4          | 0          | 1          | 1          | 0          | 0          | 1          | 1          | 0          | 1          |
| FGD2-PH           | N              | 7          | 2          | 1          | 1          | 1          | 1          | 1          | 1          | 0          | 0          |
| FGD3-PH           | N              | 7          | 2          | 1          | 1          | 1          | 1          | 1          | 1          | 0          | 0          |
| FGD6-PH           | N              | 6          | 2          | 0          | 1          | 1          | 1          | 1          | 1          | 0          | 0          |
| GEFT-PH           | N              | 6          | 2          | 1          | 1          | 0          | 1          | 1          | 0          | 1          | 1          |
| GRB10-PH          | N              | 4          | 1          | 1          | 1          | 0          | 0          | 1          | 0          | 1          | 1          |
| GRB14-PH          | N              | 5          | 1          | 1          | 1          | 0          | 0          | 1          | 1          | 1          | 0          |
| GRB7-PH           | N              | 5          | 1          | 1          | 1          | 0          | 1          | 1          | 0          | 1          | 1          |

|              |   |   |   |   |   |   |   |   |   |   |   |
|--------------|---|---|---|---|---|---|---|---|---|---|---|
| IRS1-PH      | N | 4 | 2 | 0 | 0 | 1 | 0 | 1 | 1 | 0 | 1 |
| ITSN1-PH     | N | 3 | 2 | 0 | 0 | 1 | 0 | 1 | 0 | 1 | 1 |
| ITSN2-PH     | N | 3 | 2 | 0 | 0 | 1 | 0 | 1 | 0 | 1 | 1 |
| KALRN-PH     | N | 6 | 2 | 1 | 1 | 0 | 0 | 1 | 1 | 1 | 0 |
| KIF1A-PH     | N | 3 | 1 | 1 | 0 | 0 | 0 | 1 | 0 | 0 | 1 |
| KIF1B-PH     | N | 2 | 0 | 1 | 0 | 0 | 0 | 1 | 0 | 0 | 0 |
| MCF21-PH     | N | 5 | 1 | 1 | 1 | 0 | 0 | 1 | 1 | 0 | 1 |
| MCF2-PH      | N | 4 | 1 | 1 | 1 | 0 | 0 | 0 | 1 | 0 | 0 |
| M-RIP-PH     | N | 6 | 1 | 1 | 1 | 0 | 1 | 1 | 1 | 0 | 0 |
| M-RIP-PH2    | N | 4 | 2 | 0 | 0 | 1 | 0 | 1 | 1 | 1 | 0 |
| MYO10-PH2    | N | 7 | 3 | 1 | 1 | 1 | 0 | 1 | 1 | 1 | 1 |
| NET1-PH      | N | 2 | 0 | 0 | 0 | 0 | 1 | 1 | 0 | 0 | 1 |
| NGEF-PH      | N | 6 | 1 | 1 | 1 | 0 | 1 | 1 | 1 | 1 | 0 |
| OPHN1-PH     | N | 3 | 0 | 1 | 1 | 0 | 0 | 1 | 0 | 0 | 0 |
| OSBPL5-PH    | N | 3 | 0 | 0 | 1 | 0 | 1 | 1 | 0 | 0 | 1 |
| PLCD1-PH     | N | 4 | 3 | 0 | 0 | 1 | 0 | 1 | 0 | 1 | 0 |
| PLCD4-PH     | N | 6 | 2 | 1 | 1 | 0 | 0 | 1 | 1 | 1 | 1 |
| PLCL2-PH     | N | 5 | 2 | 1 | 1 | 1 | 0 | 0 | 1 | 0 | 1 |
| PLD1-PH      | N | 7 | 2 | 1 | 1 | 1 | 1 | 1 | 1 | 0 | 0 |
| PLD2-PH      | N | 7 | 2 | 1 | 1 | 1 | 1 | 1 | 1 | 0 | 1 |
| PLEKHA2-PH   | N | 4 | 1 | 1 | 0 | 0 | 0 | 1 | 1 | 0 | 0 |
| PLEKHA3-PH   | N | 5 | 2 | 1 | 0 | 1 | 0 | 1 | 1 | 0 | 0 |
| PLEKHA5-PH   | N | 7 | 3 | 1 | 1 | 1 | 0 | 1 | 1 | 1 | 1 |
| PLEKHB1-PH   | N | 6 | 1 | 1 | 1 | 0 | 1 | 1 | 1 | 1 | 0 |
| PLEKHB2-PH   | N | 6 | 1 | 1 | 1 | 0 | 1 | 1 | 1 | 1 | 1 |
| PLEKHC1-PH   | N | 4 | 1 | 1 | 1 | 0 | 0 | 1 | 0 | 1 | 1 |
| PLEKHF1-PH   | N | 6 | 3 | 0 | 1 | 1 | 0 | 1 | 1 | 1 | 0 |
| PLEKHJ1-PH   | N | 6 | 2 | 1 | 1 | 0 | 1 | 1 | 0 | 1 | 0 |
| PLEKHM1-PH   | N | 3 | 1 | 0 | 0 | 0 | 1 | 1 | 0 | 1 | 0 |
| PLEKHM2-PH   | N | 5 | 1 | 1 | 1 | 0 | 1 | 1 | 0 | 1 | 0 |
| PLEKHO1-PH   | N | 6 | 3 | 1 | 1 | 1 | 0 | 1 | 0 | 1 | 0 |
| PLEK-PH      | N | 5 | 2 | 1 | 0 | 1 | 1 | 1 | 0 | 1 | 0 |
| PLEK-PH2     | N | 8 | 3 | 1 | 1 | 1 | 1 | 1 | 1 | 1 | 1 |
| PRKCM-PH     | N | 4 | 1 | 1 | 1 | 0 | 0 | 1 | 0 | 1 | 1 |
| PSD2-PH      | N | 4 | 1 | 1 | 1 | 0 | 0 | 1 | 0 | 1 | 1 |
| PSD3-PH      | N | 4 | 1 | 1 | 1 | 0 | 0 | 1 | 0 | 1 | 0 |
| RALGPS2-PH   | N | 3 | 0 | 1 | 1 | 0 | 0 | 1 | 0 | 0 | 0 |
| RASA4-PH     | N | 5 | 1 | 1 | 1 | 0 | 0 | 1 | 1 | 1 | 1 |
| RASAL1-PH    | N | 7 | 3 | 1 | 1 | 1 | 0 | 1 | 1 | 1 | 1 |
| RASGRF1A-PH  | N | 5 | 1 | 1 | 0 | 1 | 1 | 1 | 1 | 0 | 1 |
| RASGRF1A-PH2 | N | 5 | 1 | 1 | 1 | 0 | 1 | 1 | 0 | 0 | 1 |
| RASGRF1B-PH  | N | 5 | 1 | 1 | 0 | 1 | 1 | 1 | 1 | 0 | 1 |
| RASGRF2-PH   | N | 5 | 1 | 1 | 0 | 1 | 1 | 1 | 1 | 0 | 0 |
| RASGRF2-PH2  | N | 5 | 1 | 1 | 1 | 0 | 1 | 1 | 0 | 0 | 1 |

|             |   |   |   |   |   |   |   |   |   |   |   |
|-------------|---|---|---|---|---|---|---|---|---|---|---|
| RGNEF-PH    | N | 2 | 1 | 0 | 0 | 0 | 0 | 1 | 0 | 1 | 0 |
| ROCK1-PH    | N | 4 | 1 | 1 | 1 | 0 | 0 | 1 | 0 | 1 | 0 |
| SH2B1-PH    | N | 5 | 0 | 1 | 1 | 0 | 1 | 1 | 1 | 0 | 0 |
| SH2B2-PH    | N | 3 | 0 | 1 | 0 | 0 | 0 | 1 | 1 | 0 | 0 |
| SKAP2-PH    | N | 5 | 2 | 1 | 1 | 1 | 0 | 1 | 0 | 0 | 0 |
| SNTA1-PH    | N | 1 | 0 | 0 | 0 | 0 | 0 | 1 | 0 | 0 | 0 |
| SNTB1-PH    | N | 4 | 1 | 1 | 1 | 0 | 0 | 1 | 0 | 1 | 0 |
| SNTB2-PH    | N | 5 | 1 | 1 | 1 | 0 | 1 | 1 | 0 | 1 | 0 |
| SOS1-PH     | N | 3 | 1 | 0 | 0 | 0 | 1 | 1 | 0 | 0 | 0 |
| SOS2-PH     | N | 3 | 1 | 0 | 0 | 0 | 1 | 1 | 0 | 0 | 0 |
| SPNB2-PH    | N | 3 | 0 | 1 | 1 | 0 | 0 | 1 | 0 | 0 | 0 |
| SWAP70-PH   | N | 7 | 2 | 1 | 1 | 1 | 1 | 1 | 1 | 0 | 0 |
| TIAM1-PH    | N | 4 | 1 | 1 | 1 | 0 | 0 | 1 | 0 | 1 | 1 |
| TIAM1-PH2   | N | 4 | 0 | 1 | 1 | 0 | 0 | 1 | 1 | 0 | 1 |
| TIAM2-PH    | N | 5 | 1 | 1 | 1 | 0 | 1 | 1 | 0 | 1 | 1 |
| TRIOBP-PH   | N | 2 | 1 | 0 | 0 | 0 | 0 | 0 | 1 | 1 | 0 |
| VAV1-PH     | N | 5 | 1 | 1 | 1 | 0 | 1 | 1 | 0 | 0 | 1 |
| VAV2-PH     | N | 5 | 1 | 1 | 0 | 0 | 1 | 1 | 1 | 0 | 1 |
| VAV2-PHB    | N | 5 | 1 | 1 | 0 | 0 | 1 | 1 | 1 | 0 | 1 |
| VAV3-PH     | N | 5 | 2 | 1 | 1 | 0 | 0 | 1 | 0 | 1 | 0 |
| VEPH-PH     | N | 6 | 2 | 1 | 1 | 0 | 0 | 1 | 1 | 1 | 0 |
| AKT1-PH     | Y | 8 | 3 | 1 | 1 | 1 | 1 | 1 | 1 | 1 | 1 |
| AKT2-PH     | Y | 8 | 3 | 1 | 1 | 1 | 1 | 1 | 1 | 1 | 1 |
| AKT3-PH     | Y | 8 | 3 | 1 | 1 | 1 | 1 | 1 | 1 | 1 | 1 |
| BTK-PH      | Y | 8 | 3 | 1 | 1 | 1 | 1 | 1 | 1 | 1 | 1 |
| CNKS2R2-PH  | Y | 6 | 2 | 1 | 1 | 1 | 0 | 1 | 1 | 1 | 0 |
| DAPP1-PH    | Y | 8 | 3 | 1 | 1 | 1 | 1 | 1 | 1 | 1 | 1 |
| FGD6-PH2    | Y | 5 | 1 | 1 | 1 | 0 | 0 | 1 | 1 | 1 | 1 |
| GAB1-PH     | Y | 8 | 3 | 1 | 1 | 1 | 1 | 1 | 1 | 1 | 1 |
| GAB2-PH     | Y | 8 | 3 | 1 | 1 | 1 | 1 | 1 | 1 | 1 | 1 |
| ITK-PH      | Y | 8 | 3 | 1 | 1 | 1 | 1 | 1 | 1 | 1 | 1 |
| MYO10-PH    | Y | 8 | 3 | 1 | 1 | 1 | 1 | 1 | 1 | 1 | 1 |
| OSBPL3-PH   | Y | 6 | 2 | 1 | 1 | 1 | 0 | 1 | 1 | 0 | 1 |
| OSBPL7-PH   | Y | 6 | 2 | 1 | 1 | 1 | 0 | 1 | 1 | 0 | 0 |
| PDK1-PH     | Y | 5 | 3 | 0 | 0 | 1 | 0 | 1 | 1 | 1 | 1 |
| PHLDB1-PH   | Y | 8 | 3 | 1 | 1 | 1 | 1 | 1 | 1 | 1 | 1 |
| PHLPP-PH    | Y | 4 | 1 | 1 | 1 | 0 | 0 | 1 | 0 | 0 | 1 |
| PLEK2-PH    | Y | 7 | 3 | 1 | 0 | 1 | 1 | 1 | 1 | 1 | 1 |
| PLEK2-PH2   | Y | 8 | 3 | 1 | 1 | 1 | 1 | 1 | 1 | 1 | 1 |
| PLEKHA1-PH  | Y | 7 | 3 | 1 | 1 | 1 | 1 | 0 | 1 | 1 | 1 |
| PLEKHA2-PH2 | Y | 7 | 3 | 1 | 1 | 1 | 1 | 0 | 1 | 1 | 1 |
| PSCD1-PH    | Y | 8 | 3 | 1 | 1 | 1 | 1 | 1 | 1 | 1 | 1 |
| PSCD2-PH    | Y | 8 | 3 | 1 | 1 | 1 | 1 | 1 | 1 | 1 | 1 |
| PSCD3-PH    | Y | 8 | 3 | 1 | 1 | 1 | 1 | 1 | 1 | 1 | 1 |



|           |   |   |   |   |   |   |   |   |   |   |   |
|-----------|---|---|---|---|---|---|---|---|---|---|---|
| RASA2-PH  | Y | 8 | 3 | 1 | 1 | 1 | 1 | 1 | 1 | 1 | 1 |
| SH3BP2-PH | Y | 5 | 2 | 1 | 0 | 1 | 1 | 1 | 0 | 0 | 1 |
| TEC-PH    | Y | 8 | 3 | 1 | 1 | 1 | 1 | 1 | 1 | 1 | 1 |

Type of file: table

Label: Table 4

Filename: mmc11.xls





|          |                     |                |   |                                                                                                                                      |
|----------|---------------------|----------------|---|--------------------------------------------------------------------------------------------------------------------------------------|
| Mouse    | GAB2_MOUSE          | GAB2-PH1       | T | MSGGGGDDVCTGWLKRSPEKLRRYAWKKRWFILRSGRMSGDPDVEYYKNEHSKPLRIINLNLCSEQVDAGLTFNKKELQDSFVFDIK                                              |
| Mouse    | ITK_MOUSE           | ITK-PH1        | T | MNNFILLLEEQLIKSQQRRTSPSNFKVRFVFLTKASLAYFEDRHGKRTKLSGSIELSRIKCVIIVKSDISIPCHYKYFQVVDHNYLLYFAPD                                         |
| Mouse    | P70316_MOUSE        | MYO10-PH1      | T | QEALKQGWLHKKGGSSSTLSRRNWKRWVFLRQSKLMYFENDSEEKLGTVERTAKEIIDNTSKENGIDIILADRTFHIAESPEDASQWF                                             |
| Mouse    | Q80UX3_MOUSE        | OSBPL3-PH1     | T | MSDEKNLGVSQKLVSRSSTSSCQSQKGRQSDWEVVEGLRGEIMTYTEPPVQKGFLLKKRWKPLKQHWKRRFFCLEKGIKYKQSQADIE                                             |
| Mouse    | Q3TAX1_MOUSE        | OSBPL7-PH1     | T | MDFQERDTPSLAESTQSSKPSQOASELQWVMEEPGRGLGADIMPERQEGHLLKKRWKPLKQHWKRYFVLEDGILHYATPRQDITKKG                                              |
| Mouse    | PDPK1_MOUSE         | PDPK1-PH1      | T | QRSGSNIEQYIHLDTNFSFELDLQFSEDEKRLLEKQAGNPWHQFVENNLILKMGVPDKRKLGFARRRQLL TEGPHLYYDPPVNVKLVKGE                                          |
| Mouse    | PHLB1_MOUSE         | PHLDB1-PH1     | T | EVKLREKQFSOARPLTRYLPNRKEDFDLKTTHIESGSHGVDTC LHVVLSSKVCRGYLIKMGGKIKSWKRRWVFDRLKRTLSYVDKHETKLLK                                        |
| Mouse    | PLEK2_MOUSE         | PLEK2-PH1      | T | MEDGVLEKGFVLRKHIVHNWAKARWVILRQNTLLYYKLEGGRRVTPPKGRVLDGCTITCPCLEYENRPLIKLKTTRTSTEYFLEACSREERD                                         |
| Mouse    | PLEK2_MOUSE         | PLEK2-PH2      | T | EQFLDDSTALYTFAESYKVKVSSKEEISLSTMELSGTVVQKGYLKSQGHKRNKWKVRRFVLRKDPALFHYDPSKEENRPPVGGFSLRGLSV                                          |
| Mouse    | PKHA1_MOUSE         | PLEKHA1-PH1    | T | MTDIVGGVPIIPTQKEEVNECGESLDRNNLKRQSHLPHYAPKPPSDSAVIAKAGYCVKQGAVMKNWKRRYQLDENTIGYFKLEKEPLR                                             |
| Mouse    | PKHA2_MOUSE         | PLEKHA2-PH2    | T | SONGGDQGECEPGTHAFLRRSQSYIPTSGCRPSTGPPLIKSGYCVKQGNVRKSWKRRFFALDDFTICYFKCEQDRRETRIPKLDVLTHE                                            |
| Mouse    | PLEK_MOUSE          | PLEK-PH1       | T | MEPKRIREGYLVKKGSVFNWTKPMWVLLLEDGIEFYKKSNDNSPKGMPLKLGSTLTPCQDFGKRMFLVKTITTKQQDHFQAALFEERDAV                                           |
| Mouse    | CYH1_MOUSE          | PSCD1-PH1      | T | VERFIAMNRGINDGGDLPEELLRLNYESIKNEPFKIPEDDGNLTHFFNPDREGWLLKGGGRVKTWKRWFILTDNCLYYFEYTTDKPEPR                                            |
| Mouse    | CYH2_MOUSE          | PSCD2-PH1      | T | KIPEDDGNLTHFFNPDREGWLLKGGGRVKTWKRWFILTDNCLYYFEYTTDKPEPRGIPLNLSIREVDDPRKPNCFELYPNNKGLLIKA                                             |
| Mouse    | CYH3_MOUSE          | PSCD3-PH1      | T | KIPEDDGNLTHFFNPDREGWLLKGGGRVKTWKRWFILTDNCLYYFEYTTDKPEPRGIPLNLSIREVDDPRKPNCFELYNPSHKQVVIKA                                            |
| Mouse    | RASA2_MOUSE         | RASA2-PH1      | T | GCQSRKKSFRKKSVMCFELKMFQEERYFTDVKFLDEISSTETKESGTSPEVHLKEGEMYKRAQGRTRIGKKNFKKRWFCLTSRELTYHR                                            |
| Mouse    | RASA3_MOUSE         | RASA3-PH1      | T | SKKSASFKESYMATFEYEFFNEQYADAVKNFLDLISSGRRDPKSIEQPILLKEGFMIKRAQGRKRFGMKNFKRWFRLTNHEFTYQKSGI                                            |
| Mouse    | 3BP2_MOUSE          | SH3BP2-PH1     | T | MAAEEMQWPVPMKAIGAQNLLTMPGGVAKAGYLHKKGQYDQLQLLWPLRFVHHRKIYFYKSSSTASPPQGFSLSGYNRMRAAEEITSN                                             |
| Mouse    | TEC_MOUSE           | TEC-PH1        | T | MNFNTILEELIKRSQQKKTSPNLNYKERLFLVTKSVLSYEGRAEKYRKGVIDISKIKCVIENKDDGVIPQCNKFPFQVVDANTLYIFAPSP                                          |
| Mouse    | PHLPP_MOUSE         | PHLPP-PH1      | T | KPHSTGSSERIQLSGMYNVRKGMQLPVNRWTRRQVILCGTCLIVSSVKDSVSGMKMHLVPLIGGKVEEVKHKHQCLAFSSSGPQSQTYICF                                          |
| Human    | ARHGAP25-PH1H       | ARHGAP25-PH1H  | C | mslklprnwdfnkveaakiarsrvmtgeqmaafhpsstpnlerpikmgwlkqrsivknwqgrfvlraqglyykd eedtkpqcmylpgctikeiatnpeeagkfveipaswdqnrnc                |
| Human    | NM_001040118.1      | CENTD2-PH1H    | C | TCFEVNEREEAERPLHFAEKVLPLHGLGTDSHLVVKKHQAMEAMLLYLASRVGDTKHGMMKFREDRSLGLGLPSGGFH DRYFILNSSCI                                           |
| Human    | NM_080612.2         | GAB3-PH1H      | T | MAGDAVCTGWLKSPERKLQRYAWRKRWFVLRGRMSGNPDVEYYRNKHSKPIRVIDLSECAVWKHVGPSFVRKEF QNNFVFIK                                                  |
| Human    | XM_928224.2         | LOC653583-PH1H | T | SSGPVPAITAPPTPPHPPGPRILDLRQHLEGWGNHPENCIPHVCQVSGCCCRGPLVKMGGRKIKTRKRWFCDRQARRLAYADKEETCR                                             |
| Human    | NM_145739.1         | OSBPL6-PH1H    | T | MSSDEKGISPAAKTSPTPHRSASSSTSSQRDSRQSIHILERTASSSTEPSVSRQLLEPEPVPLSKEADSWEEIIEGLKIGQ TNVQPKDKHEGFI                                      |
| Human    | NM_145753.1         | PHLDB2-PH1H    | T | EKEVKIRERQRAQARPLTRYLPVRKEDFDLRSHVETAGHNIDTCYHSVITEKTCRGLIKMGGKIKTWKRWVFDNRKR TFSYADKHETI                                            |
| Human    | NM_013385.2         | PSCD4-PH1H     | T | PFERFVSMNRGINNGSDLPEDQLRNLFDSIKSEPFIPEDDGNLTHFFNPDREGWLLKGGGRVKTWKRWFILTDNCLYYFEYTTDKPE                                              |
| Human    | NM_022047.2         | DEF6-PH1H      | C | QVAQTTGGLSVWQFLELFNSGRCLRGVGRDLSMAIHEVYQELIQDVLKQGYLWKRGHRRNWAERWFLQPSCLCYFGS EEECKEKG                                               |
| Human    | NM_002972           | SBF1-PH1H      | T | MRQAARRSTSTLYSQFTAENSENRSYEGTLKYGAFMKPWKARWALDKTKHQLRYYDHRVDTECKGVIDLAEVEAVAPGPTMGAPKT                                               |
| Human    | NM_030962           | SBF2-PH1H      | C | MNLPYQKRSLHLHPDSSMGEEQNSSISPSNNGVERRAATLYSQYTSKNDENRSFEGTLYKRGAALLKQWKRWFVLDVTKHQLRYDSDGED                                           |
| Human    | NM_020715           | PLEKHH1-PH1    | C | MRGVSMSSLSSEGDYAIPPDACSLDSYSEPEHLKQRTSSYSTDGLGLGGESLEKSGYLLKMGSQVKTWKRWFVLRQGMYYKSPSDV                                               |
| Dros     | dCG12467-PH1        | dCG12467-PH1   | C | MLSFESGLSDDYALPPDAVSESTCMDASMPDLLMRQSYVDSPSKKIESLEKMGHLAKLGGKLTWRKRWFVLRKNGSLNYW QSHQHDVQRI                                          |
| Dros     | CG5004-PH1-DR       | CG5004-PH1-DR  | C | SDRKRVLPHKQRPLTRYLPFSPDLNLRHHIETAGHQIDLPCPHVFDVAHNSKRCRGLHKL GATFHAWSRWFVLDROQSALIDYSDKSERKPR                                        |
| Dros     | vap-PH1-DR          | vap-PH1-DR     | C | NHPVNVGQPEFNQYVVEKAAEKIYATLRECRDQIQLDKKIKGKHHGHLNKSDDKTKWKQLYFALINDGSETQLCFYD NPKTKPKGLIDL                                           |
| Dros     | Akt1-PH1-DR         | Akt1-PH1-DR    | T | SAEKFSWQSQWPSRTSAAPTHDSGTSMSINTTDLSSPSVTSGHALTEQTQVVKEGWLMKRGEHIKNWRQRYFVLHSDGRL MGYSRSPA                                            |
| Dros     | CG14366-PH1-DR      | CG14366-PH1-DR | T | PKATPSSSESSNSTKSPSHAPLDRKKSAGSIQALKSPITKPPSTPVTL SGWLHKQGSDDLKVVWRKWFVLAEYCLYY KFGPEEKLGS                                            |
| Dros     | Grp1-PH1-DR         | Grp1-PH1-DR    | T | KIPQDDGNLMDLHFFNPDKEGWLWKGGRYKSWKRRWFILNDNCLYYFEYTTDKPEPRGIPLNLSIREVDDPRKPNCFELFATGDEADIIKA                                          |
| Dros     | dBTK29A-PH1B(1-223) | dBTK29A-PH1-DR | T | <b>MMGTKHRNSHVNGSIKSSSLRSSKSFQAKMDLMSERLYDVVKS GSMVKRAQNKKRFTPVNYKHRWFELTKRTFSYFDVENVERREF</b>                                       |
| Dicty    | CRAC-PH-DICTY       | CRAC-PH-DICTY  | T | mgkterkkellefeyekigdvssyimkagngkgfldryfalhmlyilkygkkslkdqkqpgyinlmdcnp ddtkeiaplmfjshkhrtyvkvadessmkqflliarislekiddkl                |
| Dicty    | AKT-PH-DICTY        | AKT-PH-DICTY   | T | mstapikhegfitkeggfkswkkrwfilkgdlsyktqgelvplgvihlntsgnhiknsdrkrvngfevqtpsrtyfl cseteeraakwiiellnerellnggkqpkkevqvadeflnlvkgsfgk       |
| Dicty    | PHDA-PH-DICTY       | PHDA-PH-DICTY  | T | mrlerdeallqalnyksikdkviystvmkagngkqgflrfvlykqfviyktklltspekpggyidredcpkskv tilddtmfivhragrtfllikeepkprfrfeickcvalklqtftltpvekqtlilnc |
| Celegans | F59A6.5-PH1-CE      | F59A6.5-PH1-CE | C | shcdvhvhascaprvnntcgmplqcatyrenhttvssgsvsegrmngwlvrvyrdmtdgstwaswammdlstrisfynd gadlekpfidlnkeqvwrtgqempvdcddsmrannvmlit             |
| Celegans | let-502-PH1-CE      | let-502-PH1-CE | C | DMQTTQDARDELKECKEELANRNVNTRYEDKRSLDSREGIPSSLSNQHIQMEGWLSLRDNTKKSRRPKWTNCFVALNEY SFTIYVDEKA                                           |
| Celegans | obr-1-PH1-CE        | obr-1-PH1-CE   | C | MPSLSEFLRKRARRQRRLQAVPSNNKKSNNNNNIMSSTSSGSRRAASLSSINNFHELASVEKAGWLNKWTNLYKGYRQR WFLVDSNAT                                            |
| Celegans | sec7-PH1-CE         | sec7-PH1-CE    | C | KIPDEVSTSGKGTVDNLLHAEREGLFKQSSNPLFSGALSWKRWVFLSENCLYYFDQMTDKPEKGIITLANVGIRKVE APSRFDMEIFEIS                                          |
| Celegans | akt-1-PH1-CE        | akt-1-PH1-CE   | T | MSMTSLSTKSRQVEDVIEGWLHKKGEHIRNWRPRYFMFNDGALLGFRAKPKRGGQFPPEPLNDFMIKDAATMLFEKPRPE NMFVWRCLQ                                           |
| Celegans | akt-2-PH1-CE        | akt-2-PH1-CE   | T | MSTENAHLOKEDIIVIESWLHKKGEHIRNWRPRYFILFRDGTLLGFRSKPKEDQPLPEPLNMFIRDAATVCLDKPRPNMF IVRCLQWTTVIE                                        |

ELEDMMKISALKSEIQKEKANKGQSRAIERLKKKMFENEFLLLNSPTIPFRIHNRNGKSYLFLSSDYERSEWREAIQKQKQDLQAFVLSVLELQVLTGSCFKLRTVHNIPVTSNKDDDESPGLYGF\*  
(KLVREVAHEEKGLFLISMGVKDPPEMVEVHASSREERNSWIQIIDTINSLNRDEDEGIPSE\*  
'IQFENVNIYYGIQCKMKYKAPTDFHCFVLKHPQIQKESQYIKYLCCDDARTLSQVWVMGIRIAYGKTLVDNYQRAVARAGLASRWTLGTVGTPMPAQPSTVPSGLKTGTSQPN\*  
NMIPFEHRSGGKLDGGEAFFLKECTKRHMDSDRRFCDIEAADRPGVPLTVQAFSEEEKQWLEALGGKEALFHTFNRAIVPRPEGGAQLDKMGF\*  
-TSLDKPSVSVLQNLVIRDIANQAKGMFLISSGPPPEMYEVHAASRDDRTTWIRVIQSSVRL\*\*  
.GGSLRGAFSNNERNVFNFRVFSFKNGSQSQTSHSLQANDTFNKQQWLNCRQAKETVLSAAGQAGLLDSEGLVQGGPTENREPQGETKLEQMDQSDSESDCSMDTSE\*  
AFEISGSMIERILVSCSTSQDDLHEWVEHLQKQTKVTSVSNPTIKPHSVPSHTLPSHPLTPSSKHADSKPVALTPAYHTLPHPSH\*  
'EKKAEQQLQLDGYTVDYTDQPGLEGGRAFFNAVKEGDTVIFASDDEQDRILVWQAMYRATGQSHKVPPTQVQKLNAGGNNVQQLDAPISQFYADRAQKHGMDEFISSNPC\*  
'LRLCSVKPCEDIERRFCFEVVSPTKSCMLQADSEKLRQAWVQAVQASIASAYRESPDSCYSERLDRASPSTSSIDSTTDSRERGVKG\*  
'NDKSTTPNGTININEVICLAIHKEDFYLNTGPFIFFIYLPSEVFLFGAETSQAQRKWTEAIAKHFPVPLFAENLTEADYDLIGQLFYKDCHALDQWRKGFAMDKSSLHFCLQTQE\*  
PLRAMKFYLVGKKMKPPT\*  
'NERAVTPNREIRASEIVCLAVPPPDTGHFEHTFEVYTEGERLYLFGLESAEQAHEWVKCIAKAFVPLAEDLLARDFERLGRPLPYKAGLSLQRAREGWFLRGESELRAVFEPEG\*  
'/HETEKHEKQWYLCDDTQMELEWFAFTLSVQHDGLVWPSEPSRVSRVPEVRMGVSLIPLRGSSENMRRSVAFTAADPLS\*  
'VSIHGAVGASELANTAKADVPIYKLMESHPTTCWPGRTLYLLAPSFPDKQRWVTALESVAGGRVSRKAEADAKLLGNLLEGGDDR\*  
NDSVWYLRAQDPEHRQQWVDAIEQHKTESGYSSESLRRHGSMSVLSVGSAGYSATSTSSFKKGHSLREKLAEMETFRDI\*  
QLELACETQEEVDSWKASFLRAGVYPERVGDKEKASETEENGSDSFMHSMDP\*  
'JLKIRDVEKGFMSNKHVFAFNTEQRNVYKDLRQIELACDSQEDVDSWKASFLRAGVYPEKQDAENEDGAQENTFSMDPQLERQVETIRNLVDSYVAIINKSIRD\*  
'3MTIEESEEEVWVPHCLTLRGQRQSIIVAASSRSEMEEKWMDIQMAIDLAEKSNGPTPELLASSPPDNKSPDEATAADQESDDLSASRTSLERQAP\*  
'SHQDSSHPLASPLLLGYSLTIPSESENIHKDYVFKLHFKSHVYFFRAEYTFERWMEVIRSATSSASRAHILSHKESHLY\*  
'PRTFLVSGKQRSLELQARTEEEKDWVQAINSTLLKHEQTLFLLNSTNRDDEDTPPNSPNVDLGKRA\*  
LVSGKQRSLELQARTEEEKDWVQAINSTLLKHEQTLFLLNSTNRDDEDTPPNSPNVDLGKRA\*  
RPDRRHVFKITQSHLSWYFSPTEELQRRWMAVLGRAGRGDTFCPGPTLSEDKEMEETPVAASGATAEPPEASQTRDKT\*  
'QVRTRIDVAGMKVRELDAEFPHSFLVSGKQRTLELQARSDEMVSWMQACQAAIDQVEKRSETFKAAVQGPQGDQEPKQVEELGLRAPQWRDKMVTMCMRCQEP\*  
LMGQKLSVREKMDISDLQVQDIVKPNAACTFIITGRKRSLELQTRTEEEKKEWIIQIATVEKHKQKSETFRAFGGACSQDEEPTLSPDQPVMSTSS\*  
'NELKIESVERSILSASSAERDDWLEAISSIEEYAKKRITFCPSRSLDEDSERKEEVSPGLGAKA\*  
ILQLLADLEESSIFYLIAGKKQYNAPNEHGMCIKPNKAKTEMKELRLLCAEDEQIRTCWMTAFRLLKYGMLLYQNYRIPQRKGLPPFPNAPMRSVSENLSVAMDFSGQIGRVIDNPAAEQS\*  
'STSHVYMSLAGKKKHGAPTPYGFCLKPNKAGGRDLKMLCAEEQSRTCWVTAIRLLKDGMLYQNYMHPYQGRSACNSQMSMSPMRSVSENLSVAMDFSGEKSVIDNPTEALSVAVEE\*  
RHLQYVADVNESVYVVTQGRKLYGMPTDFGFCVKNLNRNGHKLHIFCSEDEQSRCTWLAFAFLFKYGVQLYKNYQQAQSRHLRLSYLGSPPLRVSDNTLVAMDFSGHAGRVIDN\*  
MYKTIPLNEVLVCLPTDPSGDEPIFHSHIDRVYTLRAESINERTAWVQKIKAASELYIETEKKKREKAYLVRSQRATGIGR\*  
'MYKTIPLNEVLVCLPTDPSGDEPIFHSHIDRVYTLRDNINERTAWVQKIKGASEQYIDTEKKKREKAYQARSQKTSIGIR\*  
'3GRTSPSSDNKTVLKASNIETKQEWIKNIREVIQERIIHLKGALKKEPIQLPKTPAKLRNNSKRDGVEDGDSQGDGSSQPDITIS  
'/LNLSTAQVEYSEDQQAMLKTPNTFAVCTEHRGILLQANSDKMDHDLWLYAFNPLLAGTIRSKLSRRRSQAMRV\*  
GINLSTAQVEYSEDQQAAMVKTPTNTFAVCTKHRGVLLQALNDKMDNDWLYAFNPLLAGTIRSKLSRRRCPSPQPKY\*  
TENVKDGTKKFEIWAYNAREEYIIQAPTPEIKAAWVNEIRKVLTSLQACREASQHRALEQSHSLPLPTSPSTSPKGNTRNVKLED\*  
EINLSTCYDVTVEYVQRNYGFQIHTKEGEFTLSAMTSGIRRNWIQTIMKHVLPASAPDVTSSLPEGKKNKSTSFETCSRSTEKQEAEPGEPDPEQKKSRRAR\*  
KETGYWNVTVYGRKHCRYLTKLLNEATRWSIAIQNVDTDKAPIDTPTQQLIQDIKENCLNSDVVEQIYKRNPIRYTHHPLHSPLLPLPYGDINLNL\*  
'3GSFRGAFGNSDKAKNIFRVRFQDPSPGHSHLQANDVFHKQWFCNIRAAIAPFQRAASPLELQGLPDLHEECEENNPAGNLRQRRSCVVPVGMVIDEE\*  
'\_FLFNDLLVICRQIPGDYQVDSAPRGLLRVEELEDQGTLANVILRLEENADDREATYMLKASSQSEMKRWMTSLAPNRRTKFSVTSRLLDCPQVQCVHPYVAQPDELLELADILNILEKTEDGWIFGERLHDQERGWFPSS\*  
'MEQKPGAKQGPVDTLKYCVRRKTESIDKRFCDIETNERPGTITLQAPSEANRRLWMEAMDGKEPIYHTPITKQEEEMELNEVGF\*  
'KRATKQFSALTDPSVIMADSLKIRGTLKWSWTKLWCVLKPGLVLLIYKTPKVGQWVGTLLHCCELIERPSKKDGFCKLPHPLDQSVWAVKGPKGESVGSITQPLPSSYLIFRAASESDGRCWLDALALRCSSLLRLSTCKQGRDGE\*  
'-TVVFHGRPNLDLVANSVEEAQIWMRGLQLLVDLVASMDHQEQMDQ\*  
'\_LYMKPDSGAIQVLLVDEKFRVVKGRKETETKYGLRIDNLSRTLILKCNYSYRHHARWWWGGAIEEFIRKHGADFLKDRHFGSYAALHENTLAKWYVNAKGYFEDIANAMEEASEEIFITD\*  
'TSHRSLILKCSSYRQARWWWQEIETELAQSGRDFLQLHQHDSYAPPRPGTLRAIFWNGAGYFAAVADAILRAQEIEFITDWWLSPEI\*  
'JANDQKDLKDWVEALNQASKITVPKAGTVPLATEVLKNLTPAPTTLEKKPQVAYKTEIIGGVVVQPTI\*  
SKACLTDRTAKEKEISETSESLKTKMSELRLYCDLLMQQVHTIQEFVHR\*  
DTGKEMELWMKAMLDAAALVQTEPVKRITFNFRVDKITTDSASTKETNNIPNHRVLRPEVQNHQKNKEISKIE\*  
STDDCLAWKFTLQDSRTNTAYVGSAILSEETAASAASPPYAAAYATPTPEVYGYGYPYSGAYPAGTQVVY\*  
QMNLRGCEVTPDVIISGQKFNILLIPVAEGMNEIWLRCNEKQYAHWMAACRLASKGKTMADSSYNLEVQNILSFLKMQHLNPDQLIPEQITTDITPECLVSPR\*  
SQEQCDWMEALQRASYEYMRQSLIFYRNEIRKMTGKDPLEQFGISEEARFQLNPKDGRITTCIGSQLNVL\*  
'3RVREALQKVRPQDEWVNIQYPDQAEAPEAPPDLSPPYSTLLPEPAGAQGMQLDW\*  
'/PILLSVNMGGEQCGCRRSNTDRPHAFQVILADRPCLLECSADSEAEMADWMMQHLQCAVSKGVPQGIAPSPICCLVITEDRLFTCHEDCGTSFFRSLGTARLADIT\*  
'JHSKFTLARCQRPGTAPNLIFLAVSPEEKESWINALSSAITRAKNRILDEVTEEDSYLAHPTDRAKIQHSRRPPTRGHLMMAVASTSTS\*  
'JLFEITADEVHYLQAATSKERTEWIKAIQVASRTGK\*



.TSERTFYLVAETEADMNKNVWQSIQCIGFNQAEESTDSLRLNLSSASHGPRSSPAEFSSSQHLLRERKSSAPSHSSQPTL\*  
CESRQRWWLTLKEETRNNNSLVSKYHPNFWMGDGRWRCCSQLEKPAVGCAPYDPS\*  
SVLSQVHSSTDQEIEMHDEQANPQNAVGLTDLVGLIDSVCASDSDPRPNSFVIITANRVLHCA\*  
:REKLHGCIQDVLGSLVMSVKKSKCIDLDEEHIYHLKVKSEELFDEWVSKLRHHRMYRQNEIAMFPRDYNHFFSGSSVTDSAPGVFESVSSRKRSSLSKQNSFPFGNSLSF\*  
VHGSIDVRLSVMSINKKAQRIDLDEEDNIYHLKIKSQDLFHSWVAQLRAHRLAQRLDMPASATHRKAPGTQMLTAGSASTLPGVGPREKVVSWLRDS\*  
:IPWSQELRPEAKNFKTFVHTPNRTYYLMDPSGNAHKWCRKIQEVWRQYQSNPDAAVQ\*  
GVIFYQAIIEVYDHLRSAAKSPNPAALTFCKVTHDRLYYVMPAPSAEAMRIWMDVIVTGAEGYTFQMN\*  
SWAFEITGAIHAGQPGKIQQLHILKNSFKLPPHISLHRIVDKMHD\*  
SALEDNGVPTGVKGNVQGNLFKVIKDDTHYYIQASSKAERAEWIEAIKLT\*  
VIPLKEVHKVQECKQSDIMMRDNLFEIVTTSRTFYVQADSPEEMHWSWIKAVSGAIVAQRGPRSSSSMRQARRLSNPCIQRSIPAGLQN\*  
ECLVKSGDLLMRDNLFEIITTSRTFYVQADSPEDMHSWIEGIGAAVQALKCHPREPSFSRSISLTRPGSSTLTSAPNSILSRRRPPAEERGLCKAPS\*  
VWRDIKKAIKCIEGGQKFAKSTRRSIRLPETIDLALYLSMKD\*  
3TIPLNLSIREVEDSKPNCFELYIPDDKQVQKACKTEADGRVVEGNHTVYRISAPTEEKEDWIKCAKAAISGDPFYEMLAARKKVVSSTKRH\*  
.CKTEADGRVVEGNHMYRISAPTEEKEDWIKSQAASVDPFYEMLAARKKRISVKKKQEQP\*  
CKTEADGRVVEGNHMYRISAPSPPEEKEEWMKSIAKASIRDPFYDMLATRRRIANCK\*  
QQGKDAIYTIPIVKNILAVEKLEEGSFNKNMFQVIHTEKTLIYQANNCVEANEWIDVLCRVSRCHNRLSSFHPSAYLNGNWLCQETSESTPGCKPCTAGIPADIQIDDEDRETER\*  
DQPLCNIPENILAVERLEESFRMKNMFQVIQPERALYIQANNCVEAKDWIDILTKVSCQNKRLTVFHPASAYLNGHWLCCRASDTAAGCTPCTGG\*  
NVFFPKIHHISKKHRTWFFSASSEDERKSWMALLRREIGHFHEKKEPLDTSDDSSDTSFYGAVERPIDISLSSYPMDNEDYEHEDE\*  
QSRDRWVKLKEEIKNNNIMIKYHPKFWADGSYQCCRQTEKLAPGCEKYNLFESSIRKTLPPA\*  
-DTFTEYLRLWRQVSKVASQRISVDLSCCSLEHLPANLFYSQDLTHLNLKQNFRLRQTPTLPAARGL\*  
jqdsyvmassqaemeewkflrrvagtpcgvfgqrldetvayeqkfgphlpil  
\_RLYKEVRSQRPWVSGAPETSHRPEKEWPIKSLKVYLGVKKLRPPCTCWGFTVWHETEKHEKQWVYLCDDTQEMELREWFAFLFVQHDGLVWPSEPSRVSRVAVPEVRLGVSULIPLRGSENMRRSVAATADPLSLLRNV  
(TTSRTFYLVAKTEQEQMWWHSISQVNCNLGHLEDGADSMESLSTYTPSSLSASSLLTAHAASSLSRPRDDPNTNAVATEETRESESELLFLPDYLV  
\_KGVIFYQAIIEVYDHLRCAFKSPNPRLTFCVKTYERLFYVMPAPSAEAMRIWMDVIVTAADENHAP  
MLKKRWVPLKGWHRFFVLDNGMLKYSKAPLDIQKGVHGSIDVGLSVMSIKKARRIDLDEEHIYHLKVKSQDWFDAWVSKLRHRLYRQNEIVRSPRDASFHIFPSTSTAESSPAANVSVMGDKMQPNSFPWQSPKPCNSLPLAT  
KLGVIYFQAIIEVYDHLKANKSPNPLTFSVKTHDRYIYVMPAPSAEAMRIWMDVIVTGAEGYTHFL  
RGIIPLENLSVQKVDPPKPFCELYNPSCRGQKIKACKTDGDRVVEGKHESYRISATSAAERDQWIE SIRASITRVFPYDYLSTRKKKIASKQ  
:IIPLDHCCVEVLPDRDGRKCMFCVKTANRTYEMSASDTRQRQEWTAAIQMAIRLQAEKGTSLHKDLKQKRR EQREQRERRRAAKEEELLRLQ  
'DEKAFFDVKTRRYYNFCQAQDVPQAQWVDRIQSCLSDA  
TSCKGHIDLAEVEMVIPAGPSMGAPKHTSDKAFFDLKTSKRYYNFCQAQDQSSAQWMDKIQSCISDA  
'IRKPQGGVDLNSRCQIVREGGSQTFQLISEKTYLADSPSLLEEWRVLSLLKQVATGPPALLRGGTK  
KPQGGIQLDEVCRINRAEGASTFEIDTGKVVYLTADSHATMDDWIRVLQNVQRRNATKLLSRDDQ.  
'GGAYFATIDEVYLDHLNASKSGRPHCTFIVKTKKRSYNLQAASDSAARIWIDAITGAQGNLDY  
'SCAYLYQCHDSLWERPYCFQIVERALPCLATVTYLCAPSQESYVEWINSKKAQCDSQLSRAQKVVSRRLREL  
'DSASTPSDFLLNFTVRCQIMTVDRPKPFTIIRGLQWTTVIERTFAVESELERQWTEAIRNVSSRLIDVGEVAMTPSEQTDMTDVDMATIAEDELSEQFSVQGTTCNSSGVK  
SVLLPSYRVSACLPEDKIYRKFAFKCEHQNMRTYWLADNSEAMMQWVRALAAASLMQAPSSGESEPSVNSSLNHSGENSDSGIHTLQSHPGKQPTPSSSENT  
ICKTDSEGVVEGKHTVYRMSAAATEEQEWIKRLTQSIHNPFFYDILVQRKKKALS  
**IGRIHLKGVRLVEEATVSGEGGDPFAPDGYPFQVGYCEISASANSHQLENGGGSGVIEGQQSRAVPPQYTYLVIANSEKERSEWIRAIRQVCEDSNTPKSYRHPGLWWSGKKWSCCKGLSRTTFGCRAAAHW**  
gctvvtlkkkfvitnplipdrvs:pemaeeewkqmknyasfnl  
viqvrkdtgevyamkvlskhhivehn:evhtlsernilqkinhpl  
jildcnmskedfkhnielf:kdgvfnvniisqerteevk  
mrrrcylilapsqpsarrwaecqtaqrkrmmnlnske:ssiaeftclvlnspnnlkifkaytiedw  
VSVILLIEAGAMAHVRHVTAADLRNVDDSQLPKIFHIMYDDASCNSSRHASNSDLSMIESFREESWKRHD:QFELSYHIRTFCVDCNKKLSDII  
LSYYRNPSEVGHTCRGSINLQEARVHTDKTTCSCIVSGQSQTFHVKPQNEMDRQWWTNSLEYMRHKAITRA:EESEDEDAQMAKTDSNRSDALILANRQMSGKLCDLRTAANMMNKQG  
LSDGQIKACKTEQDGRVLEGRHSIYKICAVNDEDMRSWINAISRMMAQQLHLLARPKSTH  
ATTVIERTFYAESAEVRRQWIIHAIESISKYKGTNANPQEELMETNQPKIDEDSEFAGAAHAIMGQPSSG:HGDNCS  
RTFYADSADFRQMWIEAIQAVSSHNRLKENAGNTSMQEEEDTNGNPSGESDVNMDATSTRSDNDFESTV:MNI



|  |
|--|
|  |
|  |

|

:TTGQSKVAAWLQD

|                       |               |   |                                |
|-----------------------|---------------|---|--------------------------------|
| CYH1_MOUSE            | PSCD1-PH1     | T | VERFIAMNRRGINDGGDLPEELLRNLYESI |
| NM_013385.2           | PSCD4-PH1     | T | PFERFVSMNRGINNGSDLPEDQLRNLF    |
| <b>XM_928224.2</b>    | LOC653583-PH1 | T | SSGPAVPAITAPPTPPHPPGPRILDLRQF  |
| <b>NM_145753.1</b>    | PHLDB2-PH1    | T | EKEVKIRERQRAQARPLTRYLPVRKEDF   |
| <b>NM_145739.1</b>    | OSBPL6-PH1    | T | MSSDEKGISPAHKTSTPTHRASASSSTSS  |
| <b>NM_080612.2</b>    | GAB3-PH1      | C | MSAGDAVCTGWLVKSPPERKLQRYAWF    |
| <b>NM_002890.1</b>    | RASA1-PH1     | C | ICPTPNNQFMMGGRYYNSIGDIIDHYRKE  |
| <b>NM_002972.1</b>    | SBF1-PH1      | C | STAPHHRRSLGVYLQEGPVGSTLSLSD    |
| <b>NM_022047.2</b>    | DEF6-PH1      | C | QVAQTTGGLSVWQFLELFNSGRCLRGV    |
| <b>NM_001040118.1</b> | CENTD2-PH1    | C | TCFEVNEREEAERPLHFAEKVLPILHGLC  |
| <b>NM_133268.1</b>    | OSBPL1A-PH1   | C | HKQCALKLLRSGADPNLKNKNDQKPLDI   |
| NM_020715.2           | PLEKHH1-PH1   | C | YAIPPDACSLDSDYSEPEHKLQRTSSYS   |

KNEPFKIPEDDGNDLTHFFNPDREGWLLKLGGRVKTWKRRWFILTDNCLYFFEYTTDKEPRGTIPLE  
)SIKSEPFSSIPEDDGNDLTHFFNPDREGWLLKLGGRVKTWKRRWFILTDNCL□YFFEYTTDKEPRGIPI  
!LEGWGHNPENCPHVQVSGCCCRGPLVKMGRIKTWRKRWFVCFDRQARRLAY□YADKEETKLKGVY  
DLRSHVETAGHNIDTCYHVSITEKTCRGFLIKMGGKIKTWKKRWFVFDNRKR□TFSYYADKHETKLKGV  
QRDSRQSIHILERTASSSTEPSVSRQLEPEPVPLSKEADSWEIIEGLKIGQ□TNVQKPKHEGFMLKKF  
RKRWFVLRGRMSGNPVLEYYRNKHSSKPIRVIDLSECAVWKHVGPSFVRKEF□QNNFVFIVKTTSR`  
EQIVEGYLLKEPVPMQDQEQVLNDTVDGKEIYNTIRRKTKDAFYKNIVKKGY□LLKKGKGRWKNLYFIL  
)SDQSSGSTTSGSRQAARRSTSTLYSQFTAENSENRSYEGTYKKGAFMKPWK□ARWFVLDKTKHQLI  
'GRDTLSMAIHEVYQELIQDVLKQGYLWKRGLRRNWAERWFQLQPSCLCYFGS□EECKEKRGIPLDA  
3TDSLVLVKKHQAMEAMLLYLASRVGDTKHGMMKFRDRSLLGLGLPSGGFH□DRYFILNSSCLRLYKI  
\_AQQGAEMKHILVGNKVYKALKRYEGLWKSSRFFGWRLFVWVLEHGVLSWYR□KQPDVHNIYRQGC  
TDGLGLGGESLEKSGYLLKMGSQVKTWKRRWFVLRQGGQIMYYKSPSDVIRKP□QGQVDLNSRCQIVR

ENLSIREVEDSKKPNCFELYIPDDKDQVIKACKTEADGRVVEGNHTVYRISAPTPEEKEDWIKCIKAAISGI  
\_ENLSVQKVDDPKKPFCELYNPSCRGQKIKACKTDGDGRVVEGKHESYRISATSAEERDQWIE□SIRA  
/FQAIEEVYYDHLRCAFKSPNRLTFCVKTYERLFYMVAPSPEAMRIWMDVIVTAADENHAP  
'IYFQAIEEVYYDHLKNANKSPNPLLTFSVKTHDRIYVMVAPSPEAMRIWMDVIVTGAEGYTHFL□L  
ꜱKWPLKGWHKRFFVLDNGMLKYSKAPLDIQKGKVVHGSIDVGLSVMSIKKKARRIDLDTTEHHYH□LKVKS  
TFYLVAKTEQEMQVWVHSISQVCNLGHLEDGADSMESLSYTPSSLQPSSASSLLTAHAASSSLPRDD□I  
EGSDAQLIYFESEKRATKPKGLIDLSCSVYVHDSLFGRPNCFQIVVQHFSEEHYIFYFAGE□TPEQAE  
RYYDHRVDTECKGVIDLAEVEAVAPGTPTMGAPKTVDEKAFFDVKTTRRVYNFCAQDVPSAQQWVDR  
\HCCVEVLPDRDGKRCMFCVKTANRTYEMSASDTRQRQEWTAAIQMAIRLQAEGKTSLHKDLKQKRR  
EVRSQRPWSGAPETSHRPEKEWPIKSLKVYLGVKKKLRPPTCWGFTVVHETEKHEKQQWYLCCDT□G  
CKHLTQAVCT  
GEGSQTFQLISEKTTYLTADSPSLLEEWIRVLQSLLKVQATGPPALLRGGTKPTVKGWLTKVKHG□HS

DPFYEMLAARKKKVSSTKRH\*  
SITRVPFYDLVSTRKKKIASKQ

;QDWFDAWVSKLRHHRLYRQNEIVRSPRDASFHIFPSTSTAESSPAANVSVMDGKMQPNSFPWQSPLF  
PNTNAVATEETRSESELLFLPDYLV

DWMKGLQAFCNLRKSSPGTSNKRLRQVSSLVLHIEEAHKLPVKHFTNPYCNILNSVQVAKTHA

□IQSCLSDA

□EQREQRERRRAAKEEELLRLQ

∫MELREWFATFLFVQHDGLVWPSEPSRVSRVPEVRLGSVSLIPLRGSENMRRSVAFTAADPLSLLRN

;KVVWCALVGKIFYYYRSHEDKRPLGCLPVRDAHIEEV

³CSNSLPAT□CTTGQSKVAAWLQD

∩V



|                              |   |            |          |          |    |           |
|------------------------------|---|------------|----------|----------|----|-----------|
| Cerevisiae SLM2-PH1 NP_01435 | C | 448..553   | 20.63529 | 8.396013 | 9  | EVKSGFLF  |
| Cerevisiae BOI1-PH1 NP_00946 | C | 779..893   | 16.96294 | 8.511027 | 9  | ADCSGWM   |
| Cerevisiae BUD4-PH1 NP_01262 | C | 1306..1412 | 0.692037 | -2.74539 | 7  | IYKEGYLL  |
| Cerevisiae ATG26-PH NP_01329 | C | 241..333   | 0.510442 | -5.36333 | 4  | VKMSGNL   |
| Pombe reserved_r NP_59415    | C | 722..835   | 6.859368 | 5.492493 | 4  | AQKEGVLI  |
| Pombe SPAC26A3 CAA93232      | C | 722..835   | 6.859368 | 5.492493 | 4  | AQKEGVLI  |
| Pombe csx2-PH1 NP_59589      | C | 513..612   | 5.550006 | 0.909318 | 5  | SAKQGLLI  |
| Pombe SPAPYUG NP_59470       | C | 584..684   | 5.464721 | 5.732295 | 6  | LLCDGYLC  |
| Pombe ksg1-PH1 NP_58844      | C | <495..570  | 3.883014 | 1.060725 | 10 | ISKIGTLN  |
| Pombe SPAC11E3 NP_59493      | C | 683..806   | -0.83699 | -9.89105 | 8  | YIKQGILKI |
| Pombe SPCPB16/ NP_58802      | C | 225..317   | -7.08751 | -2.91975 | 6  | VLMQGTIF  |

EKRS.....kFLKSYSRGFYVLT.....SFLHEFKTPD..khkfSTPLMSIPLVEC..TVTEHSKK.....tks  
MSKKG....tgAMGTWKQRFFTLHG.....TRLSYFTNTN.....dEKERGLIDITAH..RVLPASDD.....drlis  
QDG....gdLKGKIENRFFKLHG.....SQLSGYHEI-.....-SRKAKIDINLL..KVTKVLRN.....ediqadnggqrn  
NIRT.....KLIRSTRYWCVLKN.....HLFSMYTSST....eYFPVLTIDLREV.qKIETQKHT.....Inç  
LKYI.....ENSGLVSRYFYLD.....NILYFAENRN.....SPVLGTIHLKDA..QVNRYNAN.....lpifsiidpphef  
LKYI.....ENSGLVSRYFYLD.....NILYFAENRN.....SPVLGTIHLKDA..QVNRYNAN.....lpifsiidpphef  
LAFSsdlqvvGKSGWHKYWVLDH.....GKICEYANWK...qsiELHTEPIDLLMA..TVRPAQSV.....  
CQQG....gDCPYWRRRYFQLIG.....SKLVAFQQFS.....KVRATIDLSEA.tHIVDDNHY.....sdee  
/YSfrffssLFRKRKPRTFILTN....fgRYLCVASDGE....grKTVKEEIPKSV..GMRCRMVK.....  
FQSeShkfrKKEVWSTVLAVLQR.....DVFTLYNLNTdpkdldISKVGKPVIKTT..IIASLAKP.....fpssed  
HWLH....gNLHRWSKCWAVVRG.....YGMTIYNTNR.....eYKPVKVIPIADI.qDVAEINVP.....

;nseQGKNKFILRTnSN.....glihrgHNWVFKVDSYDDMIEWFGNIKALSS  
lyaaslgKGKYCFKLVPpQP.....gskkgltftepRVHYFAVENKSEMKAWSAIKATI  
ftdwwLFNECFQLVFDG.....ERITFNAECSEEKSDWYNKLQEVVE  
jSATKTFKLYTdES.....-TFKFNADSEFSAKSWVNALKKEQF  
!tgeNYQSAFVIQEkQT.....etrtgtaTVHVLLARDVEDQKSWLRILRQVP  
!tgeNYQSAFVIQEkQT.....etrtgtaTVHVLLARDVEDQKSWLRILRQVP  
.....SRKFCFEVITpQT.....-KRTYQATSKAEMHSWIEAIQYSIS  
elegyIYFESGFRIIFsNG.....DYIDFYAETVGEKDEWMSTLRQHLG  
.NNEHGWWVETpTK.....-SWSFEDPNG-PASAWVELLDKASS  
lavvksTNSLYFDLETsSQ.....LKLRFAGPSPKDAQGWIDALNYWAA  
.esSHKYFFTVITqNK.....-PIEFRVDNEDSLILWVAALKTSID

|            |                        |              |   |            |          |          |
|------------|------------------------|--------------|---|------------|----------|----------|
| Celegans   | sec7-PH1               | NP_498764    | C | 263..391   | 49.55871 | 12.60603 |
| Celegans   | let-502-PH1            | NP_491440    | C | 952..>1034 | 13.01202 | 2.55186  |
| Celegans   | obr-1-PH1              | NP_499448    | C | 64..152    | 11.7475  | 10.13831 |
| Celegans   | F59A6.5-PH1            | NP_494921    | C | 834..940   | 11.48228 | 0.762221 |
| Cerevisiae | SLM2-PH1               | NP_014351    | C | 448..553   | 20.63529 | 8.396013 |
| Cerevisiae | BOI1-PH1               | NP_009468    | C | 779..893   | 16.96294 | 8.511027 |
| Cerevisiae | BUD4-PH1               | NP_012625    | C | 1306..1412 | 0.692037 | -2.74539 |
| Cerevisiae | ATG26-PH1              | NP_013290    | C | 241..333   | 0.510442 | -5.36333 |
| Drosophila | CG5004-PH1             | NP_573195    | C | 1143..1237 | 30.65888 | 7.631296 |
| Drosophila | vap-PH1                | NP_996482    | C | 394..483   | 11.86322 | 3.56381  |
| Pombe      | reserved_name_rga2-PH1 | NP_594152    | C | 722..835   | 6.859368 | 5.492493 |
| Pombe      | SPAC26A3.09c-PH1       | CAA93232     | C | 722..835   | 6.859368 | 5.492493 |
| Pombe      | csx2-PH1               | NP_595897    | C | 513..612   | 5.550006 | 0.909318 |
| Pombe      | SPAPYUG7.03c-PH1       | NP_594704    | C | 584..684   | 5.464721 | 5.732295 |
| Pombe      | ksg1-PH1               | NP_588442    | C | <495..570  | 3.883014 | 1.060725 |
| Pombe      | SPAC11E3.11c-PH1       | NP_594936    | C | 683..806   | -0.83699 | -9.89105 |
| Pombe      | SPCPB16A4.02c-PH2      | NP_588026    | C | 225..317   | -7.08751 | -2.91975 |
| Celegans   | akt-2-PH1              | NP_001024612 | T | 13..114    | 20.79403 | 11.46032 |
| Celegans   | akt-1-PH1              | NP_001023647 | T | 16..117    | 9.549298 | 12.17148 |
| Drosophila | Grp1-PH1               | NP_001036375 | T | 356..480   | 65.83189 | 24.28059 |
| Drosophila | Akt1-PH1               | NP_732113    | T | 107..210   | 34.2812  | 16.92682 |
| Drosophila | CG14366-PH1            | NP_650310    | T | 375..468   | 11.99604 | 5.974204 |
| Celegans   | mtm-5-PH1              | NP_508888    |   | 1646..1742 | 16.80814 | 12.46176 |
| Cerevisiae | OSH3-PH1               | NP_011940    |   | 224..313   | 17.18968 | 8.150776 |
| Cerevisiae | BOI2-PH1               | NP_011039    |   | 771..882   | 15.47084 | 6.390439 |
| Cerevisiae | OPY1-PH1               | NP_009687    |   | 218..315   | 7.47558  | -0.75313 |
| Cerevisiae | SLM1-PH1               | NP_012161    |   | 471..577   | 7.089197 | 0.307673 |
| Cerevisiae | SWH1-PH1               | NP_009421    |   | 284..377   | 2.664051 | 1.000236 |
| Cerevisiae | SPO14-PH1              | NP_012956    |   | 498..660   | 1.270814 | 1.375714 |
| Cerevisiae | CLA4-PH1               | NP_014101    |   | 64..174    | -1.96565 | -6.26106 |
| Cerevisiae | OSH2-PH1               | NP_010265    |   | 292..384   | -2.48795 | 2.301501 |
| Drosophila | Btk29A-PH1             | NP_723369    |   | 43..182    | 21.29646 | 8.839298 |
| Drosophila | Sbf-PH1                | NP_731633    |   | 1872..1972 | 18.98951 | 11.60579 |
| Drosophila | CG12467-PH1            | NP_477389    |   | 654..742   | 15.5075  | 16.54281 |
| Pombe      | SPCPB16A4.02c-PH1      | NP_588026    |   | 28..106    | 11.78241 | 3.929772 |
| Pombe      | SPAC26A3.10-PH1        | NP_594153    |   | 529..630   | 10.73578 | 2.185209 |
| Pombe      | pob1-PH1               | NP_596828    |   | 701..806   | 6.27789  | 1.345219 |
| Pombe      | SPBC1289.04c-PH1       | CAB38684     |   | 701..806   | 6.27789  | 1.345219 |
| Pombe      | SPBC17G9.08c-PH1       | CAB52806     |   | 513..612   | 5.550006 | 0.909318 |
| Pombe      | SPAC6G9.04-PH1         | NP_594113    |   | 1053..1154 | 4.629944 | -3.21248 |
| Pombe      | SPCC576.15c-PH1        | CAA21194     |   | <495..570  | 3.883014 | 1.060725 |
| Pombe      | SPAC19A8.02-PH1        | NP_593790    |   | 292..388   | 1.384858 | 0.630635 |
| Pombe      | plc1-PH1               | NP_594734    |   | 161..271   | 1.197574 | 5.504969 |
| Pombe      | SPAC22F8.11-PH1        | CAB52721     |   | 161..271   | 1.197574 | 5.504969 |
| Pombe      | SPAC637.13c-PH1        | NP_594631    |   | 303..403   | 0.276965 | 2.858547 |
| Pombe      | SPBC2F12.05c-PH1       | NP_595710    |   | 257..340   | -0.45491 | 4.188521 |
| Pombe      | SPAC23H3.01-PH1        | NP_001018249 |   | <707..768  | -1.7977  | -2.02607 |
| Pombe      | SPAC19A8.01c-PH1       | CAB16232     |   | <285..346  | -1.7977  | -2.02607 |
| Pombe      | SPAC1F5.09c-PH1        | NP_592864    |   | 26..122    | -4.7572  | -11.8294 |
| Pombe      | SPAC2F7.16c-PH1        | NP_592986    |   | 394..510   | -7.01332 | -8.7836  |
| Pombe      | SPBC428.07-PH1         | NP_595185    |   | <194..256  | -9.84818 | -9.0019  |

|       |                  |           |          |          |          |
|-------|------------------|-----------|----------|----------|----------|
| Pombe | SPAC23H4.01c-PH1 | NP_593405 | 152..241 | -14.2623 | 1.69321  |
| Pombe | SPCp054-PH1      | NP_588075 | 805..898 | -23.5296 | -10.8256 |
| Pombe | SPCC4B3.15-PH1   | CAB60689  | 805..898 | -23.5296 | -10.8256 |

10 AEREGWLFKQSSnplfsGALSWKKRWFVLSE.....NCLYYFDQMT.....dKEPKGIITLANV..GI  
8 IQMEGWLSLRD.ntkksRKPWTNCFVALNE.....YSFTIYVDE-.....-KAVSVILLIEA..GAMAf  
6 VEKAGWLNKWT.....nYLKGYRQRWFVLDSE.....nATLSYYRNPS...evgHTCRGSINLQEA..F  
3 GRMNGWLRVYR...ddmTGSTWIASWAMMDL.....TRISFYTNDG...adIEKPFPSIDLNKE..C  
9 EVKSGFLEKRS.....kFLKSYSRGFYVLT.....SFLHEFKTPD..khkfSTPLMSIPLVEC..TVTE  
9 ADCSGWMSKKG...tgAMGTWKQRFFTLHG.....TRLSYFTNTN.....dEKERGLIDITAH..RV  
7 IYKEGYLLQDG...gdLKGKIENRFFKLHG.....SQLSGYHEI-.....-SRKAKIDINLL..KVTKVLF  
4 VKMSGNLNIRT.....KLIRSTRYWCVLKN.....HLFSMYTSST...eYFPVLTIDLREV.qKIETQ  
8 HSCRGYLHKLK...aTFHAWSRWFVLDLDR.....qrSALIYYSDKS.....eRKPRGGAYFATI.dEV  
9 IKHHGHLNKKK...dKTTKWKQLYFALIN...dgseTQLCFYDNPK.....kTKPKGLIDLSCA..YLY  
4 AQKEGVLLKYI.....ENSGLVSRFYFLK.....NILYFAENRN.....SPVLGTIHLKDA..QVNRVY  
4 AQKEGVLLKYI.....ENSGLVSRFYFLK.....NILYFAENRN.....SPVLGTIHLKDA..QVNRVY  
5 SAKQGLLLAFSsdIqvvGKSGWHKYWVVDLH.....GKICEYANWK...qsIELHTEPIDLLMA..T  
6 LLCDDGYLCQQG...gDCPYWRRRYFQLIG.....SKLVAFQQFS.....KVRRTIDLSEA.tHIVC  
10 ISKIGTLNVYSfrffssLFRKRKPRFTILT.....fgRYLCVASDGE...grKTVKEEIIPIKSV..GMRCF  
8 YIKQGILKFQSSeshkfrKKEVWSTVLAVLQR.....DVFTLYNLNTdpkldIDSKVGKPVIKTT..IIAS  
6 VLMQGTIHWLH...gNLHRWSKCWAVVRG.....YGMTIYNTNR.....eYKPVKVIPIADI.qDVA  
9 IVIESWLHKKG...eHIRNWRPRYFILFR.....dGTLLGFRSKP...kEDQPLPEPLNNF..MIRD  
9 VVIEGWLHKKG...eHIRNWRPRYFMIFN.....dGALLGFRAKP...KEGQPFPEPLNDF..MIK  
12 PDKEGWLWKQG...gRYKSWKRRWFILND.....NCLYYFEYTT.....dKEPRGIIPLENI..SVR  
8 VVKEGWLMKRG...eHIKNWRQRYFVLHS.....dGRLMGYRSKPSastpsDFLLNNFTVRGC.  
8 VTLSGWLHKQG...sdGLKVWRKRWFVLAE.....YCLYYKGP...eEKLKGSVLLPSY..RV  
8 PLCTGYLSKRG...aKLKLWVPRFFVLYP.....dsPKVYYYEDFE.nwhtaEKPSGCIDLVDLDF..K  
10 RYLQGYLLKKR...rkRLQGFKKRFFTLDF.....ryGTLSSYLNDH.....nQTCRGEIVISLS..SVS/  
9 ADFSGWMSKKG...sgAMSTWKTRFFTLHG.....TRLSYFSSTT.....dTRERGLIDITAH..RV  
14 QVCSGILYTKVkkklfNRAKWQKFVELTN...tsFNLYSFKTG-.....-KLKKSIIKLDKI.iDCIELI  
11 EIKSGFLERRS...kFLKSYSKGYVLT.....NFLHEFKTAD..rkdLVPVMSLALSEC..TVTE  
6 PTYKGYLKKWT...nFAQGYKLRWFILSS.....dGKLSYYIDQA...dtkNACRGSINLMS..SL  
7 QGKQGYLVIRSkhafkdMIDRHTTKWFLVRN.....SYLTYVSDLS...sTTPLDVFLIDWK.fkVF  
9 KKKSGWVSYKD...dgiLSFIWQKRYLMLHD.....SYVALYKNDK...qnDDAILKIPLTSI.iSVSR  
8 PTYKGFLLKWT...nFAHGYKLRWFILSG.....dGNLSYYKDQS...hvDRPRGTLKVSTC..RL  
13 VVKSGSMVKRAqknkrfTPVNYKHRWFELTK.....RTFSYFDVEN...verRRERGRHILKGV..rL  
7 RTHEGHLYKRG...aLLKGWKQRWFVLDSE.....ikHQLRYDTSE.....dTAPKGIIEAEV.qSV  
10 LEKMGHLAKLG...gKLKTWRKRWFVLKN.....GSLNYWKSQH...dvqRKPQGGIQLDEV.c  
6 VLKSGWLIKKG...hATSTKKQLWAVLRR.....DQLSFYKDE-.....-----KDI.sAVAYYKEK.  
6 IFKEGLLVFGtdlamvSKAAWHKHVVEN.....GSLWEYANWK...dsvKSNVSSISLKHA..S  
8 ADCHGWMRKRS...dRYGVWKSRYFVLKG.....TRLSYYHSLN.....dASEKGLIDMTSH..R'  
8 ADCHGWMRKRS...dRYGVWKSRYFVLKG.....TRLSYYHSLN.....dASEKGLIDMTSH..R'  
5 SAKQGLLLAFSsdIqvvGKSGWHKYWVVDLH.....GKICEYANWK...qsIELHTEPIDLLMA..T  
9 WHRRGMISYKksknrvVAGYWKKKYKIVDS.....GKLIFYKSDHnacsnvSPIHREFGLQSC.  
10 ISKIGTLNVYSfrffssLFRKRKPRFTILT.....fgRYLCVASDGE...grKTVKEEIIPIKSV..GMRCF  
6 TKRQGWLLRNlssskadNKAIWRKYWFFVDN.....GYVGYLINDA...nggVFSEKIGVLLC..K  
12 SIQNGCSLLRI.....TKKKVRQRKVSLDP...isGYLMLDKNTG...kaYKKLCVDDIKEI.rQGRD  
12 SIQNGCSLLRI.....TKKKVRQRKVSLDP...isGYLMLDKNTG...kaYKKLCVDDIKEI.rQGRD  
10 PIMAGYLIRKT.....SFLKKKQRGFYAFT...hsGYLYEFKSSD..slqdPEPEFALYIPDC..LIGR  
7 QHMSGYLKKWT...nYKSGYKLRWFTLNN.....GVLSYYKNQD...dasSACRGSINLKLA..R  
3 AQKKAYERRYK...NFTTTSSSFDTLQG...idTEAMEYEFKtppleeFSPDTSYSLVNA.fAY  
3 AQKKAYERRYK...NFTTTSSSFDTLQG...idTEAMEYEFKtppleeFSPDTSYSLVNA.fAY  
8 IIRSGWVMLKE...dkmKYLWPWTKKWLVLSS.....NSLSIYKGSK...sESAQVTLKDI.qKVE  
5 HGKEGFATLKRccnttmMKTRSQPFWIIVSE.....SCIILCDNML.....SMQPADVFIWDV..DFE  
2 PSLASEQMHS...dADSLFQSANDHLNRakatqdcRGLLFYSKQS...stSVPSGIINLTDA.vS

10 QIISGTLLKKR....rkKGQGYARRYFTLNM.....veGTISYYANEN.....sSVMRGKIPLSIA..VISV/  
7 LYNEGYLRLRLE.....-DSSIRRRFVVLRS.....KQLNFYAEKG.....GQYLDTFQLSKT..VVSIP  
7 LYNEGYLRLRLE.....-DSSIRRRFVVLRS.....KQLNFYAEKG.....GQYLDTFQLSKT..VVSIP

IRKVEAP.....SRPFMFEIFSISD..gqikackteqgrlvegrhSIYKICAVNDEDMRSWINAISRMM  
-IVR-.....-HVTAADLRNvDD.....sqlpKIFHIMYDD-----ASCNSSRH  
RVHTDKT-.....--TSCIVISGqSQ.....-TFHVKPNEMDRQQWTNSLEYMRH  
QWVLRGTGQ.....empvdcddsmRANNVLMIKMpRR.....-CLYLAPSQPSARRWAECLQ1  
:HSKK.....tknsenQGKNKFILRTnSN.....glihrghNWVFKVDSYDDMIEWFGNIKALSS  
LPASDD.....drlisyaaslgKGYCYFKLVpPQP.....gskkgltftepRVHYFAVENKSEMKAWLSAIKAT  
RN.....ediqadnggrnftdwlFNNECFQLVFDG.....ERITFNAECSEEKSDWYNKLQEVVE  
!KHT.....IngSATKTFKLYTdES.....-TFKFNADSEFSAKSWVNALKKEQF  
'YLDHLN.....asksgRPHCTFIVKTKKR.....-SYNLQAASDSAARIWIDAITGAQ  
QCHDS.....lwERPycFQIVeRAL.....pclaTVTYLCAPSQESYVEWINSLKAQCD  
NAN.....lpifsiidppheftgeNYQSAFVIQEKQT.....etrtgtaTVHVLLARDVEDQKSWLRRAILRQVP  
NAN.....lpifsiidppheftgeNYQSAFVIQEKQT.....etrtgtaTVHVLLARDVEDQKSWLRRAILRQVP  
VRPAQSV.....SRKFCFEVITpQT.....-KRTYQATSKAEMHSHWIEAIQYSIS  
JDNHY.....sdeeelegylYFESGFRIIFsNG.....DYIDFYAETVGEKDEWMSTLRQH LG  
RMVK.....NNEHGWWVETpTK.....-SWSFEDPNG-PASAWVELLDKASS  
JLAKP.....fpssedavviksTNSLYFDLETsSQ.....LKLRFAGPSPKDAQGWIDALNYWAA  
EINVP.....esSHKYFFTvitqNK.....-PIEFRVDNEDSLILWVAALKTSID  
AATV.....cldkPRPNMFIVRCIQW.....ttvIERTFYADSADFRQMWIEAIQAVSS  
DAATM.....lfekPRPNMFMVRCIQW.....ttvIERTFYAESAEVRQRWIHAIESISK  
EIHDR.....SKPHCFELFAtGG.adiikacktdsegkvvegkhTVYRMSAATEEDQQEWIKRLTQS  
..QIMTVDRP.....-KPFTFIIRGIQW.....ttvIERTFAVESELERQQWTEAIRNVSS  
/SACLPE.....dkiYRKFAFKCEHqNM.....RTYWLAADNSEAMMQVVRALAAASL  
SFNLEQT.....GRRGLIELHMkNK.....-THRLLSENINEAIRWKECIEQVIR  
ANKK-.....--DKIIIDSgME.....-VWVLKATTKENWQSWVDALQTCFD  
/PAKED.....dklvslyaastgKGRYCFKLLPpQP.....gskkgltftqpRTHYFAVDNKEEMRGWMAALIK'  
DNN.....skmNDDTNFALITfDE.....-RLSFKAANDQDMVDWIINFKSGIL  
HSRK.....nstsspntGSDAKFVLHAKQN.....giirrgHNWVFKADSYESMMSWFDNLKILTS  
.HLDSS-.....-EKLFKEIIGgNN.....gvIRWHLKGNHPIETNRWVWAIQGAIR  
RFSGNKleefgiendannildkngskthqksNISSKLLLLTIEN.....seRKLKIICKSESLKQWMSSIIKM  
TQL-.....-KQYCFELVRcSDrnsvsngsssslnvssdsnsKSIYIATKTESDLHSWLDAIFAKCP  
.HIDSS-.....-EKLNPELLGgIT.....gtTRWRLKGNHPIETTRWVNAIQSAIR  
.VEEATVS.....geggdpfaPDGYPFQVGYcElgnngggsgvgieggqsgravpqYTLYVIANSEKERSEWIR  
TAAQPA.....qigakgvDEKGFDFLKTsKR.....-IYNFYAINANLAQEWIEKLQACLQ  
RINRAEG-.....-ASTFEIDTgKK.....-VYYLTADSHATMDDWIRVLQNVQR  
.....-SPKTFFLYLnEK.....-IIRLIATSNEDAEWVHVLRSTTG  
ADKVRKQ.....GRRFCFEVVTpKL.....-KRLYQATSAEEMDSWIEAICEAAK  
VTKTDDI.....vlsGGKTAIKLIPpAP.....gaakaavmftppKVHYFTCENNEELHRWSSAFLKAT  
VTKTDDI.....vlsGGKTAIKLIPpAP.....gaakaavmftppKVHYFTCENNEELHRWSSAFLKAT  
VRPAQSV.....SRKFCFEVITpQT.....-KRTYQATSKAEMHSHWIEAIQYSIS  
..LASP NLPP.....sinsNRNNVFYLNlpGN.....ECYLFEAPSVLAMNEWIHSLNFNAA  
RMVK.....NNEHGWWVETpTK.....-SWSFEDPNG-PASAWVELLDKASS  
.FSVLPSN.....HRKFCFQIKTKSV.....-SYILQAETHMEMLEWGSVINNARE  
JARNY.....reqykisseNEKRWFIIYcAD.....nkIKAMHMISPTLDAHNSWIMALEGLKT  
JARNY.....reqykisseNEKRWFIIYcAD.....nkIKAMHMISPTLDAHNSWIMALEGLKT  
PSE-.....-KKPKFKITGkDA.....tkkifgarNDYAFRASNNTELMRWWEALNTHIA  
LVHDPK-.....-QPTVFQVIGkGS.....VRYSVKANSPVEAKKWIAAIISSAIE  
'CDRDKK.....nVRNCSFTVIFrDG.....SEETLCAPTEESMIEWVAKINYIST  
'CDRDKK.....nVRNCSFTVIFrDG.....SEETLCAPTEESMIEWVAKINYIST  
.RSKS-.....-RTFCFKLRFkSS.....tknfeiQACELSVADNMCEYEWMDLISSRAL  
ITRKN.....frkahskdtnekirLSHHSFKIKNRqK.....-VMKLSVRSg---RWLQQFINSVQ  
IEPGTG-.....---NKFTINFnNG.....KSETLEALDPESKNTWITDLKNAIA



AAE-.....-THEINVDSgVE.....-LWNLRAHTHQDWLRWCNALEKAKN  
MVN.....fseavsnIGLVAGILATSvDR.....RHVQLFADSKKVCQKWLQVMNSRSF  
MVN.....fseavsnIGLVAGILATSvDR.....RHVQLFADSKKVCQKWLQVMNSRSF

A

ΓAQR

ἦ

IS

TTI

ST

ἄAIRQVCE

V

V

|           |          |   |         |        |
|-----------|----------|---|---------|--------|
| vap-PH1-D | NP_99648 | C | IKHHGHL | T_Dros |
| CG5004-P  | NP_57319 | C | HSCRGYL | T_Dros |
| CG14366-I | NP_65031 |   | VTLSGWL | T_Dros |
| CG12467-I | NP_47738 | T | LEKMGHL | T_Dros |
| Btk29A-PH | NP_72336 | T | VVKSGSM | T_Dros |
| Akt1-PH1- | NP_73211 | T | VVKEGWL | T_Dros |
| Grp1-PH1- | NP_00103 | T | PDKEGWL | T_Dros |

|            |          |   |          |            |
|------------|----------|---|----------|------------|
| F59A6.5-P  | NP_49492 | C | GRMNGW   | T_Celegans |
| obr-1-PH1- | NP_49944 | C | VEKAGWL  | T_Celegans |
| let-502-PH | NP_49144 | C | IQMEGWL  | T_Celegans |
| akt-1-PH1- | NP_00102 | T | VVIEGWL  | T_Celegans |
| akt-2-PH1- | NP_00102 | T | IVIESWLH | T_Celegans |
| sec7-PH1-  | NP_49876 | C | AEREGWL  | T_Celegans |

Type of file: table

Label: Table 5

Filename: mmc10.xls

**Supplementary Table 4, Park et al:  
Scoring of tested mouse PH-domains (used to make Fig. 5C)**

| Species | Name             | Score | NP_number    | Cloned and Tested Translocating? |
|---------|------------------|-------|--------------|----------------------------------|
| Mouse   | PSCD3-PH         | 100.6 | NP_035312    | T                                |
| Mouse   | PSCD2-PH         | 99.9  | NP_035311    | T                                |
| Mouse   | PSCD1-PH         | 98.1  | NP_035310    | T                                |
| Mouse   | AKT3-PH          | 66.5  | NP_035915    | T                                |
| Mouse   | AKT2-PH          | 64.9  | NP_031460    | T                                |
| Mouse   | AKT1-PH          | 64.6  | NP_033782    | T                                |
| Mouse   | RASA2-PH         | 60.2  | NP_444498    | T                                |
| Mouse   | TEC-PH           | 58.5  | BAE23957     | T                                |
| Mouse   | BTK-PH           | 57.5  | NP_038510    | T                                |
| Mouse   | ITK-PH           | 54.6  | NP_034713    | T                                |
| Mouse   | GAB1-PH          | 50.1  | NP_067331    | T                                |
| Mouse   | GAB2-PH          | 44.4  | NP_034378    | T                                |
| Mouse   | PLEKHA1-PH       | 40.8  | NP_598703    | T                                |
| Mouse   | PLEKHA2-PH2      | 38.4  | NP_112547    | T                                |
| Mouse   | DAPP1-PH         | 37.0  | NP_036062    | T                                |
| Mouse   | PHLDB1-PH        | 36.4  | NP_705765    | T                                |
| Mouse   | SH3BP2-PH        | 34.5  | NP_036023    | T                                |
| Mouse   | PLEK2-PH         | 33.8  | NP_038766    | T                                |
| Mouse   | PLEK2-PH2        | 31.7  | NP_038766    | T                                |
| Mouse   | PDPK1-PH         | 28.1  | NP_001074242 | T                                |
| Mouse   | MYO10-PH         | 25.5  | NP_062345    | T                                |
| Mouse   | OSBPL3-PH        | 24.6  | NP_082157    | T                                |
| Mouse   | CNKSR2-PH        | 23.5  | NP_808419    | T                                |
| Mouse   | OSBPL7-PH        | 23.4  | NP_001074903 | T                                |
| Mouse   | PHLPP-PH         | 20.2  | XP_990044    | T                                |
| Mouse   | FGD6-PH2         | 19.1  | NP_444302    | T                                |
| Mouse   | PLEK-PH2         | 17.0  | NP_062422    | N                                |
| Mouse   | PLEKHO1-PH       | 5.6   | NP_075809    | N                                |
| Mouse   | MYO10-PH2        | 4.7   | NP_062345    | N                                |
| Mouse   | IRS1-PH          | 4.5   | NP_034700    | N                                |
| Mouse   | PLEKHB2-PH       | 4.5   | NP_663491    | N                                |
| Mouse   | SKAP2-PH         | 4.3   | NP_061243    | N                                |
| Mouse   | PLEKHA5-PH       | 3.5   | NP_659169    | N                                |
| Mouse   | DGKD-PH          | 3.4   | XP_911321    | N                                |
| Mouse   | TRIOBP-PH        | 3.3   | NP_613045    | N                                |
| Mouse   | RASAL1-PH        | 2.8   | NP_038860    | N                                |
| Mouse   | 2610034M16Rik-PH | 1.7   | NP_081686    | N                                |
| Mouse   | M-RIP-PH2        | 0.6   | NP_957697    | N                                |
| Mouse   | PLEKHM2-PH       | 0.2   | XP_985312    | N                                |
| Mouse   | PSD3-PH          | -2.2  | NP_808366    | N                                |
| Mouse   | PSD2-PH          | -2.2  | NP_082983    | N                                |
| Mouse   | CENTD2-PH        | -2.3  | NP_001035201 | N                                |
| Mouse   | M-RIP-PH         | -3.5  | NP_957697    | N                                |
| Mouse   | CENTB5-PH        | -4.3  | NP_997106    | N                                |
| Mouse   | DNM2-PH          | -4.7  | NP_001034609 | N                                |
| Mouse   | SWAP70-PH        | -5.0  | NP_033328    | N                                |
| Mouse   | ARHGAP10-PH      | -5.1  | NP_598723    | N                                |

|       |                   |       |              |   |
|-------|-------------------|-------|--------------|---|
| Mouse | DNM1-PH           | -5.4  | NP_034195    | N |
| Mouse | OPHN1-PH          | -6.6  | NP_443208    | N |
| Mouse | PLEKHB1-PH        | -7.1  | NP_038774    | N |
| Mouse | PLEKHJ1-PH        | -7.9  | NP_076389    | N |
| Mouse | RALGPS2-PH        | -8.0  | NP_076373    | N |
| Mouse | FARP1-PH2         | -8.2  | NP_598843    | N |
| Mouse | DOK4-PH           | -8.2  | NP_444476    | N |
| Mouse | CENTD1-PH         | -8.7  | XP_001001345 | N |
| Mouse | PLEKHF1-PH        | -8.8  | NP_077724    | N |
| Mouse | AFAP-PH           | -8.8  | NP_081649    | N |
| Mouse | PLEKHA3-PH        | -9.1  | NP_112546    | N |
| Mouse | PLCD1-PH          | -9.3  | NP_062650    | N |
| Mouse | 2610034M16Rik-PH2 | -9.6  | NP_081277    | N |
| Mouse | VEPH-PH           | -10.6 | NP_082633    | N |
| Mouse | CADPS-PH          | -11.4 | NP_001036082 | N |
| Mouse | PLCL2-PH          | -11.9 | NP_038908    | N |
| Mouse | RASA4-PH          | -11.9 | NP_598675    | N |
| Mouse | ABR-PH            | -12.4 | NP_942598    | N |
| Mouse | PRKCM-PH          | -12.8 | NP_032884    | N |
| Mouse | RASGRF1B-PH       | -13.0 | NP_001034744 | N |
| Mouse | FGD6-PH           | -14.0 | NP_444302    | N |
| Mouse | PLCD4-PH          | -14.4 | NP_683739    | N |
| Mouse | COL4ABP3-PH       | -14.4 | NP_075909    | N |
| Mouse | PLEKHM1-PH        | -14.8 | NP_898855    | N |
| Mouse | SH2B2-PH          | -15.0 | NP_061295    | N |
| Mouse | DOK1-PH           | -15.3 | NP_034200    | N |
| Mouse | NGEF-PH           | -15.7 | NP_063920    | N |
| Mouse | KIF1A-PH          | -16.0 | NP_032466    | N |
| Mouse | CIT-PH            | -16.2 | NP_031734    | N |
| Mouse | PLEKHA2-PH        | -16.5 | NP_112547    | N |
| Mouse | DDEF1-PH          | -17.3 | NP_034156    | N |
| Mouse | TIAM1-PH2         | -17.4 | NP_033410    | N |
| Mouse | FGD1-PH2          | -17.7 | NP_032027    | N |
| Mouse | SNTA1-PH          | -17.9 | NP_033254    | N |
| Mouse | PLD2-PH           | -18.1 | NP_032902    | N |
| Mouse | CENTD1-PH2        | -18.3 | XP_001001345 | N |
| Mouse | FGD2-PH           | -18.7 | NP_038738    | N |
| Mouse | GEFT-PH           | -18.7 | NP_082303    | N |
| Mouse | NET1-PH           | -18.8 | NP_062645    | N |
| Mouse | SNTB2-PH          | -19.0 | NP_033255    | N |
| Mouse | KIF1B-PH          | -19.2 | NP_997565    | N |
| Mouse | DOK5-PH           | -19.3 | NP_084037    | N |
| Mouse | TIAM1-PH          | -19.5 | NP_033410    | N |
| Mouse | SH2B1-PH          | -19.9 | NP_035493    | N |
| Mouse | PLEKHC1-PH        | -20.7 | NP_666166    | N |
| Mouse | APBB1IP-PH        | -21.3 | NP_062329    | N |
| Mouse | ADRPK1-PH         | -21.3 | NP_570933    | N |
| Mouse | SPNB2-PH          | -22.6 | NP_787030    | N |
| Mouse | ITSN1-PH          | -22.9 | NP_034717    | N |
| Mouse | CENTD2-PH2        | -24.0 | NP_001035201 | N |
| Mouse | FARP1-PH          | -24.3 | NP_598843    | N |
| Mouse | TIAM2-PH          | -24.5 | NP_036008    | N |
| Mouse | PLD1-PH           | -25.5 | NP_032901    | N |

|       |              |       |           |   |
|-------|--------------|-------|-----------|---|
| Mouse | SNTB1-PH     | -25.6 | NP_057876 | N |
| Mouse | RASGRF2-PH   | -25.9 | NP_033053 | N |
| Mouse | RASGRF2-PH2  | -27.2 | NP_033053 | N |
| Mouse | ARHGEF7-PH   | -28.9 | NP_059098 | N |
| Mouse | OSBPL5-PH    | -29.1 | NP_077251 | N |
| Mouse | KALRN-PH     | -29.5 | XP_998128 | N |
| Mouse | RASGRF1A-PH  | -30.3 | NP_035375 | N |
| Mouse | ARHGEF3-PH   | -30.7 | NP_082147 | N |
| Mouse | ROCK1-PH     | -30.8 | NP_033097 | N |
| Mouse | FGD1-PH      | -31.6 | NP_032027 | N |
| Mouse | FGD1-PHB     | -31.6 | NP_032027 | N |
| Mouse | GRB14-PH     | -32.5 | NP_057928 | N |
| Mouse | FGD3-PH      | -32.9 | NP_056574 | N |
| Mouse | MCF2-PH      | -33.0 | NP_573460 | N |
| Mouse | ITSN2-PH     | -33.0 | NP_035495 | N |
| Mouse | AKAP13-PH    | -34.6 | XP_984499 | N |
| Mouse | ARHGEF2-PH   | -35.0 | NP_032513 | N |
| Mouse | ARFGEF18-PH  | -35.0 | NP_084389 | N |
| Mouse | MCF21-PH     | -35.4 | NP_835177 | N |
| Mouse | GRB7-PH      | -36.7 | NP_034476 | N |
| Mouse | RASGRF1A-PH2 | -38.5 | NP_035375 | N |
| Mouse | RGNEF-PH     | -39.3 | NP_036156 | N |
| Mouse | VAV3-PH      | -40.8 | NP_065251 | N |
| Mouse | GRB10-PH     | -42.0 | NP_034475 | N |
| Mouse | VAV2-PH      | -42.1 | NP_033526 | N |
| Mouse | VAV1-PH      | -43.5 | NP_035821 | N |
| Mouse | VAV2-PHB     | -43.9 | NP_033526 | N |
| Mouse | SOS1-PH      | -46.6 | NP_033257 | N |
| Mouse | SOS2-PH      | -48.4 | XP_992919 | N |

| Sequence                                                                                                            |                                                             |  |  |
|---------------------------------------------------------------------------------------------------------------------|-------------------------------------------------------------|--|--|
| PDREGWLLKLG.....gRVKVTWKRWFILTD.....NCLYYFEYTT.....dKEPRGIIPLLENL..SIREVEDP.....                                    | RKPNCFCELYpSHkgqvickackteadgrvegnhVVYRISAPSPEEKEEWMSKISAKIS |  |  |
| PDREGWLLKLG.....ggRVKVTWKRWFILTD.....NCLYYFEYTT.....dKEPRGIIPLLENL..SIREVDDP.....                                   | RKPNCFCELYpNNkgqlikackteadgrvegnhMVYRISAPTQEEKDEWIKSIQAAVS  |  |  |
| PDREGWLLKLG.....ggRVKVTWKRWFILTD.....NCLYYFEYTT.....dKEPRGIIPLLENL..SIREVEDS.....                                   | KKPNCFCELYpDDkdqvickackteadgrvegnhTVYRISAPTPEEKEDWIKCIKAAIS |  |  |
| IVKEGWVQKRG.....eYIKNWRPRYFLLKT.....dGSFIGYKEKP.qdvdIPYPLNNFSVAKC..QLMKTERP.....                                    | -KPNTFIIRCIQW.....ttvIERTFHVDTPPEEREWEAIAQAVAD              |  |  |
| VIKEGWLHKRG.....eYIKTWRPRYFLLKS.....dGSFIGHKERPeapdqLPLNNFSVAEC..QLMKTERP.....                                      | -RPNTFVIRCIQW.....ttvIERTFHVDSPDEREEWMRAIQMVAN              |  |  |
| IVKEGWLHKRG.....eYIKTWRPRYFLLKN.....dGTFIGYKERPqdvqdrESPLNNFSVAQC..QLMKTERP.....                                    | -RPNTFIIRCIQW.....ttvIERTFHVETPEEREWEATAIQTAVAD             |  |  |
| HLKEGEMKYRAqgrtriGKKNFKKRWFCLTS.....RELTYHRQQG.....KDAIYTIPVKNI.IAVEKLEEG.....                                      | -sfnKNMFQVIHEK.....-TLYIQANNCVEANEWIDVLCRVSR                |  |  |
| TILEEILIKRSqqkkktSPLNYKERLFLVLT.....SVLSYEGRA.....ekKYRKGVIDISKI..KCVEIVKN.....                                     | ddgvipcQNKFPFQVHdAN.....-TLYIFAPSPQSRDRVWVKLKEEIK           |  |  |
| VILESIFLKRSqqkkktSPLNFKKRLLFTV.....HKLSYYEYDF.ergrrGSKKGSIDVEKI..TCVETVIPeknprrqjprgeessemeqisiieRFPYPFQVVYDEG..... | -PLYVFSPTTELKRKRWIHLKNVIR                                   |  |  |
| ILLEEQLIKRSqqkkrtSPSNFKVRFVLT.....ASLAYFEDRH.....gkkrTLKGSIELSRI..KCVEIVKS.....                                     | disipchYKYPFQVHdNY.....-LLYVFAPDCESRQRVWVTLKEETR            |  |  |
| VVCSGWLKRS.pekkiKRYAWKRWFVLRSGritgdpDVLEYYKNDH.....aKPIRIIDLNL.C.QQVDAGLTF.....                                     | nkkefENSYIFDINTIDR.....-IFYLVAADSEEDMNKWRVICIDICG           |  |  |
| VVCTGWLKRS.pekkiIRRYAWKKRWFILRSgrmsgdpDVLEYYKNEH.....sKKPLRIINLNL.C.eQVDAGLTF.....                                  | nkkeIQDSFVFDIKTsER.....-TFYLVAEATEADMNKWVQSICQICG           |  |  |
| VIKAGYCVKQG.....aVMKNWKRYYQLDE.....NTIGYFKSEL.....eKEPLRVIPLKEV.hKVQECKQS.....                                      | dimMRDNLFEIVTiSR.....-TFYVQADSPEEMHWSWIKAVSGAIV             |  |  |
| LIKSGYCVKQG.....nVRKSWKRFFALDD.....FTICYFKCEQ.....dREPLRTIPLKDVikTHECLVKS.....                                      | gdliMRDNLFEIITsR.....-TFYVQADSPEDMHSWIEGIAAVQ               |  |  |
| GTEGYLTKQG.....gLVKTWKRWFLLQR.....NELKYFKDQ.....-MSPEPIRIDLE.TECSAVQFD.....                                         | ysqERVNCFCLVFPFR.....-TFYLCAKTGVAEDEWIKLRWKL                |  |  |
| KVCRGYLIKMG.....gKIKSWKKRWFVDR.....IkRtLSYYVDKH.....eTKLKGVIYFOAI.eEVYDHLR.....                                     | saakspNPALTFCVKTDR.....-LYYMVAPSAEAMRWMDVIVTGAE             |  |  |
| VAKAGYLHKKG.gtqiQLLKWPLRFVVIHK.....RCIYFKSST.....sASPQGAFLSGY.nRVMRAAEE.....                                        | ttsNNVFPFKIiHISK.....khRTWFFSASSEDERKSWMALLRREIG            |  |  |
| VLKEGFLVKRG.....hiVHNWKRWFILRQ.....NTLLYYKLEG.grrvTPPKGRIVLDGC..TITCPLE.....                                        | yeNRPLLIKLTsTS.....TEYFLEACSREERDSWAFETGAIH                 |  |  |
| VVKQGYLSKQG.....hKRKNWKRWFVLR.....dpAFLHYDPSK.....eeNRPVGGFSLRGS.LVSALEDN.....                                      | gvptgvknVQGNLFKVTkDD.....THYYIQASSKAERAEWIEAIKLT            |  |  |
| ILKMGVVDKRR.....GLFARRRQLLLE.....gPHLYYVDPVN.....KVLKGEIPWSQE.IRPEAKNF.....                                         | -KTFVHTpNR.....-TYYLMDPGSG-NAHKWCRKIQEVWR                   |  |  |
| ALKQGWLHKKGggsstISRRNWKRWVFLRQ.....SKLMYFENDS.....eEKLKGTVEVrTA.keIIDNTS.....                                       | -KENGIDIIaDR.....-TFHLIAESPEDASQWFSVLSQVHS                  |  |  |
| PVQKGFLKRR.....kwPLKGWKWRWFVLEK.....GILKYAKSQ.....-ADIEREKHLGC.iDVGLSVM.....                                        | vkKSSCIDLDTeEH.....-IYHLKVKSEELDFDEWVSKLRHRM                |  |  |
| GDCEGWLWKKK.daksyFSQWKWKYVFLKD.....ASLYWYINEE.....dEKAEGFISLPEF..KIDRASEC.....                                      | RKKYAFKACHpKI.....KSFYFAAEHLDDMNRLNINMLTA                   |  |  |
| ERQEGHLLKKR.....kwPLKGWKWRWFVLED.....GILHYATTRQ.ditKGVHGSDVRLS..VMSINKK.....                                        | -AQRIDLTeDN.....-IYHLKIKSQDLFHSWVAQLRAHL                    |  |  |
| IQLSGMYNVRK.gkmqIPVNRWTRRQVILCG.....TCLIVSSVKD.....svSGKMHVPLIGG..KVEEVK.....                                       | -HQHCLAFSSsGP.....qsQTYIICFDTFEYLRWLRQVSKVAS                |  |  |
| STMSGYLYRSK.....gSKPWKWRWFVILKN.....KVLTYAASE.....dVAALLESQPLLGF..TVTLVKDE.....                                     | nSESKVLDLHkGM.....VFYVFKADDAHSTQRWIDAFQEGTV                 |  |  |
| IIKQGCLLKQG.....hRRKNWKRWFVLR.....dpAYLHYDPAQ.....gEDPLGAVHLRGC..VVTSSVSS.....                                      | hdgkksDEENLFEITaDE.....VHYLQAATSKERTEWIKAIQVASR             |  |  |
| PEKVGWVRFKFC.gkgFREIWKRNRYVVLKQ.....DQLYVSEKEV.....kdeKNSQEVFDLSDY.eKCEELRKS.....                                   | ksrskKNHSKFTLArCQR.....pgttaPNLIFLAVSPEEKESWINALSSAIT       |  |  |
| FIVRGWLHKEVknspkmSSLKLRWFVLT.....NSLDYYKSE.....knALKGLTLVLSNL.cSVVPPDEK.....                                        | ifKTYGWNVTyGR.....kHCYRLYTKLLNEATRWSAIAQNVTD                |  |  |
| VRKVGYLRKPK.....SMHRRFFVLR.AaseagppARLEYENENEKkwrhksSAPKRSIPLESC.#NINKRADS.....                                     | KNKHLVALYTrDE.....-HFAIADSEAEQDSWYQALLQLHN                  |  |  |
| FVKSGWLLRQS.....tILKRWKKNWFDLWS.....dGHLIYYDDQT.....rqsIEDKVHMPVDCI..NIRTGHEC.....                                  | rdiqppdgkPRDCLLQIVCrDG.....KTISLCAESTDDCLAWKFTLQDSRT        |  |  |
| VIKAGYLEKRR.kdhsfLGFWEQKRWCALSK.....TVFYYSGSDK.....dKQKQGEFAIDGY..DVRMNTL.....                                      | rdgKDKCCFEICApDK.....RIYQFTAASPKDAEEWVQQLKFIQ               |  |  |
| VVRGWLKYKQD.....stGMKLWKRWFVLSL.....LCLFYRDEK.....eEGILGSILLPSF..QIAMLTAE.....                                      | dhiNRKYAFKAAHpNM.....RTYYFCTDTGKEMELWMKAMLAADAL             |  |  |
| ILKEGMLTKQN.....nSFQRSKRRYFKLRG.....RTLYYAKTAK.....SIIFDEVDLTD.A.SVAESSTK.....                                      | NVNSFTVITpCR.....-KLILCADNRKEMEDWIAALKTVQN                  |  |  |
| -----G-EWKKHWFVLT.....SSLKYRDST..aeeaDELGDGEIDLRS.C.iDVTEYAVQ.....                                                  | -RNYGFQIHTkDA.....-VYTLSAMTSGIRRNWIEALRKTVR                 |  |  |
| IVREGFLLRK.kepglaTRFAFKRYFRLSG.....RDLSSYSKTP.....WQVHTSIPLSI..RAVEHVDE.....                                        | gafQLPHVMQVtQDG.....agtsHTTYLQCKNVNDLNQWLSALRKASA           |  |  |
| PTCRGWLHKRT.....hsgFVKGWRKRWFVLEK.....dGFLYYKHKR..degkWPLDMIKLEGA..EVDIDNSL.....                                    | GKPFVFCMPqSG.....sRILCLCATSNQEMKRWLEAMQRAAR                 |  |  |
| NFKKGWLTkQY.....EDGQWKKHWFVVLAD.....QSLRYRDSV..aeeaADLDGEINLSTC.yDVTEYVQ.....                                       | -RNYGFQIHTkEG.....-EFTLSAMTSGIRRNWIQTIMKHVL                 |  |  |
| ITKEGMLHYKA.stsyIGKEHWKACFVLSN.....GILYQYDRT.....dVIPLLSNMNGGE..QCGCRRS.....                                        | nttdDRPHAFQVILaDR.....PCLLESADSEAMADWMLHLCQAVS              |  |  |
| VYKSGFLARKlgkktprGKRGWKTFYAVLKG.....TVLYLQKDEYekalseEDLKNASVHHA..LASKATDY.....                                      | ekKPNVFKLKTaDW.....RVLLFQTQSPEEMQGWINKINCVAA                |  |  |
| TYKHGVLTRK.TgktrpGRRGWKFFAVLKG.....TILYLOKDEYekalseGDLKNAIRVHHA..LATRASDY.....                                      | sKKSNNVLLKKTaDW.....RVFLFQAPSKEEMLSWILRINLVAA               |  |  |
| VSHSGFLYKTAIldqrAREEFRRWCVLGD.....GVLSYFENER.....avTPNREIRASEI.VCLAVPPP.....                                        | dthGFEHTFEVYTeGE.....RLYLFGLESAEQAHEWVKCIAKAFV              |  |  |
| PIYGGWLLAPfdnpvhRSRKRQRFFILYE.....HGLLRALDE..mptLPQGTINMNQC.iDVVDGEAR.....                                          | tGQKFSCLITpDK.....-EHFIRAETKEISGWLEMLMVPYR                  |  |  |
| VVMEGYLFKRA.....snAFKTVNRRWFVLSQ.....SQLVYQKKLK.....dALTVVVDDLRLC..SVKPCEDI.....                                    | ERRFCFEVSpTK.....-SCMLQADSEKLRQAWVQAVQASIA                  |  |  |
| VIRRGWLTINN.....isiMKGGSKEYWVFLTA.....ESLSWYKDEE.....eKEKKYMLPLDNL..KIRDVEKG.....                                   | fmSNKHVFAIFNtEQ.....mvykDIRQIELACDSQEDVDSWKASFLRAGV         |  |  |
| VLKQGYMMKKG.....hKRKNWTERWFVFLP.....NIISYYVSED.....IKDKKGIDLLDEN.cCVESLPDK.....                                     | dGKKCLFLIKCfDK.....-TFEISASDKKKKQEWIQAISTH                  |  |  |
| FTAEGYLYVQE.krapFGSSWVKHYMYRk.....takkFNMIPFEHRS.....ggkLGDGEAFLKEC..TKRHMDST.....                                  | DRRFCDIEAaDR.....pgVPLTVQAFSEERKQWLEALGGKEA                 |  |  |



VIRKGWLTINN...igiMKGGSKEYWFWLTA.....ENLSWYKDDE....eKEKQYMLSDVNDL...KLRDVEKG.....fmSSKHIFALFNtEQ.....mvykdyRQLELACETQEEVDSWKASFLRAGV  
PTIEGYLYTQE...kwaLGISWAKYCYRYEK...etrmLTMIPMEQKP...GAKQGPVDLTLK.yCVRRKTES.....iDKRFCDIEtNER.....pGTITLQAPSEANRRLWMEAMDKGKEP  
LVRGQVWRQWS...sILRRWKRNLFWALWL.....dGLTGGYHDET...aqdEEDRVVHFNNR...DIKVGQEC.....qdvgqpegSRDLGLTVNLRrEG.....SRLHLCAETRDDAIWTKALMEANS  
AEMAELGMRG...pkGGSVAKRRRLVKLVV.....NFLFYFRPDE...AEPLGALLERC...RVAQEE--...-PGGFSISfVED.....IsRKYHFECSSQEQCQDWMEALQRASY  
VTIQGVLRRTKteggkptVASRTKYWAALCG.....TQLFYAAKSerkhfkSTSNKNVSVVGV...MVMADDP.....EHPDFLLTDsEK.....gNSYKFAQGSRMNAMLWLKHLASAACQ  
NQLSGNLLRKF.....kNSNGWQKLWVFTN.....FCLFFYKSHQ...dSHPLASLPLLY...SLTIPSES.....eniHKDYVFKLHFkSH.....-VYFRAESEYTFERWMEVIRSATS  
IVKQGYVMKMS.....rKLGIRRCWLVFRK.ssskgpQRLEKYPDEK...svdIRGCPKVTEISNV.kCVTRLPEKE.....tKRQAVAIIFTdDS.....-ARTFTCDSELEAEWYKTLVSECL  
TFLCDFLYQAPIssekkLLEETNKKWCVLEG.....GFLSYENDK...sTTPNGTININEV.ICLAIHKE.....dfyIntGPIFIFEIYLpSE.....RVFLFGAETSQAQRKWTEAIAKHfV  
LLGEGVLTKEC.....RKKAKPRIFFLFN.....DILVYGSIVL.skrKYRSQHIIPELEV.TLEPLPET.....IQAKNRWMIKtAKK.....-SFVVSAASTTERQEWISHIEECVR  
AKICAFLLRKK.....RFGQWTKLLCVIKD.....TKLLCYKSSK...dQQQPMEPLQGC...SITYPDRD.....skKKKHELKITQqGT.....DPLVLAVQSKEQAEQWLKVIKEAYS  
--MEGVLYKWT...nYLTGWQPRWFLVDN.....GILSYDSDQ...dvcKSGSGSIKMAVC.EIKVHPA.....-DNTRMELIIPGE.....QHFYMKAVNAERQRWLVALGSSKA  
LLKGSQLLKVK.....SSSWRRERFYKLQE.....DCKTIWQESR.kvmrSPASQLFSIEDI.qEVRMGHRT.....eglekfardiPEDRCFSIVfKdQ.....rNTLDLIAPSPADVQHVVQGLRKiID  
PECLGLLHLE.....rSTDVVWIKHYCILD.....GCLYFYASIR...sTQASGGLYLQGY.SVSEQTHG.....FEQPVIELKpSE.....efKTFYFCAENKTENQRWIAALKTSIK  
PLIEGKLKEQK.vrmkFIKRWQHYFTLAG.....NQLLFQKGGKS...kdPDDPPIELLSKV.QSVKAVAK.....krdrSLPRAFEIFTdSK.....-TYVFKAKDEKNAEWWLQCINVALA  
MKHSGYLWTIG...knVWKRWKRRFFVLVQ...vsqytFAMCSYREKK...AEPQELLQLDGY.TVDYDTPQ.....pglegGRAFFNAVKEGD.....-TVIFASDDEQDRILWVQAMYRATG  
SMVEGSELKKV...rSNSRHYRYFLLDA...dmQSLRWEPSSK...DSEKAKIDIKSI.keVRTGKNT.....dfrsngiseqSEDCAFsviYGEN.....yESLDLVANSADVANIWVTGLRyLIS  
PVKEGPLFIHRkgkplASSSFKKLYSLTT...EALSFAKTSS...skSTFIKLASIRAA.eKVEEKsFG.....SSHIMQVIYaDD.....vgraQTVYLQCKCVNELNQWLSALRKAS  
LVKDGFLLVEVS.....ESSRKLRFHVFLLT...DVLLCAKLKfPdhelEDMKMKISALKS.EIQKEKAN...kqgsraierlkkmfenefllnSPTIPFRIHNRNG.....KSYLFLSSDYERSEWREAIQKQLK  
VMKEGWMVHYT...sKDTLKRKHRYWRDLS...KCITLFQNDT...gSRYKEIPLSEI.ICLEPAKPS.....altPvgATPHCFEITtANv...vyvgenvnpssppnNSVLPsGIGPDVARMWEVAIQHALM  
GTRKGYLSKRS...adNPKWQTKWFALLQ...NLLFYFESDS...sPRPSGLYLLEGS.ICKRAPSP.....krgtsskesgeqqrhsrsRRRNLRRQPtRI...sKTFRLVAlELTGMT--ATLEVSFS  
FLKEGTLMLKS...RKVMQPRMFFLFN...DALLYTPMQ...sgmYKLNMLSLAGM.KVRKPTQE.....AYQNELKIESVER.....SFILSASSAAERDDWLEAISSSIE  
LMQEGTMMRKV...rTKSWKKLRYFRLQN...DGMTVWHGSQ...peSMPKPTFSISDV.eRIRKQGDS.....elIryveefPLEQGFVTVFhGR.....rPNLDLVANSVEEAQIWMRGLQLLVD  
VERCGVLSKWT...nYIHGWQDRWVVLKN...NTLSYKSED...eteYGCRGSICLSKA.VITPHDF...-DECREFDISVnDS.....-VWYLRADQPEHRQWVDAIEQHKt  
LMKLGTVARRG...AMGIWKEFFCELSP...leFRLYSDEE...RTCVCESCLLR.EAVGPAH...-SDGRFELVfSgK...KLALRASSQDEAEDWLDVREALQ  
IQREGALRFMVaaspggGTAQWQKCRLLLR.avagerFRLEFFVPPK...sAPRKVSIPLSAI.eVTRTMPL.....empEKDNTFVLKVeNG.....AEYILETSLQKHSWVADIQGCVD  
AVMEGPLFLQS...qrGTRWRKTWAVLYP.asphgVArLEFFDHKGrggrsRLDCKMIRLAEC.vSVVPVtVE.....sppePGAAAFRLDTaQR.....-SHLLAADAVSSTA-WVQTLCRTAF  
LLKQGEQMSstrirTKLFRFYFLFN...DLLVICRQIP...gdYQVFDsAPRGLL.RVEELEDQ.....gqTLANVFIILRIEN.....addreATYMLKASSQSEMKRWMtSLAPNRR  
VSKKGYLHfLE...pHTAGWAKRFVvVRR...PYAMYNSDK...dTVERFVLNLSA.QVEYSEDQ...qamIKTPNTFAVCTeHR.....-GILLQANSKDMHDWLYAFNPLLA  
LHLEGWMMKVP...nkrGQQWDRKYVILEG...SKVLYDNE...AREAGQRPVEEF.ECLCPDGD...vsihgavagaselantakaDVPYILKMEshPH.....ttcwpgrTYLYLAPSFDPDKQRWVALESVVA  
NRICGLDIED...neNSGFLRRYFILD...qaNCLLWYMDNpqlavGAGAVGSLQLTYI.sKVSIATPK...qkpKTPFCFVINAISQ.....-RYFLQANDQKDLKDWVEALNQASK  
SEKKGFLKKS...dgiRkVWQRRCkAVKN...GILTISHATS...NRQPAKLNLLTC.QVKPNAE...-DKKSFDLISHNR...-TYHFQAEDEQDYIAWISVLTNSKE  
DLSMGDLLLHTpaslgkWKEPELAAFVFKT...AVLVYKDGsYeewdpFRFRHMIPTAL.QVRALPSA...daEANAVCEIvHKS...esegrpeRVFHLCCSSPESRkDFLKSvHSILR  
SVICSFLHYME...kGGKWHKAWFVvPE...nepLVLYYGAPQ...dVKAQRSPLIGF.EVGPPEAG...erpDRRHVFKITQsHL...-SWYFSPETEELQRWMAVLRAGR  
IKQIGWLTEQL...PSGGTAPTALLTE...KELLYCSPsrealSRPRTAPlIAT.RLVHSGPS...kgsvpyDAELSFALRTgTR...hgvDTHLFSVESPQELAAWTRQLVDGCH  
KGLEGVIRKRSfgrdqVCYRWSKRWLvVKD...SFLLYMRPET...galSFVQLFD-PGF.EVQVGKRS...tETRYGVRIDtSHR...-SLILKCSSYRQARWWGQEIETLAQ  
SIKEGILKLKEepskilSGNKFDQRCVLRD...GHLFIYKDPK...sSKHDKMFLRAM.KFYLGVKK...-KMKPpTR.....

LLREGPVLKIS...fRRSDPMERYLVLFN...NMLLYCVPRVlqgvaqFQVTRIDVAGM.KVRELTDA...EFPHSFLVSGKQR...-TLELQARSDEMVSWMQACQAAID  
RGFEGKLTAAQgpeaggLSSRGERRVFLFE...QIIIFSEALGggaqpgYVYKNSIKVSLC.GLEGNLQG...-NPCRFALTsrGP...eggiQRyVLQASDPAVSQAwiKQVAQILE  
LLCHGELKNKS...--GHKLYIFLQ...DILVLRTPVTnerhlyQVYRQPIVQEL.VLEDLQDG...dvrmggsfrgafgnsdKAKNIFRVRfQDP...spgHSHTLQANDVfHKQWfNCIRAAIA  
VKHIAWLAQA.kldgGRQWQRPVLMaVTE...KDLLLYDCMPwtrdawASPCHSYPLVAT.RLVHSGSG...crspslGSDLTFAATRgSR...qgiEMHLFRVETHRDLSTWTRILVQGCH  
VSKKGYLHfKE...pLSSNWAkhfVvVRR...PYVFIYNSDK...dPVERGIINLSA.QVEYSEDQ...qamvKTPNTFAVCTkHR...-GVLLQALNDKDMNDWLYAFNPLLA  
IVKQGYVRIRS...rLGIYQRCVWLVFK.asskgpKRLEKFSDER...aayFRCYHKVELNNV.KNVARLPKS...TKKHAIGYfND...TSKTFACESDLEADEWCKVLQMECV  
VRKAGALVKNkvesaTRRWKWHYVSLKG...CTLFFYETDgsgidhnSVPKHAWVWENS.IVQAPEH...pkKDFVFLSnsLg...DAFLQTTSQTELENWITAIHSACA  
IQRELLSFMGltsgggGQpWQKCRLLLRSegegggSRLEFFVPPK...aSRPRLSIPcSTI.tDVRTATAL...empDRENTFVVKVeGP...SEYILETSALHVKAwwSDIQECLs  
PELADYIKVFK.pkkITLKGyQYwCTFKD...TSISCYKsKE...essGTPAHQMNLRGC.EVTPDVNI...sGQKFNIKLLIPVA...egmNEIWLRCdNEKQYAHWMAACRLASK  
PIVEGALYLKE...dGKKSwwKRRYFLRA...SGIYVYPKG.kttsRDLACFIQFENV.NIYYGIQC...kmkykaPTDHCfVlKHqQl...qkesqYIKYLCDDARTLSQWwMGIRIAKY  
CIVHGYMSKMG...npFLTQWQRFFYFLP...NRLewRGEg...EAPQSLTMEI.QSVEETQI...KERKCLLIRg...KQFVLQCDSDPELVQWKKELRDAYR  
AQMEGFLNRKHahnkkaSSRSWHNVYCVINN...QEMGFYKDAkaasgipYHSEVPVSLKEA.ICEVALDY...kKKKHVFKLRLsDG...NEYLFQAKDDEEMNTWIAISSAIS  
FLHSGKLYKAK...--SNKELYGFLFN...DFLLLTQITKksnlqyKMYKTIPIFLNEV.LVKLPTDP...sGDEPIFHISHIDR...-VYTLRAESINERTAWVQKIKAAESE  
DTRKHGMKFRlIlgIPSGGFHDHYFILNS...SCLRLYKEVR...sHRPEKEWpVKS.LKVYLGvKK...klrpPTCWGFTVvHeTe...khekQWYLCCDTQMELEWfATFLSVQH  
FIRGLSskLs...GKGLQQRMFLLFN...DVLLYTSRGL.tasngFKVHGQLSLPYGM.TIEESEEE...wGVPHCLTLRgRg...-SIIVAASSRSEMEKwMEDIQMAID  
VRKAGWLFfKPrklelvARRKWKQYwVTLG...CTLLFYETYGnsteqnSAPRCALFAEDS.IVQSVPEH...pkKEHVFLSnsCG...DVYLFQATSQTDLNwVTAIHSACA  
KGLEGMIMKRSscghrACYRWSKRWLIVKD...SFLLYMkPDS...GAIAFVLLVDKE.fRVKvGRKE...tETKYGLRIDNISR...-TLILKCNsYRHARWWGGAIEEFIR

IRHLGWLAEKV...pgeSEKQWKPALVVLTE.....KDLLIYDSMPrrkeawFSPVHSYPLLAT..RLVHSGPG.....kgsqqaGMDLSFATRtGTK.....qgiETHLFRAEISRDLShWTRsIVQGCH  
GTRKGFSLKKA....aEASRWHEKWFALYQ.....NVLFYFEGEQ....sGRPAGMYLLEGC..SCERTPAP.....prtnagpagardaIDKQYYFTVLFgHD.....gqKPLELRCEEEQAGKEWMEAIHQASY  
FIRQGSLIQVPvrigsISLKKEGERQCFLFT.....KHFLICTRSsggkhlIKTGvVLSLIQC..TLIEEPDG.....sdddpkgsghmfghLDFKIVVEPpDA.....asFTVVLLAPSRQEKAAWMSDISQCVD  
VTYMSQVTIQC....aGSEEKNERYLLLFP.....NLLLMLSASP..rmsgFIYQGKLPTTGM..TITKLEDS.....eNHRNAFEISGSmI.....ERILVSCTSQQDLHEWVEHLQKQTK  
VIMADSLKIRG.....TLKSWTKLWCvLKP.....GVLIIYKTPK.....vGQVWGTvLLHCC..ELIERPSK.....KDGFCFLFHpLDwawkgpkgesvgsitqplsSYLIFRAASESDGRCWLDLALALR  
LILQDAFQVWD...pksLIRKGRERHLFLFE.....ISLVFSKEIKssgthkVYVKNKLLTSEL..GVTEHVEG.....-DPCKFALWSgRT.....pssdNKTvLKASNIETKQEWIKNIREVIQ  
GTRKGYLSKRS....aDNPKWQTKWFALLQ.....NLLFYFESDS....sPRPSGLYLLEGS..ICKRAPSP.....krgtsskesgeKQqHYFTVNFsND.....sqKTELELRTEDAKDCDEWVAIARASY  
YYKERLLYLEeChgelKNNRGVklHVFLFQ.....EVLVITRAVtneqlyQLYRQPIVpKDL..TLEDLQDG.....evrfgslrgafsnneRVKNFFRVsFkNG.....sqsQTHSLQANDTFNKQQWLNcIRQAKE  
SRIEGWSLVPN...rgniKRYGWKKQYVVVSS.....KKILFYNDEQ..dkeqSNPSPMVLIDIKL.fHVRPVTQG.....dvyaeteEIPKIFQILYaNE.....gecrKDVEMEPVQQAekt---NFQNHKG  
LIKEGHILKLS....aKNGTTQDRYLILFN.....DRLLYCVPRlrlgqkFSVRARIDVDGM..ELKESSNL.....NMPRTFLVSGkQR.....-SLELQARTEEEKDWVQAINSTLL  
LIKEGHILKLS....aKNGTTQDRYLILFN.....DRLLYCVPRlrlgqkFSVRARIDVDGM..ELKESSNL.....NMPRTFLVSGkQR.....-SLELQARTEEEKDWVQAINSTLL  
PEIHGFLHAKE....qGKKSWKkAYFFLRR.....SGLYFSTKGT....sKEPRHLQLFSEF.sTSHVYMSL.....agkkkghaPTYGFCLKpNKA.....ggprDLKMLCAEEEQSRTCWvTAIRLLKD  
LIKEGSIQKLS....aKNGTTQDRHLFLFN.....NVMLYCVPKLrimgqkLSVREKMDISDL..QVQDIVKP.....NAACTFIITGrKR.....-SLELQTRTEEEKKEWIVQIATVE  
GHRKGATKMKD....fARFKPMQRHLFLYE.....KAVMFCKRRFadrypsYSFKHCLKMEDV..GITEHVKG.....-DNRKFEIRYsEK.....eEIYVQAPNVdVKMLWLKEIRKILV  
LLHSGKLYKTK....--SNKELHAFLFN.....DFLLLTYLVRkssaqrIRMYKTIPIFLNEV..LVKLPTDP.....sSEDPVFHISHiDR.....-VYTLRTDNINERTAWVQKIKGASE  
LVRDGSVFLKS....TTGRLKEVQAVLLT.....DILVFLQEKDyvfasiDHKSTVISLKKL..IVREVAHE.....-EKGLFLISMgVK.....dpEMVEVHASSREERNsWIIQIDTIN  
LIHEGCLLWKT....ATGRFKDVLVLLMT.....DVLVFLQEKDyifitsLDKPSVVSLLQNL..IVRDIANQ.....-AKGMFLISSgPP.....EMYEVAHASRDRRTTWIRVQQSVR  
LHLEGMLCWKT....TSGRLKDILAILLT.....DVLLLLQEKDyvfasiVDSKPPVISLQKL..IVREVANE.....-EKAMFLISAsLQ.....gpEMYEIYTSSKEDRNawMAHIQRAVE  
LLMQGSFSVWtkvkeIARFKPMQRHLFLHE.....KAVLFCKKREyepasYSYKQSLNMTAV..GITENVKG.....-DTKKFEIwYnAR.....eEVYIIQAPTPEIKAAWVNEIRKvLT  
PEIQGFLLQLRG.sgrgsGRKLWKRFFCFLRR.....SGLYYSTKGT....skdpRHLQYVADVNES..NVYVVTQG.....rklygmPTDFGFCVKPnKL.....rghkGLHIFCSEDEQSRTCWLAARFLFKY  
FVRQGSMLMQMSgrigsISTKKEGERQCFLFS.....KHLICTRGS.ggkhlTKNGVISLIDC..TLLDEPEN.....lddeakgagpeIEHLEFKIGVePK.....dspFTVILVASTRQEKAAWTSdIIQCVD  
LLHDGLVYWKT....ATGRFKDILALLT.....DVLLFLQEKDyifaavDQKPSVISLQKL..IAREVANE.....-ERGMFLISAsSA.....gpEMYEIHTNSKEERNNWMRRIQQAVE  
PQGDGEIRITT....IDKHTKRERHIFLFD.....LAVIVCKRKG...dnYEMKEIIDLQOY..KIANNPTT.....dkenkKWSYGFYLIHQG.....qNGLEFYCKTKDLKKKwLEQFEMALS  
PEIQGFLLQVKE....vGRKSWKKLYVCLRR.....SGLYYSTKGT....skepRHLQLLADLEES..SIFYLIAG.....kkqynaPNEHGMCiKpNKA.....ktemkELRLLCAEDEQIRTCWMTAFRLLYK  
PKIDGELKvRS....iVNHTKQDRYLFLFD.....KVIVCKRKG...ysYELKEVIELLFH..KMTDDPMH.....nkdikKWSYGFYLIHQG.....kQGFQFFCKTEDMKRkWMEQFEMAMS  
PKIDGELKITS....VERRSKTDryaFLLD.....KALLICKRRG...dsYDLKASVNLHSF..QVRDDSSG.....erdnkKWSHMFLlIEdQG.....aQGYELFFKTRELKKWMEQFEMAIS  
PKIDGELKvRS....iVNHTKQDRYLFLFD.....KVIVCKRKG...ysYELKEVIELLFH..KMTDDPMH.....nkdikKWSYGFYLIHQG.....kQGFQFFCKTEDMKRkWMEQFEMAMS  
FIMEGTLTRVG....--AKHERHIFLFD.....GLMICCKSNHgassaeYRLKEKFFMRKV..QINDKDDT.....sEYKHAfEiILkDG.....NSVIFSAKSAAEKNWMAALISLQY  
FIMEGPLTRIG....--AKHERHIFLFD.....GLMISCKPNHgyssaeYRLKEKfVMRKI..QICDKEDA.....ceYRHAFELVSKDE.....NSVIFAAKSAEKNWMAALISLHY

|     |         |          |             |          |          |    |          |
|-----|---------|----------|-------------|----------|----------|----|----------|
| 111 | T_Mouse | PSCD3-PF | MouseDorr T | 100.6262 | 31.89749 | 12 | 13.98169 |
| 112 | T_Mouse | PSCD2-PF | MouseDorr T | 99.94955 | 29.71226 | 12 | 13.98169 |
| 113 | T_Mouse | PSCD1-PF | MouseDorr T | 98.12305 | 29.71226 | 12 | 13.98169 |
| 127 | T_Mouse | AKT3-PH1 | MouseDorr T | 66.54652 | 31.89749 | 8  | 14.12436 |
| 128 | T_Mouse | AKT2-PH1 | MouseDorr T | 64.85858 | 21.37874 | 8  | 12.92688 |
| 129 | T_Mouse | AKT1-PH1 | MouseDorr T | 64.60328 | 21.37874 | 9  | 12.92688 |
| 20  | T_Mouse | RASA2-PF | MouseDorr T | 60.19405 | 11.85552 | 12 | 7.197588 |
| 7   | T_Mouse | TEC-PH1  | MouseDorr T | 58.45845 | 27.78836 | 12 | 13.94467 |
| 120 | T_Mouse | BTK-PH1  | MouseDorr T | 57.54618 | 27.78836 | 13 | 13.54181 |
| 19  | T_Mouse | RASA3-PF | MouseDorr T | 55.79247 | 18.5865  | 12 | 9.697588 |
| 87  | T_Mouse | ITK-PH1  | MouseDorr T | 54.58805 | 20.97401 | 12 | 12.25406 |
| 96  | T_Mouse | GAB1-PH1 | MouseDorr T | 50.05182 | 11.87752 | 13 | 7.376668 |
| 95  | T_Mouse | GAB2-PH1 | MouseDorr T | 44.3796  | 12.80969 | 13 | 7.782133 |
| 67  | T_Mouse | PLEKHA1- | MouseDorr T | 40.79698 | 19.45923 | 9  | 10.69288 |
| 65  | T_Mouse | PLEKHA2- | MouseDorr T | 38.37364 | 16.14802 | 10 | 8.74665  |
| 110 | T_Mouse | DAPP1-PF | MouseDorr T | 36.9857  | 20.497   | 7  | 11.77316 |
| 69  | T_Mouse | PHLDB1-P | MouseDorr T | 36.41728 | 20.54062 | 10 | 12.15971 |
| 131 | T_Mouse | SH3BP2-P | MouseDorr T | 34.53185 | 10.93954 | 8  | 6.1609   |
| 54  | T_Mouse | PLEK2-PH | MouseDorr T | 33.76889 | 22.15875 | 9  | 13.45775 |
| 55  | T_Mouse | PLEK2-PH | MouseDorr T | 31.67357 | 15.10798 | 8  | 8.577063 |
| 70  | T_Mouse | PDPK1-PF | MouseDorr T | 28.13585 | 6.732081 | 9  | 4.815186 |
| 73  | T_Mouse | MYO10-PF | MouseDorr T | 25.53585 | 16.46003 | 10 | 8.837797 |
| 26  | T_Mouse | OSBPL3-P | MouseDorr T | 24.61724 | 8.015123 | 10 | 5.302999 |
| 115 | T_Mouse | CNKS2-F  | MouseDorr T | 23.52208 | 3.053269 | 9  | 3.093661 |
| 48  | T_Mouse | OSBPL7-P | MouseDorr T | 23.39965 | 6.649137 | 10 | 4.749225 |
| 56  | T_Mouse | PLEK-PH1 | MouseDorr T | 22.62968 | 14.41739 | 7  | 8.408871 |
| 68  | T_Mouse | PHLPP-PF | MouseDorr T | 20.18313 | 9.461556 | 8  | 5.959526 |
| 97  | T_Mouse | FGD6-PH2 | MouseDorr T | 19.13196 | 12.27738 | 5  | 7.560051 |
| 88  | T_Mouse | IRS1-PH1 | MouseDorr P | 4.52796  | 3.491613 | 10 | 3.321827 |
| 31  | T_Mouse | DGKD-PH  | MouseDorr P | 3.390404 | 1.764742 | 9  | 2.473069 |
| 24  | T_Mouse | 2610034M | MouseDorr P | 1.654989 | 9.397778 | 12 | 5.865881 |
| 51  | T_Mouse | PSD3-PH1 | MouseDorr P | -2.20621 | -14.6482 | 12 | -7.10921 |
| 79  | T_Mouse | M-RIP-PH | MouseDorr P | -3.45277 | -5.74347 | 6  | -2.05755 |
| 63  | T_Mouse | PLEKHB1- | MouseDorr P | -7.11446 | -2.56218 | 7  | -0.20638 |
| 27  | T_Mouse | RALGPS2- | MouseDorr P | -8.02542 | -11.9821 | 13 | -5.77365 |
| 107 | T_Mouse | DOK4-PH1 | MouseDorr P | -8.24788 | -17.0933 | 9  | -8.68325 |
| 60  | T_Mouse | PLEKHF1- | MouseDorr P | -8.77847 | 6.761305 | 11 | 4.96691  |
| 38  | T_Mouse | AFAP-PH1 | MouseDorr P | -8.81854 | -8.27346 | 7  | -3.42332 |
| 53  | T_Mouse | PLCD1-PH | MouseDorr P | -9.26913 | -0.86444 | 9  | 0.556861 |
| 25  | T_Mouse | 2610034M | MouseDorr P | -9.55625 | -18.6114 | 3  | -9.46285 |
| 22  | T_Mouse | VEPH1-PF | MouseDorr P | -10.589  | -0.91382 | 11 | 0.55365  |
| 42  | T_Mouse | PLCL2-PH | MouseDorr P | -11.9024 | -8.1226  | 9  | -3.38032 |
| 126 | T_Mouse | SH2B2-PH | MouseDorr P | -14.9566 | -11.1846 | 4  | -5.33384 |
| 108 | T_Mouse | DOK1-PH1 | MouseDorr P | -15.3327 | -17.0358 | 12 | -8.61398 |
| 109 | T_Mouse | DDEF1-PF | MouseDorr P | -17.3438 | -2.47524 | 9  | -0.17146 |
| 45  | T_Mouse | GEFT-PH1 | MouseDorr P | -18.6789 | -6.08618 | 6  | -2.25916 |
| 106 | T_Mouse | DOK5-PH1 | MouseDorr P | -19.2796 | -18.3878 | 8  | -9.27135 |
| 125 | T_Mouse | ADRPK1-F | MouseDorr P | -21.2903 | 1.49895  | 4  | 2.206273 |
| 10  | T_Mouse | SPNB2-PF | MouseDorr P | -22.6344 | -9.85365 | 7  | -4.40766 |
| 52  | T_Mouse | MCF2-PH1 | MouseDorr P | -32.9825 | -16.3673 | 11 | -8.49827 |
| 32  | T_Mouse | ARFGEF1  | MouseDorr P | -35.0323 | -25.5585 | 5  | -14.5978 |

|             |                       |          |          |    |          |
|-------------|-----------------------|----------|----------|----|----------|
| 57 T_Mouse  | PLEK-PH2 MouseDorr C  | 16.98692 | 19.24822 | 6  | 10.11167 |
| 21 T_Mouse  | PLEKHO1- MouseDorr C  | 5.64373  | 1.620825 | 8  | 2.216154 |
| 74 T_Mouse  | MYO10-Pf MouseDorr C  | 4.739982 | 9.167004 | 12 | 5.56816  |
| 62 T_Mouse  | PLEKHB2- MouseDorr C  | 4.527408 | 1.331255 | 8  | 2.139154 |
| 36 T_Mouse  | SKAP2-PH MouseDorr C  | 4.342004 | -4.3906  | 11 | -1.52465 |
| 28 T_Mouse  | PLEKHA5- MouseDorr C  | 3.518519 | 10.20971 | 8  | 6.0546   |
| 8 T_Mouse   | TRIOBP-P MouseDorr C  | 3.319646 | -1.76073 | 3  | 0.049064 |
| 18 T_Mouse  | RASAL1-P MouseDorr C  | 2.8033   | 1.427833 | 8  | 2.190496 |
| 80 T_Mouse  | M-RIP-PH1 MouseDorr C | 0.569569 | 0.00855  | 4  | 1.113177 |
| 44 T_Mouse  | PLEKHM2- MouseDorr C  | 0.157531 | -1.18346 | 5  | 0.40386  |
| 30 T_Mouse  | PSD2-PH1 MouseDorr C  | -2.22542 | -19.2232 | 14 | -9.60921 |
| 39 T_Mouse  | CENTD2-F MouseDorr C  | -2.29737 | -10.0165 | 10 | -4.6648  |
| 37 T_Mouse  | CENTB5-F MouseDorr C  | -4.26434 | 6.459244 | 9  | 4.733255 |
| 104 T_Mouse | DNM2-PH1 MouseDorr C  | -4.66261 | -11.2473 | 9  | -5.35131 |
| 9 T_Mouse   | SWAP70-F MouseDorr C  | -4.98782 | 11.39746 | 10 | 6.808048 |
| 29 T_Mouse  | ARHGAP1 MouseDorr C   | -5.10301 | -10.5789 | 6  | -5.07223 |
| 105 T_Mouse | DNM1-PH1 MouseDorr C  | -5.44484 | -11.2473 | 9  | -5.35131 |
| 76 T_Mouse  | OPHN1-Pf MouseDorr C  | -6.63977 | -10.5806 | 5  | -5.07223 |
| 23 T_Mouse  | PLEKHJ1-I MouseDorr C | -7.88884 | 5.047737 | 9  | 4.256374 |
| 34 T_Mouse  | FARP1-PH MouseDorr C  | -8.19076 | -9.49061 | 5  | -4.27736 |
| 116 T_Mouse | CENTD1-F MouseDorr C  | -8.69454 | -5.52161 | 6  | -1.99241 |
| 64 T_Mouse  | PLEKHA3- MouseDorr C  | -9.11254 | -1.18346 | 5  | 0.396189 |
| 118 T_Mouse | CADPS-Pf MouseDorr C  | -11.3893 | 3.959244 | 9  | 3.542885 |
| 50 T_Mouse  | RASA4-Pf MouseDorr C  | -11.9261 | -10.9678 | 10 | -5.25627 |
| 41 T_Mouse  | ABR-PH1 MouseDorr C   | -12.4433 | -2.26368 | 9  | -0.05698 |
| 82 T_Mouse  | PRKCM-PI MouseDorr C  | -12.7959 | -1.27641 | 6  | 0.250509 |
| 93 T_Mouse  | RASGRF1 MouseDorr C   | -13.0423 | -5.41003 | 6  | -1.96591 |
| 98 T_Mouse  | FGD6-PH1 MouseDorr C  | -14.0154 | -0.27131 | 6  | 1.055298 |
| 35 T_Mouse  | PLCD4-PH MouseDorr C  | -14.3543 | -14.5273 | 10 | -7.08666 |
| 119 T_Mouse | COL4ABP1 MouseDorr C  | -14.3874 | -6.3498  | 4  | -2.33589 |
| 43 T_Mouse  | PLEKHM1- MouseDorr C  | -14.8386 | -13.9517 | 6  | -6.84987 |
| 78 T_Mouse  | NGEF-PH1 MouseDorr C  | -15.6602 | -17.585  | 8  | -8.70421 |
| 84 T_Mouse  | KIF1A-PH1 MouseDorr C | -16.0109 | -10.1593 | 5  | -4.7058  |
| 114 T_Mouse | CIT-PH1 MouseDorr C   | -16.2152 | -12.4441 | 8  | -5.88761 |
| 66 T_Mouse  | PLEKHA2- MouseDorr C  | -16.5443 | -7.60173 | 4  | -2.91949 |
| 6 T_Mouse   | TIAM1-PH1 MouseDorr C | -17.3668 | -7.37381 | 8  | -2.76331 |
| 100 T_Mouse | FGD1-PH2 MouseDorr C  | -17.7219 | -3.82106 | 5  | -1.21869 |
| 15 T_Mouse  | SNTA1-PH MouseDorr C  | -17.911  | -9.89788 | 4  | -4.43429 |
| 58 T_Mouse  | PLD2-PH1 MouseDorr C  | -18.1026 | -2.71999 | 8  | -0.35948 |
| 117 T_Mouse | CENTD1-F MouseDorr C  | -18.2504 | -22.2886 | 9  | -11.301  |
| 101 T_Mouse | FGD2-PH1 MouseDorr C  | -18.6759 | -4.16068 | 8  | -1.37216 |
| 121 T_Mouse | NET1-PH1 MouseDorr C  | -18.8253 | -8.83715 | 5  | -3.83069 |
| 13 T_Mouse  | SNTB2-PH MouseDorr C  | -18.991  | 1.375319 | 5  | 2.151071 |
| 83 T_Mouse  | KIF1B-PH1 MouseDorr C | -19.2249 | -3.14081 | 5  | -0.78088 |
| 5 T_Mouse   | TIAM1-PH MouseDorr C  | -19.4766 | -3.34446 | 8  | -0.87617 |
| 77 T_Mouse  | SH2B1-PH MouseDorr C  | -19.906  | -3.93396 | 4  | -1.30817 |
| 61 T_Mouse  | PLEKHC1- MouseDorr C  | -20.6828 | -11.5125 | 7  | -5.53548 |
| 130 T_Mouse | APBB1IP-f MouseDorr C | -21.2817 | -5.83346 | 12 | -2.10495 |
| 86 T_Mouse  | ITSN1-PH1 MouseDorr C | -22.8564 | -1.32801 | 8  | 0.246029 |
| 40 T_Mouse  | CENTD2-F MouseDorr C  | -23.9611 | -16.9155 | 8  | -8.5378  |
| 33 T_Mouse  | FARP1-PH MouseDorr C  | -24.3282 | -2.90864 | 5  | -0.61868 |

|     |         |                   |                     |          |          |    |          |
|-----|---------|-------------------|---------------------|----------|----------|----|----------|
| 47  | T_Mouse | TIAM2-PH          | MouseDorr C         | -24.539  | -3.34446 | 8  | -0.87617 |
| 59  | T_Mouse | PLD1-PH1          | MouseDorr C         | -25.4941 | -11.3197 | 8  | -5.35948 |
| 14  | T_Mouse | SNTB1-PH          | MouseDorr C         | -25.603  | 7.502175 | 7  | 5.186903 |
| 71  | T_Mouse | RASGRF2           | MouseDorr C         | -25.9121 | -2.41792 | 6  | -0.1335  |
| 72  | T_Mouse | RASGRF2           | MouseDorr C         | -27.2194 | -1.0896  | 7  | 0.413275 |
| 122 | T_Mouse | ARHGEF7           | MouseDorr C         | -28.864  | -19.7666 | 5  | -10.1688 |
| 75  | T_Mouse | OSBPL5-P          | MouseDorr C         | -29.0949 | -12.0358 | 7  | -5.79644 |
| 46  | T_Mouse | KALRN-PF          | MouseDorr C         | -29.4503 | -8.56954 | 11 | -3.54998 |
| 94  | T_Mouse | RASGRF1           | MouseDorr C         | -30.2578 | -5.41906 | 6  | -1.96591 |
| 123 | T_Mouse | ARHGEF3           | MouseDorr C         | -30.662  | -22.7438 | 5  | -11.4701 |
| 16  | T_Mouse | ROCK1-PF          | MouseDorr C         | -30.837  | -2.58497 | 8  | -0.21445 |
| 102 | T_Mouse | FGD1-PH1          | MouseDorr C         | -31.5606 | -18.7438 | 9  | -9.5071  |
| 103 | T_Mouse | FGD1-PH1          | MouseDorr C         | -31.5606 | -18.8818 | 9  | -9.5071  |
| 90  | T_Mouse | GRB14-PF          | MouseDorr C         | -32.4657 | -3.31577 | 10 | -0.86845 |
| 99  | T_Mouse | FGD3-PH1          | MouseDorr C         | -32.8666 | -22.7438 | 9  | -11.9086 |
| 85  | T_Mouse | ITSN2-PH          | MouseDorr C         | -33.023  | -9.37175 | 8  | -4.2002  |
| 49  | T_Mouse | AKAP13-P          | MouseDorr C         | -34.5638 | -26.5001 | 6  | -15.7542 |
| 124 | T_Mouse | ARHGEF2           | MouseDorr C         | -34.9632 | -25.5585 | 6  | -14.468  |
| 81  | T_Mouse | MCF21-PF          | MouseDorr C         | -35.4329 | -16.3673 | 11 | -8.49827 |
| 89  | T_Mouse | GRB7-PH1          | MouseDorr C         | -36.6746 | -3.03616 | 11 | -0.7078  |
| 92  | T_Mouse | RASGRF1           | MouseDorr C         | -38.5344 | -11.3442 | 8  | -5.36364 |
| 17  | T_Mouse | RGNEF-PF          | MouseDorr C         | -39.3173 | -26.8893 | 5  | -15.8354 |
| 1   | T_Mouse | VAV3-PH1          | MouseDorr C         | -40.8317 | -19.4713 | 8  | -9.74982 |
| 91  | T_Mouse | GRB10-PF          | MouseDorr C         | -42.0324 | -4.94031 | 11 | -1.79368 |
| 2   | T_Mouse | VAV2-PH1          | MouseDorr C         | -42.0733 | -23.6387 | 8  | -12.6939 |
| 4   | T_Mouse | VAV1-PH1          | MouseDorr C         | -43.5485 | -24.7061 | 8  | -13.2411 |
| 3   | T_Mouse | VAV2-PH1          | MouseDorr C         | -43.9299 | -23.6646 | 8  | -12.6939 |
| 12  | T_Mouse | SOS1-PH1          | MouseDorr C         | -46.556  | -11.8582 | 7  | -5.70905 |
| 11  | T_Mouse | SOS2-PH1          | MouseDorr C         | -48.4066 | -11.7303 | 7  | -5.70905 |
| 640 | Pombe   | SPCp054-INP_58807 | 805..898            | -17.5762 | -6.51671 | 7  | -2.41889 |
| 643 | Pombe   | SPCC4B3           | CAB60689 805..898   | -17.5762 | -6.53239 | 7  | -2.41889 |
| 630 | Pombe   | reserved_r        | NP_59415:722..835   | 7.893253 | -3.22634 | 4  | -0.79655 |
| 649 | Pombe   | SPAC26A           | CAA93232 722..835   | 7.893253 | -3.22718 | 4  | -0.79655 |
| 635 | Pombe   | pob1-PH1          | NP_59682:701..806   | 7.048854 | 1.018837 | 8  | 1.776369 |
| 646 | Pombe   | SPBC1289          | CAB38684 701..806   | 7.048854 | 1.018837 | 8  | 1.776369 |
| 625 | Pombe   | SPAC11E           | NP_59493:683..806   | -2.46639 | -15.5111 | 8  | -7.79537 |
| 627 | Pombe   | SPAPYUG           | NP_59470:584..684   | 7.412722 | 7.1358   | 6  | 5.127005 |
| 629 | Pombe   | SPAC26A           | NP_59415:529..630   | 12.57498 | 4.027303 | 6  | 3.57941  |
| 636 | Pombe   | csx2-PH1          | NP_59589:513..612   | 7.65289  | -3.22718 | 5  | -0.82185 |
| 644 | Pombe   | SPBC17G           | CAB52806 513..612   | 7.65289  | -3.27945 | 5  | -0.82185 |
| 633 | Pombe   | SPAC2F7           | NP_59298:394..510   | -10.1586 | -10.5237 | 5  | -5.06541 |
| 628 | Pombe   | SPAC637           | NP_59463:303..403   | -6.77305 | 0.802741 | 10 | 1.576495 |
| 632 | Pombe   | SPAC19A           | NP_59379:292..388   | -2.9067  | 0.074765 | 6  | 1.187213 |
| 641 | Pombe   | SPCPB16           | NP_58802:28..106    | 2.663912 | -6.83352 | 6  | -2.4654  |
| 634 | Pombe   | SPAC1F5           | NP_59286:26..122    | -1.17018 | -7.78566 | 8  | -3.09871 |
| 637 | Pombe   | SPBC2F12          | NP_59571:257..340   | 6.474466 | -2.71999 | 7  | -0.34772 |
| 642 | Pombe   | SPCPB16           | NP_58802:225..317   | -10.373  | -4.38599 | 6  | -1.49608 |
| 626 | Pombe   | plc1-PH1          | NP_59473:161..271   | -4.45531 | -6.19282 | 12 | -2.26644 |
| 645 | Pombe   | SPAC22F           | CAB52721 161..271   | -4.45531 | -6.19282 | 12 | -2.26644 |
| 624 | Pombe   | SPAC23H           | NP_59340:152..241   | -9.85844 | 1.698744 | 10 | 2.37737  |
| 631 | Pombe   | SPAC6G9           | NP_59411:1053..1154 | 5.617807 | -8.73754 | 9  | -3.69463 |

|     |            |                              |          |          |    |          |
|-----|------------|------------------------------|----------|----------|----|----------|
| 623 | Pombe      | SPAC23H: NP_001011<707..768  | -0.09846 | -0.53616 | 3  | 0.863051 |
| 639 | Pombe      | ksg1-PH1 NP_58844:<495..570  | 3.00558  | 1.622565 | 10 | 2.269642 |
| 647 | Pombe      | SPCC576. CAA21194 <495..570  | 3.00558  | 1.622565 | 10 | 2.269642 |
| 648 | Pombe      | SPAC19A: CAB16232 <285..346  | -0.09846 | -0.53754 | 3  | 0.863051 |
| 638 | Pombe      | SPBC428. (NP_59518:<194..256 | -11.1684 | -12.0319 | 2  | -5.77692 |
| 476 | Cerevisiae | SPO71-PH NP_01038:980..1279  | -6.14986 | -2.89494 | 9  | -0.55377 |
| 458 | Cerevisiae | CAF120-PINP_01412:92..204    | -16.1067 | -13.4099 | 10 | -6.48231 |
| 469 | Cerevisiae | BOI1-PH1 NP_00946:779..893   | 10.4628  | 2.78708  | 9  | 3.008196 |
| 466 | Cerevisiae | BOI2-PH1 NP_01103:771..882   | 8.834833 | 8.614634 | 9  | 5.508196 |
| 475 | Cerevisiae | TUS1-PH1 NP_01352:665..927   | 5.529107 | 4.327729 | 6  | 3.907399 |
| 459 | Cerevisiae | CLA4-PH1 NP_01410:64..174    | 0.312161 | -10.2053 | 9  | -4.83293 |
| 453 | Cerevisiae | BEM3-PH1 NP_01521:637..738   | -9.25796 | -3.53138 | 9  | -0.89677 |
| 462 | Cerevisiae | SPO14-PH NP_01295:498..660   | -2.15045 | -0.08083 | 7  | 1.104243 |
| 470 | Cerevisiae | CDC24-PH NP_00935:479..668   | 0.076673 | -5.05214 | 6  | -1.83974 |
| 463 | Cerevisiae | SLM1-PH1 NP_01216:471..577   | 9.280117 | -3.27945 | 11 | -0.82431 |
| 474 | Cerevisiae | ASK10-PH NP_01161:465..725   | 8.286208 | 4.855292 | 5  | 4.124394 |
| 456 | Cerevisiae | SLM2-PH1 NP_01435:448..553   | 19.74367 | 2.080356 | 9  | 2.64987  |
| 471 | Cerevisiae | YEL1-PH1 NP_00949:412..551   | -5.46683 | 0.039599 | 6  | 1.15546  |
| 455 | Cerevisiae | SKM1-PH1 NP_01452:4..113     | -2.42455 | -10.1684 | 8  | -4.83293 |
| 457 | Cerevisiae | SIP3-PH1 NP_01414:312..421   | -21.3193 | -10.9527 | 9  | -5.24737 |
| 464 | Cerevisiae | YSP1-PH1 NP_01202:311..421   | -8.54804 | -7.30928 | 8  | -2.74737 |
| 467 | Cerevisiae | OSH2-PH1 NP_01026:292..384   | -1.25668 | -5.72842 | 8  | -2.05571 |
| 451 | Cerevisiae | SWH1-PH NP_00942:284..377    | 4.743527 | -5.72634 | 6  | -2.05571 |
| 477 | Cerevisiae | NUM1-PH NP_01043:2523..3733  | -10.2825 | -1.45702 | 7  | 0.224625 |
| 460 | Cerevisiae | ATG26-PH NP_01329:241..333   | 4.977611 | -14.3826 | 4  | -6.95603 |
| 465 | Cerevisiae | OSH3-PH1 NP_01194:224..313   | 16.08234 | 4.518779 | 10 | 3.971304 |
| 468 | Cerevisiae | OPY1-PH1 NP_00968:218..315   | 8.069497 | -5.67588 | 14 | -2.01846 |
| 472 | Cerevisiae | YHR131C- NP_01199:194..306   | 0.482412 | 0.741968 | 6  | 1.569998 |
| 473 | Cerevisiae | BEM2-PH1 NP_01108:1846..1948 | -20.8417 | -10.2164 | 2  | -4.94481 |
| 452 | Cerevisiae | BUD4-PH1 NP_01262:1306..1412 | 9.501388 | -0.39628 | 7  | 0.9957   |
| 461 | Cerevisiae | SKG3-PH1 NP_01328:103..217   | -22.5339 | -13.0126 | 8  | -6.25892 |
| 454 | Cerevisiae | PLC1-PH1 NP_01505:<128..213  | -1.36843 | -12.4441 | 9  | -5.83276 |

6 PDREGWLLKLG....gRVKTKWRRWFILTD.....NCLYYFEYTT....dKEPRGIIPLENL..SIRE'  
6 PDREGWLLKLG....ggRVKTKWRRWFILTD.....NCLYYFEYTT....dKEPRGIIPLENL..SIRE  
6 PDREGWLLKLG....ggRVKTKWRRWFILTD.....NCLYYFEYTT....dKEPRGTIIPLENL..SIRI  
5 IVKEGWVQKRG....eYIKNWRPRYFLLKT.....dGSFIGYKEKP.qdvdIPYPLNNFSVAKC..QI  
5 VIKEGWLHKRG....eYIKTWRPRYFLLKS.....dGSFIGHKERPeapdqLPLNNFSVAEC..QI  
5 IVKEGWLHKRG....eYIKTWRPRYFLLKN.....dGTFIGYKERPqdvdaqRESPLNNFSVAQC..Q  
9 HLKEGEMYKRAqgrtriGKKNFKKRWFLCTS.....RELTYHRQQG.....KDAIYTIPVKNI.IAVEI  
7 TIL EEILIKRSqqkkktSPLNYKERLFLVTK.....SVLSY YEGRA....ekKYRKGVIDISKI..KCVEI  
8 VILESIFLKR SqqkkktSPLNFKKRLFLTV.....HKLSY YEDF.ergrrGSKKGSIDVEKI..TCVE'  
9 LLKEGFMIKRAqgrkrfGMKNFKKRWFLTN.....HEFTYQKSKG.....DQPLCNIPIENI.IAVEI  
7 ILLEEQLIKKSqqkrrtSPSNFKVRFVFLTK.....ASLAYFEDRH...gkkRTLKGSIELSRI..KCVEI  
8 VVCSGWLRKSP.pekkIKRYAWKRRWFVLR SgrltgdpDVLEY YKNDH.....aKKPIRIIDLNL C.q  
8 VVCTGWLRKSP.pekkIRRYAWKRRWFILRSgrmsgdpDVLEY YKNEH.....sKKPLRIINLNL C.  
5 VIKAGYCVKQG....aVMKNWKRRYFQLDE.....NTIGYFKSEL.....eKEPLRVIPLKEV.hKVQ  
6 LIKSGYCVKQG....nVRKSWKRRFFALDD.....FTICYFKCEQ....dREPLRTIPLKDVikTHEC  
4 GTKEGYLTKQG....gLVKTKWTRWFTLQR.....NELKYFKDQ-.....-MSPEPIRIDL.tECSA'  
6 KVCRGYLIKMG....gKIKSWKKRWVFDL.....IKRTLSY YVDKH.....eTKLKGVIYFQAI.eEY  
4 VAKAGYLHKKG..gtqIQLLKWPLRFVIIHK.....RCIY YFKSST....sASPQGA FSLSGY.nRVM  
4 VLKEGFLVKRG....hIVHNWKARWFILRQ.....NTLLY YKLEG..grrvTPPKGRIVLDGC..TITC  
6 VVKQGYLSKQG....hKRKNWKVRRFVLRK....dpAFLHY YDPSK...eeNRPVGGFSLRGS..I  
6 ILKMGVPDKRK.....-GLFARRRQLLLE.....gPHLY YDPVN.....KVLKGEIPWSQE.IRPEA  
7 ALKQGWLHKKGggsstiSRRNWKKRWVLRQ.....SKLMYFENDS.....eEKLGKTV EVRTA..I  
7 PVQKGFLKKR...kwPLKGWHKRF FCLEK.....GILKYAKSQ-.....-ADIEREKLHG C.iDVGL  
7 GDCEGWLWKKK.daksyFSQKWKKYWFVLKD.....ASLYWYINEE....dEKAEGFISLPEF..I  
7 ERQEGHLLKKR...kwPLKGWHKRYFVLED.....GILHYATTRQ..ditkGKVHGSIDVRLS..VM  
3 RIREGYLVKKG....svFNTWKPMWV VLE.....DGIEFYKKKS.....dNSPKGMIPLKGS..TLT'  
6 IQLSGMYNVRK.gkmaqIPVNRWTRRQVILCG.....TCLIVSSVKD...svSGKMHVLP LIGG..K  
5 STMSGYLYRSK....gSKKPWKHLW FVIKN.....KVLTYAASE....dVAALESQPLLGF..TVT  
4 VRKVGYL RPK.....---SMHKRFFVLR AaseagpARLEY YENEKkwrhksSAPKRSIPLESC.f  
5 ILKEGMLTKQN....nSFQRSKRRYFKLRG.....RTL YYAKTAK.....SIIFDEVDLTD A..SVAES  
6 PTCRGYLHKRT...hsgFVKGWRKRWFVLKH.....dGFLLY YKHRK..degkWPPLDMIKLEGA.  
8 VYKSGFLARKI gkktprGKRGWKTFYAVLKG.....TVLYLQKDEYekalseEDLKNVSVHHA..I  
5 PIYGGWLLLAPfdnpvhRSRKWQRFFILYE.....HGLLRYALDE...mpITLPQGTINMNQC.tC  
5 LVRGGWLWRQS....sILRRWKRNFALWL.....dGTLGY YHDET...aqdEEDRVVIHFNV R..I  
7 VTIQGVLRRKTkegkktTVASRTKYWAALCG.....TQLFY YAAKSerkhfkSTSNKNVSVVGW.  
5 IVKQGYVKMKS....rKLG IYRCWL VFRK.ssskqpQRLEKYPDEK..svclRGCPKVTEISNV.kC  
6 LLGEGVLTKEC.....-RKKAKPRIFFL FN.....DILVYGSIVL..skrKYRSQHIIPEEV..TLEPLPE  
5 AKICAFLLRKK.....RFGQWTKLLCVIKD.....TKLLCYKSSK....dQQPQMEPLPLQGC..SITYI  
5 LLKGSQLLKVK.....SSSWRRERFYKLQE.....DCKTIWQESR..kvmrSPESQLFSIEDI.qEVf  
1 PECLGLLHQLE....rSTDVWIQH YCILKD.....GCLYFYASIR....sTQASGGLYLQGY..SVSE  
7 PLIEGKLKEKQ..vrwkFIKRWKTRYFTLAG.....NQLLFQKGKS...kdDPDDPIELSKV..QSV  
5 SMVEGSELKKV....rSNSRIYHRYFL LDA.....dmQSLRWEPSKK.....DSEKAKIDIKSI.keVRT  
1 IQREGALRFMvaaspgGTAQWQKCRLLRR.avagerFRLEFFVPPK....aSRPKVSIPLSAI.i  
5 AVMEGPLFLQS...qrfGTKRWRKTWAVLYP.asphgvARLEFFDHKGgrggsrRLDCKMIRLAE(  
6 SEKKGFLLKKS....dgIRKVVQRRKCAVKN.....GILTISHATS.....NRQPAKLNL L TC..QVKP  
3 RGFEGKLT AQGpeaggILSSGRERRVFLFE.....QIIIFSEALGggaqpgYVYKNSIKV SCL..G  
4 IVKQGYVRIRS....rRLGIYQRCWL VFKK.asskqpKRLEKFS DER...aayFRCYHKVELNNV.kf  
3 CIVHGYMSKMG....npFLTQWQRRYFYLFP.....NRLEWRGEG-.....EAPQSLLTMEEI..QS'  
5 AQMEGFLNRKHahnkkaSSRSWHNVYCVINN.....QEMGFYKDAKaasgipYHSEVPVSLKE  
4 GHRKGATKMKD....fARFKPMQRHLFLYE.....KAVMFCKRRFadrypsYSFKHCLKMEDV..C  
3 LHLEGLMCWKT.....TSGRLKDILAILL T.....DVL LLLQEKDyvfsvDSKPPVISLQKL..IVREV

6 IIKQGCLLKQG.....hRRKNWVKRKFILRE.....dpAYLHYYDPAG.....gEDPLGAVHLRGC..VV  
5 PEKVGWVRKFC..gkgiFREIWKNRYVVLKG.....DQLYVSEKEV...kdeKNSQEVFDLSDY..el  
7 FIVRGWLHKEVKnsipkmSSLKLLKRWFVLT.....NSLDYYKSSE....knALKGLTLVLSL.cS  
5 FVKSGWLLRQS.....tILKRWKKNWFDLWS.....dGHLYYDDQT...rqsIEDKVHMPVDCI..NIR  
6 VIKAGYLEKRR.kdhsfLGFQWQKRWCVLSD.....TVFYYYGSDK.....dKQKQGEFAIDGY..D  
5 VVRRGWLYKQD....stGMKLWKKRWVFLSD.....LCLFYRDEK.....eEGILGSILLPSF..QIA  
2 -----.....--GEWKKHWFVLT.....SSLKYRST..aeaaDELDEIDLRSC.tDVTEYAVQ  
7 IVREGFLLKRKpogglaTRFAFKRYFRLSG.....RDLYSKTPE.....WQVHTSIPLSCI..RAVI  
3 NFKKGWLTQY.....EDGQWKKHWFVLAD.....QSLRYRDSV..aeaaADLDGEINLSTC..yl  
3 ITKEGMLHYKA.stsYIGKEHWKACFVLSN.....GILYQYDRT.....dVIPLSVNMGGE..QCC  
9 TYKHGVLTRKTgktrprGRRGWKKFYAVLKG.....TILYLQKDEYdkalseGDLKNAIRVHHA..L  
6 VSHSGFLYKTAlqdrAREEFSSRWCVLGD.....GVLSYFENER.....aVTPNREIRASEI..VCL  
5 VMEGYLFRKRA....snAFKTWNRRWFSIQN.....SQLVYQKKLK....dALTVVDDLRLC..SV  
2 VIRRGWLTINN...islMKGGSSKEYWVFLTA.....ESLSWYKDEE.....eKEKMYMLPLDNL..KIR  
6 VLKQGYMMKKG.....hKRKNWTERWVFLKP.....NIISYYVSED....IKDKKGDILLDEN.cVE  
3 FTAEGYLYVQE.krpapFGSSWVKHYCMYRK...takkFNMIPFEHRS..ggkLGDGEAFFLKEC  
2 VIRKGWLTINN...igiMKGGSSKEYWVFLTA.....ENLSWYKDEE.....eKEKMYMLSVLNL..KLF  
2 PTIEGYLYTQE...kwaLGSWAKYYCRYEK...etrmLTMIPMEQK.....GAKQGPVDLTLK.yC  
6 AEMAAELGMRG....pkKGSVAKRRLVVLV.....NFLFYFRPDE.....AEPLGALLERC..RVA  
4 NQLSGNLLRKF.....kNSNGWQKLWVFTN.....FCLFFYKSHQ.....dSHPLASPLLYG..SLT  
4 TFLCDFLYQAPIssekkLLEETNKKWCVLEG.....GFLSYENDK.....sTTPNGTININEV..ICL  
2 --MEGVLYKWT.....nYLTGWQPRWFVLDN.....GILSYDSQD...dvcKGSKGSIKMAVC..EII  
6 MKHSGYLWTIG....knVWKRWKKRFFVLVQ..vsqyfFAMCSYREKK.....AEPQELLQLDGY..  
5 PVKEGPLFIHRkgkplASSSFKKLYFSLTT.....EALSFAKTSS...skkSTFIKLASIRAA.eKVEE  
3 LVKDGFLVEVS.....-ESSRKLHVFLFT.....DVLLCAKLLKfphelIEMKMKISALKS..EIQK  
4 VMKEGWMVHYT....sKDTLKRHYWRLDS.....KCITLQNDT.....gSRYYKEIPLSEI..ICLEF  
4 GTRKGYLSKRS....aDNPKWQTKWFALLQ.....NLLFYFESDS....sPRPSGLYLLEGS..ICK  
4 FLKEGTLMKLS.....-RKVMQPRMFFLFN.....DALLYTTPMQ...sgmYKLNMLSLAGM..KV  
7 LMQEGTMMRKV....rTKSWKKLRYFRLQN.....DGMTVWHGSQ....peSMPKPTFSISDV..el  
2 VERCGVLSKWT....nYIHGWQDRWVVLKN.....NLSYKSED...eteYGCGRSICLSKA..VI  
3 LMKLGTVARRG.....AMGIWKEFFCELSP....leFRLYLSDEE-.....RTCVESSLLRC..EAVG  
5 LLKQGEQQMStsrtrTKKLFREIYFLFN.....DLLVICRQIP...gdkYQVFDSAPRGLL..RVEE  
2 VSKKGYLHFLE.....pHTAGWAKRFVVR.....PYAYMYNSDK.....dTVERFVLNLSTA..QVI  
5 LHLEGWMKVPR..nnkrGQQGWRKYVLE.....SKVLIYDNE-.....AREAGQRPVEEF..EL  
3 NRICGFLDIED....neNSGKFLRRYFILD.....qaNCLLWYMDNPqnlavGAGAVGSLQTYI..sK  
3 DLMSGDLLLHTpaslgkWKKEPELAAFVFKT.....AVVLVYKDGSYeewdpFRFRHMIPTEAL..  
3 SVICSFLHYME.....kGGKGWHKAWFVPE....nepLVLYIYGAPQ....dVKAQRSLPLIGF..EV  
0 IKQIGWLTEQL.....PSGGTAPTALLTE.....KELLYCSLPqrealSRPTRTAPLIAT..RLVH  
6 KGLEGVIRKRSfcgrdqVCYRWSKRWLVLVD.....SFLLYMRPET...galSFVQLFD-PGF..EV  
4 SIKEGILKLEepskilSGNKFDRCVLRD.....GHLFIYKDPK.....sSKHDKMFPLRAM..KFY  
4 LLREGPVLKIS....fRRSDPMERYLVLFN.....NMLLYCVPRVlqvgaqFQVRTRIDVAGM..KVI  
2 LLCHGELKNKS.....----GHKLYIFLFQ.....DILVLRPVTnerhlyQVYRQPIPVQEL..VLEDLQI  
3 VKHIAWLAEQA..klgdGRQQWRPVLMVTE.....KDLLYDCMPwtrdawASPCHSYPLVAT..  
2 VSKKGYLHFKE.....pLSSNWAHWFVVR.....PYVFIYNSDK.....dPVERGIINLSTA..QVEY  
7 VRKAGALAVKNkvesaTRRKWKHYWVSLKG.....CTLFFYETDGsgidhnSVPKHAVWVEN  
1 IQREELLSFMGItsgggGQPQWQKCRLLLRSegeggsSRLEFFVPPK.....aSRPRLSIPCSTI.t  
5 PELADYIKVFK..pkkiTLKGYKQYWCTFKD.....TSISCYKSKE...essGTPAHQMNLRGC..EV  
6 PELEGALYLKE.....dGKKSWKRRYFLLRA.....SGIYYVPGK..tktsRDLACFIQFENV..NIYY  
3 FLHSGKLYKAK.....--SNKELYGFLFN.....DFLLLTQITKksnlqyKMYKTPIFLNEV..LVKLPT  
2 DTKHGMKMFREllglIPSGGFHDYFILNS.....SCLRLYKEVR.....sHRPEKEWPVKSL..KV  
3 FIRLGSLSKLS.....-GKGLQQRMFLLFN.....DVLLYTSRGL.tasngFKVHGQLPLYGM..TIEE



7 VRKAGWLFFKPrklelvARRKWKQYWVTLKG.....CTLLFYETYGnsteqnSAPRCALFAEDS.  
6 KGLEGMIMKRScchggrACYRWSKRWLIVKD.....SFLLYMKPDS.....GAIAFVLLVDKE.fRV  
3 IRHLGWLAEKV...pgeSEKQWKPALVVLTE.....KDLLIYDSMPrrkeawFSPVHSYPLLAT..RL  
4 GTRKRGFLSKKA.....aEASRWHEKWFALYQ.....NVLFFYFEGEQ....sGRPAGMYLLEGCS.  
4 FIRQGS LIQVPvrlgsISLKKEGERQCFLFT.....KHFLICTRSSggklhLKTGGVLSLIQC..TLIEF  
2 VTYMSQVTIQC.....aGSEEKNERYLLLFP.....NLLLMLSASP..rmsgFIYQGKLPPTGM..TITF  
3 VIMADSLKIRG.....TLKSWTKLWCVLKP.....GVLLIYKTPK....vGQWVGTVLLHCC..ELIEF  
5 LILQDAFQVWD...pksLIRKGRERHLFLFE.....ISLVFSKEIKssghkYVYKNKLLTSEL..GVTE  
4 GTRKGYLSKRS.....aDNPKWQTKWFALLQ.....NLLFYFESDS.....sPRPSGLYLLEGS..ICK  
3 YYKERLLYLEEchgeIKNNRGVKLHVFLFQ.....EVLVITRAVTneqlyQLYRQPIPVKDL..TL  
5 SRIEGWLSVPN..rgniKRYGWKKQYVVVSS.....KKILFYNDEQ..dkeqSNPSMVLDIDKL.fH  
3 LIKEGHILKLS.....aKNGTTQDRYLILFN.....DRLLYCVPRLRlIggkFsvRARIDVDGM..ELKE  
3 LIKEGHILKLS.....aKNGTTQDRYLILFN.....DRLLYCVPRLRlIggkFsvRARIDVDGM..ELKE  
5 PEIHGFLHAKE....qGKKS WKKAYFFLRR.....SGLYFSTKGT....sKEPRHLQLFSEF.sTSH  
3 LIKEGSIQKLS.....aKNGTTQDRHLFLFN.....NVMLYCVPKLRlmgqkLSVREKMDISDL..QVC  
3 LLHSGKLYKTK.....--SNKELHAFLFN.....DFLLTYLVRkssaqrMYKTIPLNEV..LVKLPT  
3 LVRDGSVFLKS.....TTGRLKEVQAVLLT.....DILVFLQEKDyivasIDHKSTVISLKKL..IVREV  
3 LIHEGCLLWKT.....ATGRFKDVL LLLMT.....DVLVFLQEKDyifitsLDKPSVVS LQNL..IVRDI  
5 LLMQGSFSVWTtkvkeIARFKPMQRHLFLHE.....KAVLFCKKREyekapsYSYKQSLNMTAV  
6 PEIQGFLQLRG.sgrgsGRKLWKRFFCFLRR.....SGLYYSTKGT..skdpRHLQYVADVNES..I  
4 FVRQGS LMQMSgrlgsISTKKEGERQCFLFS.....KHLICTRGS.ggklhLTKNGVISLIDC..TLL  
3 LLHDGLVYWKT.....ATGRFKDILALLT.....DVLVFLQEKDyifaavDQKPSVISLQKL..IAREV  
4 PQGDGEIRITT.....IDKHTKRERHIFLFD.....LAVIVCKRKG....dnYEMKEIIDLQQY..KIANNF  
5 PEIQGFLQVKE....vGRKSWKKLYVCLRR.....SGLYYSTKGT..skepRHLQLLADLEES..SIF  
3 PKIDGELK VRS.....iVNHTKQDRYLFLFD.....KVVIVCKRKG....ysYELKEVIELL FH..KMTDI  
4 PKIDGELKITS.....vERRSKTD RYAFLLD.....KALLICKRRG....dsYDLKASVNLHSF..QVRDI  
3 PKIDGELK VRS.....iVNHTKQDRYLFLFD.....KVVIVCKRKG....ysYELKEVIELL FH..KMTDI  
3 FIMEGTLTRVG.....--AKHERHIFLFD.....GLMICCKSNHgassaeYRLKEKFFMRKV..QIND  
3 FIMEGPLTRIG.....--AKHERHIFLFD.....GLMISCKPNHgyssaeYRLKEK FVMRKI..QICDKI  
4 LYNEG YLYRLE.....-DSSIRRRFVVLRS.....KQLNFYAEKG.....GQYLDTFQLSKT..VVSIP  
4 LYNEG YLYRLE.....-DSSIRRRFVVLRS.....KQLNFYAEKG.....GQYLDTFQLSKT..VVSIP  
2 AQKEGVLLKYI.....ENSGLVSR YFY LKD.....NILYFAENRN.....SPVLGTIHLKDA..QVNR YI  
2 AQKEGVLLKYI.....ENSGLVSR YFY LKD.....NILYFAENRN.....SPVLGTIHLKDA..QVNR YI  
5 ADCHGW MRKRS.....dRYGVWKSRYFVLKG.....TRLSYYHSLN.....dASEKGLIDMTSH..R  
5 ADCHGW MRKRS.....dRYGVWKSRYFVLKG.....TRLSYYHSLN.....dASEKGLIDMTSH..R  
4 YIKQGILKFQ SeshkfrKKEVWSTVLAVLQR.....DVFTLYNLNTdpkldISKV GKPVIKTT..IIA  
3 LLC DGYLCQQG....gDCPYWRRRYFQLIG.....SKLVAFQQFS.....KVR RATIDLSEA.tHIVL  
2 IFKEG LLLVFGtdlamvSKAAWHKH WIVVEN.....GSLWEYANWK...dsvKSNVSSISLKHA..S  
2 SAKQG LLLAF SsdIqvGKSGWHKYWVVDH.....GKICEYANWK...qsIELHTEPIDLLMA..T  
2 SAKQG LLLAF SsdIqvGKSGWHKYWVVDH.....GKICEYANWK...qsIELHTEPIDLLMA..T  
4 HGKEGFATLKRccnttmMKTRS QPFWIVSE.....SCIILCDNML.....SMQPADVFIWDV..DFE  
6 PIMAGYLIRKT.....SFLKKKQRGFYAFT....hsGYLYEFKSSD..slqdPEPEFALYIPDC..LIGR  
5 TKRQGWLLRNlssskadNKAIWRKYWFFVDN.....GYVGYLINDA...nggVF ESEKIGVLLC..K  
4 VLKSGWLIKKG....hATSTKKQLWAVLRR.....DQLSFYKDE-.....-----KDI.sAVAYYKEK.  
5 IIRSGWV MLKE...dkmKYLPWTKKWLVLSS.....NSLSIYKGSK....sESAQVTL LLLKDI.qKVE  
4 QHMSGYLK KWT.....nYKSGYKLRWFTLNN.....GVLSY YKNQD...dasSACRGSINL KLA..R  
2 VLMQGTIHWLH....gNLHRWSK CWAVVRG.....YGMTIYNTNR.....eYKPVKVIPIADI.qDVA  
6 SIQNGCSLLRI.....TKKKVRQRKVSLDP....isGYLMLDKNTG....kaYKKLCVDDIKEI.rQGRD  
6 SIQNGCSLLRI.....TKKKVRQRKVSLDP....isGYLMLDKNTG....kaYKKLCVDDIKEI.rQGRD  
8 QII SGTLLKKR....rkKGQGYARRYFTLNM.....veGTISY YANEN.....sSVMRGKIPLSIA..VISV/  
7 WHRRGMISYK KsknnrwVAGYWKKKY CIVDS.....GKLIFYKSDHnacsnvSPIHREFGLQSC.

2 AQKKAYERRYK.....NFTTTSSSFDTLQG.....idTEAMEYEFPKtppleeFSPDTSYSLVNA.fAY  
6 ISKIGTLNVYSfrffssLFRKRKPRTFILTN.....fgRYLCVASDGE....grKTVKEEIIPIKSV..GMRCF  
6 ISKIGTLNVYSfrffssLFRKRKPRTFILTN.....fgRYLCVASDGE....grKTVKEEIIPIKSV..GMRCF  
2 AQKKAYERRYK.....NFTTTSSSFDTLQG.....idTEAMEYEFPKtppleeFSPDTSYSLVNA.fAY  
0 PSLASEQMHDS.....dADSLFQSANDHLNRakatqdcRGLLFYSKSKQ....stSVPSGIINLTDA.vS  
3 LIQKGPLYQKP.....hKHSVFSKYVVLIS.....GFIVLFHCFHakevleYAHYVTIPIDDC..YLYSC  
3 RYHEGVFLILQnnngthAARKWKDVYGVLLG.....TQLALWDAKEkkikevASKPTYINLTDA..1  
4 ADCSGWMSKKG....tgAMGTWKQRFFTLHG.....TRLSYFTNTN.....dEKERGLIDITAH..RV  
4 ADFSGWMSKKG....sgAMSTWKTRFFTLHG.....TRLSYFSSTT.....dTRERGLIDITAH..RV  
3 LVLSGTVYKKR.....dLWLDPTPVYIALLD.....NCLLITEEISgetqkyKLIERPIPIDYL..SLEKRK  
3 KKKSGWVSYKD...dgiLSFIWQKRYLMLHD.....SYVALYKNDK....qnDDAILKIPLTSI.iSVSR  
5 NVKDGSLRR.pktltGNSTWRVRYGILRD.....DVLQLFDKN-.....-QLTETIKLRQS..SIELIF  
5 QGKQGYLVIRSkhafkdMIDRHTTKWFLVRN.....SYLTYVSDLS.....sTTPLDVFLIDWK.fKVf  
1 ISKFGELLYFDisttnsSSEPEREFEVYLFE.....KIILFSEVVssliikKKSSTASISAS..NITDNNC  
5 EIKSGFLERRS....kFLKSYSKGYVLT.....NFLHEFKTAD..rkdLVPVMSLALSEC..TVTE  
2 CIKAGYFLKKS....eLLPTYHQGYFVLT.....NYIHEFQSSDirkksyLAPIMSIPLNDC..TLKD/  
5 EVKSGFLEKRS....kFLKSYSRGFYVLT.....SFLHEFKTPD..khkfstPLMSIPLVEC..TVTE  
2 TSRRTSLSYLN.....KDSEWERVKIQVKE.....GRIFIKIKPdyfkdiSSSYFAYSLLA..EAHV  
3 VKKEGWISYKV...dgiFSFLWQKRYLVLND.....SYLAFYKSDK....cnEPPVLSVPLTSI.tNVS  
5 PEKSGWLYMKT.qvgkpTREIWWRRWCFLKN.....avFGMFLSPSK..tyveETDKFGVFLTNV  
5 KGLSGWLYMKTtvghdpKRVVWRRWCFLQN.....NVFGVFSLSP..sktyVEETDKFGILWI..  
3 PTYKGFLLKWT....nFAHGYKLRWFILSG.....dGNLSYYKDQS....hvDRPRGTLKVSTC..RL  
3 PTYKGYLLKWT....nFAQGYKLRWFILSS.....dGKLSYYIDQA...dtkNACRGLNMSSC..SL  
4 TVIGEYLFKYYprlpgfGFESRHERFFWVHP.....YTLTYWSASilenpaNTKTKGVAILGV.eS'  
4 VKMSGNLNIRT.....KLIRSTRYWCVLKN.....HLFSMYTSST....eYFPVLTIDLREV.qKIETQ  
9 RYLQGYLLKKR....rkRLQGFKKRFFTLDF.....ryGTLSSYYLNDH.....nQTCRGEIVISLS..SVS/  
8 QVCSGILYTKVkkklfNRAKWQKFVELTN....tsFNLYSFKTG-.....-KLKKSILDKI.iDCIELI  
2 RIHSDLVHRSD.....QSQHLHRLFTLPT.....RSASEFKKADsryltdEALYKSFTLQNA..RFG  
1 KKIGGFFRRPFsiggnTSSSNYSLSILSQ....evsSNKSILPSILvdsmlHDLKPSYSLKTF..EII  
3 IYKEGYLLQDG....gdLKGKIENRFFKLHG.....SQLSGYHEI-.....-SRKAKIDINLL..KVTKVLF  
2 RYHYGIFLILHktdgtpAARQWEECYGVLLG.....TQLALWDAKEEstmkaASRPSFINFTDA..S  
6 VLQRGIMIRMT....rRRRKfyEFKLINN.....GQIIWKDGS-.....-KYLELDSVKDI..RIGDTAS

VEDP.....RKPNCFELYNpSHkgqvickackteadgrvvegnhVVYRISAPSPREEKEEWMKSIKASI:  
:VDDP.....RKPNCFELYIpNNkgqlikackteadgrvvegnhMVYRISAPTQEEKDEWIKSIQAAV:  
EVEDS.....KKPNCFELYIpDDkdqvikackteadgrvvegnhTVYRISAPTPEEKEDWIKCIKAAIS  
\_MKTERP.....-KPNTFIIRCIQW.....ttvIERTFHVDTPEREEREWTEAIQAVAD  
LMKTERP.....-RPNTFVIRCIQW.....ttvIERTFHVDSPDEREEWMRAIQMVAN  
LMKTERP.....-RPNTFIIRCIQW.....ttvIERTFHVETPEEREEREWATAIQTVAD  
KLEEG.....sfNKKNMFQVIHtEK.....-TLYIQANNCVEANEWIDVLCRVS  
/KN.....ddgvipcQNKFPFQVVHdAN.....-TLYIFAPSPQSRDRWVKLKEEIK  
TVIPeknprrqjprgeessemeqisiiieRFPYPFQVYdEG.....-PLYVFSPTTEELRKRWIHQLKNVI  
RLEEE.....sfRMKNMFQVIQpER.....-ALYIQANNCVEAKDWIDILTKVSQ  
VKS.....disipchYKYPFQVVHdNY.....-LLYVFAPDCESTRQRWVLTKEETR  
QVDAGLTF.....nkkefENSYIFDINTiDR.....-IFYLVADSEEDMNKWVRCICDICG  
eQVDAGLTF.....nkkelQDSFVFDIKTsER.....-TFYLVAEATEADMNKWVQSICQICG  
IECKQS.....dimMRDNLFEIVTtSR.....-TFYVQADSPEEMHSHWIKAVSGAIV  
LVKS.....gdIIMRDNLFEITtSR.....-TFYVQADSPEDMHSWIEGIGAAVQ  
VQFD.....ysqERVNCFCLVFPFR.....-TFYLCAKTGVEADEWIKILRWKLS  
YDHLR.....saakspNPALTFVCVKTDR.....-LYYMVAPSAEAMRIWMDVIVTGAE  
RAAEE.....ttsNNVFPFKIHIhSK.....khRTWFFSASSEDERKSWMALLRREIG  
PCLE.....yeNRPLLIKLTtRS.....TEYFLEACSREERDSWAFAITGAIH  
LVSALEDN.....gvptgkgnVQGNLFKVIKtDD.....THYYIQASSKAERAEWIEAIKLT  
KNF-.....---KTFVHTpNR.....-TYYLMDPSG-NAHKWCRKIQEVWR  
EIIDNTS-.....-KENGIDIILaDR.....-TFHLIAESPEDASQWFSVLSQVHS  
SVMS.....vkKSSKCIDLDTeEH.....-IYHLKVKSEELFDEWVSKLRHHRM  
IDRASEC.....RKKYAFKACHpKI.....KSFYFAAEHLDDMNRWLNRLINMLTA  
ISINKK-.....-AQRIDLDTeDN.....-IYHLKIKSQDLFHSWVAQLRAHRL  
SPCQD.....fgKRMFVLKITTtKQ.....QDHFFQAAFLEERDAWVRDIKKAIK  
/EEVKK-.....-HQHCLAFSSsGP.....qsQTYIICFDTFTEYLRWLRQVSKVAS  
LVKDE.....nSESKVFQLLHkGM.....VFYVFKADDAHSTQRWIDAFQEGTV  
JINKRADS.....KNKHLVALYTrDE.....-HFAIAADSEAEQDSWYQALLQLHN  
ISTK.....NVNNSFTVITpCR.....-KLILCADNRKEMEDWIAALKTVQN  
EVDIDNSL.....GKPFVFNCPqSG.....sRILCLCATSNQEMKRWLEAMQRAAR  
LASKATDY.....eKKNPVFKLKTaDW.....RVLLFQTQSPEEMQGWINKINCVA  
VVDGEAR.....tGQKFSLCILTPDK.....-EHFIRAETKEIISGWLEMLMVYPR  
DIKVGQEC.....qdvqpegrSRDGLLTVNLrEG.....SRLHLCAETRDDAIAWKTALMEAN  
MVMMAADDP.....EHPDLFLLTDsEK.....gNSYKFQAGSRMNAMLWLKHLSAAC  
VTRLPKE.....tKRQAVAIIFTdDS.....-ARTFTCDSELEAEWYKTLsVECL  
T.....IQAKNRWMIKTaKK.....-SFVVSAASTTERQE WISHIEECVR  
PRD.....skKKKHELKITQqGT.....DPLVLAVQSKEQAEQWLKVIKEAYS  
RMGHRT.....eglekfardiPEDRCFSIVFkDQ.....rNTLDLIAPSPADVQHWVQGLRKiID  
QTHG.....FEQPVIELKPsSE.....efKTFYFCAENKTENQRWIAALKTSIK  
/KAVAK.....krrdrSLPRAFEIFTdSK.....-TYVFKAKDEKNAEEWLQCINVALA  
FGKNT.....difrsngiseqiSEDCAFSVIYgEN.....yESLDLVANSADVANIWVTGLRyLIS  
EVRTTMPL.....empEKDNTFVLKVeNG.....AEYILETIDSLQKHSWVADIQGCVD  
C.vSVVPVTV.....sppePGAAAFRLDTaQR.....-SHLLAADAVSSTA-WVQTLCRT/  
NAE-.....-DKKSFDLIShNR.....-TYHFQAEDEQDYIAWISVLTNSKE  
LEGNLQG.....NPCRFALTSrGP.....eggiQRYVLQASDPAVSQAWIKQVAQILE  
VVARLPKS.....TKKHAIGIYFnDD.....TSKTFACESDLEADEWCKVLQMECV  
VEETQI.....KERKCLLLKlrGG.....KQFVLQCDSDPELVQWKKELRDAYR  
A.ICEVALDY.....kKKKHVFKLRLsDG.....NEYLFQAKDDEEMNTWQAISSAIS  
GITEHVKG.....-DNRKFEIRYsEK.....eEYIVQAPNVDVKMLWLKEIRKILV  
/ANE.....-EKAMFLISAsLQ.....gpEMYEIYTSSKEDRNAWMAHIQRAVE

TSVESS.....hdgkksDEENLFEIITaDE.....VHYLQAATSKERTEWIKAIQVASR  
KCEELRKS.....ksrskKNHskFTLARcRQ.....pgttaPNLIFLAVSPEEKESWINALSSAIT  
;VPPDEK.....ifKETGYWNVTVyGR.....kHCYRLYTKLLNEATRWSsAIQNVTD  
!TGHEC.....rdiqppdgkPRDCLLQIVCrDG.....KTISLCAESTDDCLAWKFTLQDSRT  
VRMNNTL.....rdkgKKDCCFEICApDK.....RIYQFTAASPKDAEEWVQQLKFIQ  
MLTAE.....dhiNRKYAFKAAHpNM.....RTYYFCTDTGKEMELWMKAMLDAAAL  
!.....-RNYGFQIHTkDA.....-VYTLSAMTSGIRRNWIEALRKTVR  
EHVDE.....gafQLPHVMQVVTqDG.....agtsHTTYLQCKNVNDLNQWLSALRKASA  
DVTEYPVQ.....-RNYGFQIHTKEG.....-EFTLSAMTSGIRRNWIQTIMKHVL  
3GCRRS.....nttDRPHAFQVILaDR.....PCLELSADSEAEMADWMQHLCQAVS  
ATRASYD.....sKKS NVLKLKtADW.....RVFLFQAPSKEEMLSWILRINLVAA  
.AVPPP.....dthGFEHTFEVYTeGE.....RLYLFGLSAEQAHWVKCIAKAFV  
KPCEDI.....ERRFCFEVVSPTK.....-SCMLQADSEKLRQAWVQAVQASIA  
DVEKG.....fmSNKHVFAIFNtEQ.....rnvykdIRQIELACDSQEDVDSWKASFLRAGV  
:SLPDK.....dGKKCLFLIKCfDK.....-TFEISASDKKKKQEWIQAISTIH  
..TKRHMDST.....DRRFCFDIEAaDR.....pgVPLTVQAFSEEERKQWLEALGGKE  
RDVEKG.....fmSSKHIFALFNtEQ.....rnvykdyRQLELACETQEEVDSWKASFLRAGV  
VRRKTES.....iDKRFCFDIETnER.....pGTITLQAPSEANRRLWMEAMDGKEP  
\QEE--.....--PGGFSISFvED.....IsRKYHFECSSQEQCQDWMEALQRASY  
PIPSES.....eniHKDYVFKLHFkSH.....-VYYFRAESEYTFERWMEVIRSATS  
AIHKE.....dfyIntGPIFIFEIYLpSE.....RVFLFGAETSQAQRKWTEAIAKHfV  
<VHPA-.....-DNTRMELIIPGE.....QHfYMKAVNAERQRWLVALGSSKA  
TVDYTDPO.....pglegGRAFFNAVKEgD-.....-TVIFASDDEQDRILWVQAMYRATG  
3KSFG.....-SSHIMQVIYaDD.....vgraQTVYLQCKCVNELNQWLSALRKAST  
EKAN...kqgsraierlkkkmfeneflllnSPTIPFRIHNrNG.....KSYLFLSSDYERSEWREAIQKLQK  
?AKPS.....altpvGATPHCFEITtANV...vyyvgenvvnpsppnNSVLPsGIGPDVARMWEVAIQH/  
RAPSP.....krgtsskesgekqrhsrsrRRRNVLRRQPtRI.....sKTFRLVAIELTGMT---ATLEVSFS  
RKPTQE.....AYQNELKIESvER.....-SFILSASSAAERDDWLEAISSSIE  
RIRKGQDS.....ellrylveefPLEQGFTVVfHGR.....rPNLDLVANSVEEAQIWMRGLQLLVI  
TPHDF-.....-DECRFDISVnDS.....-VWYLRQDPEHRQQWVDAIEQHKt  
;PAH-.....-SDGRFELVFsGK.....-KLALRASSQDEAEDWLDREVREALQ  
LEDQ.....gqTLANVFILRLIEN.....addreATYMLKASSQSEMKRWMTSLAPNRR  
EYSEDQ.....qamIKTPNTFAVCTeHR.....-GILLQANSDKMDHDWLYAFNPLLA  
CLPDGD.....vsihgavgaselantakaDVPYILKMESHPh.....ttcwpgrTLYLLAPSFPDKQRWVTALE:  
VSIATPK.....qkpKTPFCFVINAISQ.....-RYFLQANDQKDLKDWVEALNQASK  
QVRALPSA.....daEANA VCEIVHvKS.....esegrpeRVFHLCCSSPESRKDFLKSvHSILl  
'GPPEAG.....erpDRRHVFKITQsHL.....-SWYFSPETEELQRRWMAVLRGRGR  
3GPS.....kgs vpyDAELSFALRTgTR.....hgvDTHLFSVESPQELAAWTRQLVDGCH  
'/QVGKRS.....tETRYGVRIDTsHR.....-SLILKCSSYRQARWWGQEITELAQ  
LGvKK.....----KMKPpTR.....-----  
RELTDa.....EFPHSFLVSGkQR.....-TLELQARSrDEMVSWMQACQAAID  
DG.....dvrmggsfrgafgnsdKAKNIFRVRfQDP.....spgHSHTLQANDVFHKQQWFNCIRAAIA  
.RLVHSGSG.....crspslGSDLTFATRTgSR.....qgiEMHLFRVETHRDLSTWTRILVQGC  
'SEDQ.....qamvKTPNTFAVCTkHR.....-GVLLQALNDKMDNDWLYAFNPLLA  
IS..IVQAVPEH.....pKKDFVFCLSNsLG.....DAFLFQTTsQTELENWITAIHSACA  
'DVRTATAL.....empDRENTFVVKVeGP.....SEYILETS DALHVKA WVS DIQECLS  
'/TPDVNI.....sGQKFNIKLLIPVA.....egmNEIWLRCdNEKQYAHWMAACRLASK  
'GIQC.....kmkykaPTDHCFVLKHPqI.....qkesqYIKYLCCDDARTLSQWVMGIRIAKY  
'DP.....sGDEPIFHISHiDR.....-VYTLRAESINERTAWVQKIKAAASE  
YLGvKK.....klrpPTCWGFTVVHeTE.....khekQQWYLCCDTQMELEWRFATFLSVQI  
3EEEE.....wGVPHCLTLRGqRQ.....-SIIVAASSRSEMEKWMEDIQMAID

.IVQSVPEH.....pKKEHVFCLSNsCG.....DVYLFQATSQTDLENWVTAIHSACA  
'KVGRKE.....tETKYGLRIDNISR.....-TLILKCNSYRHARWWGGAIEEFIR  
\_VHSGPG.....kgsppqGMDLSFATRTgTK.....qgiETHLFRAEISRDLSHWTRSIVQGCH  
CERTPAP.....prtnagpagardaIDKQYYFTVLFgHD.....gqKPLELRCEEEQAGKEWMEAIHQ  
EPDG.....sdddpgksghmfgHLDFKIVVEPpDA.....asFTVVLLAPSRQEKAAMMSDISQCVD  
KLEDS.....eNHRNAFEISGsMI.....ERILVSCTSQQDLHEWVEHLQKQTK  
?PSK.....KDGFCFKLFHpLDvwavkgpkgesvgsitqplpsSYLIFRAASESDGRCWLDALALF  
EIVEG.....-DPCKFALWSgRT.....pssdNKTVLKASNIETKQEWIKNIREVIQ  
.RAPSP.....krgtsskesgeKQQHYFTVNFsND.....sqKTLELRTEDAKDCDEWVAIARASY  
EDLQDG.....evrlggsirgafsnneRVKNFFRVSFkNG.....sqSQTSLQANDTFNKQQWLNCIRQ  
VRPVTQG.....dvyraeteEIPKIFQILYaNE.....gecrKDVEMEPVQQAekt---NFQNHKG  
3SNL.....NMPRTFLVSGkQR.....-SLELQARTEEEKDWVQAINSTLL  
3SNL.....NMPRTFLVSGkQR.....-SLELQARTEEEKDWVQAINSTLL  
VYMSL.....agkkkhgaPTPYGFCLKPNKA.....ggprDLKMLCAEEEQSRTCWVTAIRLLKD  
QDIVKP.....NAACTFIITGrKR.....-SLELQTRTEEEKKEWVIQVIQATVE  
rDP.....sSDEPVFHISHiDR.....-VYTLRTDNINERTAWVQKIKGASE  
'AHE.....-EKGLFLISMgVK.....dpEMVEVHASSREERNSWIQIIQDTIN  
IANQ.....-AKGMFLISSgPP.....EMYEVHAASRDDRTTWIRVIQQSVR  
..GITENVKG.....-DTKKFEIWyNAR.....eEVYIIQAPTPEIKAAWVNEIRKVL  
NVYVVTQG.....rkygmPTDFGFCVKPNKL.....mghkGLHIFCSEDEQSRTCWLAAFRFL  
DEPEN.....lddeakgapeIEHLEFKIGVePK.....dslpFTVILVASTRQEKAAWTSDIIQCVD  
/ANE.....-ERGMFLISAsSA.....gpEMYEIHTNSKEERNWMMRRIQQAVE  
?TT.....dkenkKWSYGFYLHtQG.....qNGLEFYCKTKDLKKKWLEQFEMALS  
?YLIAG.....kkqynaPNEHGMCIKPNKA.....ktemkELRLLCAEDEQIRTCWMTAFRLKY  
JPMH.....nkdikKWSYGFYLHIQG.....kQGFQFFCKTEDMKRkWMEQFEMAMS  
DSSG.....erdnkKWSHMFLLIEdQG.....aQGYELFFKTRELKKKWMEQFEMAIS  
JPMH.....nkdikKshgkMWSYGFYLHIQG.....kQGFQFFCKTEDMKRkWMEQFEMAMS  
KDDT.....sEYKHAFELVskDG.....NSVIFSAKSAEEKNNWMAALISLQY  
EDA.....cEYRHAFELVskDE.....NSVIFAAKSAEEKNNWMAALISLHY  
MVN.....fseavsnIGLVAGILATSvDR.....RHVQLFADSKKVCQKWLVQVMNSRSF  
MVN.....fseavsnIGLVAGILATSvDR.....RHVQLFADSKKVCQKWLVQVMNSRSF  
NAN.....lpifsiidppheftgeNYQSAFVIQEkQT.....etrtgtaTVHVLLARDVEDQKSWLRILRQVP  
NAN.....lpifsiidppheftgeNYQSAFVIQEkQT.....etrtgtaTVHVLLARDVEDQKSWLRILRQVP  
VTKTDDI.....vlsGGKTAIKLIPpAP.....gaakaavmftppKVHYFTCENNEELHRWSSAFLKAT  
VTKTDDI.....vlsGGKTAIKLIPpAP.....gaakaavmftppKVHYFTCENNEELHRWSSAFLKAT  
3LAKP.....fpssedavviksTNSLYFDLETsSQ.....LKLRFAGSPKDAQGWIDALNYWAA  
JDNHY.....sdeeelegylYFESGFRIIFsNG.....DYIDFYAETVGEKDEWMSTLRQHLG  
3ADKVRKQ.....GRRFCFEVVTpKL.....-KRLYQATSAEEMDSWIEAICEAAK  
VRPAQSV.....SRKFCFEVITpQT.....-KRTYQATSKAEMHSWIEAIQYSIS  
VRPAQSV.....SRKFCFEVITpQT.....-KRTYQATSKAEMHSWIEAIQYSIS  
EITRKN.....frkahskdtnekirLSHHSFKIKNRqK.....-VMKLSVRSG---RWLQQFINSVQ  
PSE-.....-KKPKFKITGkDA.....tkkifgarNDYAFRASNTELNRWWEALNTHIA  
.FSVLPSN.....HRKFCFQIKTksV.....-SYILQAETHMEMLEWGSVINNARE  
.....-SPKTFFLYLnEK.....-IIRLIATSNEDEEWWVHLRSTTG  
.RSKS-.....-RTFCFKLRFkSS.....tknfeiQACELSVADNMECYEWMDLISSRAL  
LVHDPK-.....-QPTVFQVIGkGS.....VRYSVKANSPEAKKWIAAIISSAIE  
EINVP.....esSHKYFFTVITqNK.....-PIEFRVDNEDSLILWVAALKTSID  
JARNY.....reqykisseNEKRWFIIYcAD.....nkIKAMHMISPTLDAHNQWIMALEGLKT  
JARNY.....reqykisseNEKRWFIIYcAD.....nkIKAMHMISPTLDAHNQWIMALEGLKT  
AAE-.....-THEINVDSgVE.....-LWNLRAHTHQDWLRWCNALEKAKN  
..LASPNLPP.....sinsNRNNVFYLNlPgn.....ECYLFEAPSVLAMNEWIHSLNFNAA

'CDRDKK.....nVRNCSFTVIFrDG.....SEETLCAPTEESMIEWVAKINYIST  
RMVK.....NNEHGWWVETpTK.....-SWSFEDPNG-PASAWVELLDKASS  
RMVK.....NNEHGWWVETpTK.....-SWSFEDPNG-PASAWVELLDKASS  
'CDRDKK.....nVRNCSFTVIFrDG.....SEETLCAPTEESMIEWVAKINYIST  
;IEPGTG-.....---NKFTINFnNG.....KSETLEALDPESKNTWITDLKNAIA  
3TTTdrtfdeinygshalprvygdgwrsvdedESSRCFTLWFgTRnsnvpnsntdkihftkklgvsgKSMVFMARSRQERDLW  
FLRTL DNS.....dnivmecgkNLTNALVVSTtLK.....NRYFLQFGNKESFNAWNSAIRLCL`  
LPASDD.....drlislyaaslgKGKYCFKLVpQP.....gskkgltftqRVHYFAVENKSEMKAWSAIIKAT  
/PAKED.....dklvslyaastgKGRYCFKLLPpQP.....gskkgltftqRTHYFAVDNKEEMRGWMAALIK`  
.IPkssgnhmstaygdrktsnteisnnpnTDEFSFKIRnTAT.....gESFKFFTESAEVLNQWIDAIMESFK  
{TQL-.....-KQYCFELVRcSDrnsvsngssslnvssdsnskKSIYIATKTESDLHSWLDAIFAKCP  
'NL.....pedrfGTRNGFLITEhKK.....sglstTKYYICTETESKERELWLSAFSDYID  
RFSGNKleefgiendannildkngskthqkksNISSKLLLLTIEN.....seRKLKIICKSESSLKQWMSSIIKM  
3SnsnsnssssslfklsanepklDrgrIMIMNLNQIIPqNN.....rslnitwesikeqGNFLLKFKNEETRDNWSSCLQQLI  
;HSRK.....nstsspntGSDAKFVLHAKQN.....giirrgHNWVFKADSYESMMSWFDNLKILTS  
ASSTHkflkgskpknkntksseldqfyaaaqKESNNYVTWTFKI.....VSPEPSEELKHFKRWVQDLKNL  
:HSKK.....tknsnEQGKNKFILRTnSN.....glihrgHNWVFKVDSYDDMIEWFGNIKALSS  
/QDN.....iigsgamksnvcnkntkRKSGNFTVSpEN.....ingpkLVLEFQTRSVEEAHKFMDcINFw/  
RIQL-.....-KQNCFEILRaTD...qkenispinsyfyensksRSIFISTRTERDLHGWLDAIFAKCP  
..RYDPEED-.....-RKFCFEVKIfGN.....kvteahdnmskdITLVFQTSNYLDLKSWLIAFEATk  
.TVEYLPKE.....PRNFCFKLRlqNP.....nckteeentyIDIILQAESIDELKSWINTLTSHKR  
\_HIDSS-.....-EKLNFELLGgIT.....gtTRWRLKGNHPIETTRWVNAIQSAIR  
.HLDSS-.....-EKLKFEIIGgNN.....gvIRWHLKGNHPIETNRWVWAIQGAIR  
VTDPNPY.....ptgLYHKSIVVTTeTR.....-TIKFTCPTRQRHNIWYNSLRYLLQ  
!KHT.....IngSATKTFKLYTdES.....-TFKFNADSEFSAKSWVNALKKEQF  
^NKK-.....-DKIIIDSgME.....-VWVLKATTKENWQSWVDALQTCFD  
DNN.....skmkNDDTNFALITfDE.....-RLSFKAANDQDMVDWIIINFKSGIL  
IPTDY.....tKKSFVLRMSCeSE.....-QFLLRFSHIDDMIDWSMYLSIGIS  
KSIMEI.....inhrnipAYYYAFKIVMqNG.....HEYLIQTASSDLTEWIKMIKASKR  
?N.....ediqadnggqrnftdwwLFNECFQLVfdDG.....ERITFNAECSEEKSDWYNKLQEVVE  
;VRSLDAN.....dqviiasenektkkDLDNVLVVSTtLK.....NRYFLKFKNSKSFKTWNAAIRLSLI  
;T.....yqeevdpkrlrsDSKLWIAIYkVS.....nkIKALHVVALNELDFNTFLSCICGLVK

S  
3  
;

R

,

;

NS  
;Q

AF

A

ALM

D

SVVA

R

CH

H



I  
ASY

R

'  
AKE

KY

V  
V

/VMSIYYELE

Y

1

TTI

ST

IH

TS

AG

⟨K

F

Type of file: table

Label: Table 6

Filename: mmc12.xls

**Park et al, Supplementary Table 6:**  
**RFC scores calculated for mouse, human, Dictyostelium, C.elegans, Drosophila, zebrafish, S.Ce**

| Species  | Name                 | Score | NP_number    | Cloned and Tested Translocating? |
|----------|----------------------|-------|--------------|----------------------------------|
| Celegans | akt-2-PH1            | 57.5  | NP_001024612 | T                                |
| Celegans | akt-1-PH1            | 47.7  | NP_001023647 | T                                |
| Celegans | sec7-PH1             | 36.0  | NP_498764    | N                                |
| Celegans | mtm-5-PH1            | 5.9   | NP_508888    |                                  |
| Celegans | W09C5.5-PH1          | 3.0   | NP_493390    |                                  |
| Celegans | obr-1-PH1            | 0.7   | NP_499448    | N                                |
| Celegans | let-502-PH2          | -0.1  | NP_491440    | N                                |
| Celegans | obr-4-PH1            | -0.1  | NP_491691    |                                  |
| Celegans | F31D4.5-PH1          | -0.6  | NP_508029    |                                  |
| Celegans | gap-1-PH1            | -1.6  | NP_508404    |                                  |
| Celegans | beta1-syntrophin-PH1 | -3.0  | NP_492521    |                                  |
| Celegans | max-1-PH1            | -3.0  | NP_001041092 |                                  |
| Celegans | pdk-1-PH1            | -4.1  | NP_001024743 |                                  |
| Celegans | egl-8-PH1            | -4.3  | NP_001021348 |                                  |
| Celegans | unc-31-PH1           | -5.6  | NP_502437    |                                  |
| Celegans | gap-2-PH1            | -5.7  | NP_509594    |                                  |
| Celegans | cnt-2-PH2            | -5.9  | NP_001022838 |                                  |
| Celegans | F59A6.5-PH1          | -6.4  | NP_494921    | N                                |
| Celegans | plc-2-PH1            | -6.7  | NP_506752    |                                  |
| Celegans | soc-1-PH1            | -6.8  | NP_504250    |                                  |
| Celegans | T25E12.4-PH1         | -7.5  | NP_507240    |                                  |
| Celegans | F25H2.6-PH1          | -7.5  | NP_492762    |                                  |
| Celegans | F10G8.8-PH2          | -7.8  | NP_492655    |                                  |
| Celegans | sma-1-PH1            | -8.2  | NP_741632    |                                  |
| Celegans | pld-1-PH1            | -8.2  | NP_494939    |                                  |
| Celegans | K10B4.3-PH1          | -9.0  | NP_493664    |                                  |
| Celegans | C04D8.1-PH1          | -9.1  | NP_498877    |                                  |
| Celegans | let-502-PH1          | -9.2  | NP_491440    |                                  |
| Celegans | ani-1-PH1            | -9.5  | NP_499624    |                                  |
| Celegans | stn-2-PH1            | -9.7  | NP_001024610 |                                  |
| Celegans | exc-5-PH2            | -10.0 | NP_001023039 |                                  |
| Celegans | W02B8.2-PH1          | -10.7 | NP_496914    |                                  |
| Celegans | unc-70-PH1           | -11.2 | NP_001024053 |                                  |
| Celegans | ZK632.12-PH1         | -12.0 | NP_499183    |                                  |
| Celegans | ani-3-PH1            | -12.7 | NP_507814    |                                  |
| Celegans | cnt-2-PH1            | -13.4 | NP_001022838 |                                  |
| Celegans | F10G8.8-PH1          | -13.7 | NP_492655    |                                  |
| Celegans | cnt-1-PH1            | -13.8 | NP_001022413 |                                  |
| Celegans | F52D10.6-PH2         | -14.7 | NP_509935    |                                  |
| Celegans | tag-59-PH1           | -15.9 | NP_504599    |                                  |
| Celegans | mig-10-PH1           | -16.0 | NP_001021248 |                                  |
| Celegans | Y37D8A.25-PH1        | -16.2 | NP_001022833 |                                  |
| Celegans | dyn-1-PH1            | -16.3 | NP_001024332 |                                  |
| Celegans | phospholipase-PH1    | -16.7 | NP_501213    |                                  |
| Celegans | cnk-1-PH1            | -17.2 | NP_499274    |                                  |
| Celegans | exoc-8-PH1           | -18.1 | NP_001021703 |                                  |

|          |                  |       |              |             |
|----------|------------------|-------|--------------|-------------|
| Celegans | unc-73-PH2       | -18.2 | NP_001021501 |             |
| Celegans | F22G12.5-PH1     | -18.2 | NP_493307    |             |
| Celegans | pII-1-PH1        | -18.2 | NP_741067    |             |
| Celegans | rga-2-PH1        | -18.8 | NP_493035    |             |
| Celegans | F52D10.6-PH1     | -20.3 | NP_509935    |             |
| Celegans | Y55D9A.1-PH1     | -20.3 | NP_502417    |             |
| Celegans | tag-218-PH1      | -20.5 | NP_494707    |             |
| Celegans | chimaerin-PH1    | -20.5 | NP_497989    |             |
| Celegans | obr-3-PH1        | -20.6 | NP_741924    |             |
| Celegans | ZK1248.10-PH1    | -21.9 | NP_495156    |             |
| Celegans | T04C9.1-PH1      | -24.7 | NP_741164    |             |
| Celegans | uig-1-PH1        | -25.7 | NP_506293    |             |
| Celegans | tag-77-PH1       | -25.8 | NP_501455    |             |
| Celegans | grk-2-PH1        | -26.2 | NP_497235    |             |
| Celegans | tag-150-PH1      | -27.7 | NP_741736    |             |
| Celegans | ani-2-PH1        | -29.5 | NP_495282    |             |
| Celegans | tag-52-PH1       | -30.3 | NP_508633    |             |
| Celegans | F38B7.3-PH1      | -30.4 | NP_505929    |             |
| Celegans | Y95B8A.12-PH1    | -30.7 | NP_001032993 |             |
| Celegans | vav-1-PH1        | -30.8 | NP_001041223 |             |
| Celegans | sos-1-PH1        | -33.3 | NP_504235    |             |
| Celegans | unc-73-PH1       | -39.6 | NP_001021501 |             |
| Celegans | exc-5-PH1        | -45.4 | NP_001023039 |             |
| Danio    | zgc:152822-PH1   | 88.4  | NP_999847    | 264..388    |
| Danio    | LOC569358-PH1    | 87.2  | XP_697830    | 262..388    |
| Danio    | LOC100002753-PH1 | 86.8  | XP_001342459 | 148..258    |
| Danio    | zgc:73134-PH1    | 82.9  | NP_956016    | 264..385    |
| Danio    | LOC566849-PH1    | 65.2  | XP_695228    | 265..375    |
| Danio    | akt2-PH1         | 65.0  | NP_937789    | 6..107      |
| Danio    | akt2l-PH1        | 63.4  | NP_997980    | 6..107      |
| Danio    | LOC100002849-PH1 | 63.3  | XP_001342534 | 59..166     |
| Danio    | LOC100003513-PH1 | 51.8  | XP_001343052 | 117..212    |
| Danio    | LOC560668-PH1    | 49.2  | XP_689158    | 1211..1317  |
| Danio    | LOC556983-PH1    | 44.7  | XP_685028    | 579..674    |
| Danio    | LOC566287-PH1    | 44.0  | XP_694648    | 1105..1204  |
| Danio    | zgc:56412-PH1    | 39.0  | NP_998522    | 8..115      |
| Danio    | LOC559185-PH1    | 38.2  | XP_687595    | 19..118     |
| Danio    | LOC567921-PH1    | 36.5  | XP_696327    | 45..135     |
| Danio    | LOC100004342-PH1 | 36.1  | XP_001339977 | 73..163     |
| Danio    | LOC798084-PH1    | 30.6  | XP_001338541 | 30..127     |
| Danio    | plekha1-PH2      | 27.1  | NP_998601    | 193..284    |
| Danio    | zgc:111998-PH1   | 26.3  | NP_001017691 | 152..240    |
| Danio    | LOC556974-PH2    | 25.2  | XP_685018    | 194..285    |
| Danio    | LOC570275-PH1    | 24.5  | XP_698830    | 1278..>1329 |
| Danio    | LOC100003662-PH2 | 24.3  | XP_001343165 | 363..455    |
| Danio    | itk-PH1          | 23.9  | NP_571179    | 6..108      |
| Danio    | LOC555290-PH1    | 22.6  | XP_682853    | 1250..1343  |
| Danio    | plek-PH2         | 22.4  | NP_957135    | 247..347    |
| Danio    | LOC567753-PH2    | 22.1  | XP_696146    | 258..360    |
| Danio    | zgc:101089-PH1   | 20.1  | NP_001004646 | 1..79       |
| Danio    | LOC100004188-PH1 | 19.6  | XP_001343551 | 24..140     |

|       |                      |      |              |             |
|-------|----------------------|------|--------------|-------------|
| Danio | LOC567753-PH1        | 19.2 | XP_696146    | 12..107     |
| Danio | osbpl6-PH1           | 18.4 | NP_001005927 | 72..161     |
| Danio | zgc:63721-PH1        | 16.6 | NP_957334    | 214..305    |
| Danio | LOC100002149-PH2     | 16.3 | XP_001342004 | 257..362    |
| Danio | zgc:153787-PH1       | 14.5 | NP_001070812 | 445..531    |
| Danio | LOC569779-PH1        | 14.1 | XP_698280    | 1191..1284  |
| Danio | LOC565754-PH1        | 14.1 | XP_694119    | 61..160     |
| Danio | zgc:153920-PH1       | 14.0 | NP_001070792 | 16..122     |
| Danio | zgc:154018-PH1       | 13.9 | NP_001070226 | 15..110     |
| Danio | LOC558834-PH1        | 13.2 | XP_687193    | 562..657    |
| Danio | zgc:92634-PH1        | 12.6 | NP_001038623 | 1746..1846  |
| Danio | max1-PH1             | 12.5 | NP_001070987 | 648..735    |
| Danio | plek-PH1             | 12.2 | NP_957135    | 7..99       |
| Danio | LOC797259-PH1        | 12.0 | XP_001337715 | 2..101      |
| Danio | LOC568768-PH1        | 11.4 | XP_697212    | 325..420    |
| Danio | LOC570940-PH1        | 10.0 | XP_699568    | 216..298    |
| Danio | LOC568764-PH1        | 9.4  | XP_697207    | 112..206    |
| Danio | LOC571486-PH1        | 9.3  | XP_700175    | 137..251    |
| Danio | zgc:153733-PH1       | 9.2  | NP_001038864 | 20..108     |
| Danio | LOC567300-PH1        | 7.6  | XP_695683    | 173..261    |
| Danio | LOC564212-PH1        | 7.0  | XP_692653    | 794..902    |
| Danio | si:dkey-183c16.1-PH2 | 5.9  | XP_684366    | 525..616    |
| Danio | zgc:158404-PH1       | 5.5  | NP_001074034 | 22..143     |
| Danio | si:dkeyp-15g12.1-PH1 | 5.0  | XP_692142    | 215..306    |
| Danio | LOC562517-PH1        | 4.7  | NP_001038452 | 952..1073   |
| Danio | osbpl1a-PH1          | 4.4  | NP_001038547 | 242..336    |
| Danio | LOC100002282-PH1     | 4.4  | XP_001342108 | <37..82     |
| Danio | LOC561507-PH1        | 4.3  | XP_690002    | 61..108     |
| Danio | LOC563491-PH2        | 3.8  | XP_691944    | <1331..1357 |
| Danio | cnksr1-PH1           | 3.7  | NP_991222    | 441..537    |
| Danio | LOC792661-PH1        | 3.2  | XP_001332225 | 38..132     |
| Danio | LOC559281-PH1        | 1.9  | XP_687702    | 13..113     |
| Danio | si:ch211-193c2.2-PH1 | 1.7  | XP_693644    | 19..112     |
| Danio | LOC571767-PH2        | 1.3  | XP_700481    | 167..258    |
| Danio | LOC569779-PH2        | 1.2  | XP_698280    | 1369..1473  |
| Danio | LOC571341-PH1        | 0.9  | XP_700015    | 16..112     |
| Danio | LOC562490-PH1        | 0.7  | NP_001038451 | 212..303    |
| Danio | zgc:56306-PH1        | 0.3  | NP_956609    | 24..121     |
| Danio | LOC568653-PH1        | 0.3  | XP_697087    | 5..96       |
| Danio | LOC564823-PH1        | 0.0  | XP_693245    | 749..846    |
| Danio | LOC570918-PH1        | -0.1 | XP_699541    | 1337..1446  |
| Danio | LOC562940-PH1        | -0.2 | XP_691398    | 71..177     |
| Danio | LOC793364-PH2        | -0.8 | XP_001332264 | 658..753    |
| Danio | LOC572001-PH1        | -1.1 | XP_700746    | 23..121     |
| Danio | LOC100004413-PH1     | -1.6 | XP_001343730 | 71..177     |
| Danio | LOC560305-PH2        | -1.9 | XP_688794    | 813..908    |
| Danio | plekhf1-PH1          | -2.1 | NP_956634    | 33..128     |
| Danio | LOC559690-PH1        | -2.1 | XP_688145    | 175..259    |
| Danio | LOC559168-PH1        | -2.1 | XP_687576    | 6..118      |
| Danio | LOC794462-PH1        | -2.1 | XP_001334425 | 110..222    |
| Danio | LOC559353-PH1        | -2.2 | XP_687779    | 807..921    |

|       |                      |      |              |            |
|-------|----------------------|------|--------------|------------|
| Danio | zgc:158267-PH1       | -2.3 | NP_001073541 | 9..99      |
| Danio | LOC569229-PH1        | -2.8 | XP_697692    | 22..117    |
| Danio | LOC562683-PH1        | -3.2 | XP_691150    | 133..234   |
| Danio | LOC562468-PH1        | -3.8 | XP_690939    | 50..146    |
| Danio | LOC561110-PH1        | -3.9 | XP_689604    | 58..149    |
| Danio | LOC562124-PH1        | -3.9 | XP_690615    | 269..359   |
| Danio | LOC559690-PH3        | -4.1 | XP_688145    | 522..601   |
| Danio | LOC558831-PH1        | -4.3 | XP_687190    | 46..149    |
| Danio | zgc:76914-PH1        | -4.4 | NP_998253    | 5..116     |
| Danio | LOC798450-PH1        | -4.4 | XP_001338895 | <4..25     |
| Danio | LOC560919-PH1        | -4.5 | XP_689411    | 1..105     |
| Danio | LOC100002931-PH1     | -4.5 | XP_001342598 | 5..81      |
| Danio | LOC563283-PH1        | -4.6 | XP_691739    | 23..129    |
| Danio | LOC564545-PH1        | -4.6 | XP_692968    | 316..415   |
| Danio | LOC558931-PH1        | -4.7 | XP_687312    | 439..524   |
| Danio | LOC558931-PH3        | -4.8 | XP_687312    | 825..940   |
| Danio | skap2-PH1            | -4.9 | NP_956922    | 108..203   |
| Danio | zgc:158223-PH1       | -4.9 | NP_001073480 | 114..210   |
| Danio | LOC565122-PH1        | -4.9 | XP_693512    | 13..101    |
| Danio | LOC562503-PH1        | -5.0 | XP_690970    | 145..248   |
| Danio | LOC559690-PH2        | -5.3 | XP_688145    | 280..365   |
| Danio | stap2-PH1            | -5.4 | NP_942103    | 22..108    |
| Danio | LOC555479-PH1        | -5.6 | XP_683095    | 582..675   |
| Danio | LOC558241-PH2        | -5.6 | XP_686524    | 530..619   |
| Danio | LOC100001577-PH1     | -5.6 | XP_001341548 | <6..66     |
| Danio | LOC100003191-PH1     | -6.1 | XP_001342811 | 13..113    |
| Danio | LOC100003662-PH1     | -6.2 | XP_001343165 | 11..111    |
| Danio | zgc:63749-PH1        | -6.4 | NP_957501    | 1..88      |
| Danio | LOC100003547-PH1     | -6.4 | XP_001343082 | 82..174    |
| Danio | LOC100006857-PH1     | -6.7 | XP_001340547 | <603..669  |
| Danio | LOC566919-PH1        | -6.7 | XP_695297    | 14..114    |
| Danio | zgc:154069-PH1       | -6.8 | NP_001071273 | 5..95      |
| Danio | als2-PH1             | -6.8 | XP_685064    | <916..988  |
| Danio | zgc:77177-PH1        | -6.8 | NP_998453    | 22..106    |
| Danio | LOC566523-PH1        | -6.9 | XP_694888    | 389..473   |
| Danio | zgc:114084-PH1       | -7.1 | NP_001025384 | 217..308   |
| Danio | si:dkey-19f21.3-PH1  | -7.3 | XP_686251    | 516..625   |
| Danio | LOC555290-PH2        | -7.4 | XP_682853    | 1428..1533 |
| Danio | LOC557337-PH1        | -7.6 | XP_685483    | 414..529   |
| Danio | LOC561644-PH1        | -7.7 | XP_690149    | 96..184    |
| Danio | LOC569681-PH1        | -7.7 | XP_698171    | <5..61     |
| Danio | si:dkey-121a11.4-PH1 | -7.9 | NP_001073306 | 5..107     |
| Danio | LOC560525-PH1        | -7.9 | XP_689027    | 235..>284  |
| Danio | LOC562244-PH1        | -7.9 | XP_690730    | 463..575   |
| Danio | zgc:153779-PH2       | -8.0 | NP_001073487 | <522..552  |
| Danio | LOC560226-PH1        | -8.0 | XP_001337042 | 690..>750  |
| Danio | LOC571713-PH1        | -8.2 | XP_700421    | 81..190    |
| Danio | LOC100002149-PH1     | -8.2 | XP_001342004 | 134..230   |
| Danio | zgc:136983-PH1       | -8.3 | NP_001038715 | 269..370   |
| Danio | LOC569534-PH1        | -8.5 | XP_698022    | 145..250   |
| Danio | zgc:153917-PH1       | -8.6 | NP_001074048 | 269..359   |

|       |                      |       |              |            |
|-------|----------------------|-------|--------------|------------|
| Danio | zgc:92360-PH2        | -8.6  | NP_001002715 | 257..361   |
| Danio | LOC557123-PH1        | -8.9  | XP_685219    | 388..505   |
| Danio | LOC100003431-PH1     | -8.9  | XP_001339198 | 5..107     |
| Danio | LOC791497-PH1        | -9.2  | XP_001331742 | 22..106    |
| Danio | LOC563267-PH1        | -9.4  | XP_691722    | 455..551   |
| Danio | LOC555573-PH1        | -9.5  | XP_683216    | 43..144    |
| Danio | LOC793629-PH1        | -9.7  | XP_001333425 | <19..76    |
| Danio | LOC558931-PH2        | -9.8  | XP_687312    | <581..627  |
| Danio | LOC571767-PH3        | -9.8  | XP_700481    | 465..567   |
| Danio | LOC568912-PH1        | -10.1 | XP_697365    | 10..108    |
| Danio | LOC558831-PH2        | -10.1 | XP_687190    | 390..479   |
| Danio | LOC564814-PH1        | -10.2 | XP_693236    | 219..309   |
| Danio | LOC100004997-PH1     | -10.6 | XP_001344159 | 61..147    |
| Danio | LOC559329-PH1        | -10.8 | XP_683727    | 118..227   |
| Danio | zgc:92360-PH1        | -10.9 | NP_001002715 | 134..230   |
| Danio | LOC100004931-PH1     | -11.0 | XP_001344109 | 266..355   |
| Danio | LOC564211-PH1        | -11.1 | XP_692652    | 684..780   |
| Danio | LOC558237-PH1        | -11.1 | XP_686519    | 86..199    |
| Danio | arhgap12-PH1         | -11.2 | NP_957168    | 448..541   |
| Danio | LOC100005196-PH1     | -11.4 | XP_001344312 | <4..30     |
| Danio | LOC562404-PH1        | -11.9 | XP_690883    | 144..263   |
| Danio | LOC556641-PH1        | -12.0 | XP_684582    | 218..321   |
| Danio | plekhf2-PH1          | -12.0 | NP_956538    | 33..136    |
| Danio | LOC560514-PH1        | -12.0 | XP_689013    | 33..125    |
| Danio | LOC560078-PH1        | -12.1 | XP_688562    | 271..385   |
| Danio | zgc:158388-PH1       | -12.1 | NP_001076484 | 271..361   |
| Danio | LOC560186-PH1        | -12.2 | XP_688668    | 254..344   |
| Danio | LOC796268-PH1        | -12.3 | XP_001336583 | 89..186    |
| Danio | LOC565669-PH1        | -12.4 | XP_694028    | 14..123    |
| Danio | zgc:77233-PH1        | -12.4 | NP_998407    | 516..624   |
| Danio | LOC100000241-PH1     | -12.6 | XP_001335880 | 7..110     |
| Danio | LOC558931-PH4        | -12.8 | XP_687312    | 954..1046  |
| Danio | LOC100002454-PH1     | -12.9 | XP_001342238 | <78..135   |
| Danio | LOC569403-PH1        | -12.9 | XP_697878    | 249..359   |
| Danio | LOC556146-PH1        | -13.0 | XP_683972    | 313..395   |
| Danio | LOC567382-PH1        | -13.0 | XP_695768    | 92..201    |
| Danio | LOC561879-PH1        | -13.2 | XP_690372    | 307..394   |
| Danio | LOC792802-PH1        | -13.3 | XP_001332401 | 1037..1131 |
| Danio | si:dkey-183c16.1-PH1 | -13.3 | XP_684366    | 279..373   |
| Danio | quo-PH1              | -13.3 | NP_001004109 | 1617..1723 |
| Danio | LOC557435-PH1        | -13.5 | XP_685598    | 483..599   |
| Danio | LOC565859-PH1        | -13.6 | XP_694214    | 307..394   |
| Danio | LOC100006233-PH1     | -13.6 | XP_001345053 | 155..263   |
| Danio | LOC566207-PH1        | -13.7 | XP_694569    | 307..394   |
| Danio | zgc:77021-PH1        | -13.8 | NP_998474    | 19..105    |
| Danio | zgc:55868-PH1        | -14.1 | NP_956362    | 16..124    |
| Danio | LOC556974-PH1        | -14.1 | XP_685018    | 10..110    |
| Danio | LOC565988-PH1        | -14.3 | XP_694345    | 418..513   |
| Danio | pld2-PH1             | -14.4 | XP_694649    | 208..308   |
| Danio | LOC561366-PH1        | -14.6 | XP_689868    | 376..485   |
| Danio | LOC560226-PH2        | -14.6 | XP_001337042 | <809..849  |



|       |                  |       |              |            |
|-------|------------------|-------|--------------|------------|
| Danio | LOC100007833-PH1 | -15.0 | XP_001346187 | 70..132    |
| Danio | LOC561507-PH2    | -15.0 | XP_690002    | 393..507   |
| Danio | elmo1-PH1        | -15.0 | NP_998256    | <604..671  |
| Danio | LOC555489-PH1    | -15.0 | XP_683105    | 652..763   |
| Danio | plcg1-PH1        | -15.1 | NP_919388    | 29..140    |
| Danio | LOC557560-PH1    | -15.1 | XP_685738    | 210..>240  |
| Danio | LOC571767-PH1    | -15.3 | XP_700481    | 58..147    |
| Danio | zgc:103749-PH1   | -15.4 | NP_001006011 | 8..95      |
| Danio | veph-PH1         | -15.4 | NP_997996    | 698..798   |
| Danio | LOC563722-PH1    | -15.5 | XP_692171    | 1..>45     |
| Danio | LOC572192-PH1    | -15.6 | XP_700972    | 339..494   |
| Danio | LOC561475-PH1    | -16.0 | XP_689964    | 15..122    |
| Danio | zgc:101886-PH1   | -16.3 | NP_001007375 | 1..91      |
| Danio | LOC566479-PH1    | -16.3 | XP_694841    | 1..108     |
| Danio | LOC792246-PH1    | -16.3 | XP_001331566 | 294..406   |
| Danio | apbb1ip-PH1      | -16.3 | NP_956928    | 294..406   |
| Danio | LOC797756-PH1    | -16.5 | XP_001338219 | 3..104     |
| Danio | LOC100002649-PH1 | -16.5 | XP_001342391 | 80..159    |
| Danio | LOC100006357-PH1 | -16.5 | XP_001345128 | 80..159    |
| Danio | LOC562244-PH2    | -16.6 | XP_690730    | <789..851  |
| Danio | LOC557435-PH2    | -16.6 | XP_685598    | <680..>717 |
| Danio | plekhk1-PH1      | -16.6 | NP_001005937 | 309..415   |
| Danio | LOC798492-PH1    | -16.6 | XP_001338932 | 36..135    |
| Danio | zgc:158353-PH1   | -16.7 | NP_001038398 | 308..395   |
| Danio | LOC794414-PH1    | -16.9 | XP_001334384 | 23..110    |
| Danio | LOC100003123-PH1 | -17.1 | XP_001342754 | 1179..1281 |
| Danio | plekha1-PH1      | -17.3 | NP_998601    | 10..110    |
| Danio | LOC566659-PH1    | -17.4 | XP_695030    | 67..173    |
| Danio | zgc:114072-PH1   | -17.8 | NP_001025299 | 515..623   |
| Danio | DDEF1-PH1        | -17.9 | XP_695781    | 302..389   |
| Danio | LOC568502-PH1    | -18.1 | XP_696927    | 159..250   |
| Danio | LOC557199-PH1    | -18.4 | XP_685305    | 579..688   |
| Danio | LOC100007743-PH1 | -18.8 | XP_001346123 | 17..104    |
| Danio | LOC556000-PH1    | -19.3 | XP_683782    | 64..159    |
| Danio | LOC100001680-PH1 | -19.3 | XP_001341631 | 18..139    |
| Danio | LOC572024-PH1    | -19.3 | XP_700770    | 18..139    |
| Danio | LOC561797-PH1    | -19.4 | XP_685953    | 73..160    |
| Danio | zgc:153779-PH1   | -19.4 | NP_001073487 | 336..>399  |
| Danio | LOC558044-PH1    | -19.4 | XP_706955    | 2222..2322 |
| Danio | LOC100001532-PH1 | -19.5 | XP_001341509 | 18..112    |
| Danio | LOC558241-PH1    | -19.6 | XP_686524    | 280..392   |
| Danio | LOC560813-PH1    | -19.6 | XP_689306    | 754..840   |
| Danio | LOC568676-PH1    | -19.7 | XP_697113    | 307..>360  |
| Danio | LOC565810-PH1    | -20.2 | XP_694170    | 357..459   |
| Danio | LOC100006718-PH1 | -20.5 | XP_001345392 | 73..179    |
| Danio | LOC793730-PH1    | -20.6 | XP_001332688 | 216..327   |
| Danio | LOC100005669-PH2 | -20.7 | XP_001340801 | 418..492   |
| Danio | zgc:114084-PH2   | -20.7 | NP_001025384 | 418..492   |
| Danio | LOC555443-PH1    | -20.7 | XP_683036    | 16..124    |
| Danio | LOC561893-PH1    | -21.5 | XP_690387    | 84..170    |
| Danio | LOC558152-PH1    | -21.6 | XP_686431    | 515..607   |

|       |                     |       |              |             |
|-------|---------------------|-------|--------------|-------------|
| Danio | zgc:110459-PH1      | -21.7 | NP_001018432 | 11..98      |
| Danio | LOC796543-PH1       | -21.7 | XP_001336898 | 545..647    |
| Danio | LOC562821-PH1       | -21.8 | XP_691286    | 27..112     |
| Danio | LOC567369-PH1       | -22.0 | XP_695754    | 184..271    |
| Danio | LOC561700-PH1       | -22.4 | XP_690204    | 801..908    |
| Danio | LOC567180-PH1       | -22.4 | XP_695565    | 467..558    |
| Danio | LOC564372-PH1       | -22.5 | XP_685777    | 15..103     |
| Danio | si:dkey-27p7.2-PH1  | -22.5 | NP_001038672 | 308..395    |
| Danio | LOC557428-PH1       | -22.7 | XP_685591    | 169..277    |
| Danio | LOC572850-PH1       | -23.0 | XP_686610    | 269..367    |
| Danio | LOC555298-PH1       | -23.2 | XP_682861    | <20..86     |
| Danio | LOC560186-PH2       | -23.2 | XP_688668    | 411..489    |
| Danio | zgc:92147-PH1       | -23.5 | NP_001017914 | 27..112     |
| Danio | rock2a-PH1          | -23.5 | NP_777288    | 1142..1247  |
| Danio | LOC100006718-PH2    | -23.7 | XP_001345392 | 221..328    |
| Danio | LOC569090-PH1       | -24.0 | XP_697546    | 496..611    |
| Danio | LOC566614-PH1       | -24.3 | XP_694984    | 128..241    |
| Danio | LOC568356-PH2       | -24.3 | XP_696774    | 351..436    |
| Danio | ect2-PH1            | -24.3 | NP_001003883 | 631..759    |
| Danio | LOC569202-PH1       | -24.4 | XP_697662    | 746..862    |
| Danio | LOC100003104-PH1    | -24.8 | XP_001342736 | 31..115     |
| Danio | LOC570984-PH1       | -25.0 | XP_001342717 | 248..368    |
| Danio | LOC569320-PH1       | -25.1 | XP_697793    | 298..423    |
| Danio | LOC571004-PH1       | -25.5 | XP_699647    | 491..603    |
| Danio | quo-PH2             | -25.8 | NP_001004109 | 1699..1802  |
| Danio | zgc:92432-PH1       | -26.1 | NP_001002175 | 303..408    |
| Danio | phlda3-PH1          | -26.3 | NP_001002455 | 10..97      |
| Danio | LOC572445-PH1       | -26.8 | XP_701253    | 47..157     |
| Danio | itsn1-PH1           | -26.9 | NP_997065    | 1463..1569  |
| Danio | si:dkey-83d9.7-PH1  | -27.0 | XP_001336063 | 752..911    |
| Danio | LOC562865-PH1       | -27.0 | XP_691324    | 118..229    |
| Danio | LOC798042-PH1       | -27.0 | XP_001338493 | 269..380    |
| Danio | LOC556216-PH1       | -27.0 | XP_684060    | 485..584    |
| Danio | LOC558551-PH1       | -27.7 | XP_686873    | 422..529    |
| Danio | LOC567621-PH2       | -28.1 | XP_696014    | 1260..1419  |
| Danio | si:ch211-89p3.3-PH1 | -28.2 | NP_001038559 | 1067..1189  |
| Danio | rasgrf2-PH1         | -29.2 | XP_001335795 | 25..127     |
| Danio | LOC556834-PH1       | -29.2 | XP_684848    | 1366..1476  |
| Danio | LOC560923-PH1       | -29.3 | XP_689415    | 333..441    |
| Danio | LOC563649-PH1       | -29.4 | XP_692097    | 260..371    |
| Danio | zgc:136817-PH1      | -29.7 | NP_001035483 | 237..344    |
| Danio | LOC795760-PH1       | -29.7 | XP_001336024 | 518..631    |
| Danio | LOC793364-PH1       | -29.7 | XP_001332264 | 421..520    |
| Danio | cdc42bpb-PH1        | -29.9 | NP_001038590 | 1091..1212  |
| Danio | LOC558288-PH1       | -30.7 | XP_686581    | 439..549    |
| Danio | LOC794265-PH1       | -30.7 | XP_001334201 | 93..203     |
| Danio | LOC556727-PH1       | -31.0 | XP_684692    | 339..435    |
| Danio | LOC562264-PH1       | -31.8 | XP_690750    | <1020..1071 |
| Danio | sptb-PH1            | -32.1 | NP_571600    | 2204..2302  |
| Danio | zgc:152893-PH1      | -32.2 | NP_001038433 | 18..129     |
| Danio | LOC797187-PH1       | -32.4 | XP_001337643 | 714..819    |

|       |                      |       |              |             |
|-------|----------------------|-------|--------------|-------------|
| Danio | LOC567369-PH2        | -32.9 | XP_695754    | 352..437    |
| Danio | LOC568885-PH2        | -32.9 | XP_697339    | 478..584    |
| Danio | si:dkey-158b13.2-PH1 | -33.4 | XP_685856    | 1492..1602  |
| Danio | LOC563491-PH1        | -33.4 | XP_691944    | 1159..>1242 |
| Danio | LOC565291-PH1        | -33.4 | XP_693663    | 1313..1419  |
| Danio | LOC560461-PH1        | -33.4 | XP_688954    | 734..839    |
| Danio | LOC795770-PH1        | -33.5 | XP_001336029 | 402..515    |
| Danio | LOC799605-PH1        | -33.5 | XP_001339941 | 1024..1130  |
| Danio | LOC560319-PH1        | -33.6 | XP_688811    | 469..581    |
| Danio | LOC559907-PH1        | -33.6 | XP_688395    | 926..1061   |
| Danio | LOC559145-PH1        | -34.0 | XP_687553    | 398..505    |
| Danio | LOC559017-PH1        | -34.0 | XP_687404    | 428..535    |
| Danio | rasgrf2-PH2          | -34.4 | XP_001335795 | 477..585    |
| Danio | LOC565016-PH2        | -34.4 | XP_693419    | 477..585    |
| Danio | fgd-PH1              | -34.5 | NP_571631    | 375..475    |
| Danio | LOC560305-PH1        | -34.7 | XP_688794    | 578..676    |
| Danio | si:dkey-158b13.2-PH2 | -35.5 | XP_685856    | 2170..2282  |
| Danio | LOC562861-PH1        | -35.6 | XP_691320    | 388..489    |
| Danio | LOC567912-PH1        | -36.5 | XP_696317    | 281..403    |
| Danio | arhgef7b-PH1         | -36.7 | NP_001008624 | 447..556    |
| Danio | LOC567621-PH1        | -36.8 | XP_696014    | 454..546    |
| Danio | LOC561670-PH1        | -36.9 | XP_690171    | 436..542    |
| Danio | LOC568885-PH1        | -37.7 | XP_697339    | 25..127     |
| Danio | obscn-PH1            | -37.8 | XP_001341205 | 3334..3445  |
| Danio | LOC561825-PH1        | -38.4 | XP_690316    | 8..133      |
| Danio | LOC798516-PH1        | -38.9 | XP_001335484 | 624..729    |
| Danio | LOC557201-PH1        | -39.0 | XP_685307    | 791..917    |
| Danio | grb10-PH1            | -39.6 | NP_001004287 | 301..413    |
| Danio | LOC561276-PH1        | -40.6 | XP_689770    | 504..606    |
| Danio | LOC555340-PH1        | -40.9 | XP_682922    | 750..854    |
| Danio | LOC553493-PH1        | -41.4 | XP_707992    | 447..556    |
| Danio | LOC562032-PH1        | -43.2 | XP_690519    | 285..397    |
| Danio | LOC793086-PH1        | -44.8 | XP_001332757 | 398..506    |
| Danio | LOC569231-PH1        | -45.3 | XP_697695    | 801..935    |
| Danio | arhgef1-PH1          | -46.0 | NP_001075100 | 481..577    |
| Danio | LOC557441-PH1        | -49.7 | XP_685605    | 608..705    |
| Dicty | secG-PH1             | 34.8  | XP_637214    |             |
| Dicty | phdA-PH1             | 29.9  | XP_637977    | T           |
| Dicty | pkbA-PH1             | 27.9  | XP_646888    | T           |
| Dicty | dagA-PH1             | 24.7  | XP_638365    | T           |
| Dicty | DDBDRAFT_0219817-PH1 | 24.2  | XP_629278    |             |
| Dicty | DDBDRAFT_0217064-PH1 | 18.7  | XP_644892    |             |
| Dicty | DDB_0233285-PH1      | 18.2  | XP_643886    |             |
| Dicty | DDBDRAFT_0205671-PH1 | 17.7  | XP_641747    |             |
| Dicty | DDBDRAFT_0218225-PH1 | 17.3  | XP_641291    |             |
| Dicty | DDBDRAFT_0217777-PH1 | 15.3  | XP_643210    |             |
| Dicty | DDBDRAFT_0202904-PH1 | 14.8  | XP_645812    |             |
| Dicty | DDBDRAFT_0202066-PH1 | 14.4  | XP_647081    |             |
| Dicty | DDB_0232013-PH1      | 14.0  | XP_647308    |             |
| Dicty | DDBDRAFT_0184481-PH1 | 14.0  | XP_629529    |             |
| Dicty | DDB_0231560-PH3      | 13.6  | XP_638248    |             |

|       |                      |       |              |
|-------|----------------------|-------|--------------|
| Dicty | DDBDRAFT_0185494-PH1 | 13.3  | XP_639048    |
| Dicty | DDBDRAFT_0189208-PH1 | 12.1  | XP_635449    |
| Dicty | DDBDRAFT_0191864-PH1 | 11.3  | XP_629187    |
| Dicty | DDBDRAFT_0188916-PH1 | 11.0  | XP_635612    |
| Dicty | DDBDRAFT_0187100-PH1 | 10.3  | XP_637627    |
| Dicty | DDBDRAFT_0185955-PH1 | 9.6   | XP_638566    |
| Dicty | pdkA-PH1             | 8.4   | XP_640699    |
| Dicty | DDBDRAFT_0204119-PH1 | 8.3   | XP_640920    |
| Dicty | DDB_0229957-PH1      | 6.7   | XP_643307    |
| Dicty | DDB_0229869-PH2      | 6.4   | XP_645484    |
| Dicty | gpaC-PH1             | 6.3   | XP_637414    |
| Dicty | DDBDRAFT_0218370-PH1 | 5.6   | XP_640297    |
| Dicty | DDB_0220701-PH1      | 5.1   | XP_645246    |
| Dicty | DDBDRAFT_0205468-PH1 | 5.0   | XP_642378    |
| Dicty | DDBDRAFT_0168417-PH1 | 4.7   | XP_645597    |
| Dicty | roco6-PH1            | 3.8   | XP_641642    |
| Dicty | DDBDRAFT_0189127-PH1 | 3.5   | XP_635506    |
| Dicty | DDB_0233183-PH1      | 3.2   | XP_001134564 |
| Dicty | DDBDRAFT_0167432-PH1 | 2.7   | XP_643800    |
| Dicty | DDB_0231765-PH1      | 1.8   | XP_001134600 |
| Dicty | DDBDRAFT_0218370-PH2 | 1.5   | XP_640297    |
| Dicty | DDBDRAFT_0219504-PH1 | 1.0   | XP_635981    |
| Dicty | DDBDRAFT_0191604-PH1 | 0.8   | XP_629952    |
| Dicty | DDBDRAFT_0217683-PH1 | 0.5   | XP_643465    |
| Dicty | ugt52-PH1            | 0.3   | XP_636616    |
| Dicty | DDBDRAFT_0203449-PH1 | 0.2   | XP_642501    |
| Dicty | fimB-PH1             | -0.7  | XP_643269    |
| Dicty | DDBDRAFT_0186714-PH1 | -0.8  | XP_637967    |
| Dicty | DDBDRAFT_0189237-PH1 | -1.6  | XP_635399    |
| Dicty | pdkB-PH1             | -1.7  | XP_638523    |
| Dicty | DDBDRAFT_0168459-PH1 | -1.8  | XP_645471    |
| Dicty | DDB_0229869-PH1      | -2.9  | XP_645484    |
| Dicty | DDBDRAFT_0184540-PH1 | -3.4  | XP_629480    |
| Dicty | DDBDRAFT_0192068-PH1 | -3.6  | XP_629072    |
| Dicty | DDBDRAFT_0218209-PH1 | -4.3  | XP_641428    |
| Dicty | DDBDRAFT_0187197-PH1 | -5.0  | XP_637470    |
| Dicty | DDB_0233318-PH1      | -5.4  | XP_629202    |
| Dicty | Unc104-PH1           | -6.3  | XP_635456    |
| Dicty | DDBDRAFT_0202554-PH1 | -6.7  | XP_643663    |
| Dicty | DDBDRAFT_0205958-PH1 | -7.1  | XP_641573    |
| Dicty | DDB_0233314-PH1      | -7.1  | XP_001134615 |
| Dicty | DDBDRAFT_0219353-PH1 | -7.5  | XP_636680    |
| Dicty | vilA-PH2             | -7.8  | XP_636652    |
| Dicty | DDBDRAFT_0184166-PH1 | -8.1  | XP_629771    |
| Dicty | DDBDRAFT_0189961-PH1 | -8.8  | XP_646875    |
| Dicty | DDBDRAFT_0216772-PH1 | -9.1  | XP_646779    |
| Dicty | DDB_0233269-PH1      | -9.1  | XP_001134474 |
| Dicty | vilA-PH1             | -9.5  | XP_636652    |
| Dicty | DDB_0233184-PH1      | -9.8  | XP_001134565 |
| Dicty | DDBDRAFT_0217683-PH2 | -10.3 | XP_643465    |
| Dicty | DDB_0231560-PH1      | -10.6 | XP_638248    |

|            |                      |       |              |   |
|------------|----------------------|-------|--------------|---|
| Dicty      | DDB_0231560-PH2      | -10.6 | XP_638248    |   |
| Dicty      | DDBDRAFT_0202179-PH1 | -11.7 | XP_647402    |   |
| Dicty      | racGAP-PH1           | -13.7 | XP_629758    |   |
| Dicty      | DDBDRAFT_0168842-PH1 | -14.3 | XP_645105    |   |
| Dicty      | DDBDRAFT_0205307-PH1 | -14.7 | XP_640320    |   |
| Dicty      | DDBDRAFT_0217532-PH1 | -15.7 | XP_644103    |   |
| Dicty      | DDB_0233310-PH1      | -16.3 | XP_629755    |   |
| Dicty      | DDBDRAFT_0217791-PH1 | -17.9 | XP_643203    |   |
| Dicty      | DDBDRAFT_0191859-PH1 | -18.5 | XP_629210    |   |
| Dicty      | DDB_0233357-PH1      | -19.2 | XP_640070    |   |
| Dicty      | gxcC-PH1             | -19.3 | XP_638371    |   |
| Dicty      | DDB_0233316-PH1      | -19.5 | XP_642161    |   |
| Dicty      | DDB_0229973-PH1      | -19.8 | XP_629348    |   |
| Dicty      | DDB_0233355-PH1      | -20.0 | XP_641233    |   |
| Dicty      | roco5-PH1            | -21.1 | XP_001134523 |   |
| Dicty      | DDB_0233356-PH1      | -21.7 | XP_643485    |   |
| Dicty      | DDB_0233358-PH1      | -22.4 | XP_642829    |   |
| Dicty      | DDBDRAFT_0168965-PH1 | -23.8 | XP_644953    |   |
| Dicty      | myoM-PH1             | -28.3 | XP_629701    |   |
| Dicty      | pipA-PH1             | -31.1 | XP_629476    |   |
| Drosophila | Grp1-PH1             | 76.5  | NP_001036375 | T |
| Drosophila | Akt1-PH1             | 60.1  | NP_732113    | T |
| Drosophila | Btk29A-PH1           | 42.2  | NP_723369    | T |
| Drosophila | CG14366-PH1          | 26.9  | NP_650310    | T |
| Drosophila | CG5004-PH1           | 18.9  | NP_573195    | N |
| Drosophila | cnk-PH1              | 10.5  | NP_725671    |   |
| Drosophila | Sbf-PH1              | 8.6   | NP_731633    |   |
| Drosophila | CG12467-PH1          | 8.2   | NP_477389    |   |
| Drosophila | dos-PH1              | 7.8   | NP_728757    |   |
| Drosophila | rok-PH2              | 6.2   | NP_536796    |   |
| Drosophila | CG31772-PH1          | 5.3   | NP_608806    |   |
| Drosophila | Gap1-PH1             | 1.3   | NP_729562    |   |
| Drosophila | PKD-PH1              | 0.1   | NP_732327    |   |
| Drosophila | cenG1A-PH1           | -0.6  | NP_723850    |   |
| Drosophila | scra-PH1             | -1.6  | NP_724583    |   |
| Drosophila | CG12393-PH1          | -1.9  | NP_723149    |   |
| Drosophila | cenG1A-PH2           | -2.1  | NP_723850    |   |
| Drosophila | osp-PH1              | -2.5  | NP_523567    |   |
| Drosophila | chico-PH1            | -2.5  | NP_723540    |   |
| Drosophila | RhoGEF2-PH1          | -4.2  | NP_995869    |   |
| Drosophila | CG32560-PH1          | -4.5  | NP_573240    |   |
| Drosophila | Syn2-PH1             | -5.0  | NP_788381    |   |
| Drosophila | sl-PH1               | -5.3  | NP_476726    |   |
| Drosophila | CG1513-PH1           | -5.8  | NP_610534    |   |
| Drosophila | vap-PH1              | -6.0  | NP_996482    | N |
| Drosophila | CG31772-PH2          | -6.0  | NP_608806    |   |
| Drosophila | gek-PH1              | -8.0  | NP_523837    |   |
| Drosophila | melt-PH1             | -8.6  | NP_001014572 |   |
| Drosophila | CG6630-PH1           | -8.9  | NP_609125    |   |
| Drosophila | Lnk-PH1              | -9.3  | NP_733126    |   |
| Drosophila | CG6095-PH1           | -9.3  | NP_996299    |   |

|            |               |       |              |   |
|------------|---------------|-------|--------------|---|
| Drosophila | Syn1-PH1      | -9.7  | NP_730686    |   |
| Drosophila | shi-PH1       | -10.5 | NP_001036279 |   |
| Drosophila | rok-PH1       | -10.5 | NP_536796    |   |
| Drosophila | CG14782-PH1   | -10.6 | NP_569923    |   |
| Drosophila | RhoGEF4-PH1   | -11.2 | NP_729232    |   |
| Drosophila | siz-PH1       | -12.7 | NP_001036618 |   |
| Drosophila | Caps-PH1      | -13.2 | NP_001027031 |   |
| Drosophila | CG17360-PH1   | -13.6 | NP_650115    |   |
| Drosophila | CG9205-PH1    | -14.2 | NP_728564    |   |
| Drosophila | Osbp-PH1      | -14.4 | NP_477271    |   |
| Drosophila | Graf-PH1      | -14.7 | NP_996445    |   |
| Drosophila | blow-PH1      | -15.2 | NP_724580    |   |
| Drosophila | sif-PH2       | -15.5 | NP_996000    |   |
| Drosophila | Pk61C-PH1     | -16.0 | NP_728471    |   |
| Drosophila | CG5077-PH1    | -16.2 | NP_732500    |   |
| Drosophila | Pld-PH1       | -16.3 | NP_724472    |   |
| Drosophila | CG30372-PH1   | -16.5 | NP_001014504 |   |
| Drosophila | kst-PH1       | -16.7 | NP_995988    |   |
| Drosophila | CG7207-PH1    | -17.1 | NP_648199    |   |
| Drosophila | CG11940-PH1   | -17.6 | NP_728307    |   |
| Drosophila | cenB1A-PH1    | -17.9 | NP_732826    |   |
| Drosophila | CG30183-PH1   | -18.3 | NP_611819    |   |
| Drosophila | osp-PH2       | -18.6 | NP_523567    |   |
| Drosophila | CG5522-PH1    | -18.9 | NP_725617    |   |
| Drosophila | Cdep-PH2      | -19.4 | NP_001036676 |   |
| Drosophila | Cdep-PH1      | -20.0 | NP_001036676 |   |
| Drosophila | CG33248-PH1   | -20.8 | NP_996435    |   |
| Drosophila | vav-PH1       | -22.3 | NP_728235    |   |
| Drosophila | CG32982-PH1   | -22.4 | NP_001036349 |   |
| Drosophila | trio-PH1      | -22.5 | NP_728560    |   |
| Drosophila | Plc21C-PH1    | -22.9 | NP_995606    |   |
| Drosophila | CG31158-PH1   | -23.7 | NP_788718    |   |
| Drosophila | rtGEF-PH1     | -25.2 | NP_724258    |   |
| Drosophila | CG3799-PH1    | -25.5 | NP_730229    |   |
| Drosophila | beta-Spec-PH1 | -25.6 | NP_523388    |   |
| Drosophila | Gprk1-PH1     | -26.9 | NP_001036438 |   |
| Drosophila | CG30115-PH1   | -26.9 | NP_788403    |   |
| Drosophila | trio-PH2      | -28.2 | NP_728560    |   |
| Drosophila | sif-PH1       | -28.5 | NP_996000    |   |
| Drosophila | norpA-PH1     | -29.4 | NP_001014721 |   |
| Drosophila | CG33275-PH1   | -31.8 | NP_996017    |   |
| Drosophila | pbl-PH1       | -33.3 | NP_729308    |   |
| Drosophila | RhoGEF3-PH1   | -33.5 | NP_728517    |   |
| Drosophila | CG30440-PH1   | -35.3 | NP_610172    |   |
| Drosophila | Sos-PH1       | -43.5 | NP_476597    |   |
| Human      | PSCD3-PH1     | 90.9  | NP_004218    |   |
| Human      | PSCD1-PH1     | 89.5  | NP_059430    |   |
| Human      | PSCD2-PH1     | 87.1  | NP_004219    |   |
| Human      | PSCD4-PH1     | 79.4  | NP_037517    | T |
| Human      | AKT1-PH1      | 70.2  | NP_001014432 |   |
| Human      | AKT3-PH1      | 68.0  | NP_859029    |   |

|       |               |      |              |   |
|-------|---------------|------|--------------|---|
| Human | AKT2-PH1      | 64.3 | NP_001617    |   |
| Human | LOC653583-PH1 | 54.8 | XP_933317    | T |
| Human | PHLDB2-PH1    | 54.8 | NP_665696    | T |
| Human | RASA2-PH1     | 48.1 | NP_006497    |   |
| Human | PHLDB1-PH1    | 47.7 | NP_055972    |   |
| Human | TEC-PH1       | 47.1 | NP_003206    |   |
| Human | RASA3-PH1     | 47.0 | NP_031394    |   |
| Human | GAB1-PH1      | 45.9 | NP_002030    |   |
| Human | BTK-PH1       | 45.6 | NP_000052    |   |
| Human | GAB2-PH1      | 41.9 | NP_536739    |   |
| Human | GAB3-PH1      | 40.2 | NP_542179    | T |
| Human | OSBPL3-PH1    | 38.9 | NP_663162    |   |
| Human | ITK-PH1       | 36.1 | NP_005537    |   |
| Human | GAB4-PH1      | 35.3 | NP_001032903 |   |
| Human | PLEKHA1-PH2   | 33.5 | NP_001001974 |   |
| Human | SH3BP2-PH1    | 33.3 | NP_003014    |   |
| Human | OSBPL6-PH1    | 33.1 | NP_665682    | T |
| Human | DAPP1-PH1     | 31.5 | NP_055210    |   |
| Human | DAPP1-PH2     | 31.5 | NP_055210    |   |
| Human | PLEK2-PH1     | 28.2 | NP_057529    |   |
| Human | PLEKHA2-PH2   | 26.5 | XP_945579    |   |
| Human | OSBPL7-PH1    | 23.5 | NP_665741    |   |
| Human | PLEK2-PH2     | 22.9 | NP_057529    |   |
| Human | BMX-PH1       | 22.0 | NP_975010    |   |
| Human | PDPK1-PH1     | 21.3 | NP_112558    |   |
| Human | DEF6-PH1      | 18.3 | NP_071330    | N |
| Human | RASA1-PH1     | 17.9 | NP_002881    | N |
| Human | MYO10-PH2     | 17.5 | NP_036466    |   |
| Human | C10orf81-PH1  | 16.4 | NP_079165    |   |
| Human | LOC730393-PH1 | 16.0 | XP_001125992 |   |
| Human | PLEK-PH1      | 13.7 | NP_002655    |   |
| Human | CNKSR2-PH1    | 13.0 | NP_055742    |   |
| Human | PLEK-PH2      | 12.1 | NP_002655    |   |
| Human | PLEKHH2-PH1   | 10.7 | NP_742066    |   |
| Human | SBF2-PH1      | 10.4 | NP_112224    |   |
| Human | PLEKHA6-PH1   | 9.4  | NP_055750    |   |
| Human | PHLPP-PH1     | 9.0  | NP_919431    |   |
| Human | CENTD1-PH1    | 8.9  | NP_056045    |   |
| Human | IRS4-PH1      | 8.6  | NP_003595    |   |
| Human | PLEKHA7-PH1   | 8.5  | NP_778228    |   |
| Human | MYO10-PH1     | 8.1  | NP_036466    |   |
| Human | FGD6-PH2      | 7.7  | NP_060821    |   |
| Human | SBF1-PH1      | 7.7  | NP_002963    | T |
| Human | IRS2-PH1      | 7.1  | NP_003740    |   |
| Human | ANLN-PH1      | 7.1  | NP_061155    |   |
| Human | ARHGAP24-PH1  | 6.8  | NP_001020787 |   |
| Human | FAM109A-PH1   | 6.3  | NP_653272    |   |
| Human | PLEKHH1-PH1   | 6.2  | NP_065766    | N |
| Human | DOCK11-PH1    | 5.4  | NP_653259    |   |
| Human | CTGLF4-PH1    | 4.5  | NP_001071153 |   |
| Human | CENTA2-PH2    | 3.8  | NP_060874    |   |

|       |               |      |              |   |
|-------|---------------|------|--------------|---|
| Human | PLEKHA5-PH1   | 3.5  | NP_061885    |   |
| Human | OSBPL1A-PH1   | 2.8  | NP_579802    | N |
| Human | PLEKHH1-PH2   | 1.7  | NP_065766    |   |
| Human | TBC1D2-PH1    | 1.6  | NP_060891    |   |
| Human | CNKS1-1-PH1   | 1.0  | NP_006305    |   |
| Human | ROCK1-PH2     | 0.9  | NP_005397    |   |
| Human | PLEKHH2-PH2   | 0.8  | NP_742066    |   |
| Human | LOC727758-PH2 | 0.5  | XP_001125808 |   |
| Human | SWAP70-PH1    | 0.2  | NP_055870    |   |
| Human | CENTA1-PH2    | -0.4 | NP_006860    |   |
| Human | PIP3-E-PH1    | -1.1 | NP_056368    |   |
| Human | FGD5-PH2      | -1.2 | NP_689749    |   |
| Human | FLJ44817-PH1  | -1.6 | XP_943145    |   |
| Human | CTGLF1-PH2    | -1.6 | NP_597703    |   |
| Human | PLEKHB2-PH1   | -1.6 | NP_001026876 |   |
| Human | FLJ32810-PH1  | -2.0 | XP_001127637 |   |
| Human | ARHGAP27-PH1  | -2.5 | NP_954976    |   |
| Human | IRS1-PH1      | -2.6 | NP_005535    |   |
| Human | PLCB1-PH1     | -2.7 | NP_877398    |   |
| Human | KIAA1975-PH2  | -2.8 | XP_942322    |   |
| Human | MYO10-PH3     | -2.9 | NP_036466    |   |
| Human | SNTG2-PH1     | -3.1 | NP_061841    |   |
| Human | DOK2-PH1      | -3.1 | NP_003965    |   |
| Human | CTGLF1-PH1    | -3.2 | NP_597703    |   |
| Human | PLCD3-PH1     | -3.2 | NP_588614    |   |
| Human | SNTG1-PH1     | -3.3 | NP_061840    |   |
| Human | CENTD3-PH1    | -3.3 | NP_071926    |   |
| Human | PLEKHH3-PH1   | -3.3 | NP_079203    |   |
| Human | CENTG2-PH2    | -3.5 | NP_001032208 |   |
| Human | PLEKHK1-PH1   | -3.6 | NP_660350    |   |
| Human | ARHGAP25-PH1  | -3.7 | NP_001007232 | N |
| Human | LOC728005-PH2 | -4.1 | XP_001127181 |   |
| Human | PHLDA3-PH1    | -4.3 | NP_036528    |   |
| Human | FLJ21438-PH1  | -4.6 | NP_075055    |   |
| Human | DGKK-PH1      | -4.9 | NP_001013764 |   |
| Human | FGD2-PH2      | -5.0 | NP_775829    |   |
| Human | DGKD-PH1      | -5.0 | NP_690618    |   |
| Human | DOCK9-PH1     | -5.2 | NP_056111    |   |
| Human | CENTG2-PH1    | -5.2 | NP_001032208 |   |
| Human | CENTD3-PH2    | -5.3 | NP_071926    |   |
| Human | CENTD2-PH3    | -5.3 | NP_001035207 |   |
| Human | CENTD2-PH1    | -5.5 | NP_001035207 |   |
| Human | CENTB2-PH1    | -5.5 | NP_036419    |   |
| Human | FARP2-PH2     | -5.8 | NP_055623    |   |
| Human | M-RIP-PH1     | -6.2 | NP_055949    |   |
| Human | PLEKHM2-PH1   | -6.3 | XP_943674    |   |
| Human | SKAP2-PH1     | -6.4 | NP_003921    |   |
| Human | PLEKHA3-PH1   | -6.4 | NP_061964    |   |
| Human | OSBPL9-PH1    | -6.8 | NP_683707    |   |
| Human | DNM3-PH1      | -6.8 | NP_056384    |   |
| Human | PLEKHQ1-PH1   | -7.0 | NP_079477    |   |



|       |                   |       |              |
|-------|-------------------|-------|--------------|
| Human | OSBPL10-PH1       | -7.2  | NP_060254    |
| Human | CENTA2-PH1        | -7.5  | NP_060874    |
| Human | RTKN-PH1          | -7.9  | NP_001015055 |
| Human | PLCB3-PH1         | -8.0  | NP_000923    |
| Human | PLEKHA4-PH1       | -8.1  | NP_065955    |
| Human | DGKH-PH1          | -8.2  | NP_690874    |
| Human | CENTB1-PH1        | -8.2  | NP_055531    |
| Human | PRKD2-PH1         | -8.3  | NP_001073351 |
| Human | ARHGAP26-PH1      | -8.4  | NP_055886    |
| Human | CENTG3-PH1        | -8.5  | NP_114152    |
| Human | ARHGAP15-PH1      | -8.5  | NP_060930    |
| Human | CENTA1-PH1        | -8.7  | NP_006860    |
| Human | PRKD3-PH1         | -8.7  | NP_005804    |
| Human | APPL1-PH1         | -8.7  | NP_036228    |
| Human | PLEKHO1-PH1       | -9.0  | NP_057358    |
| Human | FAM109B-PH1       | -9.1  | NP_001002034 |
| Human | FGD3-PH2          | -9.6  | NP_149077    |
| Human | CENTB5-PH1        | -10.0 | NP_085152    |
| Human | PLEKHA2-PH1       | -10.1 | XP_945579    |
| Human | PLCH2-PH1         | -10.1 | NP_055453    |
| Human | PLEKHF2-PH1       | -10.4 | NP_078889    |
| Human | CENTD2-PH2        | -10.4 | NP_001035207 |
| Human | AFAP1-PH2         | -10.5 | NP_067651    |
| Human | ARHGAP21-PH1      | -10.6 | NP_065875    |
| Human | DKFZP434B0335-PH1 | -10.6 | NP_056210    |
| Human | OSBPL11-PH1       | -10.7 | NP_073613    |
| Human | PSD-PH1           | -10.8 | NP_002770    |
| Human | LOC389072-PH1     | -10.9 | NP_001073944 |
| Human | RASAL1-PH1        | -10.9 | NP_004649    |
| Human | ELMO2-PH1         | -11.2 | NP_877496    |
| Human | CADPS-PH1         | -11.2 | NP_003707    |
| Human | PLCB4-PH1         | -11.4 | NP_877949    |
| Human | AFAP1L1-PH2       | -11.6 | NP_689619    |
| Human | KIAA1975-PH1      | -12.1 | XP_942322    |
| Human | CIT-PH1           | -12.2 | NP_009105    |
| Human | SYNGAP1-PH1       | -12.3 | NP_006763    |
| Human | PLEKHA8-PH1       | -12.7 | NP_116028    |
| Human | PSD3-PH1          | -12.7 | NP_996792    |
| Human | CENTG1-PH2        | -12.7 | NP_055585    |
| Human | PLEKHG2-PH1       | -12.7 | NP_073746    |
| Human | PLCG1-PH1         | -12.8 | NP_002651    |
| Human | APPL2-PH1         | -13.0 | NP_060641    |
| Human | AFAP1L1-PH1       | -13.6 | NP_689619    |
| Human | PLEKHF1-PH1       | -13.6 | NP_077286    |
| Human | PHLDA2-PH1        | -13.7 | NP_003302    |
| Human | DOK4-PH1          | -13.9 | NP_060580    |
| Human | PLEKHJ1-PH1       | -14.2 | NP_060519    |
| Human | DNM1-PH1          | -14.3 | NP_004399    |
| Human | PLEKHB1-PH1       | -14.3 | NP_067023    |
| Human | ABR-PH1           | -14.5 | NP_068781    |
| Human | CADPS2-PH1        | -14.5 | NP_060424    |

|       |               |       |              |
|-------|---------------|-------|--------------|
| Human | DAB2IP-PH1    | -14.6 | NP_115941    |
| Human | ARHGAP10-PH1  | -14.8 | NP_078881    |
| Human | FARP1-PH2     | -14.9 | NP_005757    |
| Human | RALGPS2-PH1   | -15.2 | NP_689876    |
| Human | CENTD1-PH3    | -15.4 | NP_056045    |
| Human | FGD6-PH1      | -15.4 | NP_060821    |
| Human | OPHN1-PH1     | -15.4 | NP_002538    |
| Human | ARHGEF5-PH1   | -15.5 | NP_005426    |
| Human | DEPDC2-PH1    | -15.6 | NP_079446    |
| Human | VEPH1-PH1     | -15.7 | NP_078897    |
| Human | TRIOBP-PH1    | -15.8 | NP_619538    |
| Human | FGD4-PH2      | -16.0 | NP_640334    |
| Human | PLEKHG3-PH1   | -16.1 | NP_056364    |
| Human | AFAP1-PH1     | -16.1 | NP_067651    |
| Human | FGD5-PH1      | -16.2 | NP_689749    |
| Human | M-RIP-PH2     | -16.2 | NP_055949    |
| Human | DNM2-PH1      | -16.3 | NP_001005362 |
| Human | CENTG1-PH1    | -16.7 | NP_055585    |
| Human | ELMO1-PH1     | -17.0 | NP_001034548 |
| Human | ADRBK2-PH1    | -17.2 | NP_005151    |
| Human | FGD1-PH2      | -17.5 | NP_004454    |
| Human | ARHGAP12-PH1  | -17.6 | NP_060757    |
| Human | PLCB2-PH1     | -17.8 | NP_004564    |
| Human | DOK6-PH1      | -17.9 | NP_689934    |
| Human | ARHGAP9-PH1   | -18.0 | NP_115885    |
| Human | ARHGEF19-PH1  | -18.1 | NP_694945    |
| Human | CENTD1-PH2    | -18.1 | NP_056045    |
| Human | CDC42BPG-PH1  | -18.1 | NP_059995    |
| Human | PLCH1-PH1     | -18.1 | NP_055811    |
| Human | DDEF1-PH1     | -18.2 | NP_060177    |
| Human | PLEKHA1-PH1   | -18.4 | NP_001001974 |
| Human | SNTB2-PH1     | -18.4 | NP_006741    |
| Human | TIAM2-PH2     | -18.4 | NP_036586    |
| Human | DOK7-PH1      | -18.9 | NP_775931    |
| Human | SPTBN5-PH1    | -19.2 | NP_057726    |
| Human | BCR-PH2       | -19.3 | NP_067585    |
| Human | ARHGAP22-PH1  | -19.6 | NP_067049    |
| Human | OSBP2-PH1     | -19.8 | NP_110385    |
| Human | ALS2-PH1      | -19.9 | NP_065970    |
| Human | PREX1-PH1     | -19.9 | NP_065871    |
| Human | OSBP-PH1      | -20.0 | NP_002547    |
| Human | RASAL2-PH1    | -20.4 | NP_733793    |
| Human | PLCD1-PH1     | -20.5 | NP_006216    |
| Human | COL4A3BP-PH1  | -20.7 | NP_112729    |
| Human | PLEKHN1-PH2   | -20.8 | NP_115505    |
| Human | RALGPS1-PH1   | -20.8 | NP_055451    |
| Human | NGEF-PH1      | -21.0 | NP_062824    |
| Human | RASA4-PH1     | -21.1 | NP_008920    |
| Human | LOC727758-PH1 | -21.2 | XP_001125808 |
| Human | TRIO-PH2      | -21.3 | NP_009049    |
| Human | SH2B3-PH1     | -21.3 | NP_005466    |

|       |               |       |              |
|-------|---------------|-------|--------------|
| Human | PSD2-PH1      | -21.5 | NP_115665    |
| Human | IQSEC1-PH1    | -21.6 | NP_055684    |
| Human | PLCL2-PH1     | -22.0 | NP_055999    |
| Human | DDEF2-PH1     | -22.1 | NP_003878    |
| Human | PLD2-PH1      | -22.2 | NP_002654    |
| Human | PRKD1-PH1     | -22.2 | NP_002733    |
| Human | SPTBN4-PH1    | -22.3 | NP_066022    |
| Human | ARHGAP23-PH1  | -22.5 | XP_941689    |
| Human | APBB1IP-PH1   | -22.5 | NP_061916    |
| Human | DDEF1-PH1     | -22.5 | NP_060952    |
| Human | OSBPL8-PH1    | -22.7 | NP_001003712 |
| Human | SGEF-PH1      | -23.3 | NP_056410    |
| Human | ARHGEF16-PH1  | -23.7 | NP_055263    |
| Human | TIAM1-PH2     | -23.7 | NP_003244    |
| Human | CDC42BPA-PH1  | -23.9 | NP_003598    |
| Human | FLJ21767-PH1  | -24.0 | XP_001132988 |
| Human | OSBPL5-PH1    | -24.0 | NP_065947    |
| Human | AFAP1L2-PH1   | -24.0 | NP_001001936 |
| Human | SKAP1-PH1     | -24.2 | NP_003717    |
| Human | RAPH1-PH1     | -24.3 | NP_998754    |
| Human | PLCD4-PH1     | -24.3 | NP_116115    |
| Human | SPTB-PH1      | -24.3 | NP_001020029 |
| Human | IQSEC2-PH1    | -24.7 | NP_055890    |
| Human | LFDH-PH1      | -24.7 | NP_001071174 |
| Human | PSD4-PH1      | -25.1 | NP_036587    |
| Human | SH2B2-PH1     | -25.3 | NP_066189    |
| Human | ITSN1-PH1     | -25.5 | NP_003015    |
| Human | SNTA1-PH1     | -26.0 | NP_003089    |
| Human | ABR-PH2       | -26.2 | NP_068781    |
| Human | CDC42BPB-PH1  | -26.4 | NP_006026    |
| Human | FLJ10357-PH1  | -26.5 | NP_060541    |
| Human | PLEKHM1-PH1   | -26.8 | NP_055613    |
| Human | C9orf100-PH1  | -27.0 | NP_116207    |
| Human | BCR-PH1       | -27.0 | NP_067585    |
| Human | SH2B1-PH1     | -27.2 | NP_056318    |
| Human | LOC440456-PH1 | -27.4 | XP_945133    |
| Human | EXOC8-PH1     | -27.7 | NP_787072    |
| Human | PLEKHN1-PH1   | -27.9 | NP_115505    |
| Human | FGD2-PH1      | -27.9 | NP_775829    |
| Human | PLD1-PH1      | -28.2 | NP_002653    |
| Human | PLCL1-PH1     | -28.3 | NP_006217    |
| Human | ECT2-PH1      | -28.7 | NP_060568    |
| Human | ADRBK1-PH1    | -28.9 | NP_001610    |
| Human | OBSCN-PH1     | -29.0 | NP_443075    |
| Human | SPTBN1-PH1    | -29.3 | NP_003119    |
| Human | ITSN2-PH1     | -29.9 | NP_006268    |
| Human | MCF2L2-PH1    | -30.0 | NP_055893    |
| Human | SNTB1-PH1     | -30.0 | NP_066301    |
| Human | ARHGEF6-PH1   | -30.0 | NP_004831    |
| Human | FGD4-PH1      | -30.0 | NP_640334    |
| Human | NET1-PH1      | -30.1 | NP_001040625 |

|       |              |       |              |   |
|-------|--------------|-------|--------------|---|
| Human | KIAA1909-PH1 | -30.1 | NP_443141    |   |
| Human | GEFT-PH1     | -31.1 | NP_891992    |   |
| Human | PLCG2-PH1    | -31.2 | NP_002652    |   |
| Human | ARHGEF9-PH1  | -31.7 | NP_056000    |   |
| Human | IQSEC3-PH1   | -31.7 | NP_056047    |   |
| Human | CENTD1-PH4   | -31.8 | NP_056045    |   |
| Human | DOK5-PH1     | -31.9 | NP_060901    |   |
| Human | FARP1-PH1    | -32.1 | NP_005757    |   |
| Human | ROCK2-PH1    | -32.1 | NP_004841    |   |
| Human | FGD3-PH1     | -32.4 | NP_149077    |   |
| Human | PLEKHG4-PH1  | -32.5 | NP_056247    |   |
| Human | RASGRF2-PH1  | -33.0 | NP_008840    |   |
| Human | FARP2-PH1    | -33.1 | NP_055623    |   |
| Human | PLEKHG1-PH1  | -33.5 | NP_001025055 |   |
| Human | KALRN-PH2    | -33.7 | NP_001019831 |   |
| Human | RASGRF2-PH2  | -35.0 | NP_008840    |   |
| Human | AFAP1L2-PH2  | -35.8 | NP_001001936 |   |
| Human | TRIO-PH1     | -35.9 | NP_009049    |   |
| Human | TIAM1-PH1    | -36.0 | NP_003244    |   |
| Human | KALRN-PH1    | -36.0 | NP_001019831 |   |
| Human | ARHGEF4-PH1  | -36.7 | NP_127462    |   |
| Human | SPTBN2-PH1   | -36.8 | NP_008877    |   |
| Human | GRB7-PH1     | -37.0 | NP_001025173 |   |
| Human | TIAM2-PH1    | -37.7 | NP_036586    |   |
| Human | ARHGEF15-PH1 | -37.8 | NP_776089    |   |
| Human | RASGRF1-PH1  | -37.9 | NP_002882    |   |
| Human | ARHGEF7-PH1  | -38.5 | NP_663788    |   |
| Human | VAV2-PH1     | -39.2 | NP_003362    |   |
| Human | PLEKHG6-PH1  | -39.9 | NP_060643    |   |
| Human | PLEKHG5-PH1  | -41.1 | NP_001036130 |   |
| Human | GRB14-PH1    | -41.7 | NP_004481    |   |
| Human | SPATA13-PH1  | -41.7 | NP_694568    |   |
| Human | CENTD2-PH4   | -41.8 | NP_001035207 | N |
| Human | ARHGEF2-PH1  | -44.1 | NP_004714    |   |
| Human | ARHGEF18-PH1 | -44.9 | NP_056133    |   |
| Human | ROCK1-PH1    | -45.7 | NP_005397    |   |
| Human | GRB10-PH1    | -46.1 | NP_001001555 |   |
| Human | FGD1-PH1     | -46.9 | NP_004454    |   |
| Human | MCF2-PH1     | -47.2 | NP_005360    |   |
| Human | VAV1-PH1     | -48.8 | NP_005419    |   |
| Human | MCF2L-PH1    | -48.8 | NP_079255    |   |
| Human | VAV3-PH1     | -49.1 | NP_006104    |   |
| Human | AKAP13-PH1   | -50.5 | NP_006729    |   |
| Human | SOS2-PH1     | -55.9 | NP_008870    |   |
| Human | SOS1-PH1     | -57.6 | NP_005624    |   |
| Mouse | Pscd3-PH1    | 89.6  | NP_035312    | T |
| Mouse | Pscd1-PH1    | 88.1  | NP_035310    | T |
| Mouse | Pscd2-PH1    | 87.1  | NP_035311    | T |
| Mouse | Pscd4-PH1    | 78.1  | NP_082471    |   |
| Mouse | Akt1-PH1     | 70.2  | NP_033782    | T |
| Mouse | Akt3-PH1     | 68.0  | NP_035915    | T |

|       |                   |      |              |   |
|-------|-------------------|------|--------------|---|
| Mouse | Akt2-PH1          | 64.3 | NP_031460    | T |
| Mouse | Phldb2-PH1        | 55.1 | NP_700461    |   |
| Mouse | LOC232970-PH1     | 53.9 | XP_993564    |   |
| Mouse | Phldb1-PH1        | 53.7 | NP_705765    | T |
| Mouse | Rasa3-PH1         | 48.2 | NP_033051    | T |
| Mouse | TEC-PH1           | 47.9 | BAE23957     | T |
| Mouse | Rasa2-PH1         | 46.9 | NP_444498    | T |
| Mouse | Gab1-PH1          | 45.4 | NP_067331    | T |
| Mouse | Btk-PH1           | 44.8 | NP_038510    | T |
| Mouse | Gab3-PH1          | 43.1 | NP_853615    |   |
| Mouse | Gab2-PH1          | 41.2 | NP_034378    | T |
| Mouse | Itk-PH1           | 37.8 | NP_034713    | T |
| Mouse | Plekha1-PH1       | 33.5 | NP_598703    | T |
| Mouse | Sh3bp2-PH1        | 33.2 | NP_036023    | T |
| Mouse | Osbp16-PH1        | 33.1 | NP_663500    |   |
| Mouse | Osbp13-PH1        | 32.0 | NP_082157    | T |
| Mouse | Plek2-PH1         | 32.0 | NP_038766    | T |
| Mouse | Dapp1-PH1         | 30.2 | NP_036062    | T |
| Mouse | Plekha2-PH2       | 29.4 | NP_112547    | T |
| Mouse | Plek2-PH2         | 24.1 | NP_038766    | T |
| Mouse | Osbp17-PH1        | 23.9 | NP_001074903 | T |
| Mouse | Bmx-PH1           | 21.3 | NP_033889    |   |
| Mouse | PDPK1-PH1         | 21.3 | NM_011062    | T |
| Mouse | Rasa1-PH1         | 18.5 | NP_663427    |   |
| Mouse | Myo10-PH1         | 17.6 | NP_062345    | T |
| Mouse | Def6-PH1          | 17.2 | NP_081461    |   |
| Mouse | Plek-PH1          | 16.0 | NP_062422    | T |
| Mouse | Cnksr2-PH1        | 13.0 | NP_808419    | T |
| Mouse | 9930023K05Rik-PH1 | 12.0 | NP_766229    |   |
| Mouse | Plekha6-PH1       | 10.5 | NP_891846    |   |
| Mouse | Plekhh2-PH1       | 10.0 | NP_808274    |   |
| Mouse | Sbf1-PH1          | 9.7  | NP_001074499 |   |
| Mouse | Sbf2-PH1          | 9.2  | XP_982134    |   |
| Mouse | Fgd6-PH2          | 8.3  | NP_444302    | T |
| Mouse | Myo10-PH2         | 8.1  | NP_062345    | T |
| Mouse | Phlpp-PH1         | 8.0  | XP_990044    | T |
| Mouse | Plek-PH2          | 7.9  | NP_062422    | N |
| Mouse | Irs2-PH1          | 7.1  | NP_001074681 |   |
| Mouse | Plekha7-PH1       | 7.0  | NP_766331    |   |
| Mouse | Arhgap24-PH1      | 6.0  | NP_083546    |   |
| Mouse | Irs4-PH1          | 5.4  | NP_034702    |   |
| Mouse | Dock11-PH1        | 5.4  | NP_001009947 |   |
| Mouse | A230106M15Rik-PH1 | 5.1  | NP_780683    |   |
| Mouse | Tbc1d2-PH1        | 5.0  | NP_941066    |   |
| Mouse | Anln-PH1          | 4.9  | NP_082666    |   |
| Mouse | LOC634512-PH1     | 4.5  | XP_914353    |   |
| Mouse | Plekhh1-PH1       | 4.3  | XP_997012    |   |
| Mouse | Tbc1d2b-PH1       | 3.7  | NP_919315    |   |
| Mouse | Osbp1a-PH1        | 3.2  | NP_997413    |   |
| Mouse | A130090K04Rik-PH1 | 2.9  | NP_001028563 |   |
| Mouse | Plekha5-PH1       | 2.3  | NP_659169    | N |

|       |                   |      |              |   |
|-------|-------------------|------|--------------|---|
| Mouse | 2610034M16Rik-PH1 | 2.2  | NP_081277    | N |
| Mouse | Rock1-PH2         | 2.1  | NP_033097    |   |
| Mouse | Plekhh1-PH2       | 2.0  | XP_997012    |   |
| Mouse | 3830431G21Rik-PH1 | 0.8  | XP_997509    |   |
| Mouse | Centd1-PH1        | 0.2  | XP_001001345 |   |
| Mouse | Plekhh2-PH1       | 0.1  | NP_663491    | N |
| Mouse | Irs3-PH1          | -0.2 | NP_034701    |   |
| Mouse | Arhgap27-PH1      | -0.5 | NP_598476    |   |
| Mouse | Swap70-PH1        | -1.7 | NP_033328    | N |
| Mouse | Plcb1-PH1         | -1.9 | NP_062651    |   |
| Mouse | Phlpp1-PH1        | -2.1 | XP_001003814 |   |
| Mouse | Dock10-PH1        | -2.2 | XP_896500    |   |
| Mouse | LOC630691-PH1     | -2.2 | XP_909376    |   |
| Mouse | Fgd2-PH2          | -2.5 | NP_038738    |   |
| Mouse | Plekho1-PH1       | -2.6 | NP_075809    | N |
| Mouse | Irs1-PH1          | -2.6 | NP_034700    | N |
| Mouse | Centg2-PH2        | -2.6 | NP_001032213 |   |
| Mouse | Plekhhq1-PH1      | -2.7 | NP_694759    |   |
| Mouse | Plcb3-PH1         | -2.7 | NP_032900    |   |
| Mouse | Cnksr1-PH1        | -2.8 | NP_001074516 |   |
| Mouse | LOC637116-PH1     | -2.8 | XP_917803    |   |
| Mouse | Centd3-PH2        | -2.8 | NP_631945    |   |
| Mouse | Myo10-PH3         | -2.9 | NP_062345    | N |
| Mouse | Farp2-PH2         | -3.2 | NP_663494    |   |
| Mouse | Centd3-PH1        | -3.3 | NP_631945    |   |
| Mouse | Centa2-PH2        | -3.4 | NP_742145    |   |
| Mouse | Plekhh3-PH1       | -4.2 | NP_666142    |   |
| Mouse | Phlda3-PH1        | -4.3 | NP_038778    |   |
| Mouse | Rasal1-PH1        | -4.5 | NP_038860    | N |
| Mouse | A430107D22Rik-PH1 | -4.7 | NP_848900    |   |
| Mouse | Sntg2-PH1         | -4.8 | NP_766539    |   |
| Mouse | CENTD2-PH1        | -4.9 | NM_027180    | N |
| Mouse | DGKD-PH1          | -5.0 | XM_906228    | N |
| Mouse | Centb1-PH1        | -5.1 | NP_722483    |   |
| Mouse | Fgd5-PH2          | -5.4 | NP_766319    |   |
| Mouse | Sntg1-PH2         | -5.6 | NP_081947    |   |
| Mouse | Dok2-PH1          | -5.7 | NP_034201    |   |
| Mouse | 9030420J04Rik-PH1 | -5.9 | XP_996933    |   |
| Mouse | C920005C14Rik-PH1 | -6.0 | NP_796365    |   |
| Mouse | Arhgap25-PH1      | -6.0 | NP_780685    |   |
| Mouse | Centa1-PH1        | -6.2 | NP_766311    |   |
| Mouse | 9430067K14Rik-PH1 | -6.3 | NP_001034582 |   |
| Mouse | Dock9-PH1         | -6.5 | NP_001074508 |   |
| Mouse | LOC670309-PH1     | -6.5 | XP_985681    |   |
| Mouse | Centb2-PH1        | -6.5 | NP_084414    |   |
| Mouse | Dgkh-PH1          | -6.7 | NP_001074805 |   |
| Mouse | Plcd3-PH1         | -6.8 | NP_690026    |   |
| Mouse | Centa2-PH1        | -6.9 | NP_742145    |   |
| Mouse | 2210010N04Rik-PH1 | -6.9 | NP_081686    |   |
| Mouse | Plcb2-PH1         | -6.9 | NP_808236    |   |
| Mouse | Skap2-PH1         | -7.0 | NP_061243    | N |

|       |               |       |              |   |
|-------|---------------|-------|--------------|---|
| Mouse | Centg3-PH1    | -7.5  | NP_631892    |   |
| Mouse | Plekha4-PH1   | -7.6  | XP_001003564 |   |
| Mouse | Dgkk-PH1      | -7.7  | NP_808582    |   |
| Mouse | Prkcn-PH1     | -8.0  | NP_083515    |   |
| Mouse | Dnm3-PH1      | -8.2  | NP_001033708 |   |
| Mouse | Plekha3-PH1   | -8.4  | NP_112546    | N |
| Mouse | Arhgap26-PH1  | -8.4  | NP_780373    |   |
| Mouse | Plekha1-PH1   | -8.6  | NP_038774    | N |
| Mouse | Plcg1-PH2     | -8.7  | NP_067255    |   |
| Mouse | Appl1-PH1     | -8.7  | NP_660256    |   |
| Mouse | Elmo2-PH1     | -8.8  | NP_997589    |   |
| Mouse | Ophn1-PH1     | -9.2  | NP_443208    | N |
| Mouse | Arhgef10-PH1  | -9.3  | NP_766339    |   |
| Mouse | Centa1-PH2    | -9.4  | NP_766311    |   |
| Mouse | Arhgap15-PH1  | -9.4  | NP_001020548 |   |
| Mouse | Sntg1-PH1     | -9.5  | NP_081947    |   |
| Mouse | Plekha2-PH1   | -9.6  | XP_985312    | N |
| Mouse | Osbpl10-PH1   | -9.7  | XP_990315    |   |
| Mouse | AA536749-PH1  | -9.7  | NP_957697    | N |
| Mouse | LOC666407-PH1 | -9.7  | XP_988727    |   |
| Mouse | Centd2-PH2    | -9.8  | NP_001035201 |   |
| Mouse | Plekha2-PH1   | -9.9  | NP_780384    |   |
| Mouse | Centb5-PH1    | -10.0 | NP_997106    | N |
| Mouse | Psd3-PH1      | -10.2 | NP_808366    |   |
| Mouse | Plekha1-PH1   | -10.3 | NP_001074815 |   |
| Mouse | LOC631847-PH1 | -10.3 | XP_985360    |   |
| Mouse | Centd2-PH3    | -10.4 | NP_001035201 |   |
| Mouse | Fgd3-PH2      | -10.6 | NP_056574    |   |
| Mouse | Plch1-PH1     | -10.6 | NP_899014    |   |
| Mouse | Plekha2-PH1   | -10.6 | NP_001077381 |   |
| Mouse | Osbpl11-PH1   | -10.7 | NP_789810    |   |
| Mouse | Psd-PH1       | -10.8 | NP_082903    |   |
| Mouse | Centd1-PH2    | -10.8 | XP_001001345 |   |
| Mouse | Plch2-PH1     | -11.1 | NP_780765    |   |
| Mouse | Afap1l1-PH2   | -11.2 | NP_849259    |   |
| Mouse | Cadps-PH1     | -11.2 | NP_001036082 | N |
| Mouse | Arhgap21-PH1  | -11.3 | NP_001074833 |   |
| Mouse | Centg2-PH1    | -12.1 | NP_001032213 |   |
| Mouse | Cit-PH1       | -12.2 | NP_031734    | N |
| Mouse | Syngap1-PH1   | -12.3 | XP_995323    |   |
| Mouse | Cadps2-PH1    | -12.5 | NP_694803    |   |
| Mouse | PSD3-PH1      | -12.7 | NM_177698    | N |
| Mouse | Afap1-PH2     | -12.7 | NP_081649    |   |
| Mouse | Plcg1-PH1     | -12.8 | NP_067255    |   |
| Mouse | Abr-PH2       | -13.1 | NP_942598    |   |
| Mouse | Triobp-PH1    | -13.2 | NP_613045    |   |
| Mouse | Rtkn-PH1      | -13.4 | NP_598396    |   |
| Mouse | TRIOBP-PH1    | -13.6 | NP_001074771 | N |
| Mouse | Plekha8-PH1   | -13.6 | NP_001001335 |   |
| Mouse | Dok4-PH1      | -13.9 | NP_444476    | N |
| Mouse | Appl2-PH1     | -14.0 | NP_660255    |   |

|       |               |       |              |   |
|-------|---------------|-------|--------------|---|
| Mouse | Appl2-PH2     | -14.0 | NP_660255    |   |
| Mouse | Tiam2-PH2     | -14.2 | NP_036008    |   |
| Mouse | Arhgef5-PH1   | -14.2 | XP_984730    |   |
| Mouse | Dnm1-PH1      | -14.3 | NP_034195    | N |
| Mouse | Plekha2-PH1   | -14.3 | NP_112547    | N |
| Mouse | Abr-PH1       | -14.5 | NP_942598    |   |
| Mouse | Afap1-PH1     | -14.6 | NP_081649    | N |
| Mouse | Centd1-PH3    | -14.9 | XP_001001345 |   |
| Mouse | Phlda2-PH1    | -15.1 | NP_033460    |   |
| Mouse | Gm1527-PH1    | -15.1 | NP_001028651 |   |
| Mouse | Ralgps2-PH1   | -15.2 | NP_076373    |   |
| Mouse | Bcr-PH2       | -15.3 | NP_001074881 |   |
| Mouse | CENTD1-PH1    | -15.4 | XM_132099    | N |
| Mouse | Rasal2-PH1    | -15.5 | NP_808312    |   |
| Mouse | Arhgap22-PH1  | -15.9 | NP_722495    |   |
| Mouse | Afap1l1-PH1   | -15.9 | NP_849259    |   |
| Mouse | Centg1-PH2    | -16.0 | NP_001028435 |   |
| Mouse | VEPH1-PH1     | -16.1 | NM_145820    | N |
| Mouse | Plekhf1-PH1   | -16.1 | NP_077724    | N |
| Mouse | AA536749-PH2  | -16.2 | NP_957697    | N |
| Mouse | Dnm2-PH1      | -16.3 | NP_001034609 | N |
| Mouse | Fgd5-PH1      | -16.4 | NP_766319    |   |
| Mouse | RALGPS2-PH1   | -16.5 | NM_023884    | N |
| Mouse | Centg1-PH1    | -16.7 | NP_001028435 |   |
| Mouse | Elmo1-PH1     | -17.0 | NP_932761    |   |
| Mouse | Plekhj1-PH1   | -17.1 | NP_076389    | N |
| Mouse | Farp1-PH2     | -17.3 | NP_598843    | N |
| Mouse | LOC669434-PH1 | -17.3 | XP_980149    |   |
| Mouse | Fgd1-PH2      | -17.5 | NP_032027    | N |
| Mouse | Arhgap12-PH1  | -17.6 | NP_001034781 |   |
| Mouse | Dok6-PH1      | -17.9 | NP_001034262 |   |
| Mouse | Sntb2-PH1     | -18.4 | NP_033255    | N |
| Mouse | Arhgap10-PH1  | -18.6 | NP_084389    | N |
| Mouse | CENTD1-PH2    | -18.7 | XM_132099    | N |
| Mouse | Fgd4-PH2      | -18.7 | NP_631978    |   |
| Mouse | Plekhn1-PH1   | -19.0 | NP_001008234 |   |
| Mouse | Skap1-PH1     | -19.1 | NP_001028358 |   |
| Mouse | Cdc42bpg-PH1  | -19.2 | XP_983816    |   |
| Mouse | Veph1-PH1     | -19.2 | NP_082633    |   |
| Mouse | Fgd6-PH1      | -19.3 | NP_444302    | N |
| Mouse | Plcb4-PH1     | -19.4 | NP_038857    |   |
| Mouse | Adrbk2-PH1    | -19.5 | NP_796052    |   |
| Mouse | Col4a3bp-PH1  | -19.5 | NP_075909    | N |
| Mouse | Ddefl1-PH1    | -19.8 | NP_001008233 |   |
| Mouse | Als2-PH1      | -19.9 | NP_082993    |   |
| Mouse | Prkd2-PH1     | -19.9 | NP_849231    |   |
| Mouse | Osbp-PH1      | -20.0 | NP_001028346 |   |
| Mouse | Ngef-PH1      | -20.1 | NP_063920    | N |
| Mouse | Plcd4-PH1     | -20.2 | NP_683739    | N |
| Mouse | BC067047-PH1  | -20.2 | NP_808450    |   |
| Mouse | Plekhg3-PH1   | -20.3 | NP_722499    |   |



|       |                   |       |              |   |
|-------|-------------------|-------|--------------|---|
| Mouse | Osbp2-PH1         | -20.5 | NP_690031    |   |
| Mouse | Spnb4-PH1         | -20.5 | NP_115999    |   |
| Mouse | Trio-PH2          | -20.7 | NP_001074771 |   |
| Mouse | 4933428G20Rik-PH1 | -20.7 | NP_067468    |   |
| Mouse | Psd2-PH1          | -21.5 | NP_082983    | N |
| Mouse | Arhgap9-PH1       | -21.8 | NP_666123    |   |
| Mouse | Ralgps1-PH1       | -21.9 | NP_780420    |   |
| Mouse | A1586015-PH1      | -22.1 | NP_064376    |   |
| Mouse | Ddef2-PH1         | -22.1 | NP_001091637 |   |
| Mouse | Rasgrf1-PH1       | -22.3 | NP_001034744 |   |
| Mouse | Centd2-PH1        | -22.6 | NP_001035201 |   |
| Mouse | Osbpl8-PH1        | -22.7 | NP_001003717 |   |
| Mouse | Apbb1ip-PH1       | -22.8 | NP_062329    | N |
| Mouse | Ddef1-PH1         | -22.8 | NP_034156    | N |
| Mouse | Prkcm-PH1         | -22.8 | NP_032884    | N |
| Mouse | Psd4-PH1          | -23.0 | NP_808279    |   |
| Mouse | Arhgef19-PH1      | -23.1 | NP_766108    |   |
| Mouse | Pld2-PH1          | -23.1 | NP_032902    | N |
| Mouse | Afap1l2-PH1       | -23.2 | NP_666214    |   |
| Mouse | RASGRF1B-PH1      | -23.2 | NM_001039655 | N |
| Mouse | 2610034M16Rik-PH2 | -23.5 | NP_081277    | N |
| Mouse | Plcd1-PH1         | -23.5 | NP_062650    | N |
| Mouse | Ect2-PH1          | -23.5 | NP_031926    |   |
| Mouse | Sh2b3-PH1         | -23.8 | NP_032533    |   |
| Mouse | Lnk-PH1           | -23.8 | XP_995739    |   |
| Mouse | Osbpl5-PH1        | -24.0 | NP_077251    | N |
| Mouse | ABR-PH1           | -24.3 | NM_198894    | N |
| Mouse | Raph1-PH1         | -24.5 | NP_001038978 |   |
| Mouse | Plcl2-PH1         | -24.5 | NP_038908    | N |
| Mouse | Arhgef6-PH1       | -24.5 | NP_690014    |   |
| Mouse | Iqsec2-PH1        | -24.7 | NP_001005475 |   |
| Mouse | Arhgef16-PH1      | -25.0 | XP_994560    |   |
| Mouse | Rasgrf2-PH1       | -25.0 | NP_033053    | N |
| Mouse | Tiam1-PH2         | -25.3 | NP_033410    | N |
| Mouse | Itsn1-PH1         | -25.5 | NP_034717    | N |
| Mouse | Adrbk1-PH1        | -25.7 | NP_570933    | N |
| Mouse | DOK1-PH1          | -26.0 | NM_010070    | N |
| Mouse | 4631416L12Rik-PH1 | -26.1 | NP_001074764 |   |
| Mouse | Sh2b2-PH1         | -26.1 | NP_061295    | N |
| Mouse | Bcr-PH1           | -26.3 | NP_001074881 |   |
| Mouse | E130112L23Rik-PH1 | -27.0 | NP_937892    |   |
| Mouse | Snta1-PH1         | -27.1 | NP_033254    | N |
| Mouse | Exoc8-PH1         | -27.2 | NP_932771    |   |
| Mouse | Cdc42bpa-PH1      | -27.3 | XP_999345    |   |
| Mouse | Fgd2-PH1          | -27.8 | NP_038738    | N |
| Mouse | Fgd4-PH1          | -28.1 | NP_631978    |   |
| Mouse | Spnb1-PH1         | -28.1 | NP_038703    |   |
| Mouse | LOC671775-PH1     | -28.7 | XP_994163    |   |
| Mouse | Plcg2-PH1         | -28.8 | NP_758489    |   |
| Mouse | Arhgef4-PH1       | -29.2 | NP_898840    |   |
| Mouse | Rasa4-PH1         | -29.3 | NP_598675    | N |

|       |                   |       |              |   |
|-------|-------------------|-------|--------------|---|
| Mouse | Pld1-PH1          | -29.5 | NP_032901    | N |
| Mouse | Spnb2-PH1         | -30.2 | NP_787030    | N |
| Mouse | Net1-PH1          | -30.2 | NP_062645    | N |
| Mouse | Centd1-PH4        | -30.3 | XP_001001345 |   |
| Mouse | KIF1A-PH1         | -30.4 | NM_008440    | N |
| Mouse | SH2B1-PH1         | -30.5 | NM_011363    | N |
| Mouse | Plekhm1-PH1       | -31.6 | NP_898855    | N |
| Mouse | Sntb1-PH1         | -31.7 | NP_057876    | N |
| Mouse | Iqsec3-PH1        | -31.7 | NP_001028526 |   |
| Mouse | DOK5-PH1          | -31.9 | NM_029761    | N |
| Mouse | Farp1-PH1         | -32.1 | NP_598843    | N |
| Mouse | Rock2-PH1         | -32.1 | NP_033098    |   |
| Mouse | Farp2-PH1         | -32.2 | NP_663494    |   |
| Mouse | E130306D19Rik-PH1 | -32.2 | NP_001013395 |   |
| Mouse | Arhgef9-PH1       | -32.4 | NP_001028501 |   |
| Mouse | Plekhg1-PH1       | -32.4 | NP_001028425 |   |
| Mouse | Spata13-PH1       | -32.7 | XP_998034    |   |
| Mouse | Dok5-PH1          | -32.8 | NP_084037    |   |
| Mouse | Sh2b1-PH1         | -32.9 | NP_035493    |   |
| Mouse | D10Ert610e-PH1    | -33.5 | NP_082303    | N |
| Mouse | Arhgef15-PH1      | -34.2 | NP_808234    |   |
| Mouse | Fgd3-PH1          | -34.2 | NP_056574    | N |
| Mouse | PLEKHC1-PH1       | -35.2 | NM_146054    | N |
| Mouse | Plekhg6-PH1       | -35.3 | NP_941006    |   |
| Mouse | KIF1B-PH1         | -35.5 | NM_207682    | N |
| Mouse | Trio-PH1          | -35.9 | NP_001074771 |   |
| Mouse | Itsn2-PH1         | -36.0 | NP_035495    | N |
| Mouse | Tiam1-PH1         | -36.0 | NP_033410    | N |
| Mouse | Kalrn-PH1         | -36.0 | XP_998128    | N |
| Mouse | Cdc42bpb-PH1      | -36.8 | NP_898837    |   |
| Mouse | LOC640526-PH1     | -37.4 | XP_622736    |   |
| Mouse | Kalrn-PH2         | -37.4 | XP_998128    |   |
| Mouse | Spnb3-PH1         | -37.9 | NP_067262    |   |
| Mouse | Centd2-PH4        | -38.2 | NP_001035201 | N |
| Mouse | Grb7-PH1          | -39.0 | NP_034476    | N |
| Mouse | Plekhg5-PH1       | -39.8 | NP_001004156 |   |
| Mouse | Arhgef7-PH1       | -41.2 | NP_059098    | N |
| Mouse | Afap1l2-PH2       | -41.3 | NP_666214    |   |
| Mouse | ARHGEF3-PH1       | -41.5 | NM_027871    | N |
| Mouse | Tiam2-PH1         | -41.6 | NP_036008    | N |
| Mouse | Grb14-PH1         | -41.8 | NP_057928    | N |
| Mouse | Mcf2-PH1          | -42.6 | NP_573460    | N |
| Mouse | Plekhg4-PH1       | -42.9 | NP_001074802 |   |
| Mouse | Arhgef18-PH1      | -42.9 | NP_598723    | N |
| Mouse | RASGRF1A-PH2      | -43.2 | NM_011245    | N |
| Mouse | ARHGEF2-PH1       | -44.3 | NM_008487    | N |
| Mouse | VAV2-PH1B         | -45.3 | NP_033526    | N |
| Mouse | ROCK1-PH1         | -45.7 | NP_033097    | N |
| Mouse | Arhgef2-PH1       | -46.0 | NP_032513    |   |
| Mouse | Fgd1-PH1          | -46.9 | NP_032027    | N |
| Mouse | Mcf2l-PH1         | -48.4 | NP_835177    | N |

|              |                        |       |              |   |
|--------------|------------------------|-------|--------------|---|
| Mouse        | Vav3-PH1               | -49.1 | NP_065251    | N |
| Mouse        | Vav1-PH1               | -51.3 | NP_035821    | N |
| Mouse        | Grb10-PH1              | -51.6 | NP_034475    | N |
| Mouse        | Sos2-PH1               | -53.4 | XP_992919    | N |
| Mouse        | Akap13-PH1             | -55.4 | XP_984499    | N |
| Mouse        | Sos1-PH1               | -55.9 | NP_033257    | N |
| Mouse        | RGNEF-PH1              | -58.3 | NM_012026    | N |
| S.Cerevisiae | SLM2-PH1               | 14.2  | NP_014351    | N |
| S.Cerevisiae | OSH3-PH1               | 12.5  | NP_011940    |   |
| S.Cerevisiae | BOI2-PH1               | 5.8   | NP_011039    |   |
| S.Cerevisiae | BOI1-PH1               | 5.0   | NP_009468    | N |
| S.Cerevisiae | SLM1-PH1               | 0.2   | NP_012161    |   |
| S.Cerevisiae | SWH1-PH1               | -0.5  | NP_009421    |   |
| S.Cerevisiae | BUD4-PH1               | -2.7  | NP_012625    | N |
| S.Cerevisiae | CLA4-PH1               | -3.9  | NP_014101    |   |
| S.Cerevisiae | OPY1-PH1               | -5.0  | NP_009687    |   |
| S.Cerevisiae | SPO14-PH1              | -6.0  | NP_012956    |   |
| S.Cerevisiae | ASK10-PH1              | -6.1  | NP_011611    |   |
| S.Cerevisiae | YSP1-PH1               | -7.3  | NP_012025    |   |
| S.Cerevisiae | OSH2-PH1               | -7.5  | NP_010265    |   |
| S.Cerevisiae | SKM1-PH1               | -8.8  | NP_014528    |   |
| S.Cerevisiae | PLC1-PH1               | -8.9  | NP_015055    |   |
| S.Cerevisiae | TUS1-PH1               | -9.3  | NP_013529    |   |
| S.Cerevisiae | ATG26-PH1              | -12.1 | NP_013290    | N |
| S.Cerevisiae | YHR131C-PH1            | -12.2 | NP_011999    |   |
| S.Cerevisiae | CDC24-PH1              | -13.5 | NP_009359    |   |
| S.Cerevisiae | BEM3-PH1               | -15.5 | NP_015210    |   |
| S.Cerevisiae | SPO71-PH1              | -18.8 | NP_010389    |   |
| S.Cerevisiae | BEM2-PH1               | -21.1 | NP_011082    |   |
| S.Cerevisiae | NUM1-PH1               | -24.1 | NP_010434    |   |
| S.Cerevisiae | YEL1-PH1               | -26.0 | NP_009493    |   |
| S.Cerevisiae | SIP3-PH1               | -30.6 | NP_014142    |   |
| S.Cerevisiae | CAF120-PH1             | -32.0 | NP_014121    |   |
| S.Cerevisiae | SKG3-PH1               | -33.0 | NP_013288    |   |
| S.Pombe      | csx2-PH1               | 3.0   | NP_595897    | N |
| S.Pombe      | SPBC17G9.08c-PH1       | 3.0   | CAB52806     |   |
| S.Pombe      | SPAC26A3.10-PH1        | 0.2   | NP_594153    | N |
| S.Pombe      | ksg1-PH1               | -3.1  | NP_588442    | N |
| S.Pombe      | SPCC576.15c-PH1        | -3.1  | CAA21194     |   |
| S.Pombe      | SPAC23H3.01-PH1        | -3.8  | NP_001018249 |   |
| S.Pombe      | SPAC19A8.01c-PH1       | -3.8  | CAB16232     |   |
| S.Pombe      | SPBC2F12.05c-PH1       | -5.2  | NP_595710    |   |
| S.Pombe      | SPAC11E3.11c-PH1       | -5.8  | NP_594936    | N |
| S.Pombe      | reserved_name_rga2-PH1 | -7.7  | NP_594152    | N |
| S.Pombe      | SPAC26A3.09c-PH1       | -7.7  | CAA93232     |   |
| S.Pombe      | SPAC19A8.02-PH1        | -8.0  | NP_593790    |   |
| S.Pombe      | pob1-PH1               | -8.4  | NP_596828    |   |
| S.Pombe      | SPBC1289.04c-PH1       | -8.4  | CAB38684     |   |
| S.Pombe      | SPAC1F5.09c-PH1        | -8.5  | NP_592864    |   |
| S.Pombe      | plc1-PH1               | -10.9 | NP_594734    |   |
| S.Pombe      | SPAC22F8.11-PH1        | -10.9 | CAB52721     |   |

|         |                   |       |           |   |
|---------|-------------------|-------|-----------|---|
| S.Pombe | SPCPB16A4.02c-PH1 | -11.2 | NP_588026 | N |
| S.Pombe | SPAC23H4.01c-PH1  | -11.3 | NP_593405 |   |
| S.Pombe | SPAC6G9.04-PH1    | -12.8 | NP_594113 |   |
| S.Pombe | SPAC637.13c-PH1   | -17.7 | NP_594631 |   |
| S.Pombe | SPAPYUG7.03c-PH1  | -21.1 | NP_594704 | N |
| S.Pombe | SPAC2F7.16c-PH1   | -23.0 | NP_592986 |   |
| S.Pombe | SPCPB16A4.02c-PH2 | -25.8 | NP_588026 |   |
| S.Pombe | SPCp054-PH1       | -27.5 | NP_588075 |   |
| S.Pombe | SPCC4B3.15-PH1    | -27.5 | CAB60689  |   |
| S.Pombe | SPBC428.07-PH1    | -28.5 | NP_595185 |   |

Sequence

IVIESWLHKKG.....eHIRNWRPRYFILFR.....dGTLLGFRSKP.....kEDQPLPEPLNNF..MIRDAATV.....c  
VVIEGWLHKKG.....eHIRNWRPRYFMIFN.....dGALLGFRAKP.....kEQPFPEPLNDF..MIKDAATM.....  
AEREGWLFKQSSnpifsGALSWKKRWFVLSE.....NCLYYFDQMT.....dKEPKGIITLANV..GIRKVEAP.....  
PLCTGYLSKRG.....aKLKLWVPRFFVLYP.....dsPKVYYYEDFE...nwktaEKPSGCIDLVDf..KSFNLEQT.....  
KKLEGWMMHFI....IsDPERRLKHYWMMQS.....NAIHLYNEYS.egigvnpNRVYRIIPLAEI.tSVVQNNGK.....  
VEKAGWLNKWT.....nYLKGYRQRWFVLDS.....nATLSYYRNPSS.....evgHTCRGSINLQEA..RVHTDKT-.....  
RTFCDCVCKKL.....-----SDI-.....IRPTPAFECKNC..HFKTHKDH.....VAQGSLPMCI  
--MEGPLSKWT.....nMVHGWQYRWFKIEN.....DTLLYYTSRE...kmlkGQQRGQIRLTGA..VVGIDGE-.....  
VQNYGILMKKY..krknRSARWAKRFFVLKE.....CFLIYYSTSYfektridLHPKGIIPGIC..SIVSGGDV.....  
VFKFGNLQQVDSrlawkKVLHYKKRYVQLTN.....THLIWQKDVQ.....CAPKGTVPLSDI..KFVNVDN-.....  
VRHMGWIAEQV...senGISMWKPCKFMTLTN.....SEILFYEAVP..qlkaewAEPRLVRPLVAT..RVVQTSSR.....  
MEKSGYWTQLT...dsRIKSLKRRYVVFKN.....GQISFYRKHN.....nrdEEPASKISISDI.rSVTKLEQQ.....  
ILKQGYLEKKR.....-GLFARRRMFLT.....egPHLLYIDVPN.....LVLKGEVPWTPC..MQVELKN-.....  
IDENGFFLRWL.....-IEGKDAVVLDL.....GQIWEARTGG.....lpKDGRIMFELEQR..GASETIA-.....  
LKYCGYCYCIG....rnAWKKWKKRFFCLVQ...vsqyaFAVCSFRQKK.....ADPTEFIQLDGF..TIDYMPES.....  
PFRSNPLKRTK.....SVSKMEKSLAEANQ.....HSLHRVDASNqpparrhISQPAREGSLRAC.rSHELLSS.....  
AIKE--NQRQ.....-----HFSPPA-.....MPQTVAGKKKR..ESRKIGTN.....skhndEEDECFE'  
GRMNGWLRVYR...ddmTGSTWIASWAMMDL.....TRISFYTNDG....adIEKPFPSIDLNKE..QWVLRGTGQ.....  
ILRDGKLIFFK....yEENWTSRNAVRLHV....dptPYILYWRYKDKvntkelAYEKNYIYLERI.yDVRAGKPT.....df  
IILEGSLKRCK..kykIFKTKWVEHYFVLHCrdreInFAIDEFKTSR.kndlkrFKLEFVIRVESN.ISVSDPSIL.....cta  
ADSEGAGSYSS.....-FSSIASTASRMLG...raaDCLVLMTKR-.....-----NGW..SGDAGSP-.....-----  
LPTNGVMKKWT....nYVNGWQDRYFEITE.....GNLVYYLSKA.....eksHGCRGSIFLKSA..IIAAHEF-.....  
TLRKGWLMRLG....kSDNDWCKHWVLAG.....LQLKLYKDVW....aedsTEPLLTVDLSQC.eNVYPSASA.....  
IDMKGFFDRKQsggkraTIRSWKNYYGILCG.....QLLFFKDEQ...qflenVAAAPPVYIYGA..QCEQYPEY.....  
KHTEGFVKKRPkqccvrYLLPWSKRWLMVRD.....SFVAYMDHR-.....TEQIRMVLLMDR..DFKVAAGG.....  
KVLEGQLKEKK..grwrFLKRWNTKYFTLSS.....AALNYSTQHM....ptdsRALLPSIDLSI.rSVRSLGRG.....  
VARQTWVKHQEalqksgKRNNWEDRWAVLCR.....RSLYLCVESP.....aYTTEKTIELGSH.trVDVCNAI.....v  
IQMEGWLSLRD.ntkksRKPKWTNCFVALNE.....YSFTIYVDE-.....-KAVSVILLIEA..GAMAHVR-.....  
ITYHGFLSMYQ..rtgeGLGSWTRYWCALEN.....GEMKFWKQPE.....dEGTKGYTALMDL.sTCCRSEGA.....  
ISYIGWVNEYLdddqeelKIRWQPRFLILKG.....SDVCFDVPV.....InsEDLNKCVYLYKC.yDVAVKQVP.....  
VLHSSQIRFRG.....SLGKLLDRFMVVRD.....dFCMYTYSSEE.....dICALAMLPLPGC..EVKMCGE-.....  
GRMNGWLRVYR...ddIPESTWTSWAMMDS.....NHVKFYRDAG...adnlENPYFTIDLNKE..QWILRTGQ.....  
EAFEGTLIRKHsldrkaANRSWEKLYAVLRQ.....NELSFYKDPK..hrdesVHGEPPLMALPGC..SVNVASDY.....  
LVGEGVLVKMC.....-RKKPKQRQFFLFN.....DILVYGNIVI....skkrYnkQRILRLEGV..QVEDLEDD.....  
MEYRGFLHILHplerakKVPIWHKYWSSLHR.....GAILFWSTPQ...eevheKVPIFQIDLTKC..TNNSIEES.....  
PIKQGNLYKKS..ksaLNREWKKKYVCLYS.....dGRLTYHTNLK...eymdkTAHGKEMDLKLA..TIRITGRL.....  
VTACGLYVAPfsmqshSAKRWQRRWFTLFD.....sGDLTYAIDNS.....mdTLPQLSIDMSLC.yRVSEAHAI.....  
VMMEGYLYKRS...snAFKTWNRRWFQIKD.....KQLLYSHRST.....dlePATIMEENLRIC..LVRPAPSN.....  
NTMCGYLKRKL....rNSSGWQDLWVVMCC.....HTLYFYRNHN.....eREPLAHLSLMDY..GVGLPTVA.....  
TAYEGLVKTPR....aggVRKGWQTAYVVVCD.....FKLYLYDCTVqnmqdvkNEIRLVLDMRDP..DFTVCGVS.....  
PEMEGFLYLKS.....dGRKSWKKHYFVLRP.....SGLYYAPKSK...kpttKDLTCLMNLHSN..QVYTIGIW.....  
RRFSGPLQLQQ.....-DFQWRAGWGVLKA.....NMLFVYNKTE...eetsAPPFLLLIIEDC..FIELCDEN.....  
VIRKGWLSLSN....vsFVRGSKDNWVFLMS.....DSLSWYKDE.....eKEKMYMLPLDGV..KLKDIEGG.....  
AEKGSLLCRIK.....NQKVKEMALVTIKS.....kQFLNYSSYW...fnfvPNALKSVALSEL.IEVRSGYQT.....dnlqras  
KLFEGWVRRRKeInaneLTKWPKIWMCLRG.....HYLLLYTNQN.....tkRPEMVINLIKA..TISDSTDL.....  
VILYGEMEQFD....veTKKPVQKCMLILLS.....HRLIIGNINA....agkYVMESTLSLNSV..APVNVKDR.....e

LIHQGTLQISE..siagNVQKPKDRRIFLFE.....QSAllADHIPkkefgnptYIFKSQFMVNKM..VFEPNVPD.....  
VVKEGNLNLVlKtfdnIKSSSAKRRCILRR..heggeCTFEIRKTAQ.....eAPKMLPLKVSAA..QIKSTKK-.....  
QTGSDFVKLRG.....-TNRQFRFFSLDA.....dISYIRWTPTNK.....KPHKARIAIDEI.rEIRLGKNT.....ellrdsdev  
PLKEGSVQLTS.....ISTLLSHHRYFFLYH.....ETLIISKQKG.....acsYKLKEKLRLEKV..WIASSNT-.....  
QSLEEYIHVLQvgilthPNRKILRVGFVLSarrapccRIMVLCSDRIGvnlDgnfFTVHAEFKLKGM..MIDEGDTY.....  
EYYSGLMRKYggktpfGRRSWRMVYARLRG.....LVLYFDTDEH.pkatsryASLENAVSLHHA..LAEPAPDY.....  
LVKKGVLTLQLVssnilqSRQKARTLHVFLFS.....DMIMITKKKL...ngtfvCKDYAARRFVDM..QPIEPDNP.....kip  
TIRCGDLERSEekvvkpKKREWITNYMYLTT.....AHLILYKDQKaeKhgkhyDAPQGVWDLRGA..SVTWYQDN.....  
VVMADTLKIRG.....ALKRWNRYCVLKP.....GLLILYKHKK.....adrGDWVGTVLLNHC..ELIERPSK.....  
SAICGYLHRIE..vrsiGLITRRRYWFALCD.....stPYLYWYKSDS.....dIKCIGRVSLSGA..AFTYDPR-.....  
SIKQGYVYMQEtigrdvLLGRWTKYYCVYSR...etriFTMVSANSAT.ktdmksaVAQTATFKFKSC..SRPMDSI.....  
LSAYGDLLEA..ffrQAGSKTTRLLFLFE.....EMLLIVKQRG.....anYVCKDYIMCSNL..MLNEWICP.....  
LIRQSEVMKQT.....-RKELQPRYLVLFT.....DYLWICRVSS...sgqfdINRSYRIPLEYM..KFERMEED.....  
VIVHGYIKKLG...gpFTSAWQTKYGKLYP.....SRLELYPEL.....TAKPELVFMDQI..EDVCAEMQ.....  
LKSLGLLRLQTrnkkaKLSRAQKRIFFFD.....GAVMFCKKRVTInsepeyFEHKFCIPIISL..GYDTSST.....  
VEYRGFLYLF.D.erspnGEAAWDYRWAHLR.....GIIFWKNPI.....DEKNQKVPLSQI..DLTKCTNQ.....s  
LLKEGMLYKRE...InGSANYQETVVFLFN.....DILLYGIKRI.svmpLckYEPSAILSLRHC..IVQLDDI-.....  
RLKDGEILKYT...sgfFSSKWKMYAVLFS.....dSRLVWFENRG.....dRKPKGSVLLKDV..IPYICVGL.....mtdrmj  
LIHEGPLELVE.....-NGRTVDMYAFLFN.....DMFVLTKTKpigksehyIVQRQPVPLDSC..VFCDADSN.....  
VNLDGEVKMAE..stltQAGKPKQRYIFLFD.....KVIVVCKAANGasartntFTYKNAYVMSEL..TIDKNASL.....dv  
LEKGDGLGMIRsseitkNKKWKTERFVYIFD.....QMIVLCKRHR.....ntLKFKDLAVHSI..DVFDIPDS.....  
FVTQDTLTFWE..prayFKGRGKERQVFLFD.....ISIVFAKRIEvspknikyVIK GKPLPLSEV..SIVEHVEG.....  
LLKSGSVQKIS...sTTEKTEERFIFLFN.....DLVILASERK..migvskYKLRAVFSASHM..QVCEGDNL.....

---

PDREGWLLKLG....gRVKTKRRWFILTD.....NCLYFFEYTT.....dKEPRGIIPLENL..SIREVEDK.....  
PDREGWLLKLG...ggRVKTKRRWFILTD.....NCLYFFEYTT.....dKEPRGIIPLENL..SIREVEDP.....  
PDREGWLLKLG....gRVKTKRRWFILTD.....NCLYFFEYTT.....dKEPRGIIPLENL..SIREVEEP.....  
PDREGWLLKLG....gRVKTKRRWFILTD.....NCLYFFEYTT.....dKEPRGIIPLENL..SIREVEDS.....  
PDREGWLLKEG....gRIKTKRRWFILTD.....GCLYFQYTT.....dKEPKGIIPLENL..CVKEVDDP.....  
VVREGWLHKG....eYIKTWRPRYFILKS.....dGSFIGYKEKP..etsdanQPPLNNFSVAEC..QLMKTERP.....  
VVKEGWLLKRG....eYIKTWRPRYFILKS.....dGSFIGYKEKP..eltdqsYAPLNNFSVEEC..QLMKTERP.....  
PELMLWWSWRTlspaggRVKTKRRWFILTD.....NCLYFFEYTT.....dKEPRGIIPLENL..CVREVIQ.....  
KMCKGFLVKMG....gKIKSWKKRWFVDR....IkRTFSYYADKH.....eSKLKGVIYFQAI.eEVYYDHLR.....  
KTCRGFLIKMG....gKIKTWWKRWVDR....nrRTLSYYADKH.....eAKLKGVIYFQAI.eEVYYDHLK.....sahkvif  
MLKEGFMIKRAggrnrfGLKNFKRWVRLTN.....HEFTYHKTG.....EGALCSIPIENI.IAVERLEEE.....  
KMCKGHLVKMG....gKIKSWKKRWFVDR....IkRTFSYYVDKH.....eTKLKGVIYFQAI.eEVYYDHLR.....si  
VVYSGWLRKSP.pekkIRRYAWKKRWVLRSGrlsgdpDVLEYYKNDH.....aKKPIRVIDLNL.C.eQVDAGLSF.....  
VIGENSILPSPppdspgDSEAWKKRWVLRSGrmsgdpDVLEYYKSDH.....aKKPIRIDLHCC.eQVDAGLTF.....  
EKQAGFMLKKR...kwPMKGWHKRYFYLDK.....GILKYAKCAA...dvekGKLHG CIDV-GL..SVMAIKK-.....  
EKHEGFMLKKR...kwPLKGWHKRRFFVLDN.....GILKYSKSPV...diqkGKLHGSIDV-GL..SVMSIKK-.....  
VNASGYLHKKG...gsqfSLMKWPLRFIIHK.....GCVYYFKSST.....sAAPQGTFSLNGY.nRVLRAAEE.....  
VIKAGYCVKQG....aLMKNWKRRYFVLEQ.....NSMSYFKSDL.....eKEPLRIILLKEV.hKVQECHKHS.....  
GTKEGYLVKQG....aFVKNWKQRWFTLNR.....YELKYFKDKM.....fVEPIRTLDLTEC..SAVQFDYS.....  
VIKTGYCVKQG....aVMKNWKRRYFMLDD.....NALSIFYKTD.....eREPLKVILLKEV.nKVQECHKQS.....  
KMCKGFLVKMG....gKIKSWKKRWFVDR....IkRTFSYYADKH.....eSKLKGVIYFQAI.eEVYYDHLR.....s  
ALRSGYCVKQG....nVRKSWKRRFFILDD.....QTVSYYKSEM.....dKEPLRSIRLRDV.IKVNECLVK.....  
VILKETLYKKSqkrrtSPCNYKERTFILNT.....QDLAYFEQRP...gkKPTQKGCIELSHI..KCVEIVRS.....dv  
SLKSGWLYKKGgmstISRRNWKMRWFVLRD.....SKLMYFENDS.....eEKLKGTIDIRAA.keIVDNHE-.....  
IVKQGCLLKQG....hRRKNWKVRKFLRD....dpAYIHYYDPSK.....geDDPLGSIHLRGS..VVTAVEFV.....f  
VVKRGYLLKQG....hKVKNWKVRLFVLR....epGFLHYDPSK.....ddVTPAGSVSLRGC..LVSALDDN.....  
-----MKG.....---WHKRYFLLER.....GILTYAKTGS...dIkkGRLRGRIDV-GL..SVMAMKK-.....-KSMI  
DLCSGFLYKSPpsgqirKMKS WKRRFFVLEK..knngsHELKYYKTTE.....kDKAIEVSSI..TLLYVGPE.....sh

ILKEGFMVKRG.....hVVQNWKVRFWALKS.....DRLLYYKYEG...gkrdSCHRGITILLRNC..KITCPYLE.....  
GICEGYLMKRR...kwPLKGWHKRYFVLDK.....GILRYTKNQH...dfsrgKMHGSLDVSLA..VMSVNKK-.....  
VLKEGYLWKKG....qLRRNWTERWFTLRP.....STLLYFTSED.....rKDHKGNIQLDGN.cCVEVLPDR.....  
YLKEGYMEKTG...piQREPFKKRWFILDS.....mdRKLLYFKTQLielgvvfiGSENHGYSVREC..VPKGTRGN.....  
IYKMGVPDKRK.....-GLFARRRQLLLTE.....gPHLYYVDPVN.....KVLKGEIP--WS.pELRPEAK-.....  
ALKQGWLMKKGggsstlSRRNWRRRWFVLRQ.....SKLIYYENDT.....eERMKGMLDMHEA.keIIDVTG-.....  
IVKKGYLLFNK....gKGKRWKHLYFILEG.....ndAHLIYFESEK.....raTKPKGLIDL SVC..SVYGVHDS.....  
EIRTGYLNKSP...pakGIKSWKRRFFVLSK..vdkdnYHLSYRNE.....srDKPLGTIDL SKI..SLLSTAPE.....ahsn  
GDCQGWLKRR.eskglLGWKWKFFVLDK.....CSLYWYTSMD.....aEKAEGYINLRDF..TIEQATEC.....  
GDCEGWLWKKK.daksyFSQKWKKYWVVLKD.....ACLYWYTNEE.....dEKAEGFVSLPEF..NIDQASEC.....  
RSFEGILYKKG....aLLKPWKPRWFVLDK.....tkHQLRYETRQ.....dKECKGMIELADV.eSVIPGTPA.....  
LEKTGYLLKMG....sQVKA WKRRWFILRN.....GEILYYKSPS....dviRKPPQGMELNSS.chIARGEG-.....  
TIREGYLVKKG....tVLSWKAVWVVLKD.....DAIEFFKKT.....dRNAKGMIPKGA..TLTSPCQD.....  
-----MEKKQ....sRAQSWRKRWFVLRGrmsgnpDVLEYRYSKS.....sRKPIRTIDLQEC..EVTIEAEV.....rf  
GDCEGWLWKKK.datgyFTQKWKKYWVVLKD.....SNLYWYTNQN.....dEKAEGFISLPEF..RIDRAIEC.....  
VLKEGYLWKKG....hLRRNWTERWFCLKP.....GSFSYYVSED.....aRDCRGIEMDHN.cCVEVLPDR.....  
VSRQGWLKQA...ssGVKQWNRWFVLT.....RCLFYKDEK.....eEGLGSLPLLSF..KIGPVQTS.....  
TISEASTVTTgskdssGMRLWKRKWFVLD.....FCLFYKKEWClyptdsreESVLGSIPLPSY..TIAPVGPE.....  
VDKEGYLYKKR....eRNTTYLRRWFVLDK.....NLLFYQERPG.....dRNLLGVIVLEGC..MVQACETD.....  
VIKNGWLHKQD....stGMKMWKRWFVLD.....MCLFYRDEK..eegilgSILLPSFHISML..SVDDHIT-.....  
IWKCGYLRKQK.....---HGHRFFVLRG.psnlgsrSLEYYDSEKkaaasgvtCPAKRVIYLSQC.ftVNKRADA.....  
SSMSGYLHRSK....gHKKPWKRLWFVIK.....KVLTYAASE.....dVAALESQPLLG..FLREEKTG.....  
EYTYGTLQKSPiaknllSQKSWKRRFFVLSK..tvdnnHQLTYPSSE.....rrDKPLGKIDL SKI.sLLFTSPDS.....hpt  
IHKGYLVKKG....hVRRNWQERWFVLPK.....GSLIYYVAED.....qKEKKGEILLEES..SVVESVPD.....  
IEEKGFMTMFE...dvsGFGAWHRRWCVLG.....YCISYWTYPD...dekrKNPMGRINLANC..TSRKVEPA.....  
KMFEGPLWKSS....RFFGWRSYWVVLQD.....GVLSWYPKQT...dadsnTRRQGCKPLTQA..HCMIKAK-.....  
PLCQGFLKKRK.....-----DK.....mLDLRGQYYIYEV.qSVREVNKS.....dNNRYMFEI  
LLYLGNVKRVD.....-----SVKQ.....CCLIRFEDNS...efwlrKDIHSFSSGGE..EVCCICDS.....pplKEF  
EACSKPLWHVF.....-----KPPPALECRRC..HVKCHKDH.....ldKKEDMITPCK  
PDCDGWLWKKRkeagvMTQKWQRFVFLK.....PTLYWYNSQQ.....eEKAEGLIKIGSY..NIESAGEH.....  
SKLCGYLNKLT...gkgPLRGFKTRWFVYDP.....rkCFLYFKTPQ.....dALPIGHIEIGDA..CFSYDVEA.....  
VKKVGYLRPK.....---SMHKRFFVLR.AsasgprSLEYYENEK..kwrhksGAPKRSIPLASC.fNINKRADS.....  
PDKTGFLFKG....eRNTAYHRRWCILKG.....NMLFYFEERE.....sREPIGVIVLEGC..TVELCESE.....  
VSFEGYLEMLS.....---PRTKVYTLINR.....DKLFLFKSH-.....EEYFQGMGITDI.dMRMANVRD.....gl  
FIIRGWLYKEI.rgssqANLKLKKRWFVLT.....NSVDYYKSSE.....mALKLGSLVLNSL.cSVLVPDER.....  
GLVRGWLLREV...qgGWLRRRWFVLT.....DSL DYYSGPD.....rdARRLGTLVLTSL.cSVLWPKH.....  
VLKQGYMMKKG....hKRKNWTERWFLK.....SLISYYVSED.....ITEKKG DILLDGN.cCVESLPDK.....  
IRKHGYLKKQK.....---HGHRRYFVLDK.tsdglpARLEYHENEK..kwknkSAPKRVIPLDSC.ISINKRADA.....  
FIKRSQKKT.....SPLNFKERLFLVLT.....DKISYYDYDA...ekakrKSLKGYVDIEKI..RCVEVVLP.....ed:  
STKEGPLYRA.gssylGKEVWVWVLSL.....GILYQAERT.....dVTPLMSVTMGGG..HCGGCRRS.....  
VYKNGFLVRKVgkktprGKRGWKTFYAILK.....LILYLQKDEYrpdqklsdEDLKNVSIHHS..LAMRAADY.....  
PDKTGWIRKFC..gkgjIFREIWKRFVILK.....DQLLISEKEV.....kdeKKIQEVVDLTDY.eKSEELRKA.....  
SFLCGFLQYSD.....RTKPSQRVWCVIPQ...hdaLVLYLYGAPQ.....dVKALCTIPLLYG..QVEDVQRS.....  
VKKCGYLRKQK.....---HGHRFFVLR.psdgsrARLEYESEK..kwknkSAAKRVIPDSC.ININKRADA.....  
PDKTGWIRKFC..gkgjIFREIWKRFVILK.....DQLFISEKEV.....kdeKKIQEVVDLTDY.eKSEELRKA.....  
SVLCSFLHHME...kgSGRGWQKAWFVIPE...nepLVLYIYGAPQ.....dVKAQRSLPLIGF..EVSLPESG.....  
LVGEGCLQKLC.....-RRGPQPRVFYLFN.....DILVYGSIML...hgrwNNKQNIIPLEEV..QQEDLEDG.....  
ATKAGWLDKLS...pqGNCVFQRRWVKLEG.....GNLTYNNEK.....eMYSKGLIPLSAV.kQIRALGE-.....  
HGKQGEVFLQH...qkHGEKWKRYWLALHP.asrhgiARLELSEAIQrstvvrHPERKVIRLADC.vSVVKLPPH.....  
IRKCGYLRKQK.....---HGHRFFVLR.sshvgprSLEYYDSEKaaaapagaSPPKRVIYLYQC.ftVNKRADS.....  
VQHEGFLTMFE...dvsGFGAWQRFYFLLEG.....GHLLYWNYPN...emgskPADGSLSLYGF.cSVRPVERE.....

NFKKGWMSKLD.....ESGEWRKHWFLTD.....AGLKYRDSA...aerDDVDGEIDLKAC.vKVSEFEVE.....  
AEKAGWLKSS...gkFLSSYKDRYIQLDR.....TAIAVYENEE.....ITTCLEKLELDNY.eTCHELKSA.....  
VSKHGWLKANsaisvTMKSFKRRYFHLTQ..lgdgsYNLNFYKDEK.....isKEPKGTIFLDSC.mGVIQNSKV.....  
PLKTGWLKKQR.....sIVKNWQLRFFVLRG.....NSLTYHKDDK.....eSTVQGTIPLFSC.QVNELPSN.....  
TKLCGYLNKQG....gPLKTWKSFRWFAYEE....ksCQLFYRMAH.....dINSLGKVDLTRA.TFSYPLRG.....  
IVMEGYLFKRA...snAFKTNRRWFWSIQN.....NQLVYQKKFK.....dNPTVVVEDLRLC.TVKHCEDI.....  
SFMDGFLYCSAatldrkGKPDMMVRRWCTLEG.....GFLSYDNEK.....iATPIGRVDIGDV.vSLAINNNQ.....  
PIYGGWLCCLAPfdnmpqRSRKWQRRFFVLYE.....hGCLRFALDES.....psTLPQGTVMNMNQC.tDVVDAEPR.....  
HVKEGQLYVQH...qkFGKKWKNWFVLYP.asqngiARLEFYDCSGasdkpstkkMDKKIIRLSEC.iSILPAVTE.....  
MSTAKNLLLLA..ssqeDQKWVSR-----.....---LMKKIPpapdaphrSSPRVPVKVQSS.qSMRRPSRQ.....  
MQAGSQMIKLR.....GKSKALVRLFYLDE.....hkSCIRWRPSR-.....KHERAKITIDSI.hEVCEGMRT.....evfrf  
SIMEGPLSKWT.....nVMKGWQYRWFVLDY.....naGLLSYTTSKD...kmmrGSRRGCVRLRGA.VIGIDDE-.....  
PDKVGWIRRFs.gkjiFREIWRNRVMLKG.....DHLFIFEKEM...knnGKTHEVFDLVHY.eRSEELRKA.....  
QMMSGCLRVKL...ggEPQGWTVYGVKLG.....TNLFCYHQKE...dmeanVEPVTIGINKE.tRIRAAEKD.....  
PILSGWLDKLS...pqGNYVFQKRYVKFDG.....KNLMYFGSEK.....dAYPKGVIPLAAI.QMARLAK-.....  
ILYSGFLYKSGtIsrrtRDADFQKYWCSV-E.....KSILFYESDR.....cHEPSMKIDVKDI..ICLGVSRP.....dssnn  
VLKSGYLEKRR.kdhsfGNEWQKRWCALNN.....SIFYYYGSEK.....dKQKGEFNIVGY..TVKMNNL.....  
ILKQGYLEKRR.rdhsfSMEWQKRWCALNN.....TIFYFYGSDK.....dKQKGSFYINGY..SAELVPSL.....  
SVKEGLLQKT....sSFQRWKRRYFKLRG.....RTLYYAKDSK.....SLIFDEVLDLSDA.SVAETSTK.....  
VVKAGWLKKQR....sIMKNWQLRWFVLR.....DHLFYKDEE.....eTKPQGCIPLQGS.QVNETAN.....  
TNKSGYVELRG.....---LKGRVYLSLMG.....TCFRLCKTDQ.....dFNAGLAIIVVDL.TAACVKQF.....  
CYYEGYLEKRG....aKEKVARRLWTCLCG.....NTLYFYNNPK.....dTHYVEKLDLSGF.vSLIDDPSR.....  
NGKKGWMYLLD.....EDEEWRKFWFVITD.....SGLRYRDSE...aerDEADGEVYLRHC.IRVEEFDAD.....  
GVMSGTLQRCR....nSKRSWRSWFLKLD.....KVLYTYPQPE.....eRVACETPLLLGF.SVRSEAEG.....  
-----MYKFI.....-----SS-.....-KPKVSVPLSAI.vEVRTTmpl.....empDKDNTFVLKVeN  
VRRSGYLKQK.....---SMHRRYFVLRA.asergPARLEYEYSEK..kfrgkaPVPKKALALETC.fNINKRADS.....  
NRTCGFLDIEE....neNSDRFSRRYFILD.....dkNYLLWYMDNP..qnlpvgTEHVGSLRSLSYI.sKVNEASLK.....  
--MEGVLYKWT....nYMTGWQPRWFVLDN.....GIISYYSQD.....dvcKGSKGSIKMPVC..EIKVHPT-.....  
VLKGEYLNKAKaeggkLRKNWTLTWVLLSS.....NQLLFYKESKeavsnlpGGKPDGVDLNGA..VIEWTTEK.....  
-LCEGSCFRKL....gNRRRQEKFWFCRLS...InhKLLHYGDLE-.....ESPQGEVPLELL..TDKIAVSD..ikavltgkdcphr  
VRKSGYLKQK.....---SMHRRFFVLRA.aseqgpARLEYEYENEK..kfrsksPVPKKAVNLDSC.fNINKRADS.....  
SIMEGPLSKWT.....nVMKGWQYRWFVLDY.....naGLLSYTTSKD...kmmrGSRRGCVRLRGA.VIGIDDE-.....  
GKNLEALRKPSkgtltqNAGRFSASWIFLN.....DVLV---HAQ.....FSSHVYVPLATL.WVEPISDE.....  
TQRAAELGMRG....pkKGDVVKKRFVVLIV.....NFLFYFRTDE.....DEPIGALLEQC..RVEREDLQ.....  
LEKAGILNKTKaengkrLRKNWAQSWTVLHD.....GVLTFHKDPKgmssktnqIVPEYTVELKGA.TLSWASKE.....  
CHICAFLLRKK....RFGQWAKQLTVIRE.....NRLQCYKSSK.....dQSPYTDIPLSLC.SVIYVPKD.....  
VIRKGWVIINN...isllKGSKEYWFLTA.....ESLSWFKDDE.....eKEKKYMLPLDNL.KVRDIEKS.....  
FIVRGWLHKEMkssgktsLKLKRWVFLTN.....NSLDYYKSSE.....rsASKLGLTVLNSL.cSVVQPDEK.....  
VVKEGWMVHYT....sKDNLKRHRHYWRLDS.....KCLTLFQND.....gAKYYKEIPLSEI.IQVEVARDF.....  
SVKEGLLQKT....sSFQRWKKRYFKLRG.....RTLYYAKDAK.....SLIFDEVLDLSDA.SVAESSTK.....  
MAHMTQAEMAH.....-----TCRGTITLATV..HIEVGET-.....---CHFVLTSgGR  
FVKSGWLHRQS....tILRRWKKNWFDLWS.....dGRLVYDDQQRrdmedeiHMKVDCINIRNA.sACRELAPP.....  
SMGSEHWSQKL..rlprGTQGHKTELLEIQR.....eGALRYMVADD.....TNCMGAQWQKC.RLLLRKT-.....  
IRKQGWLHYKQrkkvgsGMRQWKRVSFLHS.....SLLFLYKDKRagshgigqEKDIQTISIQQC..LIDIAYSE.....  
SPPLGKEHMPS.....-----SPMTDRK.....kKRNRSINLKGd.aAAGQAESE.....-ESVDF  
PRRQSMTVKKGqfmeIVEGARKLRHVFLFT.....DILLCAKLLKqTggkgqYDCKWYIPLADV.TFQTIDES.....  
SMQTGTQMVKL....rGGSKGLVRFYLDY.....hkSCIRWRPSR-.....KNEKAKISIDSI.rEVCEGKQS.....eifqr  
DVYEGMLWKKG....rDNGQFLERKFVLSV.....hdFTLKYKED.....sKGPKATYVKNL.NATFQPEK.....  
ISSEGILYVQE.krpppFGSSWVKRYSTFVK.....EQKILHMKTf.dqrsggkLGETESVTLKSC.VRKTDDAL.....  
WTMEGYLYVQE..krefGISVWSLHVLLINKikrtsnsHCIYLLSQNG.....vtSNPPEKFRKSC..IRRKTDSI.....  
IAMEGYLYKRA...snAFKTSWRRWFWSIQK.....NQLVYQKKHN.....eQITVVVEDLRLC.TVKPCSEQ.....



FLKEGYMEKTG...prQTEGFKKRWFTLDH.....RRLMYFKDPL.....dAFAKGEVFLGHR..DHGYRVTI.....g|  
VMKEGWLVHFT....sKDTLRKRHYWRLDS.....KCITLFQNDT.....gSKYYKEIPLSEV.ISLEPAKTF.....nl  
FVKSGWLHRQS....tILRRWKKNWFDLWS.....dGRLVFYDDQqrrdmedeiHMKVDCINIRNA.sACRELTPP.....  
TQRAAELGMRG....pkKGDVVKKRLVKLIV.....NFLFYFRTDE.....DEPIGALLEQC..RVEREDPQ.....  
SEKCATLNMTKtehggkVRKNWTSYWTVLQG.....SLLIFNKQGgwfgrdqkSSVEYSVDLKGK..SVDWASKD.....  
VLKAGWLKKQR....sIMKNWQLRWFVLA.....DHLFFYKDEE.....eTKPQGCISLKGS..QVNETLAN.....  
RSHESLLSPSS.....-----.....AVEALDLSMEEE..VLIKPVHS.....silGQDFCFEVTTS  
CQKSGFLELKG.....---TKSKIYTAIIM.....EQIWLYKSEQ.....cfKNGIGITVIEAR..GATIRDG-.....-KGI  
QSQCGYLFKTApitechPKADFSQRWCCLGD.....GMFSYRNEQ.....sHHKNGGMKISEI..ICLSVNSP.....  
IVKQGYVRMRS....rKLGYYRCWLVFVK.ssskgrRRELEKYPDEK....sayiRACPKVTEISNV.kNVTRLPRD.....  
NFKKGWMVKLD.....EEGQWKKYWFVLT.....HSLRYKDSI...aeaaSDLDGEIDLSTC.yNVTEYQAQ.....  
IAMEGYLFKRA....snAFKTWNRRWFISIQN.....SQLVYQKRFR.....dNPTVVVEDLRLC..TVKHCEDV.....  
NPRCGYLNVLV.....-NQCWKERWCCVRN.....RTLYFHKDRG.....dvHTHVRALALHGV..DVLPLGLP.....  
VYKTGFLARKIlgkktprGKRGWKTFYAVLKG.....MILYLQKDEYkpekalseDDLKNAISVHHA..LAIKAMDY.....  
ESRDGMLMKRG....rDNGQFLNRRFVLSV.....reGILKYTKLD.....aKEPKALMKVDTL.nACFQPKI.....  
GTIQGYLFKRS....rkNKTKWRCWFSTEN.....NQLIYLKSH-.....-KEQPVLFDL..RLCAVKS.....c  
LEKAGILNKTKsengkkVRKNWGHWSWTVLHG.....GKLTFHKDPKgassktnqILPEFTVDLKGK..TINRAPKD.....  
FRVTGFLSRRL....kGSIKRTKSQPKLDR..nssfrHILPGFRPVDesrshesILSPTSAVEALDL..SMEEVLI.....l  
SEKCGVLNVTKtehggkVRKNWASTWTVLQG.....SLLFAKGGQtswfggnqSKPEFTVDLRGG..SVEWASKE.....  
VKRGSPVLLQA.....-----.....-ISEVNRKQ.....wiEAMDGKEPIYHS.plQKQAES-.....-----  
RRLKGSIKRAK..sqpkLDRTGSFRHMILPRsadqertRLMQSFKESH...shesILSPSSAAEALDL..TLDEDAI.....kq  
KGLEGIVYKRSccghneVCYRWSKRWLIVKD.....SFLLYMKPD-.....TGAISFVLLVDN..EFSIKMDS.....  
LIGEGVLTCLC.....-RKRPKARQFFLN.....DILVYGNIVI...qkkkYNKQHIIIPLESV..TIDTVEDE.....gE  
EKVDGYLMKYT....nLVTGWQYRYFVLNN.....eaGLLEYFVNEQ.....srnQKPRGSLPLGGA..VISPSDE-.....  
FKVTGFLSRRL....kGSIKRTKSQPKLDR..hssfrNILPGFSAEesrshesILSPSSAVEALDL..SMEEVLI.....l  
VVMEGYLFKRA....snAFKTWNRRWFISIQN.....SQLVYQKRLK.....dALTVVVEDLRLC..SVKPCEDI.....  
SRICGYLWRK.....WLGHWsrQLFIKQ.....NSLLCFKCAK.....dLHPLLDLNLGMC..NVVYKFKQ.....  
YIREGWLKTVP....pKGTEAKPKMFYLFs.....DILLQAKPCSmhptngdkFTCQRVYPLKEC..TVDKVFGH.....  
SMIVGTVMRKI....kSRTWKKQRYFRLQE.....DCMTIYWYQSK.....kaGNAHSTFSVGDV.eAVREGHQS.....  
VIRRGWLTINI...siMKGGSKDYWFVLA.....ESLSWYKDEE.....eKEKKFMLPLDNL..KLRDVEKS.....  
VVHRGFLRKYG...gfmFKQWKEKYLVLTV.....eGNLMVCRDA-.....DAPADQVVALQS..HCESLVEG.....reil  
FERVGVRLRYKA...mIDPQQWKEGFFVLQK.....SNLFCPGND.....GAAEDIINLKRl.qELSIASEM.....  
IAASDSATQPD....KCVSVSDACVPLSS.....rSHLMPRLKES..rshesILSPSSAVEALDL..SMEEVLI.....kp  
CIMHGYMLKLG...npFLTQWQRRYFYLF.....NRVEWRGEG-.....ESRQNLLTMEHI.vTVEETQIK.....  
NDHEENVSTSQ.....---WRKHWFVLT.....QILRFYRDPV...aeaaADLDGEINLSTC.yDVTDYPVQ.....  
MKHCGYLWAIG...knLWKRWKRRFFVLVQ..vsqytFAMCSYREKK.....AEPVELLQLDGY..TVDYTDPO.....  
TEKSGYLYKRS....dgLRKMWQKRKCTVQN.....CYLTIAGHTP.....NKSPAKLNLLTC..QVKPSLE-.....  
FLKEGTLMKLS.....-RKVMQPRMFFLN.....DILLYTTPVQ....sgqYKVNSMLSLAGM..KVSQPSQE.....  
FLKEGTLMKLS.....-RKVMQPRMFFLN.....DILLYTTPVQ....sgqYKVNSMLSLAGM..KVSQPSQE.....  
LDLSSYLLKPV.....--QRISKYSLLLQ.....DLLRECECVT..naelqrTEIHTALNIIQF..QLRHGNNL.....laml  
PEIEGVLWLKD....dGKKSWSKKRYFLLRA.....SGIYYVPKGYflrplqtLRHYFGFYRDI..NHIKNDR-.....  
CEKKGYLLKKS....dgLRKVWQRRKCSVKG.....GILTISHATS.....NRQPVKLNLLTC..QVKPSAE-.....  
VKREGWLHFQgkkgvsAIWPWRRVFSVLRT.....HSLFLYKDKRkgaqlgggAEDEQPISIRGC..LVDIAYSE.....  
SEKKGYLFKKS....dgLRKVWQRRKCSVKN.....GILTISHATS.....NRQPVKLNLLTC..QVKPSGE-.....  
CYHEGFLEKKS....iKDKMGRKLWTSKCG.....DSLFFFNSSK.....dSVYIEKLELSDL.nSVSDDGSR.....  
LMNGGDLLKVR.....SESWKKTRYFKLQE.....DCKTMWHEsk.....ktLKTKQTFsIEDI.eEVRTGRQT.....ds  
NRICGFLDIEE...meNSGKFLRRYFILD.....mdSSLMWFMDNP..qnlpegTSNVGSIKLTYI.skVSDATKL.....  
LVLEGSFRVQR.....--VKKERAFFLFD.....KMLLIKAKRL.....DHFIYSTHIFCC..NLLLVENM.....KD  
KGLEGYILKRSicghhqFCFRWSRRWLIVKD.....SFLLYMSRDP...givsFVLLFDPELKV..VGRVYTD-.....  
MKACGYLWAVG...knVWKRWKKRFFVLVQ..vsqytFAMCSYREKK.....SEPQELLQLDGY..TVDYTDPO.....  
QIKNEIQREKR.....-----.....-VCKGGK.....vLDRLRKKLCEQE..SLLLMS-.....PCMAFRV;

RDKDRKMTRRS.....--TFQKGQYFVLD...pelGQLQYFINEH.....skvQKPRGSLPLIGS..SVAPSE-.....  
PSLESFLSRRRLaksqpkLDRtSSFRHMILPRsadqertRLMQSFKESH...shesILSPSSAAEALDL..TLDEDAIL.....  
RLCEGTCFRKI.....sSRRRQDKFWCRLSP.....nhKVLHYGDLEEspggevphDSLQDKLPVADI.kAVVTGKDC.....  
LEKQGEVLEVNgtflgnLRPKFTPVYLFN.....DLLVIAIKK-.....-SAERYVVDHA..HRSLVQVQ.....syen:  
TVLTYYSKKS.....QRPERRTFQVLET.....RQIIWTRGT-.....DKIEGEIDIREI.keIRTGQKS.....rdferyvedvl  
DSKSDIERLR.....-----SQLTSLSIH-.....SLDTTSSISIGN..DLDSDEAY.....pAAESGLEC  
IVKAGWLEKTP....pkGGRIYQRRWVQLDS.....EYLRYSQSIK.....EVYSKRMVSLGS..VFKVSV-.....  
VLKEGALEKRS....dgLLQLWKKKRCVLTE.....DGLVLHPKHhqqhdtgckVKELHFANMKTV..DCVERKG-.....  
PLIEGKLKEKQ...vrwkFIKRWKTRYFTLAG.....NQLLFRRGKS.....kdELDNNTIELSKV..QSVKVVAK.....  
VMQSGTQMVKL....kTGSKGLVRLFYLDE....hrSCIRWRPSRK...sekaKRPKQDMYDFW..RMVWQEN-.....  
LMHSSVIWLNpfpqlgrMKKDPELTVFVFR.....AVILLYRENNsahgdqdsFKFRWLIPLSAL..QVRLGNTA.....  
AMKAGMFFRKV....kSRMWRQRHYKLQD.....DCKTIAYKSS.....waINSYSTFSISDV.eAVREGHQS.....  
--MEGVLYKWT....nYISGWQPRWFVLEG.....GTLSYYDSQE....dawKGCKGSIKISVC..EIQVHPSD.....  
VMQSGTQMVKL....kTGSKGLVRLFYLDE....hrSCIRWRPSR-.....KSEKAKITIDSL.yKVTTEGRQS.....difh  
PDLEGVLYLKE....dGKKS WKQRYFLLRA.....SGLYYSPKGK...tkasRDLVCLVQFDNV..NVYYCKEY.....  
PDLEGVLYLKE....dGKKS WKQRYFLLRA.....SGLYYSPKGK...tkasRDLVCLVQFDNV..NVYYCKEY.....  
MEKEGFLFLHRkdkcmpMTSPFKKYYVTLK.....DTLSYSRTLH.....SKKSSSISLPKI.rAVEKVEEK.....  
KISQDAVLLMEahahltSSLQSKERLLLLFT.....DSLIIAKTKS.....lyLKLKAQVSLSDI..WLASCIHC.....vtdr  
KISQDAVLLMEahahltSSLQSKERLLLLFT.....DSLIIAKTKS.....lyLKLKAQVSLSDI..WLASCIHC.....vtdr  
ILHHTWFFSDDdtktEDQKQKEMQPVNI.....DHLL-----SNIGRVVPLQDF..SVSVAEVE.....cvlegcksetlr  
TTSSGHVRSQS.....-----VVS.....SIFSEAWKRGGadepkasRDLVCFLQLDHV..NVYLGQDY.....rskyl  
DMMSGFLSQQQ...sieGLQRRRCLYCVLKA.....GKISCYYSPE...eiqakVEPILIPINKE.tRIRVVEND.....  
IVCGALELNPIkqgdGVKGLIKRRLQGDD.....KRKSSTQLNTIsvaarygSKESLSIPVSAA.kSLNLSADQ.....f  
TERSGMLLKRS...egLRKVWQKRKCSVKN.....GLLTISHGTP.....NAPPANLNLTC..QVKRNPD-.....  
DTYKGWLFKWT....nYKGYQRRWFVLSN.....GLLSYRTQA....emaHTCRGTITLATV..HIEVGDT-.....  
VHHEGFLYRKHgkerspNSKSWVNLFCVLKQ.....GEIGFYKDAR...httpYNDEPLLNLAI..EFDTTNGY.....  
NRICGFLDIED...veNSGKFLRRYFILD.....qqGSLLWYMDNP..qnlpvgAKHVGFSLTYI.sKVSDATKQ.....  
LLKSGWLWRQS....sVLKRWKLNWCDLID.....GSFVFKSES.....rRDYETKVNKSS..CVNVRSGL.....ec  
VIRKGWLTNI...siMKGGSKEYWFLTA.....ESLSWYKDEE.....eKEKYMPLDNL..KLRDVEKG.....  
TEKSGFLLKKS....dgIRKVWQKRKCGVKY.....GCLTISHSTI.....NRPPAKLNLTC..QVRPNPE-.....  
ARICAFLLRK.....RFGQWTKLLCVIKD.....NKLLCYKSSK.....dQTPQMELLSGC..SITHIPKD.....g  
TYKHGVLTRKsgktrpGRRGWKKFYAVLKG.....MILYLQKDEY.....kpDKDLSEVDLKN.vRVHHALAT.....  
LLKLGQLERRS....AVGMWWDYYCELSP.....FELRLVNA-.....EERVCNENLSLL..RCEDIHLY.....  
LVLEGSFRIHR.....--AKNERTLFLFD.....RMLLITKRRG.....ehYVYKTHISCSTL..MLIESAK-.....-D  
LKRGSKFIKWD....eANSTPSLITLRVDP.....NGFFLYWTGG.....tSMEAEILDMSHI..RDTRTGKF.....aktpkdqrire  
LKRGSKFIKWD....eANSTPSLITLRVDP.....NGFFLYWTGG.....tSMEAEILDMSHI..RDTRTGKF.....aktpkdqrire  
DTYKGWLFKWT....nYIKGYQRRWFVLSN.....GLLSYRTQA....emaHTCRGTINLATA..HIDTEDA-.....  
PIKQGT LWKRS....ersLNKEWKKKYVTLN.....SGMLTYHSNIqnaqgkemDLLRVTVKVPKG..RLHRAAAP.....  
EAMEGILCRKQshnkksANRSWQNVYCVLRK.....GSLGFYKDNK.sasngipYHGEVPISLGEA..VCEVAHDY.....  
ALQLKPVSVNE.....-----VLKR.....GSKFIKWDE-.....-EAEILDMSHI..RDTRTGKF.....aktpkdqriremlfsgkadgr  
FVKEGTLMKVS.....-RKCKQPRHLFLNKeiteqrmNDIMLYTYPQ...qdqkYRLINRLPLAGM..KVSKPPME.....  
CYCRLFVDPDP...nrlQKLGQHREIFLNF.....DLLVVTKIFQ.kkknsvtYSFRQSFSLYGM..QVMLFENQ.....  
LMRDGFVVDVC.....-ESGHNLRLHFLYT.....DMLLCAKLTN..agrqaqYRFCWYLPLVGL..KLHWTAEH.....  
VLKKGWLIHNT....sDTLTKRHYWVLDG.....KSITLYPNEN.....tSKYYKEISLSEV.IQVRGADQI.....  
MIHSSKVRFRF....IHCQDVHDCYDLDFQ.....THLHFVSNT.....tgLTYQGTLPLKEL..TICKVQNR.....n  
FKVPGFLSKRL....kGSIKRTKSQTKLDR.ntsfrlPSLRPTENDRshesllspGSAVEALDLSME..EDVYIKPL.....  
DPRCGYVGVV.....-NRCWREHWCRVRA.....GSLYLYQEKG.....eqRVPHTTVGLKGC..EVVPGLG-.....  
DPRCGYVGVV.....-NRCWREHWCRVRA.....GSLYLYQEKG.....eqRVPHTTVGLKGC..EVVPGLG-.....  
LLRGGDLIKVK.....SNSWKKTRFLKLE.....DCKTIYQSSS.....kaFKRESSFELAEI.dSVRLGRQS.....egll  
LLQEGDIQVCVkiltskFLRRWEPHHLTLD.....SSLVSATPTG.....ymEAPLSYSTIEDL..QLLSWDNA.....  
LLHHGADSSVSggavggRGTRWHKCRVLKEggdgggleYFLEFYIPPK.....sSKPRLTVPCCSI.vDVRSTTAI.....

ILKEGELEKRS...dnLLQFWKRKTCVLT...DSLNIYTDQQ.....kKNKSKELKQSI.kKVDCVEHT.....  
LVREGPVTELR.dfsIkDREEERSVYMHLFN.....DYLLLSIRKEggrftvidHAPVSELRAENC..RFKLHSL-.....  
DELGGKLSKWT.....nYIHGWQDRWIALKG.....NILSYYRSAD.....ekeYGCRGSICLSKA.VITPHEF-.....  
ARICAFWRKK.....WLGQWAKQLCVVRE.....HRLCYKSSK.....dQTPLLDISLLGC.SVVYKEKQ.....  
LVRQGEELCVCG...ggRRKKTGVRNVFLYQ.....NFMIFTKHKT.pnpgnsvYSFKHSIKTGEM..GLTQSVGE.....  
LKKSGELAVYTdsifrKAFSFKSYLFLFN.....DVLIVTKK-.....-SEESYVLDYA.TVEKVEVE.....eem  
DTYKGWLFKWT.....nYIKGYQRRWFVLSN.....GLLSYYRTQA.....emgHTCRGTINLATA.NIAVEDS-.....  
TERSGNLYKKS...dgLRKVWQKRKCTVKN.....GYLTISHGTA.....NRPPAKLNLTC.QVKHNPE-.....  
LEKHGELQELsrgsifsMRNRCSPVYMFLFN.....DLLILTTRKS...gcpdrFTVIDYAHRSLV..QVQATVNS.....  
ATMEGYLYVQE...kwaLGVTWVKNYCKYFK.....dNKLFI MVPME...qkagiKQTTAQLTLKSC.IRRKTDST.....  
-----MTKRC.....-----TLFFYETDG.rsgidhnSVPKHAWAENS.IVQAVPEH.....pKKDFVF  
KDRVAFLKVL.....-NCWQSLWCWVKD.....GNLKMRYDEA.....sIEIPEYTVHLRGS.DVRPGPD-.....  
DELGGKLSKWT.....nYIHGWQDRWIALKG.....NILSYYRSAD.....ekeYGCRGSICLSKA.VITPHEF-.....  
IRLEGWLSLPV...rntKRFGWERYVVVSS.....KKILFYNSEQ...dkehSNPYMVLIDIDL.fHVRSVTQT.....  
ITYVTKVQLQH...mPCQEYDRLLVLYP.....NYLILSEES.....dgLFYKGLPLNMI.TVTTPCQD.....  
LLKKGVEVQMSstrtmrSRKLYHPIYFLFN.....NLLLITKRNS.....sgDKFQVLDCSRS.MLRTEDE.....  
IVMADWLKIRG.....TLKSWTKLWCVLKP.....GVLLIYKTNK.....nGQWVGTVLLNAC.ELIERPSK.....  
VPTCGYLNVL.....-NNRWREWCQLKD.....NQLFLHKDRA.....dIKTHMASLPLRGC.EVIPGLDS.....  
SSHRSLVHRVEialgdkPCDRGEHVTLFLFN.....DCLEIARKRHgqtrppaqLKHITLMPLSQI.rRVLDIQDT.....  
LVKHGELLEVDsisgskFKLTTRPVYLHLFN.....DCLLSRRKE...swkFMVVFHAKIEDL.KVKDLSQK.....  
EECKGWLFKKT...hYTRRWKMSWFHLKD.....GKLIYGLNE-.....ESAEKVIDLAGA.RMEVHDGD.....  
LLLQGNLLKIS.....-AGNIQERVFFLFD.....NLLVYCKRKStksingpqYVFRGRINTEVM.EVENVEDG.....tac  
IVHMGWVCEQTadardADAAHCCRFLALRG.....SALLIFRTPPwtqaeasfHLCEVLFKVHKL.wIAEDCWIQ.....t  
VFHKGFLKRKAgrtpwGKRSWKTFYAMLKG.....MVLYLQDDY...vkdgQGSDEVLSVHHA.LAEQALQY.....  
LKEQQQLIRQD.eflItFRKKKCYRHIFLQ.....DLILFSKTRK.tdigndtYIYKQSFKTSDI.GMTHNSGD.....  
IRHLGWLAECT...esERQSWKPVLVMLTE.....KDLLLFD SMP..rmrehwLTPHTYPLLAT.RLVHSGPD.....  
VMNDGYLEKRS...ngLLQLWKKKRCVLS...egLRLYGCKGDS.....GKEMRFEQMTTL.DCVEYKR-.....  
FMMEGCEMKKV...rSNSRMYNRYFLLD...dMRWLRWEPK.....kDSEKAKLEIKSI.kEVRLGKKT.....pv  
FLHSGKLYKAK.....--SNKELYGFLFN.....DFLLTQIIksakshlqyRMYKTIPLNEV.LVKLPTDP.....s  
LLKDGFMVELV.....EGARKLRHVFLFT.....DLLLLCAKLLkiggksqYDSKWYIPLSDL.TFQTAEESSlrseiqrerrank  
SMVDGSELRKV...rSNSRVYHRYFLDA...dmQSLRWEPK.....ESDKAKIDVKSI.kEVRTGKNT.....dtfi  
VCKEGQLRYLEddtisTAPQWQRCRLQVRRehasqrYLLELYDPPK.....dyRMPKISVHCSDI.kEIRRCNRL.....  
LIKEGHILKLA...aRNTSAMDRYLFLFN.....NMLLYCVPKF..slvgqkFTVRTRIGIEGM.NVKETFNE.....  
LVQEGTLKQLlgnhkaSIVSRKDLYIHLFN.....DLLLLSVRSG.....qrFLVQDHALFPDH.vRAEEIKTT.....  
DLSMGDLLLLYDpslmlkGKRDPPELAAFVFT.....AVFVCKDCSstlderdpFRFRHMISTDAL.QVRNLP SL.....  
TAYEGHLRVPK...ptgVKKGWQRVWAVVCD.....FKFLYELGE.gkgaqpgVVVNQVIDMRDE.EFSASSVL.....  
GTRKGYLSKKT...tENSKWHEKFFALYQ.....NVLFFYD TDQ.....sARPSGIYLLGEC.TCERV PAL.....kvst  
LNEQQQLIRQD.efwviFRKKRSLRRVFLFQ.....DVILFTKTKK...ndrgdDVVYVYKLSIKTC.EIGMTQSC.....  
LIYTGEMSWIY...qPYGRSQQRVFFLFD.....HQLVLCKKDL..irrdiLYYKGRIDMDRY.AVRDAIDG.....rc  
PEIQGFLHVRE...gGKKS WKLYFVLR...SGLYCSSKGQ...skepRHLQFTGDLEDL.NVFTVFTG.....  
LTAQGKLLQQDteqdsVLSRSKERRVFLFE.....QIVIFSELLR.kgsstpgYQFKKSIKVSYL.SMEEQVES.....  
ITAQGKLLQQDteqdssILSRAKERRVFLFE.....QLVIFSEPIDkkgfslpgYIFKNSIKISCL.GVEACVDG.....  
LIKEGQILKLA...aRNTSSMERYLFLFN.....NMLLYCVPKF..slvgrFTVRTRVRVEGM.KVLETSNE.....  
TAYKGFVRIPK...ptgVKKGWQRAYAVVCD.....CKFLYEVPE.gkstqpvVMASQVLDLRDE.EFSVSSVL.....  
VIYMSQIHMQS...sANEKEERYFMLFP.....NVIIMLSASP...rmsgFIYQGRLPLTGT.SVTKQPED.....  
VIYMSQIHMQS...sANEKEERYFMLFP.....NVIIMLSASP...rmsgFIYQGRLPLTGT.SVTKQPED.....  
LVLEGTFRIRQ...--AKNERTLFLFD.....KLLLITKKRE.....ETYSYKAHILCC.NLMLVEVI.....pKEF  
LLFEGTVNWKA...ASGRLKDILALLT.....DVLVLLQEKDqryvstvDNKPSVISLQKL.IVREVAHE.....  
VMEGTLARKHgnpkaPNRSWNNLYCVLKP.....GHLSIYKDAK.sfshsvtFHGEEPLTLNS.SCEILTNY.....  
TEYKSLIKRDvmtvyrQRIERLTVQVIMET.....RQVAWSRTA-.....NKTEGVLDIFEI.rEVRPGKNS.....kefdrfk  
LVCCQLHEVP.dpnprQRSVGHQREVFLFN.....DLLVVTKIFQ.kkksvtYSFRQSFPLVEM.QVHMFQNS.....

VDTSGYLNVLV.....-NTQWRSRWCSVKD.....RQLWIYSDKS.....kgKVAQQPLSLEGC..MVLDPDPS.....  
FVRQGS LIQVPgrlgsISLKKEGERQCFLFS.....KHLIICTRGS...ggklhLTKNGVVSLIDC..TLIEEPEG.....tddesk  
IESQGELILQEvdwvdkLIRKGRERHFLFE.....MSLIFSKEVK.dsngsrkYIYKSKLFTSEL..GVTEHVEG.....  
SRLEGWLAIPN..raniKRYGWKKQYVVVSS.....KKILFYNDEQ...dkeqSNPSMVLIDIDKL.fHVRPVTQG.....  
LKEQQQLVRQD.eftisYGRKKCQRHVFLFE.....DLVLFKPKR.iegglvYIYKHSFKTADV..GMTETSGE.....  
LVCCCQLYEVP.dpnprQRSVGHQREVFLFN.....DLLVVTKIFQ.kktsvtYSFRQSFPLVEM..QVHMFQNS.....  
LRAQGKLLQQDienensILSRPKERRVFLFE.....QLIILSEPMDkrqfslpgYVYKNSIKISCL..SIEDRCPE.....  
LIHSGELTRIV.....RPGKTQQRSYFLFD.....HQLVFCKKDV...lrrdiLHYRGRMDTDLL..EPSDLPDG.....rf  
PEIEGVLWLKE.....dGKKS WKRYFLLRA.....SGIYFVPGKG...akasRDLVCFLQLDHV..NVYYGQDY.....  
NHKKGPTRMKD.....mARFKPMQRHLFLHE.....RALLFCKKREeghrtasYSFKHCLMMSAV..GITENVKG.....  
PKGDGEVRLVS.....nLDKRRQRHIFLFD.....AAVIICKRRG.....dnYEMKEVIDLSHF..KITNNLAD.....k  
LIFSGDLTKIS.....qPQAKGQRMFFLFD.....HQLVFCKKDL...lrrdiLYYKGRLDMDMDEM..EVVDVEDG.....k  
FVRQGS LIQLPvrlgsISLKKEGERQCFLFT.....KHFLICTRSS..ggklhILKQGGVLSLIEC.tLIEEPDAN.....dedal  
FVRQGS LIQLPvrlgsISLKKEGERQCFLFT.....KHFLICTRSS..ggklhILKQGGVLSLIEC.tLIEEPDAN.....dedal  
LIKEGHIKKMS.....aKNGSAQDRYLILFN.....NMVLYCVPKL..rlmqgkFSVRERIDIAGM..EVHENVKQ.....  
LIKEGHILKLS.....aKNGTSQDRYLILFN.....DRLLYCVPKL..rlmqgkFGVRARIDVDGM..ELKETSSM.....  
IVAQGRLLLQDaepggLLNRMKERRVFLFE.....QIVIFSEPLDkrqfsmgYLYKYSIKVNL..GLEDSDVG.....  
LLEGALMKME.....GKESRMDVYCFLFT.....DVLITKPKV...rvekvKVIHQPLVIHNV..VCRELKD-.....  
TAYEGHVKVPK...plgVKKGWQRAIAVVCD.....FKLFLYDLPE.gkaaqpqVVVNQVIDMRDE..EFSVSPVL.....  
VLFMSQVIIQN...hGAEEKNERYLFLP.....HILLMLSASP...rmsgFIYQGGKPLTGM..SVSKTEDS.....  
VRKAGMLAVKNkrvepaAKRKWKQYWVSLKG.....CTLFFYETDG.rsgidhnSIHKHAVVWENS..IVQAVPEH.....  
FILEGALLRAG.....--AKHERHNFLFD.....GLMISCKANQpgagsgaeFRLKEKFLRKY..RIVDREDS.....  
GTRRGCLSKKS...sDNTKWHTKWFALLQ.....NMLFYFESES.....sSRPSGLYLLEGC..VCDRSPSP.....k  
PIRQGHFTAWEEipevkSSQRGHHRHVFLFK.....DCIVFCKPKRevghteaYIFKNKMKLSDI..DVKDTAEG.....  
LQMGSEMTVYQ...KRTERITVQVIMET.....MQVALTRSG-.....DRIVKVDISEL.kEVRQWETFkdfqrnengsafr  
LVCCSRLFEVT.dinkaQKQAAHQREVFLFN.....DLLVILKLCPC.kkksaaYTFCKTMGLLGM..QFHLFENE.....  
GHKKGPTRVKE...mARFKPMQRHLFLHE.....HALLFCKRREenadktpsYSFKHCLKMSAV..GITENVKG.....  
PEIQGFLYMKE...tGRKSWKKLYMFLRR.....SGLYFSTKGM...skpRHLQLLSDLEES..NIFTVTTG.....  
LIHEGALLWKT...aQGSRLKDVHVLLMT.....DVLVFMQEKD.qkyvfptLDKPSVLCLQNL..IVRDIANQ.....  
LVCCSRLYEVT.dvnkpQKQASHQREVFLFN.....DLVILKLCPC.kkksaatYTFCKAMGLLGM..QFHLFENE.....  
IKTLGSLVLYMSamvqnhGCEEKNERYLLLFP.....HVLLILSASP...rmsgFIYQGGKPLPLSGM..TVTPLEDC.....  
PEIQGYLYVKE...mGRKSWKKLYVFLRR.....SGLYFSTKGT...skpRHLQLLADLEDS..NVFTVITG.....  
PKGDSEVRVAS...vDKRAKQDRHIFLFD.....SAVIVCKRRG.....dnYEMKEVIDLHSF..KITNNPTS.....e  
EHKRGHVKVME...IARFKPMQRHLFLHE.....KALLFCKRREegyekapsYSFKQELSMAAI..GITEHAKG.....  
LIHEGTLLWKT...PSSRLKDVQVLLMT.....DILVFLQEKD.qrfifasLKSAAVSLQSL..LVRDIANQ.....  
LLHDGPLQLKN...TAGRLKDVHALLS.....DVLVFLQEKDqkyvfasIDQRATVISLQKL..IVREVAHE.....

---

VEKKGWLTQKQ...gRIKTWKKRWFILTA.....NCLLYYKTPQ.....dHEPCGIIPLENV..VVTIDPQ.....  
VIYSTVMKKAG...gNKKGFLSRLFLVLYK.....GFVIYKTKT...lltspEKPQGYIDLREC..DPSKVKTI.....l  
IKHEGFLTKEG...gGFKSWKKRWFILKG.....GDLSYKTKG.....eLVPLGVIHLNTS.gHIKNSDRK.....  
VSYSSIMKKAG...gNGKGFLLDRYFALHR.....NYILYKLGKsslkpddkQEPQGYINLMDC..NPDDTKEI.....  
ALKYGYLKKLG...gkgISKNWKKRFFILTK.....sGIFYFKHRT.....sKEPVGIIINLEEY.tKIYKDKS-.....-  
TIKEGSLVQKQ...gRIKNWKKRWCVLNE.....EGLHYFKSQH.....SIEKGSILLAEI.iSVEGDDKP.....e  
SDREGWLTQKQ...gSIRTWRRRWFVLKG.....KKLFYFKSKG.....dIEATGLIELEQN..SFVKEEKD.....  
ALIKGWLNKMT...sNEKTWQRRWFVLKN.....NCLYFKNK.....deDHPKVIIPLEGL..KVTLTSD-.....  
IVREGYLNKQK...hLRKNWLCRYFILTE.....TSLEYKDKG.....REFLNRIPLSEC..SITMAEIE.....il  
ALYSGWLQKKG...dkgVLLWKKRYFSVDR.....NSINYTDQT.....IQEQKGSISVSGI..EFTNASML.....  
IAKEGFLIKG...hIRRNWNVRWFQLKR.....NILTYSKTPN.....dIKLSGTIILSPE.sEIDIATNM.....K  
PDKEGELKKQK...hVVKNWKKRKFIQN.....DMLFYFKDKE.....ERPVGAVPLRMS..RCYENKSL.....  
DVFSGYLVKLG...aIRKNWLRHFVVRY.....dYSIDYFVDDK.....hTNKKGTINLCGY..SVNDDPNK..sgldrllkiaekr  
VLVSGWMRKTK...ANKWWEKRFFQLTQ.....NSLIYKEDP.....pQKTLGSIFLLVS..SCRIIKQK.....  
IVKQGYLTKK...aMRRNWTKRWFVLKQ.....GYLFYFKTSK.....dKPKGIIQLTNV..VVSRSY-.....

KIEGELIKRG.....hIFPSWRTRWFRIEN.....GFLLYFKSKN.....ePEPIDRVPLRGS..RVSKKPFH.....  
IVMQGYLTKIG.....eVVKNWKRRWFIFES.....NYLFYKNEQ.....sSKVLGIPLIGS..KIENIDQ-.....--  
-MYCGYIYKLG.....QFLYKKRYFEIYDnqphssSPKLCYYDNEN.....kKYKRGSIQDI.IYFNISKEY.....s  
ILLEGYLEKQG...ekglYKSYKNRYFSLAK.....ngFDLHYFESPPssstqsstALSLGYLDIRQV.tSIKKVDG-.....  
SKREGYVYKKG.....iIVKNWKRFRMFKFIG.....dDRLEYFKNEQ.....dKTPCGSISLHDC.gQIDSIQEL.....  
DSIQGYLFFKKGssllssSSTLWKKRWFSLEN.....gsTTLKYFKNSS.....dESPKGSINIQLI.eSIDILTTTttttttfngkndntn  
VIYQGLVWKRK.....-GFSIKKRQLILD.....tPRLIYDPPK.....MELKGEIPWSDS.iPKPKLSN-.....---  
PSKSGFLFKMN.....gLMKSWKTRWFSLER.....DVLFFYYKYNN.....dPKPQGELIILEI.kSIEILPKD.....kl  
VLHTGYLTKQG.....gRIQNWKIRWFVLR.....GTLSYYLSPI...nweyTKPRGVIYLTTK.tELKEVDHR.....  
VYLEGELGKKK.....EGKGWKRWMKLE.....HSLVYYKSSK.....dKEPLGIVNLNEC.qDCEVNKE-.....  
ETLRAYLSKKG.....hVVKNWKLRLFLVLP.....gsSYMEYFVDET...keqqHLPQGRVPLYGT..RVMEYVYN.....  
ATMEGELLKKS.....rFAAGWKKYFVLIG.....NHLHYFKTKK.....aRKPKGITISFI..TPPIPLK-.....-E  
PDKSGYLIKEG.....hVIRSWKKRYFVLKD.....GLIYFVKHQS.....dQEPTGMIPVIGS..QIKRIGET.....  
IVKEGNLKKKG...ggegGRRNWTVRWFVLR.....DSLSYYKKRK.....dTKPKGIKLSHS..KVETHSG-.....  
VLNEGFIQKKG.negffGSKMFQKRYFKIYE.....eGRLAYFKNQ.....dVSPIGVIEMKGA.IACEDMEG-.....  
GTKSDFITKKGrggstfGRKSWRLRWFVLSR.....fdKTLKYYSKQT.....dKEPSCSLILEGA..WLEEISPP.....  
PVREGYLKQD.....KKKSWKTRYFKLTD.....KYLWYKSPT.....aIKASGMIICKDY..HIKLAPST.....f  
SEFSNVLEKKH.....SEISWRSKFKYLN.....THLYYHRYSS..tespkePTKIKCINLILC..SVKLAQVV.....  
SSKEGWLYKRG...ddLLRIWKKRYFVLRD.....SSLFYFKHQ.....dNFPCGVILLNHG.tKLRASAS.....  
PILSGYLKQKG...dkglVRSFKRWFLQRD.....TKLFYKEG.....dSEPYGFVNLPEM.iNVKTVD-.....  
KDKSGNLLIME...dsdDQITWKGYYFVLVE.....RCLYKSSK.....MPPQGVITLKYT..DISVCDSP.....  
GVHSGYLFKKG.....hNFKSWRRRWFVLRD.....NILSYKSPK.....dTAPAGIIPINEI.vNIEIECEI.....sqe  
SDISGVLLKTK...nnNKRTKKERLCVIKY.....SRVLYFSETinstevkkRCKGLKFLDDC..KITEKGE-.....  
PEKRGFLNLRyisptiGGDNWNQRWCVLKE.....GCLFIYESNK.....dEIEIEVLSLDKG..QVKEKEI-.....  
YVLENYLYKKG.....-DFFWKKYWFVLT.....DSISWYKSSI...lketHYPNGTILLSKI.vTVDKLDPE.....t  
SDHKGWLKKYTssgtfrKTLQWKKRWVLRD.....LVLYYEGPE.....SNLKGKISIPNW..SVEIEKI.....  
PYFEGFIMRKRggglikGLKNWNKRWYSLRK.....NKLLYFKSKS.....dSTEMGCILMKTV.qTVRPCTEV.....  
IAANSKLKQDS.....----LKFHFILFQ.....TGLLKEKSH.....deLHVQYQYQIKDK.pIVLTVLQD.....vpsml  
IISGELYKKN...mLNIGWKKRFFILTA.....TSLIQSNSSS.....EQPKSEIILSNY..ILNITSDS.....SAK  
ILACGITEKRS.....-GLITKKRQLIITD.....tPRIFYVDPVK.....MTQKGEITVDGS.ISAQKSS-.....--K  
YWKAGWLTMR...dIIAGSNWKPRWVLRN.....ATAIYTCPT.....dpaSKPLESFYLSTV.rGVTKISKE.....  
CVKYGWIEKRC.gknqSFSSWKRWFVLRD.....SKLTYIYKEK.....nIKRSSTIGSTQE..FFKQQHGI.....  
KIYEGWMEYI.....-QKKWKKKWCVLRG.....IHLEYKGWWedqqgaqdSEECGKILLNYW.yTFSKPVL.....  
IIEGILLIKQT...kILKRWDPKYFCLLN.....sSLINFYDTTK.....TRVHRVYLDQI..SISYKMA.....tD  
IIKQGWKMKRG...tKNKSWKKRYFILDM.....kKTLRYKDN-.....SKIPHGNSNNS..GGGSSSNN.....  
PLKIGHLMKQQ...kiIKLWKRIYVLS.....DCLFFYKPIAnnlnnsiINPIGTVDLRDI.vSVTQVSLT.....kqtkisfss  
PTKQGILFKKS...rYLKEWRNRFFVIEE.....DILYFDIEKgnnsnkpIGTPLGIFNLLNC..SFTLITNE.....  
DETSGYLKKKS...aFKEEWKPRWFVFKK.....PYLYSHNQK.....dTHLKKIDLTNS..SVAITQDE.....  
ISKEGYLVRKA.....-TTSWKKQYFIIQS.....NLLRYKTKP...skkgKLPKETLDLIGT..DIQSSTI-.....-A  
KVEGHLMKKS...kqVMGGWNKCWVLRD.....GMLYCYKGGK.....eFHPENALNILLC..SVRVPQVI.....stsspmt  
LIREATFGELT...eeKDKISGRMHYYLFN.....DIIMRTQKDK.....kSIRLETFLIAS..TNVDGEEN.....rgs  
DYKGLINRSN...gKNKGWKKVWLVLNG.....QNLKSYQSEL.....eiDTVLYEIQKDI.eTITTEEQP.....  
VIEGNLTEL...pgILWNSNTEKWWYVSE.....GMLYSYKNSK...lkqLDPLETHLEKA.iSAHKTKEI.....f  
ITFSGYLKKS...kSKPEWNYKWFVLRD...tneHVLWYDSDR.....dPSPINGIRLSNA..YIRECECG.....  
TIKSGNLYKKG...kINKSWQKRWCMKSK.....dSKLFYHKQAN.....EKHSGFVDLRQC..IIKQSDCT.....  
INQEGILDFVK...ksSLKWKNRVLRD.....GGIYIKTDK.....DEDFKCIDLEFS..VLDSNPKE.....a  
IKKGYLFKEG...kKLSMSKYFFKASR.....GNLSYCKNES.....nKSKVKSILSEQ.iQLAIPHNV.....h  
FITEGIVKQEI...egwLFNSYENRYLKV.....DKIYCFNED...saqalWDSVPLNIKVV..DIYDEDEN.....ts  
KEHQGYLFKTS.spsnNSSDWKKYLFVYKN.....DVLTYKVS...knkRKEKGIIDLFS.vKQESRPK-.....  
GFKKGYLVGQ...gkLISKWKQRWVLRD.....ESISYKSQE.qqetskKEPKSIQIFC..SAKVVKST.....  
LVKEGTLMSGGliqpgqTQQQYQYFILLT.....DILLYCKKQTsssssgnkYKFIGKFDLKNM..DIKNITDM.....

LVKEGTLMSGGliqpggTQQQQYQYYFILLT.....DILLYCKKQTsssssgnkYKFIGKFDLKNM..DIKNITDM.....  
ATMTGFLYKMG....qLNKEWKKRFFFIQG.....TNLYYATLKEfekgtidsVTPTGSMPLERC..RIDQSPHS.....  
FVTEGALTLKK.....----DKYYVFLFT.....DAMILTKPGK.....ekKKFKNIINLSTA..SLNTTDE-.....--QN  
AVKKGWLNIRV...kgkVTDKWSRKWCVLSD.....GTLYFFRKP-.....TDPSPVRYLRDT..VITSKEI.....  
FIYEGTLTKVC.....RKACKKRWFVFLFS.....DILVYGSSIP.....pkLLLHEKIELDHC..RIEDIPDG.....nlggsssisln  
FVREGGLMKVC.....RKEDKFRWFFLFS.....DALMYCTSTNlptsnhsFTFHRLMLLSDI.nKIRDVKDR.....  
FIREGSLTKVC.....RKDHKKRWFILFS.....DALVYGNRID.tavgnpYKFHRLPLSNT..KIANLDDT.....  
LFKKGYLKRS.....EYNSYTRKFFELSN.....GKLSYYKTGN.....dTSPSHTHDLFLT..TVRIREDL.....  
LIKDGLMMESR.....QKKVSKYRYFILFN.....DLLFITKQKK.....nkYSIYKTIPLIDL..KVLEVPQS.....ante  
ILKECWVRIKE...gkNDNDNHRYIFLFN.....DNIMFTKNSS...ftkYQYQYSFSLPYH..STKLLPSV.....  
FIREGAVHFGS...ssgSFKDKDPIVFLFND.....MVMMTIKHPN...kpneYKYRYSCQFSTT.tTIEELPS-.....  
FLKEGDLKKIS.....DRVVNTRHFFLFN.....DLLIYCKKER.....kntYRFKASFPLLC..VVKDIPDT.....c  
YVREGMLTESG.....KGSNSNQYCYFLFN.....DIFVLSTPIK...ksnqFSFKKISLSEA..EVTMISDP.....  
YVYEGYILVGD.....VSSKSKRVYVFLFN.....DILIFSPTT.....nkiFNSKTKFKFLKC.eDLFPSPML.....tdipi  
FLKEGILIEQF.....NNQRISYYTFLFS.....DIILFTEKIEmmaydgsfYLLKKLERIVNI..QVDDPELG.....ff  
FVRESQCNISA.....nKKSESGGFYFFFN.....DMVLVTKKSS...lfsnYKYVYTIPLKNA..DIKDISS-.....  
FIKEGLVSKKL.....--DKELLRCILLN.....DVLILAKNKK.....snSTVKLIVYLENI..LIRDSIDS.....lpGYKE  
DIYGGYLYVKF....kaEGSYKYYFNLLT.....NAKVLHQREEskksnnnNVAIKILNLKRF..SLTRGNQF.....  
LLMEGTVSAVK...eINSEDSLSRTLFLFN.....NLILCSFGTinqfktkLKLKAKIPISDS..RLIFVSDT.....d  
FKIGLTILKIS...skGKPQKKLIFDLAR.....NQIVCGKKK-.....----KVNFEI.dEIRVGHKT.....nifnqfksknlkedi

---

PDKEGWLWKQG....gRYKSWKRRWFILND.....NCLYFFEYTT.....dKEPRGIIPLENI..SVREIHDR.....  
VVKEGWLMKRG....eHIKNWRQRYFVLHS.....dGRLMGYRSKPadastpsDFLLNNFTVRGC..QIMTVDRP.....  
VVKSGSMVKRAqknkrTPVNYKHRWFELTK.....RTFSYFDVEN....verRRERGRHILKGV.rLVEEATVS.....  
VTLSGWLHKQG....sdGLKVWRKRWFLAE.....YCLYYYKGPE.....eEKLLGSVLLPSY..RVSACLPE.....  
HSCRGYLHKLK....aTFHAWSRWFVLDLDR....qrSALIYSDKS.....eRKPRGGAYFATI.dEVYLDHLN.....  
GDIQGHLYRRK..knhrGVTYWARIYFVMLD.....TILYGFERSKQ.....sTSASLVIFLPGF..TVSLAKEV.....  
RTHEGHLYKRG....aLLKGWKQRWFVLDLDS.....ikHQLRYDYDTSE.....dTAPKGIIEAEV.qSVTAAQPA.....  
LEKMGLAKLG....gKLKTWRKRWFLKN.....GSLNYWKSQH....dvqRKPQQQIQLDEV.cRINRAEG-.....  
-----MFDIKTPKR.....-T  
EVCCKPLWHMF.....-----KPPA.....aYECKRCRNKIHK.eHVDKHDP-.....--LAPCKLN  
PIFSGYLWRQsqakgapNSKKWRRWFSLRP.....dNCLYYYKTED.....dSQVGMAMIMAKH..TVDLCPVD.....  
LLKEGLMTKYP..tskrFGRQFKQRHFRLTT.....HLSYAKSKG.....KQPICDIPLQEI.aSVEQLKDK.....|  
ALKEGWLVHYT....sLDKAVKRYWRWLDLDS.....KTITLFVSEQ.....gSKYHKELPLAEL.ISIESHLGD.....  
PIKQGYLYKRS...skSLNKEWKKKYVTLCD.....dGRLTYHPSLH....dymdDVHGKEIPLQYV..TVKVPGQK.....  
VEYKGLTMEF...disGFGAWHRRWCYLNG.....SVINYWKYPD....dekrKTPMGSIDLNSC..TSQKVTTA.....  
FDMEGFLNKRK....eVNKAQRRYFVLKG.....NLLFYFESRL.....dKEPLGLIIVEGC..TIELSNEV.....  
TFIAGEVANAG.....-----NKLEAQTNP-.....-VKKRHRMKSS..SVKANEAD.....dNDGYE  
VSKCGYLFVAPfnsnplyRTKRWQRRWFVLYD.....dGELTYSVDDY.....peTIPQACVDMTKV.IEVTSAVEV.....  
MALSGYLKCLK.....--TMKKKFFVLYE.etstaARLEYDYDEK...kflqrAEPKRVIYLNKC.fNINRRLDL.....  
LIHDGNLTIKknpsvqIHGLLFENMIVLLTK.....qDDKYLLKLNHplsitnkpVSPIMSIDADTL..IRQEAD-.....  
SKKSNPLKRTK...svtKLERTKRGSGGLRG.....SRSHESLLSS.....HAVMSTIDLSCT.gAVGVAPVH.....  
IEYMGWVNEGV.innniSWQSYKPRFLLKLG.....TEVMLFETPP..InvagiSKALVVYKVYQT..MFRIVKES.....  
LERGTIVTKLY....gKQRRPDRRHLMIR.....etRQLLWATVAT...qtpTRDYEGAIQLREI.rEIRVGKHS.....kefrifa  
GTLEGTLSKWT....nVMKGWQYRFFVLDE.....naGLLSYYSKSD....kmikGVRGCVRLKDA..LIGIDDQ-.....  
IKHHGHLNKKs....dKTTKWKQLYFALIN....dgseTQLCFYDNPK.....kTKPKGLIDLSCA..YLYQCHDS.....  
PDCFGYLLKLG....sRWCGWSKRYCVLKD.....ACLIFYQDAN.....sKSAFGMACLHGY..KVASMSAN.....  
TAYEGYVKVPK....sgvIKRGWIRQFVVVCD.....FKLFLYDISP.....dRCALPSVSVSQV.IDMRDPEFS.....vgsvr  
PMIEGQLKEKK..gkwrLFRWRTRYFTLSG.....AHLSCKGSS-.....--GGESIDVNQI..RSVKVSRG.....  
ITKQGYLLKGPmrfaniGNKSFKRRYCYLRQ..eidgtYILELHKDEK.....qGEAKATIVMDFC.tDVVQNPKR.....  
CRKEGTVNNLTslsqptGSQKWEKRLVLVK...avggYMLEFYTPHK....atkpRSGVFCFLISEA.rETTALEMP.....  
FLNEGALIELD....snDYRPIQRVFFFLFN.....DVLIVCKVKH....dkrLDFLTEYDPKKI..AVINIKDL.....dC

SVVAGELVSPSSsessdESDKWLPFVAVTE.....REFRIYESAP..wsveawSRPLEIYALATT..RLAGAGNN.....  
VIRKGHMVIQN...lgiMKGGSRPYWVFLTS.....ESISWYKDED.....eKEKKFMLPLDGL..KLRDIEQG.....  
SVFEGWLSVPN.kqnrRGGHWKRQYVIVSS.....RKIIFYNSDI...dkhntTDAVLILDLSKV.yHVRSVTQG.....  
LVGEGVLTkMC.....-RKRPKSRQFFLFN.....DILVYGNIVI...gkkkYnkQHIMPLEEV..SLESIADN.....  
VIKEGVLQKIT.....HGKTEIKRYCVLMS.....DIFMYCKMIKpntvvensLECCIFPLKKC..KVYEML--.....  
CYCRLYEIPDV...nkKERPGVHQREVFLFN.....DLLVITKIFS.kkksvtYTFRNSFPLCGT..VVTLLDMP.....  
MKHCGYLYAIG...ksVWKKWKRRYFVLVQ..vsqytFAMCSYKEKK.....SEPSEMMQLDGY..TVDYIEAA.....  
PSMKGFLMHRRistsaaNRIFWQPGYFLLKA.....GVLYMFNDST.....qRLPSWAMALAEQ.qGARRTVKS.....  
LKLCGQLSKYT...nVMKGWQYRWFTVDA.....ktGSLSYLCLDSapsphvlaSAPRGQVQLAGA..VVYPSDE-.....  
PEMKGWLLKWT...nYIKGYQRRWFVLSK.....GVLSYRNQS.....einHTCRGTISLHGA..LIHTVDS-.....  
FTKRGYLFLME...kpkFKATWTKYYCTFKK...qkreFTMLQFNQMN.hnfrpeARDDEKLTFLFSC..QRRASEFE.....  
STKYGQLQRIV...pkriFFDQTRKCYCGILN.....DWMLCYADGP.....taCRPSSSTLYLKSS..SIEIEHFG.....  
LNISDFLGKIK.....KGLLHAMCFVFKS.....AVFLCKERLnatneveilRYQVLIPVTEV..QVRASSAK.....  
ILKKGfVnKRK.....-----GLFA.....rKRMLLTGTP.....rLIYIDPVQMIKK.gEIPWSPDL.....rAEYKN  
IVLADWLKVRG.....TLKSWTKLWCVLKP.....GLLLIYKSQK....tkshWVGTVMMLTSC..QVIERPSK.....  
KGKEGVILKRTyfcsvVCGTWRNRWFFVKE.....TCFGYIRPTD.....GSIRAVILFDQG..FDVSTGIY.....  
VTRQGHLLKKS...egkVRRVWQKRRRCRVTS.....dGFLDIFHADE.....SKPPTRVNLLTC..QIKPVPD-.....  
VEIQGSLERKHsggkkaPVRSWKQFHTVLCG.....QLVCFKDEN...dfqqKTATAPVNILGA..K CERADDY.....  
IELRGYLSKWT...nYIYGWQPRYIVLKD.....GTLSYKSES.....esdFGCRGAISLTKA..TIKAHES-.....  
LQMDGPLYMKKA...dPKKGWKRYHFVLSR.....SGLYFPKE-.....-KTKNTRDLACL..NLFHGHNV.....ytlglw  
NKIEGYLFKKK...skGFKTWCRWFYLSL.....NQLVYSLDLScrksnedSFSVMEEDLRIC..SVRPVNEG.....  
TRFSGYLNVD...pkSQHNWNRWCSLDG.....VRLSVWQHED...nlesDIPIFTLELPLG.gQSLIAAAP.....  
NAKKGWLMKQD...nRTCEWSKHWFTLSG.....AALFYRDPL...ceerGVLDGVLVDVNSL.tSVIPEPAA.....  
AAMHGCVRRKtkegrkAVASWQRYWLQIWA.....NSLVYFPPKSgserndfkREPCKVCPLDGW..YAHVSDNT.....  
HQLSGYLLRKF...kNSSGWQLWVFTS.....FCLYFYKSYQ.....dEFALASLPLLYG..TVGPPGHQ.....  
LIRQGCLLKHS.....KRGLQQRMFLLFS.....DLLLLYGSKSP...ldqsFRILGHVPVRSL..-LTENAE-.....  
FDKEGLLITDegflwrSSEVRVERWCKLRG.....NLLFYLDKDKD...pkSAVAGLLVLENC..RARIQNEE.....  
LLLDELHIKA...hEDQTKLRYAFVFD.....KILIMVKALH.iktgdmqYTYRDSHNLADY..RVEQSHSR.....  
PIKRGLLWQQR...drLFSRWKERYFVLTR.....DYLHCFKRASanerasdmGQFIFKVKLVLDV.eKVEWLNRR.....  
VDKLGEVVLQDawdtkqIRKGRERRVFLFE.....LYLLFAKEVK..esnvkYQFKSKLMTTDM..GITEHIEG.....  
LQDGEKfirWD...dDSGTGTPVTMRVDA.....KGFFLYWVDQ.....NNELDILDIATI..RDVRTGQY.....akrpkdnkl  
EYKKGyVMRKCfktkpfGKRswkMFYCTLRD.....LVLYLHKDEHgrksqmsDNLHNairiHHA..LAtKANDY.....  
LSTLGDIIHMG...svaVGADHRDRYFVLP.....QTLFLSVSQ...rmsaFIYEGKLPLTGI..IVNRLEDT.....  
LVKRGELTHLLakltfgKRLTKISYAFVLS.....DLLLLCKRRG.escfsvfDYCPRSMMLTAA..GDSLPQLP.....t  
EGHEGYVTRKHsttkkaSNRSWdkVYMAAKA.....GRISFYKDQKyksnpeltFRGEPsyDLQNA..AIEIASDY.....  
CILHGyIKKLG...gsFASLWQTKYAKLYP.....NRLELHSESG.....NNKPELIFMDQV..EDISSDFI.....ll  
LRQEGLLMEQH.....---NKQRLVLLFA.....TMLITKQKE.....dGRLQFKTYISQN..NLMLSEHL.....pC  
ITAQGSLLMQGmncvvdAAQKHRELQVFLFQ.....QIIIFADIEKknqyaspiFKYRSHIQLNHM..QMkELGD-.....  
VRKAGFLSVKKhqielarKRGWkGYWVCLKG.....TTLLFYPCDS.regsvveAAPKHLIIVDGA..IMQPIPEH.....  
DFERDALFKVD.....-----EYGFfLYWksegdgdVIELCQVSD...iragGTPKDPKILDKV..TKKNGTNI.....|  
LRQNEFLVWQG.....RGGKTLRQVFLFE.....ELVLFskARRpdhknldiYIYKNSIKTSDI..GLTAHTGD.....  
SSNRSFILKCEnelsdsLSGRGDslVLYLFS.....DSIELCKRRSkspstaktHKHLKLISLNTI..RLVIDISD.....  
HLHSARFFLQVdatrqQNLWNSSYTLFLFD.....NQLVYCKRDI...ikrshFIYKGRIFLDRC..RVVNVrdG.....  
LAKQGELLMQDskkdirLRMKPKRRHIFLYQ.....KSLLLCKQTSksgynkssYQFKSDVKMSQI..GLTESVSG.....  
FIREDSLskLG...sGKRIWSErKVFLFD.....GLMVLCANTsagatayYRLKEKYFMRRV..DINDRPDS.....  
PDREGWLLKLG...gRVKtWKRRWFILTD.....NCLYFFEYTT.....dKEPRGIIPLENL..SIREVEDP.....  
PDREGWLLKLG...gRVKtWKRRWFILTD.....NCLYFFEYTT.....dKEPRGIIPLENL..SIREVEDS.....  
PDREGWLLKLG...gRVKtWKRRWFILTD.....NCLYFFEYTT.....dKEPRGIIPQENL..SIREVDDP.....  
PDREGWLLKLG...gRVKtWKRRWFILTD.....NCLYFFEFTT.....dKEPRGIIPLENL..SVQKVDDP.....  
IVKEGWLHKRG...eYIKtWRPRYFLLKN.....dGTFIGYKERP..qdvdrEAPLNNFSVAQC..QLMKTERP.....  
IVKEGWVQKRG...eYIKNWRPRYFLLKT.....dGSFIGYKEKP...qdvdlIPYPLNNFSVAKC..QLMKTERP.....

VIKEGWLHKRG.....eYIKTWRPRYFLLKS.....dGSFIGYKERP..eapdqtLPPLNFSVAEC..QLMKTERP.....  
CCCRGPLVKMG.....gRIKTWRKRWFVCFDR.....qaRRLAYYADKE.....eTKLKGVIYFQAI.eEVYYDHLR.....  
KTCRGFLIKMG.....gKIKTWWKRWVDFDR.....nkRTFSYYADKH.....eTKLKGVIYFQAI.eEVYYDHLK.....  
HLKEGEMYKRAqgrtriGKKNFKKRWFLTS.....RELTYHKQPG.....KDAIYTIPVKNI.IAVEKLEES.....  
KVCRGYLVKMG.....gKIKSWKKRWVDFDR.....IkRTLSYYVDKH.....eTKLKGVIYFQAI.eEVYYDHLR.....saakr  
TILEEILIKRSqqqkkktSPLNYKERLFLTK.....SMLTYEYGRA.....ekKYRKGFIIDVSKI..KCVEIVKN.....ddg  
VLKEGFMIKRAqgrkrfGMKNFKKRWFLTN.....HEFTYHKSkg.....DQPLYSIPIENI.IAVEKLEEE.....  
VVCSGWLKSP.pekkIKRYAWKRRWFVLRsgrtgdpDVLEYYKNDH.....aKKPIRIIDLNLc.qQVDAGLTF.....  
VILESIFLKRsqqqkkktSPLNFKKRLFLLTV.....HKLSYIEYDF...ergrrGSKKGSIDVEKI..TCVETVVPeknpPPERqprgr  
VVCTGWLKSP.pekkIRRYAWKKRWFILRSgrmsgdpDVLEYYKNDH.....sKKPLRIINLNFc.eQVDAGLTF.....  
AVCTGWLKSP.perkiQRYAWKRWVLRrgrmsgdpDVLEYYRKNH.....sSKPIRVIDLSEC..AVWKHVGP.....  
PVQKGFLKRR.....kwPLKGWHKRFFYLDK.....GILKYAKSQT...dierEKLHGICIDV-GL..SVMSVKK-.....  
ILLEEQLIKRSqqqrrtSPSNFKVRFVLTk.....ASLAFEDRH.....gkRRTLKGSIELSRI..KCVEIVKS.....disi  
VLYSGWLKSP.pekkIRLFAWRKRWFILRRgqtssdpDVLEYYKNDG.....sKKPLRTINLNLc.eQLDQDVTL.....  
VIKAGYCVKQG.....aVMKNWKRYYFQLDE.....NTIGYFKSEL.....eKEPLRVIPLKEV.hKVQECKQS.....  
VAKAGYLHKKG..gtqLQLLKWPLRFVIIHK.....RCVYYFKSST.....sASPQGAFSLSGY.nRVMRAAEE.....  
DKHEGFMLKKR.....kwPLKGWHKRFFVLDN.....GMLKYSKAPL...diqGKVVHGSIDV-GL..SVMSIKK-.....  
GTKEGYLTKQG.....gLVKTWKTRWFTLHR.....NELKYFKDQ-.....-MSPEPIRILDl.tECSAVQFD.....  
GTKEGYLTKQG.....gLVKTWKTRWFTLHR.....NELKYFKDQ-.....-MSPEPIRILDl.tECSAVQFD.....  
VLKEGFLVKRG.....hIVHNWKARWFILRQ.....NTLVYYKLEG...grrvTPPKGRILLDGC..TITCPCLE.....  
LIKSGYCVKQG.....nVRKSWKRRFFALDD.....FTICYFKCEQ.....dREPLRTIFLKDVIKTHECLVKS.....  
ERQEGHLLKKR...kwPLKGWHKRYFVLED.....GILHYATTRQ...ditkGKLHGSIIDVRLS..VMSINKK-.....  
VVKQGYLAKQG.....hKRKNWKRVRVFLRK.....dpAFLHYDPSK.....eeNRPVGGFSLRGS..LVSALEDN.....  
SILEELLLKRSqqqkkkmSPNNYKERLFLTK.....TNLSYIEYDK.....mkrGSRKGSIEIKKI..RCVEKVNl.....  
ILKMGVVDKRR.....-GLFARRRQLLLTE.....gPHLYYDVPVN.....KVLKGEIPWSQE.IRPEAKNF-.....  
VLKQGYLWKRg.....hLRRNWAERWFQLQP.....SCLCYFGSEE.....cKEKRGIIPLDAH.cCVELPDR.....  
IVKKGYLLKKG.....KGKRWNLYFILEG.....sdAQLIYFESEK.....raTKPKGLIDL SVC..SVYVHDS.....  
ALKQGWLHKKGggsstlSRRNWKKRWVFLRQ.....SKLMYFENDS.....eEKLKGTVEVRTA.keIIDNTT-.....  
VCKQDYFIKSPpsqfsvTWSWKKRFFILSK..ageksFSLSYYKDH-.....-HHRGSIEIDQN.sSVEVGISS.....  
CDLWDQLHLRS.rqgggRVKTWKRRWFILTD.....NCLYFFEYt-.....-----.....  
RIREGYLVKKG.....svFNTWKPMWVVLLE.....DGIEFYKKS.....dNSPKGMIPLKGS..TLTSPCQD.....  
GDCEGWLWKKK.daksyFSQKWKKYWFVLKD.....ASLYWYINEE.....dEKAEGFISLPEF..KIDRASEC.....  
IIKQGCLLQGG.....hRRKNWKRKFIILRE.....dpAYLHYDPAG.....aEDPLGAIHLRGC..VVTSVESN.....  
LEKSGYLLKMS.....gKVKSWKRRWFVLKG.....CELLYYKSPS.....dviRKPKQGHIELSAS.cSILRGDN-.....  
RSFEGTLYKRG.....aLLKGWKPRWFVLDV.....tkHQLRYDSDGE.....dTSCKGHIDLAEV..EMVIPAGP.....  
VTKAGWLFKQA...ssGVKQWNKRWFVLDV.....RCLFYKDEK.....eESILGSIPLLSF..RVAAVQPS.....  
IQLSGMYNVRK.gkmqIPVNRWTRRQVILCG.....TCLIVSSVKD.....sITGKMHVPLIGG..KVEEVKK-.....  
KVKSGWLDKLS...pqGKRMFQKRWVFDG.....LSISYNNK.....eMYSKGIPLSAI..STVRVQG-.....  
VCKRGYLRKQK.....---HGHRRYFVLKL.etadapARLEYENARsgaaiplIPRRVITLYQC.fSVSQRADA.....  
VVVRGWLHKQD...ssGMRLWKRWFVLAD.....YCLFYKDSR.....eEAVLGSIPPSY..VISVPAPE.....  
PYFHSFLYMKG...gLMNSWKRRWCVLKD.....ETFLWFRSKQ.....EALKQGWLHKKG.gGSSTLSRR.....  
SSMSGYLRSK...gNKKPWKHFVFIKN.....KVLTYAASE.....dVAALESQPLLGF..TVIQVKDE.....  
RSYEGTLYKKG...aFMKPWKARWFVLDK...tkHQLRYDHRV.....dTECKGVIDLAEV..EAVAPGTP.....  
VRKCGYLRKQK.....---HGHRFFVLRGggsapqpPRLEYESEK..kwrkaGAPKRVIALDCC.ININKRADA.....  
VEERGFLTIFE...dvsGFGAWHRRWCVLSG.....NCISYWTYPD...dekrKNPIGRINLANC..TSRQIEPA.....  
AIKCGWLKQGG...gFVKTWHTRWVFLKG.....DQLYFKDED.....eTKPLGTIFLPGN..KVSEHPCN.....  
VDNAGFLYKKG...gRHAAYHRRWFVLRG.....NMLFYFEDAA.....sREPVGVIILEGC..TVELVEAA.....  
LEKSGYLLKMG...sQVKTWKRRWFVLRQ.....GQIMYYKSPS.....dviRKPKQGQVDLNSR.cQIVRGEG-.....  
VIKQGWLHKANstivTMKVFKRRYFYLTQ...lpdgsYILNSYKDEK.....nsKESKGCYILDAC.iDVVQCPKM.....  
PIKQGMILLKRS...gkWLKTWKKKYVTLCS.....nGVLTYSSSLG...dymkYIHKKEIDLQTS..TIKVPKG-.....  
YLKQGFMEKTG...pkQKEPFKRWVFLDC...heRRLLYYKNPL.....dAFEQQQVFLGNK.eQGYEAYED.....



VVRRGWLYKQD...stGMKLWKKRWFVLSL.....LCLFYRDEK.....eEGILGSILLPSF..QIALLTSE.....  
KRYEGPLWKSS.....RFFGWRLFVVLEH.....GVLSWYRKQP...davhniYRQGCKHLTQA..VCTVKST-.....  
PTVKGWLTkVK.....-HGHSKVWCALVG.....KIFYYSRSE.....dKRPLGCLPVRDA..HIEEVDRS.....cdsded  
KKLCGYLSKFG...gkgPIRGWKSRRFFYDE.....rkCQLYYSRTAQ.....dANPLDSIDLSSA..VFDCKADA.....  
PDCDGWLLLRK.apggfMGPRWRRRWFVLLG.....HTLYWYRQPQ.....dEKA EGLINVSNY..SLESGHDQ.....  
DACA KPLWHVF.....-KPPPALECRRC..HVKCHRDH.....ldkkeDLICPCKVS  
PTMKGLLTKVK.....-HGYSKRWVCTLIG.....KTLYYFRSQE.....dKFPLGQIKLWEV..KVEEVDRS.....cdsded  
DACA KPLWHVF.....-KPPPALECRRC..HVKCHRDH.....ldkkeDLICPCKVS  
VLKQGYMMKKG.....hRRKNWTERWFVLPK.....NIISSYYVSED.....IKDKKGDILLDEN.cCVESLPDK.....  
YLKEGYMEKTG...pkQTEGFRKRWFTMDD.....RRLMYFKDPL.....dAFARGEVFIGSK..ESGYTVLH.....  
ADCQGWLYKkk.ekgsfLSNKWKKFWVILKG.....SSLYWYSNQM.....aEKADGFVNLPDF..TVERASEC.....  
SAISGYLSRCK.....rGKRHWKLLWFVIK.....KVLTYMASE.....dKVALESMPLLGF..TIAPEKEE.....  
VQLYGVWKRK...fgrPSAKWSRRFFIIE.....SFLYYSESEfetnkyfniHPKGVIPLGCC..LVEPKEEP.....  
NGLSKDMDTGL.....G.....DSICFSPSIS..sttspkLNPPPSPHANKK..KHLKKKS-.....--TNNF  
FVKSGWLLRQS...tilKRWKNWFDLWS.....dGHLYYDDQT.....rqniEDKVHMPMDCI..NIRTGQEC.....r  
WTMEGYLYVQE...krgLGF TWIKHYCTYDK.gskftfMSVSEMKSSG.....kMGSPFMFKLKS..IRRKTDSI.....  
LDKAGVLHRTKdkgkrIRKHHWSASWTVLEG.....GVLTFKDSKglrqpkskfSTPEYTVELGA..TLWAPKD.....  
VRKVGYLKPK.....-SMHKRFFVLR AaseaggpARLEYEENEK..kwrhksSAPKRSIPLESC.fNINKRADS.....  
LKKGTkFVKWD.....-DDSTIVTPIILRT...dpqGFFFYWTDQN.....keTELLDSL VKDA..RCGRHAKA.....pkdpkr  
ANKKKHLKKKS.....T.....NNL--KDD-.....GL..SSTAE--.....--EEKFMIVSvTG..  
FIVRGWLHKEVknspkmSSLKLLKRWFVLTH.....NSLDYYKSSE.....knALKLGT LVLNSL.cSVVPPDEK.....  
VVHMGWVNEKL..qgadSSQTFRPKFLALKG.....PSFYVFSTPP..vstfdwVRAERTYHLCEV..LFKVHKFW.....ltdcv  
AVKQGFYLYLQ...qqtFGKKWRRFGASLYG.gsdcalARLELQEGPE...kprrcEAARKVIRLSDC.IRVAEAGGE.....  
PIKQGMLLKRS...gkWLKTWKKKYVTLCS.....nGVLTYSSLG...dymkNIHKKEIDLQTS..TIKVPKWPslatsactpis  
AMLRGSRLRKI...rSRTWHKERLYRLQE.....DGLSVWFQRR.....iprAPSQHIFVQHI.eAVREGHQ.....e  
IVYMGWCEARE...qdpIQDRVYSPTFLALRG.....SCLYKFLAPP..vttwdwTRAECTFSVYEI..MCKILKDS.....  
PLLSGWLDKLS...pqGNYVFQRRFVQFNG.....RSLMYFGSDK.....dPFPKGVIPLTAL..EMTRSSK-.....  
IVVKGWLYREPrgggarPWLPPRRAWFVLR.....DSL DQFSSSG.....kgARRLGSLVLTSL.cSVTGPER.....  
PSISSTTSPKLpppsphANRKKHRR-----.....KKSTSNFKADGL..SGTAEQE.....-ENFE  
DAFAGFLNQQQ...mveGLISWRRLYCVLRG.....GKLYCFYSPE...eieakVEPALVVPINKE.tRIRAMDKD.....  
PIKMGWLKQR...sIVKNWQQRYFVLR.....QQLYYKDEE.....dTKPQGCMYLPGC..TIKEIATN.....  
NGLSKDMDIGL.....G.....DSICFSPSIS..sttspkLNPPPSPHANKK..KHLKKKS-.....--TNNF  
VLKEGVLEKRS...ggLLQLWKRKRCVLTE.....RGLQLFEAKG...tgrPKELSFARIKAV..ECVESTG-.....  
HNVRGLLRLK.....-EKKARLEP...rdgpPSALGSRES-.....LATLSELDLGAER.DVRIWPLH.....psll  
ILKEGPMLKNC...nSFKRWKLRYFLVQG.....QKLYFAHHPA.....FAHFETIDLSQA..TVAESSC.....  
SLMCSFLQLIG...dkWGKSGPRGWCVIPR...ddpLVLYVYAAPQ.....dMRAHTSIPLLYG..QVTVGPQG.....  
IIEGMLTKQN...nSFQRSKRRYFKLRG.....RTLYYAKTAK.....SIIFDEVLTDA..SVAESSTK.....  
ITKHGWLYKGNsaisvTMRSFKRRFFHLIQ..lgdgsYNLNFYKDEK.....isKEPKGSIFLDSC.mGVVQNNKV.....  
PIKQGMLLKRS...gksLNKEWKKKYVTLCD.....nGVLTYHPSLH...dymqNVHGKEIDLRT..TVKVPKGR.....ppral  
PLRTGMLELRG.....-HKAKVFAALSP.....GELALYKSEQ...afsiGIGICFIELQGC..SVRETks-.....--  
VSHSGFLYKTAAllqdrAREEFsRRWCVLGD.....GVLSYFENER.....aVTPNGEIRASEI..VCLAVPPP.....  
VIKAGWLDKNP...pqGSYIYQKRWVRLDT.....DHLRYFDSNK.....dAYSkrFISVACI..SHVAAIG-.....  
IVMEGYLFKRA...snAFKTNRRWFVLSL.....NQLVYQKKFK.....dNPTVVVEDLRLC..TVKHCEDI.....  
NQLSGYLLRKF...kNSHGWQKLWVFTN.....FCLFFYKTHQ.....dDYPLASLPLLYG..SVSIPREA.....  
PIYGGWLLLAPfdnpvhRSRKWQRRFFILYE.....HGLLRYALDE...mptTLPQGTINMNQC.tDVVDGEGR.....  
ITKEGMLHYKA.gtsyIGKEHWKTCFVLSN.....GILYQYDRT.....dVIPLLSVNMGGE..QCGGCRA.....  
VLKAGYLEKRR.kdhsfLGF EWQKRWCALSK.....TVFYGGSDK.....dKQKGEFAIDGY..SVRMNNTL.....  
--MEGVLYKWT...nYLTGWQPRWFVLDN.....GILSYYSQD...dvcKGSKGSIKMAVC..EIKVHSA-.....  
SIMEGPLSKWT...nVMKGWQYRWFVLDY...naGLLSYYSKSD...kmmrGSRRGCVRLRGA..VIGIDDE-.....  
VIRKGLTISN...igiMKGGSKGYWFLTA.....ESLSWYKDEE.....eKEKMYMLPLDNL..KVRDVEKS.....  
VDKAGWIKKSS...ggLLGF WKDRYLLCQ.....AQLLYENED.....dQKCVETVELGSY.eKCQDLRAL.....

PALEGVLSKYT.....nLLQGWNRYFVLDL.....eaGILQYFVNEQ.....skhQKPRGVLSLSGA..IVSLSDE-.....  
GNREGFLWKR.....rDNSQFLRRKFVLLA.....reGLLKYFTKEQ.....gKSPKAVISIKDL..NATFQTEK.....  
PTASGTLRVQQ.....agEMQNWAVHGVKLG.....TNLFCYRQPE.....dadtgEEPLLTIAVNKE.tRVRAGELD.....  
LRRGSKFIKWD.....eETSSRNLTVRVDP.....NGFFLYWTGP.....NMEVDTLDISSI..RDTRTGRY.....arlpkdpkire  
VHIRGWLHKQD....ssGLRLWKRRWFVLSG.....HCLFYKDSR.....eESVLSVLLPSY..NIRPDGPG.....  
SIKEGQLLKQT.....sSFQRWKKRYFKLRG.....RTLYYAKDSK.....SLIFDEVDLSDA..SVAEASTK.....  
LVMEGHFLKRA....snAFKTWSRRWFTIQS.....NQLVYQKKY-.....-KDPVTVVVDDL..RLCTVKLC.....  
TLREGWVVHYS.....nKDTLRKRHYWRLDC.....KCITLQNNNT.....tNRYEKEIPLSEI.ITVESANF.....sl  
YTMEGYLYVQE...krhFGTSSWVKHYCTYQR...dskqITMVPFDQKS....ggkGGEDESILKSC..TRRKTDSI.....  
PIKQGILLKRS...gksLNKEWKKKYVTLCD.....NGLTYHPSL...hdydqNIHGKEIDLRT..TVKVPGR.....lprat  
VEKEGYLQKAKadggkLRKNWSTSWIVLSS.....RRIEFYKESKqalsnmktGHKPESVDLCA..HIEWAKEK.....  
GYREGFLWKR.....rDNGQFLSRKFVLTE.....reGALKYFNRND.....aKEPKAVMKIEHL..NATFQPAK.....  
MVKEGWMVHYT....sRDNLKRHYWRLDS.....KCLTLFQNES.....gSKYYKEIPLSEI.IRISSPRDF.....t  
TRKAGYLNARN..ktgIVSSTWDRQFYFTQG.....GNLMSQARGD.....VAGGLAMDIDNC..SVMVAVDCE.....  
PEKVGWVRKFC...gkglFREIWKRYVVLKLG.....DQLYISEKEV.....kdeKNIQEVFDLSDY.eKCEELRKS.....  
ADHMGFLRTWGpqtptPSGTGRRCWFVLLG.....NLLFSFESRE.....gRAPLSLVVLEGC..TVLAEAP.....  
SLLCGPLRLSE.....SGETWSEVWAAIPM...sdpQVLHLQGGGQ.....dGRLPRTIPLPSC..KLSVPDPE.....  
VMEGYLFLKRA....snAFKTWNRRWFISIQN.....SQLVYQKKLK.....dALTVVVDDLRLC..SVKPCEDI.....  
NRICGFLDIEE...heNSGKFLRRYFILD.....qaNCLLWYMDNpntlgagsSKVLQMLSVKVK..SIATPKQK.....  
AMQEGMQMVKL....rGGSKGLVRFYVLDL.....hrSCIRWRPSR-.....KNEKAKISIDSI.qEVSEGRQS.....evf  
LIGEGVLTCLC.....-RKKPKARQFFLFN.....DILVYGNIVI...qkkkYNKQHIIPLENV..TIDSIKDE.....gDI  
PDRAGSLELRG.....-FKNKLYVAVVG.....DKVQLYKNLE.....eYHLGIGITFIDM..SVGNVKEV.....-  
VPTCGYLNVLV.....-NSRWRERWCRVKD.....NKLIFHKDRT.....dIKTHIVSIPLRGC..EVIPGLDS.....  
AAKEGWLHFRPgkrvggSIRPWKQMYVVLG.....HSLYLYKDKR...eqtPSEEEQPISVNAC..LIDISYSE.....  
WVKTGALQWWC...dwKPHKWVDVRLALEQghdgvrdsILFIYVVH.....eEKYIHIFLNEV..VALVPVLN.....  
ENVYGYLMKYT....nLVTGWQYRFFVLNN.....eaGLLEYFVNEQ.....srnQKPRGTLQLAGA..VISPSDE-.....  
VYKHGALVRKvcrktprGKRGWKSFHGILKLG.....MILYLQKEEYkpgkalseTELKNAISIHHA..LATRASDY.....  
ILKSGTLYRLT....VQNNWKAFTFVLSR.....AYLMAFQPGK.....ldEDPLLSYNVDVC..LAVQMDNL.....  
IVREGYLLKRKepaglaTRFAFKRYVWLSG.....ETLSFSKSPE.....WQMCHSIPVSHI.rAVERVDEG.....  
RLCEGSSFRKI.....GNRRRQERFWYCR...alnhKVLHYGDLDNpqqgevtfESLQEKIPVADI.kAIVTGKDC.....pt  
MKHSGYLWAIG...knVWKRWKKRFFVLVQ..vsqytFAMCSYREKK.....AEPQELLQLDGY..TVDYDTPQ.....  
YEEESFVFEPN.....-CLFKVDE.....FGFFLTWRSE.....GKEGQVLECSLI.nSIRSGAIP.....kdpkilaaleavgk  
VPCCGYLNVLV.....-NQGWERWCRLKC.....NTLYFHKDHM.....dIRTHVNAIALQGC..EVAPGFGP.....  
PIKQGMILLKRS...gkWLKTWKKKYVTLCS.....nGVLTYSSSLG...dymkNIHKKEIDLRTS..TIKVPKGW.....  
LHLEGWMKVPR..nnkrGQQGWDRKYIVLEG.....SKVLIYDNE-.....AREAGQRPVEEF..ELCLPDGD.....vsihga  
RPSQGFLSRRlsqpkldRTSSFRQILPRFRS.adhdraRLMQSFKESHesllspsAAEALELNLED..SIIKPVHS.....  
-MEGVLYKWT....nYLSGWQPRWFLLCG.....GILSYDSPE.....dawKGCKGSIQMAVC..EIQVHSV-.....  
VYKSGFLARKlgkktprGKRGWKTfYAVLKG.....TVLYLQKDEYkpekalseEDLKNVSVVHHA..LASKATDY.....  
CTPSGDLSPLS.....-REPPpspmvkkqRRKLTTPSKTE.gSAGQAE-.....-ENFEF  
LSAFGELVLEGGgggggPRLRGGERLLFLFS.....RMLLVAKRRG.....leYTYKGHIFCCNL..SVSESPR-.....  
TVMTLFYSKKS.....QRPERKTFQVKLET.....RQITWSRGA-.....DKIEGAIDIREI.keIRPGKTS.....rdfdryqedj  
IQKAGYLNLRN..ktgIVTTTWERLYFFFTQG.....GNLMCQPRG-.....AVAGGLIDLNC..SVMVAVDCE.....  
CRICAFLLRKK.....RFGQWAKQLTVIRE.....DQLLCYKSSK.....dRQPHRLALDTC..SIIYVPKD.....  
LLGEGVLTKEC.....-RKKAKPRIFFLFN.....DILVYGSIVL...nkrkYRSQHIIPLLEV..TLELLPET.....IQ/  
VLREGELEKRS....dsLFQLWKKRGLVTS.....DRLSLFPASP.....RARKELRFHSI.IKVDCVERT.....  
IVKQGYVKMKS....rKGIYRRCWLVRFRK.ssskgpQRLEKYPDEK....svclRGCPKVTEISNV.kCVTRLPE.....  
AEMAAELGMRG....pkKGSVLKRRVLKLVV.....NFLFYFRTDE.....AEPVGALLLERC..RVVREE--.....  
VIRKGWLTINN...igiMKGGSKEYWFVLT.....ENLSWYKDDE.....eKEKKYMLSVDNL..KLRDVEKG.....  
LVRGGWLWRQS....sILRRWKRNFALWL.....dGTLGYHDET....aqdEEDRVLHFNVR..DIKIGPEC.....  
LVKDGFLVEVS.....-ESSRKLHVFLFT.....DVLLCAKLLKtsagkhqYDCKWYIPLADL..VFPSPEE-.....  
MKHSGYLYALG...qkVWKRWKKRYFVLVQ..vsqytFAMCSYREKK.....SEPQELMQLEGY..TVDYDTPH.....

RRLKGSIKRTK...sqpKLDNRNHSFRHILPG.....fRSAAAAAADNesrshesILSPSSAVEALDL..SMEEEVVI.....  
FTAEGYLYVQE.krapFGSSWVKHYCMYRK...aakkFNMIPFEHRS.....ggkLGDGEVFFLKEC..TKRHTDSI.....  
NQLSGNLLRKf.....kNSNGWQKLWVFTN.....FCLFFYKSHQ.....dNHPLASLPLLYG..SLTIPSES.....  
VTIQGVLRRKtkegkpvTASWTKYWAALCG.....TQLFYAAKSaterkhfkSTSNKNVSVIGW..MVMMAADDP.....  
TFLCDFLYQAPIssekkLLEETNKKWCVLEG.....GFLSYENDK.....sTTPNGTININEV..ICLAIHKE.....df  
FLKEGILMKLS.....-RKVMQPRMFFLFN.....DALLYTTPVQ.....sgmYKLNMLSLAGM..KVRKPTQE.....  
PTIEGYLYTQE...kwaLGISWVKYCYQYEK.....etKLTMTMPMEQ.....kpGAKQGPLDLTLK.yCVRRKTES.....  
LVKSGELTALeaspgrRKLNTRPVHLHLFN.....DCLLSRPRE.....gsrFLVFDHAPFSSI..RGEKCEMK.....  
MLMCGVLLKIS.....-SGNIQERVFFLFD.....NLLVYCKRKHkastdghrYLFGRINTEVM..EVENVDDG.....te  
PLIEGKLKEKQ..vrwkFIKRWKTRYFTLAG.....NQLLFQKGKS.....kdDPDDCPIELSKV..QSVKAVAK.....  
NFKKGWMSILDpsltttSTSQWKKHWFVLT.....SSLKYRDST...aeaaDELDEIDLRSC.tDVTEYAVQ.....  
SVVCSFLQYME.....KSKPWQKAWCVIPK...qdpLVLYMYGAPQ.....dVRAQATIPLLYG..VVDEMPRS.....  
LVLEGTRFRVHR.....--VRNERTFFLFD.....KTLITKKRG.....dhFVYKGNIPCSSL..MLIESTR-.....-D  
AKICAFLLRKK.....RFGQWTKLLCVIKD.....TKLLCYKSSK.....dQQQMELPLQGC..NITYIPKD.....t  
FLKEGTLMKVT.....-GKNRRRPHLFLMN.....DVLLYYPQK....dgkYRLKNTLAVANM..KVS RPVME.....  
NFKKGWLTQY.....EDGQWKKHWFVLAD.....QSLRYRDSV...aeaaADLDGEIDLSAC.yDVTEYPVQ.....  
VIRRGWLTINN...isIMKGGSKKEYWFLTA.....ESLSWYKDEE.....eKEKYYMLPLDNL..KIRDVEKG.....  
PIKQSFLLRKRS...gnsLNKEWKKKYVTLSS.....NGFLLYHPSI...ndyihSTHGKEMDLLRT..TVKVPGR.....  
RLVEGTCFRKL.....nARRRQDKFWCRLSP.....nhKVLHYGDLEEspqgevphDSLQDKLPVADI.kAVVTGKDC.....  
CIMHGYMLKLG...npFLTQWQRRYFYLP.....NRLEWRGEG-.....ESRQNLLTMEQI.ISVEETQIK.....  
SVICSFLHYME.....kGGKGWHKAWFVPE...nepLVLYIYGAPQ.....dVKAQRSLPLIGF..EVGPPEAG.....  
QEKYGLLNVTkaengkkVRKNWLSSWAVLQG.....SSLLFTKTQGtswfgsnqSKPEFTVDLGA..TIEMASKD.....  
VDPKGYLYWT.....-----YQS.....KEMEFLDITS..irdtrfGKFAKMPKSKL.rDVFNMDF-.....-PD  
IVKQGYVKIRS.....rKLGIFRRRCWLVFVK.asskgrRRELEKFPDEK...aayfRNFHKVTELHNI.kNITRLPRE.....  
VEKSGLLNMTkaqggrkLRKNWGPSWVLTG.....NSLVFYREPPssgwgpagSRPESSVDLRGA..ALAHGRHL.....  
LVRHGELEVELAaappakLKLSSKAVYLHLFN.....DCLLSRRE.....lgkFAVHVHAKMAEL..QVRDLSLK.....  
PEKCGYLELRG.....--YKAKIFTVLSG.....NSWLCKNEQ....dfksGLGITIIPMNVA..NVKQVDRT.....  
TAYEGFLSVPR...psgVRRGWQRVFAALSD.....SRLLLFDAPD..IrlsppsGALLQVLDLRDP..QFSATPVL.....i  
VMQSGTQMIKL....kRGTKGLVRLFYLDE.....hrTRLRWRPSR-.....KSEKAKILIDSI.yKVTEGRQS.....eifhrc  
TEKVGFLYKKS...dgIRRVWQKRKCGVKY.....GCLTISHSTI.....NRPPVKLTLLTC..QVRPNPE-.....  
NRICGFLDIEE...neNSGKFLRRYFILD.....reDSFVWYMDNP..qnlpsgSSRVGAIKLYI..sKVS DATKL.....  
VKHIAWLAEQA..kldgGRQQWRPVLMAVTE.....KDLLYDCMP..wtrdawASPCHSYPLVAT..RLVHSGSG.....  
ELSMGELLMHSfslgkARKDLELTVFVKR.....AVILVYKENChnstdldpFKFRWLIPISAL..QVRLGNPA.....  
ALVEGQVKLRD.....-GKKWKSRLVLRKpspvadCLMLVYKDKS..erikgLRERSSLTLEDI.cGLEPGLPY.....  
PTMEGSLEFKQpggrqpsSSSWDSCRGNLQG.....SSLSFLDER.....maAEKVASIALLDL.TGARCERL.....  
QIKNDIQREKRaterlkkLSEQESLLLLMS.....PSMAFRVHSR.....ngKSYTFLISSDYE..RAEWRENI.....  
VLKAGWLKKQR...sIMKNWQQRWFVLRG.....DQLFYKDKD.....eIKPQGFISLQGT..QVTELPPG.....  
DSFEGWLLKWT...nYKGYQRRWFVLGN.....GLLSYRNQG....emaHTCRGTINLSTA..HIDTEDS-.....  
GKMTDSLRLKPERalsqHAGRFSVNWVILFN.....DALV--HAQ.....FSTHHVFPLATL..WAEPLSEE.....  
LLLQGTLLKIS.....-AGNIQERAFFLFD.....NLLVYCKRKSStksingsIYIFRGRINTEVM..EVENVEDG.....tady  
SAREGWLFKWT...nYIKGYQRRWFVLSN.....GLLSYRSKA....emrHTCRGTINLATA..NITVEDS-.....  
FKVPGFFSKRL....kGSIKRTKSQSKLDR.ntsfrIPSLRSTDDRSesrshesILSPCSTVECLDL.gRGEPVSVK.....  
LLKGSQLLKVK.....SSSWRRERFYKLQE.....DCKTIWQESR...kvmrTPESQLFSIEDI.qEVRMGHRT.....e  
VERCGVLSKWT...nYIHGWQDRWVVLKN.....NALSYYKSED....eteYGCGRGSICLSKA..VITPHDF-.....  
AVCASRVKLQH...lpAQEQW-DRLLVLYP.....TSLAIFSEEL.....dgLCFKGELPLRAV..HINLEEKE.....  
PTMEGPLRRKtkegrkpALSSWTRYWVILSG.....STLLYGAkSgtdrkhykSTPGKKVSIVGW..MVQLPDDP.....  
LLKQGELQQMStsrtrTKKLFHEIYFLFN.....DLLVICRQIP....gdkYQVFD SAPRGLL..RVEELEDQ.....  
PVKEGPLFIHRkgkqplMSSSFKKLYFSLTT.....EALSFAKTPS.....SKKSALIKLANI.rAAEKVEEK.....  
PVTQGDVYRAE.....-----TE..eipkiFQILYANEG-.....-ECRKDVEMEPV.qEAEKTNFQ.....nhkGHI  
IVAQQKLLQDtdqdagLLPRCRERRIFLFE.....QIVIFSEPLDkkgfsmgFLFKNSIKVSCL..CLEENVEN.....  
EALKEAVLRYsdeasmdSGARWQRGRLALRRpgpdgpdRVLELFDPPK.....sSRPKLQAACSSI.qEVRWCTRL.....

TYKHGVLTRKTgkrtpRRRGWKKFYAVLKG.....TILYLQKDEYrpdkalseGDLKNAIRVHHA..LATRASDY.....  
CYCRLFEPDP...nkpQKGLGHQREIFLFLN.....DLLVVTKIFQ.kkksnsvtYSFRQSFSLYGM..QVLLFENQ.....  
SMVEGSELKKV....rSNSRIYHRYFLLDA.....dmQSLRWEPSSK.....DSEKAKIDIKSI.kEVRTGKNT.....difrsr  
TERNGLYKKS....dglRKVWQKRKCSVKN.....GFLTISHGTA.....NRPPAKLNLLTC..QVKTNP-.....  
KGLEGMIRKRScgrdqVCYRWSKRWLWVKD.....SFLLYMCLET.....gaISFVQLFD-PGF..EVQVGKRS.....  
VMKEGWMVHYT....sKDTLRKRHYWRLDS.....KCITLFQNDT.....gSRYYEIPLSEI.ISLEPVKTS.....a  
VQHEGFLLRKRdanrksSNRSWVSLYCVLSK.....GELGFYKDSK.gpasgstHGGEPLLSLHKA..TSEVASDY.....  
IRREGWLYYKQgkkagsGLRQWKRVAALRA.....RSLSLSKERRagaaaagaGEDEAAPVCIGS..CLVDISYS.....  
PELEGALYLKE....dGKKS WKRRYFLLRA.....SGIYVVPKGK...tktsRDLACFIQFENV..NIYYGTQH.....k  
SEKKG YLLKKS....dglRKVWQRRKCSVKN.....GILTISHATS.....NRQPAKLNLLTC..QVKPNAE-.....  
IVMADWLKIRG.....TLKSWTKLWCVLKP.....GVLLIYKTQK.....nGQWVGTVLLNAC..EIIERPSK.....  
LVKRGELTAYVdtvifsRRTSKQQVYFFLFLN.....DVLITKKS SeesynvndYSLRDQLLVESE..DNEELNSS.....pgl  
LLKRGELFLVEetglfrKIASRPTCYLFLFLN.....DVLVVTKKS...eesY MVQDYAQMNIH..QVEKIEPS.....elpl  
DLSMGDLLLHTpaslgkWKKPELAFAVFKT.....AVLVYKDGSSiyedwdpFRFRHMIPTAL..QVRALASA.....  
TAYEGHVRIPK...pagVKKGWQRALAVCD.....FKLFLYDIAE.....gKASQPSVVISQV.iDMRDEEFS.....vssvla  
PVKEGPLFIHRkgkpgIMSSSFKKLYFSLTT.....EALSFAKTPS.....SKKSALIKLANI.rAAEKVEEK.....  
VIMADSLKIRG.....TLKSWTKLWCVLKP.....GVLLIYKTPK.....vGQWVGTVLLHCC..ELIERPSK.....  
ARICAFWRKK.....WLGQWAKQLCVIKD.....NRLLCYKSSK.....dHSPQLDVNLLGS..SVIHKEKQ.....  
VIKQGYLEKKS.kdhsfFGSEWQKRWCVVSR.....GLFYANNEK.....sKQPKGTFLIKGY..GVRMAPHL.....  
PEIEGVLWLKD....dGKKS WKRYFLLRA.....SGIYVVPKGK...akvsRDLVCFLQLDHV..NVYYGQDY.....  
LMQEGMPMRKV....rSKSWKKLRYFRLQN.....DGMTVWHARQ.....arGSAKPSFSISDV.eTIRNGHDS.....  
VQMEGYLGRKHgpnkkaSNRSWNNLYCVLRN.....SELTFYKDAK.nlalmpYHGEEPLALRHA..ICEIAANY.....  
LVCCCQLYEVP.dpnprQRLGLHQREVFLFLN.....DLLVVTKIFQ.kkkilvtYSFRQSFPLVEM..HMQLFQNS.....  
LHCCDEEISFS...lrLYEHIHDLSLFLFLN.....DALLVSSRGTFertskttYQFIASVALHRL..LIENIPDS.....kY  
TYKQGILARKMgkktpwGKRGWKMFHTLLRG.....MVLFLKQGElegeslvqQMVDPEVGVHHS..LATPATHY.....  
IQREGALRFMVaaagsgGSAQWQKCRLLRR.avaeerFRLEFFVPPK.....aSRPKVSIPLSAI.iEVRTTmpl.....  
FLHSGKLYKAK.....--SNKELYGFLFLN.....DFLLLTQITKspksnlqyKMYKTPIFLNEV..LVKLPTDP.....  
IKQIGWLTEQL.....PSGGTAPTALTE.....KELLYLSLP..etrealSRPARTAPLIAT..RLVHSGPS.....kgs  
DMKMKISALKS.....-----EIQKEKAnkgqsraiERLKKMFENEF..LLLLNSP-.....--TIPFRIF  
TAYKGHVKVPK...ptgVKKGWQRAYAVVCD.....CKLFLYDLPE.....gKSTQPGVIASQV.IDLRDDEFS.....vssv  
LKEQQQLLHRD.pftviCGRKKCLRHVFLFE.....HLLFSKLLG.peggsemFVYKQAFKTAADM..GLTENIGD.....  
LMKLGTVERRG.....AMGIWKELFCESLP...leFRLYLSNEE-.....HTCVENCSSLRC.eSVGPAHS-.....  
FLRQGWLLVVP.....PHGEPRPRMFFLFT.....DVLMAKPRPIhlrsgtFACKALYPMACQ..HLSRVFGH.....  
LLKDSFMVELV.....-EGARKLRHVFLFT.....DLLLCTKLLKqsggkqqYDCKWYIPLTDL..SFQMVDEL.....ea  
VGRGGGVAGPP..sgggQPQWQKCRLLLRSegeggsSRLEFFVPPK.....aSRPRLSIPCSSI.tDVRTTAL.....  
LMKLGTVERRG.....AMGIWKELFCESLP...leFRLYLSNEE-.....HTCVENCSSLRC.eSVGPAHS-.....  
LVYNGDLVEYD...adHMAQLQRVHGFLMN.....DCLLVATWLP...qrrgmYRYNALYSLDGL..AVVNVKDN.....  
VVHYAKVQLRF....qHSQDVSDCYLELFP.....AHLFYQAHS.....egLTFQGLLPLTEL..SVCPLEGS.....  
LLREGPVLKIS....fRRNDPMERYLFLFLN.....NMLLYCVPRV..iqvgaqFQVTRIDVAGM..KVRELMDA.....  
KGIEGMIMKRScggqrACYRWSKRWLIVKD.....SFLLYMKPDS.....GAIAFVLLVDKE.fKIKVGGKE.....  
FMQAGCELKKV....rPNSRIYNRFFTLDT.....dLQALRWEPSSK.....kDLEKAKLDISAI.kEIRLGKNT.....etftnng  
SSHRSLVQRVEislghePCDRGEQVTLFLFLN.....DCLEIARKRHgqtrppasLKHIIHMLPLSQI.kKVLDIRT.....  
CIMHGYMSKMG....npFLTQWQRRYFYLFP.....NRLEWRGEG-.....EAPQSLLTMEEI..QSVEETQI.....  
PIRQGHFIVWEgapgarMPWKGHNRHVFLFR.....NHLVICKPRRdsrtdtvsYVFRNMMKLSSI..DLNDQVEG.....  
AQMEGFLNRKHahnkkaSSRSWHNVYCVINN.....QEMGFYKDAK.taasgipYHSEVPVSLKEA..VCEVALDY.....  
LLHSGKLYKTK.....--SNKELHGFLFLN.....DFLLTYMVKssksnaqfKMYKTPIFLNEV..LVKLPTDP.....  
LLLHGPFVSWTykmdIIIFKPSQRQIYLFE.....RGIVFCKIRMgdqglsphYSFKKTMKMLTL..SIRQLGRG.....  
IRHLGWLAEKV...pgeSKKQWKPALVVLTE.....KDLLIYDSMP..rrkeawFSPVHTYPLLAT..RLVHSGPG.....  
VIFMSQVMVQY....gACEEKEERYLMLFS.....NVLIMLSASP...rmsgFIYQGGKIPIAGT..VVTRLDEI.....  
LIKEGQILKLA....aRNTSAQERYLFLFLN.....NMLLYCVPKF..slvgsKFTVRTRVGDGM..KIVETQNE.....  
LLCHGELRSKS.....---GHKLYIFLFLQ.....DILVLRTPVT.rnerhsyQVYRQPIPVQEL..VLEDLQDG.....dvrmmgsfrg

LRCRDEFIVCC.....-GRKKYL RHVFLFE.....DLILFSKTQK.vegshdvYLYKQSFKTAEI..GMTENVGD.....  
RGFEGKLAQGpeaggILSSRGRERRVFLFE.....QIIIFSEALGvrggtqpgYVYKNSIKVSC..GLEGNLQG.....  
LELGTVM TVFS...frkSTPERRTVQVIMET.....RQVAWSKTA-.....DKIEGFLDIMEI.kEIRPGKNS.....kdfra  
LIYTGEMAWIY...qPYGRNQQRVFFLFD.....HQMVLCCKDL...irrdiLYYKGRIDMDKY..EVVDIEDG.....r  
LVCCSRLFEVT.dvnlkIQQA AHQREVFLFN.....DLLVILK LCP.kkksstYTFC KSVGLLGM..QFQLFENE.....  
SIKEGILKIEpskilSGNKFQDRYFVLRD.....GFLFLYKDVK.....sSKHDKMFSLSSM..KFYRGVKK.....  
IVKQGYVRIRS.....rRLGIYQRCWLVFKK.asskqpKRLEKFSDER.....aayFRCYHKVELNNV.kNVARLPKS.....  
FIRLGSLSKLS.....-GKGLQQRMF LFN.....DVL LYTSRGL...tasnqFKVHGQLPLYGM..TIEESEDE.....  
SRLEGWLSLPV..mntKKFGWVKYVIVSS.....KKILFYDSEQ...dkeqSNPYMVL DIDKL.fHVRPVTQT.....  
LIKEGQIQKLS.....aKNGTPQDRHLFLFN.....SMILYCVPKL..rlmgqkFSVREKMDISGL..QVQDIVKP.....  
LKEQGQLVRQD.efvvrTGRHKS VRRIFLFE.....ELLF SKPRH.gptgvdFAYKRSFKMADL..GLTECCGN.....  
GTRKGF LSKKT.....aEASRWHEKWFALYQ.....NVLFYFEGEQ.....sCRPAGMYLLEG C..SCERTPAP.....pra  
FIREGCLHKL T.....-KKGLQQRMF LFS.....DM LLYTSKGV...agtshFRIRG LLLPLQGM..LVEESDNE.....  
LVLEGTFR IQR.....--AKNERTLFLFD.....KLL LITKRD.....dtFTYKAHILCGNL.mLVEVIPK-.....-EP  
LTAQGKLLQQDi eldagMQSRTKERRVFLFE.....QIVIFSELLR.kgsitpgYMFKRSIKMNYL..VLEENVDN.....  
FIRQGS LIQVPvrlgslSLKKEGERQCFLFT.....KHFLICTRSS..ggkhlhLKTGGVLSLIDC..TLIEEPDA.....sddsk  
LETSSYLNVLV.....-NSQWKS RWCSVRD.....NHLHFYQDRN.....rsKVAQQPLSLVGC..EVVPDPS P.....  
IESQGELILQE vwdpktLIRKGRERHLFLFE.....MSLVFSKEVK.dssgrskYLYKSKLFTSEL..GVTEHVEG.....  
VRKAGALAVKNkvesaTRRKWKHYWVSLKG.....CTLFFYESDG.rsgidhnSIPKHAVWVENS..IVQAVPEH.....  
LILQDAFQVWD...pksLIRKGRERHLFLFE.....ISLVFSKEIK.dssgthkYVYKNKLLTSEL..GVTEHVEG.....  
LIYSGELTRVT...qPQAKSQQRMF LFD.....HQLIYCKKDL...lrrdvLYYKGR LDMDGL..EVVDLEDG.....k  
EQMEGMLCRKQafgkkaANRSWQNVYCVLRR.....GSLGFYKDAK...aasagVPYHG EVPVSLA..RAQGSVAF.....  
PEIQGF LQLRG.....sGRKLWKRFFCFLRR.....SGLYYSTKGT...skdpRHLQYVADV NES..NVYVV TQG.....  
VRKAGW LFFKPrklelvARRKWKQYWVTLKG.....CTLLFYETYG.knsmdqsSAPRCALFAEDS..IVQSVPEH.....  
LEFQGE LTEL Gggvlf aSRPRFTPLCLL LFS.....D LLLITQPKS...gqrlqVLDYAH RSLVQA..QQVPDPSG.....  
GTRKGYLSKRS...sDNTKWQTKWFALLQ.....NLLFYFESDS.....sSRPSGLYLLEG C..VCDRAPSP.....kq  
VTYMSQVLIQC...aGSEEKNERYLLLFP.....NVLLMLSASP...rmsgFIYQGKLPTTGM..TITKLEDS.....  
PKIDGELK VRS...iVNHTKQDRYFLFD.....KVIVCKRKG.....ysYELKEIIE LLFH..KMTDDPMN.....nk  
LLEGPVRVKE.....GREGKLDVYFLFS.....DVL LVTKPQR...kadkaK VIRPPLMLDKL..VCQPLRD-.....  
LLEGLSRMKE.....GKDSKMDVYCF LFT.....D LLLVTKAVK...kaertR VIRPPLLVDKI..VCRELRD-.....  
PEIHGFLHAKE...qGKKS WKKIYFFLRR.....SGLYFSTKGT.....sKEPRHLQFFSEF.gNSDIYVSL.....agk  
LIHSGELTKIT...KQGKSQQRTFFLFD.....HQLVSC KDL...lrrdmLYYKGR LDMDDEM..ELVDLGDG.....r  
DTKHGMMKFREllglgIPSGGFHD RYFILNS.....SCLRYKEVRwsgapetsHRPEKEWPIKSL..KVYLG VVK.....  
LIHDGCLLWKT...ATGRFKDVLVLLMT.....DVLVFLQEKD.qkyifptLDKPSV VSLQNL..IVRDIANQ.....  
LHLEGMLCWKT...TSGRLKDILAILL T.....DVL LLLQEKDqkyvfasvDSKPPVISLQKL..IVREVANE.....  
SRIEGWLSV PN..rgniKRYGWKKQYVVVSS.....KKILFYNDEQ...dkeqSNPSMVL DIDKL.fHVRPVTQG.....  
PEIQGF LHVKE...IGKKS WKKLYVCLRR.....SGLYCSTKGT...skpRHLQLLADLEDS..NIFSLIAG.....rf  
LIKEGHILKLS...aKNGTTQDRYLILFN.....DRLLYCVPR L..rlgqkFSVRARIDVDGM..ELKESNL.....  
GHKKGATKMKD...IARFKPMQRHLFLYE.....KAIVFCKRRVegsdrypsYSFKHCWK MDEV..GITEYVKG.....  
PKIDGELKITS...VERRSKMDRYAFLLD.....KALLICKRRG.....dsYDLKDFVNLHSF..QVRDDSSG.....c  
LLMQGSFSVWTtkvkelARFKPMQRHLFLHE.....KAVLFCKKREegyekapsYSYKQSLNMAAV..GITENVKG.....  
PQGDGEIRITT...IDKHTKQERHIFLFD.....LAVIVCKRKG.....dnYEMKEIIDLQQY..KIANNPTT.....dke  
LVRDGSVFLKN...AAGRLKEVQAVLLT.....DILVFLQEKDqkyifasILDQKSTVISLKKL..IVREVAHE.....  
FIMEGPLTRIG...--AKHERHIFLFD.....GLMISCKPNHlpgytsaeYRLKEK FVMRKI..QICDKEDT.....c  
FIMEGTLTRVG...--AKHERHIFLFD.....GLMICCKSNHlpgasnaeYRLKEKFFMRKV..QINDKDDT.....

---

PDREGWLLKLG...gRVKTKRRWFILTD.....NCLYFFEYTT.....dKEPRGIVPLENL..SIREVEDP.....  
PDREGWLLKLG...ggRVKTKRRWFILTD.....NCLYFFEYTT.....dKEPRGIIPLENL..SIREVEDS.....  
PDREGWLLKLG...ggRVKTKRRWFILTD.....NCLYFFEYTT.....dKEPRGIIPLENL..SIREVDDP.....  
PDREGWLLKLG...gRVKTKRRWFILTD.....NCLYFFEFTT.....dKEPRGIIPLENL..SVQKVEDP.....  
IVKEGWLHKRG...eYIKTWRPRYFLLKN.....dGTFIGYKERP..qdv dqrESPLNNFSVAQC..QLMKTERP.....  
IVKEGWVQKRG...eYIKNWRPRYFLLKT.....dGSFIGYKEKP...qdvdlIPYPLNNFSVAKC..QLMKTERP.....

VIKEGWLHHRG....eYIKTWRPRYFLLKS.....dGSFIGYKERP..eapdqLPLNNSVAEC..QLMKTERP.....  
KTCRGYLIKMG....gKIKTWKKRWFVDR.....nkRTFSYADKH.....eAKLKGVIYFQAI.eEVYDHLK.....  
GCCRGPLVKMG....gRIKTWRKRWFCFDR.....qaRRLAYADKE.....eTKLKGVIYFQAI.eEVYDHLR.....  
KVCRGYLIKMG....gKIKSWKKRWFVDR.....lkRTLSYYVDKH.....eTKLKGVIYFQAI.eEVYDHLR.....  
LLKEGFMIKRAqgrkrfGMKNFKKRWFRLTN.....HEFTYQKSKG.....DQPLCNIPNIENI.IAVERLEEE.....  
TILEEILIKRSqqkkktSPLNYKERLFLTK.....SVLSYYEGRA.....ekKYRKGVIDISKI..KCVEIVKN.....ddgv  
HLKEGEMYKRAqgrtriGKKNFKKRWFCLTS.....RELTYHRQQG.....KDAIYTIPVKNI.IAVEKLEEG.....  
VVCSGWLRKSP.pekkIKRYAWKRRWFVLRSGritgdpDVLEYYKNDH.....aKKPIRIIDLNL.CQVVDAGLTF.....  
VILESIFLKRsqkkktSPLNFKKRLFLLTV.....HKLSYYEYDF..ergrrGSKKGSIDVEKI..TCVETVIPeknprrqprge  
TVCMGWLIKSP.perklQRYAWKRWVLRGRmsgndpDVLEYYRNKH.....sNKPIRVIDLSEC..TVWKHAGP.....  
VVCTGWLRKSP.pekkIRRYAWKKRWFILRSgrmsgdpDVLEYYKNEH.....sKKPLRIINLNL.CQVVDAGLTF.....  
ILLEEQLIKKsqkrrtSPSNFKVRFVLT.....ASLAYFEDRH.....gkRTLKGSIELSRI..KCVEIVKS.....disi  
VIKAGYCVKQG....aVMKNWKRRYFQLDE.....NTIGYFKSEL.....eKEPLRVIPLKEV.hKVQECKQS.....  
VAKAGYLHKKG..gtqLQLLKWPLRFVH.....RCIYYFKSST.....sASPQGAFLSGY.nRVMRAAEE.....  
DRHEGFMLKKR...kwPLKGWHKRFFVLDN.....GMLKYSKAPL...diqkGKVHGSIDV-GL..SVMSIKK-.....  
PVQKGFLKKR...kwPLKGWHKRFFCLEK.....GILKYAKSQ-.....-ADIEREKLHGC.iDVGLSVMS.....  
VLKEGFLVKRG....hIVHNWKARWFILRQ.....NTLLYYKLEG...grrvTPPKGRIVLDGC..TITCPCLE.....  
GTKEGYLTKQG....gLVKTWKTRWFTLQR.....NELKYFKDQ-.....-MSPEPIRIDL.tECSAVQFD.....  
LIKSGYCVKQG....nVRKSWKRRFFALDD.....FTICYFKCEQ.....dREPLRTIPLKDVikTHECLVKS.....  
VVKQGYLSKQG....hKRKNWKVRRFVLRK...dpAFLHYDPSK.....eeNRPVGGFSLRGS..LVSALEDN.....  
ERQEGHLLKKR...kwPLKGWHKRYFVLED.....GILHYATTRQ...ditkGKVHGSIDVRLS..VMSINKK-  
SILEELLKKSqqkkkmSPNNYKERLFLTK.....TSLSYEYDK.....mkrGSRKGSIEIKKI..RCVEKVN.....  
ILKMGVVDKRK.....-GLFARRRQLLLE.....gPHLYYVDPVN.....KVLKGEIPWSQE.IRPEAKNF-.....  
IVKKGYLLKKG.....KGKRWNLYFILEG....sdAQLIYFESEK.....raTKPKGLIDL SVC..SVYVHDS.....  
ALKQGWLHKKGggsstlSRRNWKKRWFVLRQ.....SKLMYFENDS.....eEKLKGTVEVRTA.kEIIDNTS-.....  
VLKQGYLWKRK....hLRRNWAERWFQLQP.....SSLCYFGSEE.....cKEKRGTIPLDAH.cCDEVLPDR.....  
RIREGYLVKKG....svFNTWKPMWVLE.....DGIEFYKKS.....dNSPKGMIPLKGS..TLTSPCQD.....  
GDCEGWLWKKK.daksyFSQKWKKYWFVLDK.....ASLYWYINEE.....dEKAEGFISLPEF..KIDRASEC.....  
VHKRDYFIKSPppqiffSGTSWKKRFLSILSQ..srgtgLLSYKDH-.....-QHRGSIEIDGS.sTVEVGINC.....c  
VTKAGWLYKQA....ssGVKQWNRWFVLDV.....RCLFYKDEK.....qESILGSIPLLSF..RVAAVQPS.....  
LEKSGYLLKMS....vRVKTWKRRWFVLDK.....GELLYYKSPS.....dviRKPPQGHIELSAS.cSILRGDN-.....  
RSYEGILYKKG....aFMKPWKARWFVLDK...tkHQLRYDHRM.....dTECKGVIDLAEV..EAVAPGTP.....  
RSFEGTLYKRG....aLLKGWKPRWFVLDV...tkHQLRYDSDGE.....dTSCKGHIDLAEV..EMVIPAGP.....  
STMSGYLYRSK....gSKKPWKHLWFVIKN.....KVLTYAASE.....dVAALESQPLLGF..TVTLVKDE.....  
PYFHSFLYMKG....gLMNSWKRRWCVLKD.....ETFLWFRSKQ.....EALKQGWLHKKG.gGSSTLSRR.....  
IQLSGMYNVRK.gkmqIPVNRWTRRQVILCG.....TCLIVSSVKD.....svSGKMHVPLIGG..KVEEVKK-.....  
IIKQGCLLQK....hRRKNWVKRKFILRE....dpAYLHYDPAG.....gEDPLGAVHLRGC..VVTSSVESS.....  
VRKCGYLRKQK.....-HGHRFFVLRGggsppqpPRLEYEYSEK..kwrkaGAPKRVIALDCC.ININKRADA.....  
-----MRA.....-----LIYSTTT-----AGS.QMEHSGM-----R.....  
NTKCGWLRKQG....gFVKTWHTRWVFLKG.....DQLYFKDED.....eTKPLGTIFLHGN.kVIEHPCNE.....  
VCKRGYLRKQK.....-HGHRRYFVLKL.etadapARLEYRNARsgaavpallPPRRVILYQC.fSVSQRADA.....  
VIKQGWLHKANstivTMKVFRRYFYLTQ..lpdgsYILNSYKDEK.....nsKESKGCYLDAC.iDVVQCPKM.....  
VDNAGFLYKRG....gRGTGSHRRWFVLRG.....NILFYFEAEG.....sREPLGVILLEGC..TVELVDAR.....  
KKLCGYLSKFG....gkgPIKGWKCRWFFYDE....rkCHLYYSRTAQ.....dANPLDSIDLSSA..VFDCKADA.....  
VEEKGLTIFE...dvsGFGAWHRRWCVLG.....NCISYWTYPD...derrKNPIGRINLANC.iSHQIEPAN.....  
MGIGDFSATVG.....-----TLTA.....GKICAVHTG-.....-MRALIYSTTTA.gSQMEHSG-.....  
LEKSGYLLKMG....sRVKTWKRRWFVLRQ.....GQILYYKSPS.....dviRKPPQGVLDLNSH.cQIVREEE-.....  
SRLCGYLQKLS....gkgPLRGYRSRWFVDS....rrCYLYYFKSPQ.....dALPLGHLDIADA..CFSYQGRD.....  
KRYEGPLWKSS.....RFFGWKLFVVLEH.....GVLSWYRKQP...davhnSYRQGCKHLTQA..VCTVKPT-.....  
MATEGNAEKAD.....-----GfVNLSDf..TVERASEC.....KKNNAFKINHPQI.....  
VVRGWLYKQD...stGMKLWKKRWFVLSL.....LCLFYRDEK.....eEGILGSILLPSF..QIAMLTAE.....

PTCRGYLHKRT...hsgFVKGWRKRWFVLKH.....dGFLLYYKHRK...degkWPPLDMIKLEGA..EVDIDNSL.....  
EACAKPLWHVF.....-KPPPALECRRC..HVKCHRDH.....ldkkeDLISPCKVS'  
PTVKGWLTkVK.....-HGHSKLVWCALVG.....KTFYYSRSHE.....dKRPLGCLPVQDA..HIEEVDRS.....cndsdec  
VQLYGVWLRKP...fgrSSAKWSRRFFIIE.....SFLLYSESEfetnkyfniHPKGVIPPLGGC..LVEAREEP.....  
KEKCGWLDKLS...pqGKRMFQKRWVFDG.....LSISYYNDR.....eMYSKGIPLTAI..STVRAQG-.....  
FVKSGWLLRQS....tILKRWKNWFDLWS.....dGHLYYDDQT....rqsIEDKVHMPVDCI..NIRTGHEC.....rc  
VRLCGHLRQK.....-SQRFFVLR.....dpPRLECYESEKflasgcrpPRPRRTVSLEGA.cTISKRAA.....  
LDKAGVLHRTKdkgkriRKKHWSTSWTVLEG.....GVLTFKDSKglrqsiskISTPEYTVELKGA..SLSWAPKD.....  
VLKQGYMMKKG.....hKRKNWTERWVFLKP.....NIISYYVSED.....IKDKKGDILLDEN.cCVESLPDK.....  
LKKGTkLVKWD.....-DDSTIVTPTILRT....dpqGFFFYWTDQN.....keTELLDLVLKDA..RCGKHAEA.....pkdpklr  
ILLSGIYNVRK...gkQLHKWAERLVVLCG.....TCLIVSSVKD.....cqTGKMHILPLVGG..KIEEVKR-.....  
VFKSGWLYKGNtnvntvTVRSFKKRYFQLTQ..lpdnsYIMNFYKDEK.....isKEPKGCIFLDSC.tGVVQNNRL.....  
VFKSGWLYKGNtnvntvTVRSFKKRYFQLTQ..lpdnsYIMNFYKDEK.....isKEPKGCIFLDSC.tGVVQNNRL.....  
SLVCSFLQLIG...dkCSRSLPRSWCVIPR....ddpLVLYVYAAPQ.....dTKAHTSIPLLYG..QVISGPQG.....  
PEKVGWVRKFC..gkGIIFREIWKWRYVVLK.....DQLYVSEKEV....kdeKNSQEVFDLSDY.eKCEELRKS.....  
VRKVGYLKPK.....-SMHKRFFVLR.....AaseagpARLEYEENEK..kwrhksSAPKRSIPLESC.fNINKRADS.....  
PSISSSTSPKLpppsphANRKKHRR-----.....KKSTSNFKADGL..SGTAAEQE.....-ENLE  
ADKAGWIKKSS...ggLLGLWKDRYLLLCQ.....AQLLYENED.....eQKCVETVELGSY.eKCQDLRTL.....  
LRRGSKFIKWD....eEASSRNLVTLRVDP.....NGFFLYWTGP.....NMEVDTLDISSI..RDTRTGRY....arlpkdpkire'  
PDCDGWLLLRK.vpggfMGPRWRRWFVLK.....HTLYWYRQPQ.....dEKAEGLINLSNY..SLESGHDQ.....  
PDCDGWLLLRK.vpggfMGPRWRRWFVLK.....HTLYWYRQPQ.....dEKAEGLINLSNY..SLESGHDQ.....  
PLRTGTLELRG.....-HKAKVFAALIP.....GELALYKSEQ...afslGIGICFIELQGC..SVRETKS-.....-I  
FIVRGWLHKEVknspkmSSLKLLKRWFVLTH.....NSLDYYKSSE.....knALKLGTLLVNSL.cSVVPPDEK.....  
NQLSGYLLRKF....kNSNGWQKLWVFTN.....FCLFFYKTHQ.....dDYPLASPLLLGY..SVSLPREA.....  
PLLSGWLDKLS...pqGNVYFQRRFVQFNG.....RSLMYFGSDK.....dPFPKGVIPPLTAI..EMTRSSK-.....  
YLKQGFMEKTG...pkHREPFKKRWFALDP....qeRRLLYYKNPL.....daFELGQVFLGSNE.gGYEVWEDL.....  
IIVKGWLYREPrgggarPWLLPRRAWFVLR.....DSLQDFSSSG....kgARRLGSVLVLSL.cSVTGPERR.....  
VLKEGVLEKRS...ggLLQLWKRKRCVLTE.....RGLQLFEAKG...tggrPKELSFARIKAV..ECVESTG-.....  
IVREGFLKRKepgglTRFAFKKRYFRLSG.....RDLSYSKTPE.....WQVHTSIPLSCI..RAVEHVDE.....  
HNVRKLLKRLK.....EKKRAKSELGAYTP...rdgpPSALGSRES-.....LATLSELDLGAE.rDVRVWPLH.....  
VHMGWVNERL..qgadNSQNFRPKFLALRG.....SSFYIFGAPP..vstldwGRAERAYNLCEV..LFKVHKFW....Isdny  
VSHSGFLYKTAIldqrrAREEFsRRWCVLGD.....GVLSYFENER.....aVTPNREIRASEI..VCLAVPPP.....  
ILKEGMLTKQN....nSFQRSKRRYFKLRG.....RTLYYAKTAK.....SIIFDEVDLTD..SVAESSTK.....  
LVMEGHFLKRA...snAFKTWSRRWFTIQN.....NQLVYQKKY-.....-KDPVTVVDDL..RLCTVKLC.....  
SAISGYLSRCK....sGKRRWKKLWLVK.....KVLYTYLASE.....dKVAMESIPLLGf..TIAPEKEE.....g  
IVYMGWCEARE...qesIQDRVYTPVFLALRG.....SCLYRFLSPP..vttdwTRAETFSVCEI..MCKVLKDS.....  
AVKQGFHLQ...qqtFGKKWRRFAAVLYG.esgcalARLELQDVPE...ktrrgEATRKVRLSDC.IRVAEVGSE.....  
WTMEGYLYVQE...krlGFTWTKHYCTYDK.....GSKMFTMSIPfffqnglvTGSPPEMFKLKSC..IRRKTDISI.....  
ADHTGFLRSWGpgspptPSGTGRRYWVFLK.....NLLFSFETRE.....sRVPLSLVVLEGc..TVELAEAP.....  
PIKVGWLLKQR....sIVKNWQQRVFLRA.....QQLYKDEE.....dSKPQGCMYLPGS..TVKEIATN.....  
GYREGLLWKR.....rDNGQFLSRKFVLTE....reGALKYFNKND.....aKEPKAVMKIEHL..NATFQPAK.....  
ILKSGTLYRLT.....VQNNWKAFTVLSK.....AYLMAFHPGK....IdEDPLLSYNVDVC..LAVQIDNL.....  
ITKHGWLYKGNsaisvTMRSFKRRFFHLIQ..lgdgsYNLNFYKDEK.....isKEPKGSIFLDSC.mGVIQNNRV.....  
ITKHGWLYKGNsaisvTMRSFKRRFFHLIQ..lgdgsYNLNFYKDEK.....isKEPKGSIFLDSC.mGVIQNNRV.....  
IVMEGYLFKRA...snAFKTWNRRWFSIQN.....NQLVYQKKFK.....dSPTVVVDDLRLC..TVKHCEDI.....  
SIKEGQLLKQT....sSFQRWKKRYFKLRG.....RTLYYAKDSK.....SLIFDEVDLSDA..SVAEASTK.....  
AMLGRSRLKI....rSRTWHKERLYRLQE.....DGLSVWFQRR....iprAASKHIFVQHI.eAVREGHQs.....eg  
GNREGFLWKR.....rDNAQFLRRRFVLLS....reGLLKYTYKEE.....gKAPKAVISIKDL..NATFQTEK.....  
WVKTGALQWWC....dwKPHKWVDVRALEQghdgardSILFIYVH.....eEKKYLHVFLNEV..TVLVPVLN.....  
TSIASPVILRV.....-DPKGYLYWTYQN.....QEMFLDVTS..irdtrfGKFAKIPKSQKL.rEVFNMDf-.....  
VIKAGYLEKRR.kdhsfLGFQWQKRWALSK.....TVFYGGSDK.....dKQKGEFAIDGY..DVRMNNTL.....

PIKQGILLKRS...gksLNKEWKKKYVTLCD.....NGLLTYHPSL...hdymqNIHGKEIDLLRT..TVKVPGKR.....lprat  
VHIRGWLHKQD...ssGLRLWKRRWFVLSG.....HCLFYKDSR.....eESVLSVLLPSY..SVRPDGP  
ILKEGPLLKNC...nSFRRWKLRYCLVQG.....QKLHFAHPS.....FAHFETIDLSQV..VLAESSR.....  
VVKEGWMVHYT...sRDNLKRHYWRLDS.....KCLTLFQNES.....gSKYYKEIPLSEI.IRVSSPQDF.....  
VIRKGWLTVSN...igiMKGGSGKYWFVLT.....ESLSWYKDDE.....eKEKYYMLPLDNL..KVRDVEKG.....  
--MEGVLYKWT.....nYLTGWQPRWFVLDN.....GILSYYSQD.....dvcKGSKGSIKMAVC..EIKVHPA-.....  
YTMEGYLYVQE...krhFGTSSWVKHYCTYQR...dskqITMVPFDQKS.....ggkGGEDESRTLKSC..TRRKTDSI.....  
LVRGGWLWRQS...sILRRWKRWFALWL.....dGTLGYHDET.....aqdEEDRVVIHFVNR..DIKVGQEC.....  
AIIQNVEKQDG...gwwRGDYGGKKQLWFPS.....NYVEEMINPALdensplgDLLRGVLDVPAC..QIAIRPEG.....  
TRKAGYLNARN..ktglVSSTWDRQFYFTQG.....GNLMSQARGD.....VAGGLAMDIDNC..SVMVDCE.....  
RLCEGSSFRKI..gnrrRQERFWHCRLALNH.....KVLHYGDLDDnpqgevtfESLQEKIPVADI..kAIVTGKDC.....ph  
PTIEGYLYTQE...kwaLGISWAKYYCRYEK...etrmLTMIPMEQKP.....GAKQGPVDLTLK.yCVRRTES.....  
LVRSDDIETV.yndrgEIVKTKQRIFMLN.....DVLMCATASS.....rNSHESHAVMSQR.yLLKWSVPL.....  
YLKEGYMEKTG...pkQTEGFRKRWFMTDD.....RRLMYFKDPL....dafARGEVFIGSKES..GYTVLEGL.....  
VEKEGYLQKAKadggkLRKNWSTSWIVLSG.....RKIEFYKDSKqalpmktRHNVESVDLGA..HIEWAKEK.....  
PLCDSGLHLNYsswptsPGLRWEKRWC---.....-DLRLIPLHA..RFSQYVPG.....tdISRQI  
ITKEGMLHYKA.stsyIGKEHWKACFVLSN.....GILYQYDRT.....dVIPLLSVNMGGE..QCGCRRS.....  
PALEGVLSKYT...nLLQGWNRYFVLD.....eaGLLQYFVNEQ....skhQKPRGVLSLSGA..IVSLSDE-.....  
PIYGGWLLLAPfdnpvhRSRKWQRRFFILYE.....HGLLRYALDE.....mptTLPQGTINMNQC.tDVVDGEAR.....  
PIYGGWLLLAPfdnpvhRSRKWQRRFFILYE.....HGLLRYALDE.....mpnTLPQGTINMNQC.tDVVDGEAR.....  
PDRAGSLELRG.....-FKNKLYVAVTG.....DKVQLYKNLE.....eFHLGIGITFIDM..NVGNVKEV.....-  
LIGEGVLTCLC.....-RKKPKARQFFLN.....DILVYGNIVI...qkkkYNKQHIIPLNV..TIDSIKDE.....gEl  
VMEGYLFRKRA...snAFKTWNRRWFISIQN.....SQLVYQKCLK.....dALTVVVDDLRLC..SVKPCEDI.....  
VYKSGFLARKlgkktprGKRGWKTFFYAVLKG.....TVLYLQKDEYkpeklsdEDLKNVSVHHA..LASKATDY.....  
DAFAGFLNEQQ...tgkGLVGWRRLYCALRG.....GKLRCFYGPE..eieakVEPALVVPIDKE.tRIQAVEKD.....  
DAFAGFLNEQQ...tgkGLVGWRRLYCALRG.....GKLRCFYGPE..eieakVEPALVVPIDKE.tRIQAVEKD.....  
VSHSGFLYKTApqdrrAREEFSRRWCVLSD.....GVLSYENER.....aVTPNGEIRASEI..VCLAVSPL.....  
SLLCGTLNLS.....DGTTWNEVWAAIPE...sdpQVLDLLAGSQ.....aGRLLYSIPLSGC..NITMPDPE.....  
MQSGTQMIKLLK.....RGTKGLVRLFYLDE....hrTRLRWRPSR-.....KSEKAKILIDSI.yKVTEGRQS.....eifhrq  
LSAFGELVLEGggggggPRLRGGERLLFLFS.....RMLLVAKRRG.....peYTYKGHIFCCNL..SVSETPR-.....  
ESVNGYLMKYT...nLVTGWQYRFFVLNN.....eaGLLEYFVNEQ....srmQKPRGTLQLAGA..VISPSDE-.....  
VYKHGALVRKVcrktpGKRGWKSFHGILKG.....MILYLQKEEYqpgkalseAELKNAISIHHA..LATRASDY.....  
PEKCGYLELRG.....-YKAKIFTVLRG.....NSVWLCNEQ....dfksGLGITIIPMVA..NVKQVDRA.....  
AMQEGTQMVKL...rGSSKGLVRFYLD.....hrSCLRWRPSR-.....KNEKAKISIDSI.qEVSEGRQS.....eifq  
VPCCGYLNLV.....-NQGWERWCRLRC.....NTLYFHKDRT.....diHTHVNSIALRGC..EVAPGFGP.....  
MKHSGYLWTIG...knVWKRWKKRFFVLVQ...vsqytFAMCSYREKK.....AEPQELLQLDGY..TVDYDTPQ.....  
AAREGWLQFRPgkrvggSIRPWKQMYVVLRG.....HSLYLYKDRR..eqttpSEEEQPISVNAC..LIDISYSE.....  
PIKQGMLLKRS...gksLNKEWKKKYVTLCD.....nGVLTYHPSLH...dymqNVHGKEIDLLRT..TVKVPGKR.....  
LHLEGWMKVPR..nnkrGQQGWDRKYIVLEG.....SKVLIYDNE-.....AREAGQRPVEEF..ELCLPDGD.....vsihga  
RPSQGFLSRRLsqpkldRTSSFRQILPRFRS.adhdraRLMQSFKESHesllspssAAEALELNLEDED..SIKPVHS.....  
MKHSGYLYALG...qkVWKRWKKRYFVLVQ...vsqytFAMCSYREKK.....SEPQELMQLEGY..TVDYDTPH.....  
VYKSGFLARKlgkktprGKRGWKTFFYAVLKG.....TVLYLQKDEYkpekalseEDLKNVSVHHA..LASKATDY.....  
VPTCGYLNVL.....-NSRWREWRVVD.....SKLILHKDRA.....dIKTHLVSIPLRGC..EVIPGLDS.....  
TVMTLFYSKKS.....QRPERKTFQVKLET.....RQITWSRGA-.....DKIEGSIDIREI.keIRPGKTS.....rdfdryqedj  
SALKSEIQKEK..ankgQSRAIERLKKMF.....NEFLLLNS-.....-PTIPFRIHNR  
NFKKGWMSILD.....EPGEWKKHWFVLT.....SSLKYRDST...aeeaDELDEIDLRSC.tDVTEYAVQ.....  
PTASGALRVQQ...agELQNGTLVHGVLKG.....TNLFCYWRSE...dadtgQEPLFTIVINKE.tGVRAGELE.....  
-----.....-GEWKKHWFVLT.....SSLKYRDST...aeeaDELDEIDLRSC.tDVTEYAVQ.....-RN  
LIIPGEQYFYL...kaRSVAERQRWLVALG.....SAKACLTD-.....RTQKEKEFAENT.eNLKTKMSE.....  
IVKQGYVKMKS...rKGIYRRCWLFRK.ssskgpQRLEKYPDEK...svclRGCPCVTEISNV.kCVTRLPKE.....  
IQKTGYLNLNRN..ktglVTTTWERLYFFFTQG.....GNLMCQPRG-.....AVAGGLIDLNC..SVMVDCE.....



IQKTGYLNLRN..ktglVTTTTWERLYFFFTQG.....GNLMCQPRG-.....AVAGGLIDL DNC..SVM AVDCE.....  
ELSMGELLMHSfslsgkARKDIELTVFVFKR.....AVILVYKENChnsadldpFKFRWLIPISAL..QVRLGNTA.....  
LVKSGELTALEvspglrRKLTTTRPVHLHLFN.....DCLLSRPRE.....gsrFLVFDHAPFSSI..RGEKCEMK.....  
VIRKGWLTINN...igiMKGG SKEYWFVLT A.....ENLSWYKDDE.....eKEKKYMLSVDNL..KLRDVEKG.....  
NRICGFLDIED....neNSGKFLRRYFILD T.....qaNCLLWYMDNP..qnlavgAGAVGSLQLTYI..sKVSIATPK.....  
LVKDGFLVEMS.....-ESSRKL RHVFLFT.....DVLLCAK LK Ktsagkhq qYDCKWYIPLADL..VFPSPEE-.....  
AKICAFLLRKK.....RFGQWTKLLCVIKD.....TKLLCYKSSK.....dQQPQMELPLQGC..SITYIPRD.....  
SFLCDFLYQTAvssekkLLED TNKKWCVLEG.....GFLSY YENDR.....cTTPNGTINISEV..ICLAVHKE.....  
ILCEGELEKRS....dsLFQVWKKKRCVLT A.....DRLR LFSGKT.....spAKELFFHSILKV..DCVEHTS-.....  
LLCQGPVKLKC.....FQKT KKKRHLSLFN.....DVLVVSRI LN.....kreFKIKCI IPLHLL..wVVVDDVAQ.....rrkr  
VTIQGV LRRKTkegk pTVASWTKYWAALCG.....TQLFY YAAKSaterkhfkSTSNKNVSVVGW..MVMMA DDP.....  
QIKSDIQREKRvmerlrKKLSEQESLLLLMS.....PSMAFRVHSR.....ngKSYTFLISSDYE..RAEWRESI.....  
TFLCDFLYQAPIssekkLLEETNKKWCVLEG.....GFLSY YENDK.....sTTPNGTININEV..ICLAIHKE.....df  
FKVPGFFSKRL.....kGSIKRTKSQSKLDR....ntsFRLPSLRNADesrshgsILSPCSAVECLDL.gRGEPVSVK.....  
-----MKNWQQRWFVLRG.....DQLFY YKDKD.....eSKPQGFISLQGT..QVTELLPD.....pedPC  
CRICAFLLRKK.....RFGQWAKQLTVIKE.....EQLLCYKSSK.....dRQPHLR LALDVC..TVIYVPKD.....  
SPMVKKQRRKK.....-----LST.....PSKTEGSAVQ.....aEAKRKMWKLKSF.gSLRNIYKA.....EEI  
PLIEGKLKEKQ..vrwkFIKRWKTRYFTLAG.....NQLLFQKGKS.....kdDPDDPPIELSKV..QSVKAVAK.....  
LLGEGVLTKEC.....-RKKAKPRIFL FN.....DILVYGSIVL...skrkYRSQHIIPLEEV..TLEPLPET.....IQ/  
NFKKGWLT KQY.....EDGQWKKHWFVLAD.....QSLRY YRDSV.....aeaaADLDGEINLSTC.yDVTEYPVQ.....  
VIRRGWLTINN...isiMKGG SKEYWFVLT A.....ESLSWYKDEE.....eKEKKYMLPLDNL..KIRDVEKG.....  
FLKEGTLMRVR.....-GKSRHPRHLFLMN.....DTLLYTHPQK....dgkYRLKSSLPVANM..KVS RPVMD.....  
VTIQGV LRRKTkegk pTVASRTKYWAALCG.....TQLFY YAAKSaterkhfkSTSNKNVSVVGW..MVMMA DDP.....  
PIKQS FLLKRS...gnsLNKEWKKKYVTLS S.....NGFLLYHPSI...ndyihSTHGKEMDLLRT..TVKVPGR.....  
RLVEGTCFRKL.....nARRRQDKFWCRLSP....nhKVLHYGDLEEspqge vphDSLQDKLPVADI.kAVVTGKDC.....  
AEMAAELGMRG...pkKGSVAKRRLV KLVV.....NFLFYFRPDE.....AEPLGALLERC..RVAQEE-.....  
NQLSGNLLRKF....kNSNGWQKLWVFTN.....FCLFFYKSHQ.....dSHPLASLPLLYG..SLTIPSES.....  
SITPSITL SIT.....-----PS.....ITLSIATNSA....angCALQAALSLSDL..QARYPFHN.....nrLRKYAFI  
SVICSFLHYME....kGGKGWHKAWFVPE...nepLVLYIYGAPQ.....dVKAQRSLPLIGF..EVGPPEAG.....  
QEKYGLLNVTKtengkkVRKNWLSSWAVLQG.....SSLLFTKTQGtswfgsnqSKPEFTVDLKG A..VIEMASKD.....  
IVKQGYVKIRS.....rKLGIFRRCWL VFKK.asskgrRREKFPDEK....aayfRNFHKVTELHNI.kNITRLPRE.....  
VKHIAWLA EQA...kldgGRQQWRPVLM AVTE.....KD LLYDCMP..wtrdawASPCHSYPLVAT..RLVHSGSG.....  
FTAEGYLYVQE.krpapFGSSWVKHYCMYRK...takkFN MIPFEHRS....ggkLGDGEAFFLKEC..TKRHMDST.....  
SIKEGILKLEepskilSGNKFQDRCVLRD.....GHLFIYKDPK.....sSKHDKMFPLRAM..KFYLG VKK.....  
SEVCSFLQYME.....KSKPWQKIWCVIPK...qdpLVLYMYGAPQ.....dVRAQATIPLLGY..VDDMPKS.....  
AICASRVKLQH...lpSQEQW-DRLLVLYP.....ASLAIFSEEP.....egLSFKGELPLSAI..HINLEEKE.....|  
VIKQGYLEKKS.kdhsfFGSEWQKRWCVISR.....GLFLY YANEK.....sKQPKGTFLIKGY..SVRMAPHL.....  
TAYEGFLSVPR...psgVRRGWQRVYAALSD.....SRLLLFDAPD.....prGSLASGVLLQAL..DLRDPQFS.....atpv  
PLIEGKLKEKQ..vrwkFIKRWKTHYFTLAG.....NQLLFQKGKS.....kdDPDDSPIELSKV..QSVKAVAK.....  
FLKEGTLMKLS.....-RKVMQPRMFFL FN.....DALLYTTPMQ....sgmYKLNMLSLAGM..KVRKPTQE.....  
YEEESFVFEPN.....-----CLFKVDE.....FGFFLTWKSE.....GKEGQVLECSLI.nSIRQAAIP.....kdpkilaaleavgks  
CIMHGYMLKLG...npFLTQWQRRYFY LFP.....NRLEWRGEG-.....ESRQSLLTMEQI..MSVEETQI.....  
VERCGVLSKWT....nYIHGWQDRWVVLKN.....NTLSY YKSED....eteYGCRGSICLSKA..VITPHDF-.....  
TEKVGFLYKKS....dgIRR VQKRKCGVKY.....GCLTISHSMI.....NRPPVKLPLLTC..QVRPNPE-.....  
GKMTDSL RKP EralslqHAGRFSVNW FILFN.....DALV---HAQ.....FSTHHVFPLATL..WAEPLSEE.....  
TLREGWVVHYS....nKDTLRKRHYWRLDC.....KCITLFQNTT.....tNRY YKEIPLSEI..LAVEPAQN.....fsl  
SAREGWLFKWT....nYIKGYQRRWFVLSN.....GLLSY YRSKA....emrHTCRGTINLATA..NITVEDS-.....  
LLKQGELQQMStsrtrTKKLFREIYFLFN.....DLLVICRQIP...gdkYQVFD SAPRGLL..RVEELEDQ.....  
LMQEGTMMRKV....rTKSWKKLRYFRLQN.....DGMTVWHGSQ.....peSMPKPTFSISDV.eRIRKGQDS.....  
LLLQGNLLKIS.....-AGNIQERAFFLFD.....NLLVYCKRKStksingsIYIFRGRINTEVM..EVENVEDG.....tady/  
LTTYGELVLEA...tfrVHRVRNDRTFFLFD.....KILLITK KRG.....dhFVYKGHIPCSSL..MLIESTR-.....-I

DSYKGWLLKWT.....nYLKGYQRRWFVLGN.....GLLSYRNQG.....emaHTCRATINLAST..HFETEDS-.....  
VQHEGFLLRKRdanrksSNRSWVSLYCVLSK.....GELGFYKDSK.gpasggtHGGEPLLSLHKA..TSEVASDY.....  
IVAQKLLLLQDtdqdagLLPRCKERRVFLFE.....QIVIFSEPLDkkgfsmgFLFKNSIKVSCL..CLEENVES.....  
IRREGWLYYKQgkkgaggGLRQWKRVYAVLRA.....RSLSLSKERRagaaaagaGEDEAAPVCIGS..CLVDISYS.....  
TYKHGVLTRKTgktrprGRRGWKKFYAVLKG.....TILYLQKDEYrldkalseGDLKNAIRVHHA..LATRASDY.....  
EERSGLLNMTKaqqgrkLRKNWGPAAVVLTG.....SSLVYRERPIqgwaragSRPESSVDLGA..ALASGRQL.....  
PTMEGPLRRKTkegrkpALSSWTRYWVVLG.....ATLLYGAKSgtdrkhykSTPGKKVSVIGW..MVQLPDDP.....  
LYFEGFLLVKR.....sDHQEYKHYWTELRG.....TTLFFYTDKK.....sTIYVGKLDIIDL..VCLTGQHS.....  
TERNGNLYKKS...dgIRKVVQKRKCSVKN.....GFLTISHGTA.....NRPPAKLNLLTC..QVKTNP-.....  
GTRKGYLSKRS...aDNPKWQTKWFALLQ.....NLLFYFESDS.....sPRPSGLYLLEGS..ICKRAPSP.....krgtsske  
VIKAGWLDKNP...pqGSYIYQKRWVRLDA.....DYLRVFDNSK.....DAYSKRFVPVAC..ICRVAPI-.....  
IVMADWLKIRG.....TLKSWTKLWCVLKP.....GVLLIYKTQK.....nGQWVGTVLLNAC..EIIERPSK.....  
PELEGALYLKE.....dGKKS WKRRYFLLRA.....SGIYVVPKGK...tktsRDLACFIQFENV..NIYYGIQC.....kr  
SEKKGFLLKKS...dgIRKVVQRRKCAVKN.....GILTISHATS.....NRQPAKLNLLTC..QVKPNAE-.....  
VMKEGWMVHYT...sKDTLRKRHYWRLDS.....KCITLFQNDT.....gSRYYKEIPLSEI..ICLEPAKPS.....a  
TYKQGILARKMgkktpwGKRGWKMFTLLRG.....MVLYFLKGEIdgeslvghMVDEPVGVHHS..LASPATHY.....  
LVRHGELEVELAaappakLKLSSKAVYLHLFN.....DCLLSRRKE...lgFAVFVHANMAEL..QVRDLSLK.....  
KGLEGVIRKRSfcgrdqVCYRWSKRWLVKD.....SFLLYMRPET.....gaISFVQLFD-PGF..EVQVGKRS.....  
ARICAFWRKK.....WLGQWAKQLCVIRD.....TRLLCYKSSK.....dHSPQLDVNLRGS..SVVHKEKQ.....  
GTRKGYLSKRS...aDNPKWQTKWFALLQ.....NLLFYFESDS.....sPRPSGLYLLEGS..ICKRAPSP.....krgtsske  
PECLGLLHQL...rSTDVWIQH YCILKD.....GCLYFYASIR.....sTQASGGLYLQGY..SVSEQTHG.....  
LLKGSQLLKVK.....SSSWRRERFYKLQE.....DCKTIWQESR...kvmrSPESQLFSIEDI.qEVRMGHRT.....e  
SSHRSVLQQRVEvsIgehPCDRGEQVTLFLFN.....DCLEIARKRHdtrppasLKHIIHLMPLSQI.kKVLDIRET.....  
EALKEVVLRYSDeaamdSGARWQRGRLVLRs.pgpghsHFLQLFDPPK.....sSKPKLQEACSSI.rEVRPCTRL.....  
EALKEVVLRYSDeaamdSGARWQRGRLVLRs.pgpghsHFLQLFDPPK.....sSKPKLQEACSSI.rEVRPCTRL.....  
VIMADSLKIRG.....TLKSWTKLWCVLKP.....GVLLIYKTPK.....vGQWVGTVLLHCC..ELIERPSK.....  
LVKDGFLVEVS.....-ESSRKL RHVFLFT.....DVLCAKLLKhpfpdheIEdMKMKISALKS..EIQKEKAN...kgqsraierlkk  
PEIEGVLWLKD...dGKKS WKRYFLLRA.....SGIYVVPKGK...akvsRDLVCFLQLDHV..NVYYGQDY.....  
SMVEGSELKKV...rSNSRIYHRYFLLDA...dmQSLRWEPSSK.....DSEKAKIDIKSI.kEVRTGKNT.....difrsr  
VIFMSQVVMQH...gACEEKEERYFLLFS.....SVLIMLSASP...rmsgFMYQGGKIPIAGM..VVNRLDEI.....  
LVCCCQLYEVP.dpnrpQRLGLHQREVFLFN.....DLLVVTKIFQ.kkkilvtYSFRQSFLVEM..HMQLFQNS.....  
LLKRGEFLLEessifrKIASRPTCYLFLFN.....DVLVVTKKKS...eesYLVQDYAQLDHV..QVRKLEPS.....epllp  
GTRKGFSLKKA...aEASRWHEKWFALYQ.....NVLFYFEGEQ.....sGRPAGMYLLEGC..SCERTPAP.....prt  
DLSMGDLLLHTpaslgkWKEPELA AFVFKT.....AVVLVYKDGSSiyeewdpFRFRHMIPTEAL..QVRALPSA.....  
FLHSGKLYKAK.....--SNKELYGFLFN.....DFLLLTQITKspksnlqyKMYKTPIFLNEV..LVKLPTDP.....  
CIVHGYMSKMG...npFLTQWQRRYFYFLP.....NRLEWRGEG-.....EAPQSLLTMEEI..QSVEETQI.....  
AVMEGPLFLQS...qrfGTRWRKTWAVLYP.asphgvARLEFFDHKGrggrggsrRLDCKMIRLAEC.vSVVPVTV.....  
LVKRGELETAYVdtvifsKRMSKQVYFFLFN.....DVLITKKKSeesyvndYSLRDQLLVESC..DNEELNSS.....pg  
IQREGALRFMVaasgpgGTAQWQKCRLLLR.avagerFRLEFFVPPK.....aSRPKVSIPLSAI.iEVRTTMPL.....  
LLKDSFMVELV.....EGARKLRHIFLFT.....DLLLCTKLKqsggkttqYDCKWYIPLTDL..SFQMVEL.....ealp  
LKEQGQLLHRD.pftviCGRKKCLRHVFLFE.....DLLFSKLLG.seggssetFVYKQAFKTADM..GLTENIGD.....  
IKQIGWLTEQL.....PSGGTAPTALLTE.....KELLYFCSLP..qsrealSRPTRTAPLIAT.sSAHRLVHS.....gpsl  
LVYNGDLVEYD...adHMAQLQRVHGFLMN.....DCLLVATWLP...qrrgmYRYNLYPLDRL..AVNVKDN.....  
TAYEGHVRIPK...pagVKKGWQRALAVVCD.....FKLFLYDIAE.gkasqptSVISQVIDMRDE..EFSVSSVL.....a  
LLREGPVLKIS...fRRSDPMERYLVLFN.....NMLLYCVPRV..lqvgaqFQVRTRIDVAGM..KVRELTDA.....  
LIKEGQILKLA...aRNTSAQERYLFLFN.....NMLLYCVPRF..slvgsKFTVRTRVGIDGM..KIVETHNE.....  
VQMEGYLGRKHgpnkkaSNRSWNNLYCVLRN.....SQLTFYKDAK.nlalgvYHGEEPLALRHA..ICEIAVNY.....  
IRHLGWLAEKV...reGTRWKPRLSKLLL.....KTLVAKDSLKggkqewlsGILGNEFILITF..KLVHSGPG.....  
LELGTVMTVFN...arkSTPERRTVQMIMET.....RQVAWSKTA-.....DKIEGFLDIMEI.kEIRPGKNS.....kdferr  
LIHSGELTRVT...qPQARSQQRMFLLFD.....RQLIYCKKDL...IrrdvLYYKGRLDMDL..EVVDVEDG.....f  
PVKEGPLFIHRkgkqplASSSFKKLYFSLTT.....EALSFAKTSS...skkSTFIKLASIRAA.eKVEEKSF.....

KGLEGMIMKRSccghgrACYRWSKRWLIVKD.....SFLLYMKPDS.....GAIAFVLLVDKE.fRVKVGGRKE.....  
AQMEGFLNRKHahnkkaSSRSWHNVYCVINN.....QEMGFYKDAK.saasgipYHSEVPVSLKEA..ICEVALDY.....  
LLCHGELKNKS.....---GHKLYIFLFQ.....DILVLRPVT.rnerhlyQVYRQPIVQEL..VLEDLQDG.....dvrmggsfrg  
SIKEGILKLEepskilSGNKFQDRCVVLRD.....GHLFIYKDPK.....sSKHDKMFPLRAM..KFYLGVKK.....  
VSKKGYLHFLE.....pHTAGWAKRFVVVRR.....PYAYMYNSDK.....dTVERFVLNLSTA.QVEYSEDQ.....  
IQREELLSFMGltsgggGQPQWQKCRLLLRSegegsggSRLEFFVPPK.....aSRPRLSIPCSTI.tDVRTATAL.....  
LMKLGTVARRG.....AMGIWKEFFCELSP.....leFRLYLSDEE-.....RTCVEESCSSLRC..EAVGPAH-.....  
IRHLGWLAEKV...pgeSEKQWKPALVVLTE.....KDLLIYDSMP..rkeawFSPVHSYPLLAT..RLVHSGPG.....  
LVCCSRLFEVT.dvnkiQKQAAHQREVFLFN.....DLLVILKLCP.kkksftYTFCCKAVGLLGM..RFHLFENE.....  
IVKQGYVRIRS.....rRLGIYQRCWLVFVK.asskqpKRLEKFSDER.....aayFRCYHKVELNNV.kNVARLPKS.....  
FIRLGSLSKLS.....-GKGLQQRMFLLFN.....DVLLYTSRGL...tasnqFKVHGQLPLYGM..TIEESEE.....  
SRLEGWLSLPV..rntKKFGWVKYVIVSS.....KKILFYDSEQ...dkeqSNPYMVLIDIDKL.fHVRPVTQT.....  
FIREGCLHKL.....-KKGLQQRMFLLFS.....DMLLYTSKSV...tgashFRIRGFLPLRGM..LVEESENE.....  
FLRQGWLLVVP.....PTGEPRPRMFLLFS.....DVLMAKPRPihllksgtFVCRALYPMSCQ..HLSRVFGH.....  
LIYTGEMAWIY...qPYGRNQQRVFFLFD.....HQMVLCCKDL...irrdiLYYKGRIDMDKY..EVIDIEDG.....rd  
LVLEGTFRIQK.....---AKKERTLFLLD.....QLLLITKKRD.....dtFTYKAHILCGNL.mLVEVIPK-.....-EPI  
LIHSGELTKIT.....RQGKSQQRIFLFD.....HQLVSCCKDL...lrrdmLYYKGRMDMDEV..ELVDVEDG.....r  
IMKQGYVRIRS.....rRLGIYQRCWLVFVK.asskqpKRLEKFSDER.....aayFRCYHKVELNNV.kNVARLPKS.....  
GRGGAAGLTS...gggGQPQWQKCRLLLRSegegsggSRLEFFVPPK.....aSRPRLSIPCSTI.tDVRTATAL.....  
RGFEGKLTAAQgpeagglSSRGRERRVFLFE.....QIIFSEALGgrggaqpgVYKNSIKVSCL..GLEGNLQG.....  
LELQGELELGGvftSRPRFTPLCLLFS.....DLLLLITQPKS...gqrlqVLDYAHRSVQA..QQVPDPSG.....  
LIKEGSIQKLS.....aKNGTTQDRHLFLFN.....NVMLYCVPKL..rlmgqKLSVREKMDISDL..QVQDIVKP.....  
PELADYIKVFK..pkiITLKGKQYWCTFKD.....TSISCYKSKE.....essGTPAHQMNLRG..EVTDPVNI.....  
LLEGPVRVKE.....GREGKMDVYFLFS.....DVLLVTKPQR...kadraKVIRPPLMLEKL..VCRPLRD-.....  
VSKKGYLHFKE.....pLSSNWAHFVVVRR.....PYVFIYNSDK.....dPVERGIINLSTA.QVEYSEDQ.....  
IESQGELILQEvdpktLIRKGRERHLFLFE.....MSLVFSKEVK.dssgrskYLYKSKLFTSEL..GVTEHVEG.....  
LLHSGKLYKTK.....---SNKELHAFLFN.....DFLLTYLVRnskssaqfRMYKTPIFLNEV..LVKLPTDP.....  
VRKAGALAVKNkvesaTRRKWKHYWVSLKG.....CTLFFYETDG.rsgidhnSVPKHAVVWENS..IVQAVPEH.....  
LILQDAFQVWD...pksLIRKGRERHLFLFE.....ISLVFSKEIK.dssghtkYVYKNKLLTSEL..GVTEHVEG.....  
TAYKGYVKVPK...ptgVKKGWQRAYAVVCD.....CKLFLYDLPE.gkstqpgVVASQVLDLRDE..EFAVSSVL.....  
LTAQGKLLQQDieldagMQSRTKERRVFLFE.....QIVIFSELLR.kgsltpgYMFKRSIKMNYL..VLEDNVDG.....  
LTAQGKLLQQDieldagMQSRTKERRVFLFE.....QIVIFSELLR.kgsltpgYMFKRSIKMNYL..VLEDNVDG.....  
EQMEGMLCRKQafnkkaANRSWQNVYCVLRR.....GSLGFYKDAR...aasagVPYHGEVPVSLA..RAQGSVAF.....  
DTKHGMMKFREllglIPSGGFHDYFILNS.....SCLRYKEVR.....sHRPEKEWPVKSL..KVYLGVKK.....  
PEIQGFLQLRG.sgrgsGRKLWKRFFCFLRR.....SGLYSTKGT...skdpRHLQYVADVNES..NVYVVTQG.....  
LLEGLRMKE.....GKDSKMDVYCFLFT.....DLLLLVTKAVK...kaertKVIRPPLLVDKI..VCRELRD-.....  
VTYMSQVTIQC.....aGSEEKNERYLLLFP.....NLLLMLSASP...rmsgFIYQGKLPPTGM..TITKLEDS.....  
LETSSYLNVLV.....NSQWKSRCFVRD.....SHLHFYQDRN.....rsKVAQQPLSLVGC..DVLDPDPS.....  
YYKERLLYLEecchgelKNNRGVKLHVFLFQ.....EVLVITRAVT.hneqlcyQLYRQPIVKDL..TLEDLQDG.....evrlg  
VRKAGWLFFKPrklelvARRKWKQYWVTLKG.....CTLLFYETYG.knsteqnSAPRCALFAEDS..IVQSVPEH.....  
PEIHGFLHAKE.....qGKKSWKAYFFLRR.....SGLYFSTKGT.....sKEPRHLQLFSEF.sTSHVYMSL.....a  
GHRKGATKMKD...fARFKPMQRHLFLYE.....KAVMFCKRRFegadrypsYSFKHCLKMEDV..GITEHVKG.....  
LKEQQQLVRQD.eftvRAGRHKACRRVFLFE.....ELLFSKPRR.gpagvdiFTYKRSFKMADL..GLTECCGE.....  
LHLEGALCWKS.....TSGRLKDVLAULLT.....DVLVLLQEKDqkyvfasvDSKPPVISLQKL..IVREVANE.....  
GTRKGYLSKRS.....aDNPKWQTKWFALLQ.....NLLFYFESDS.....sPRPSGLYLLEGS..ICKRAPSP.....krgf  
LIHEGCLLWKT.....ATGRFKDVLVLLMT.....DVLVFLQEKD.qkyiftsLDKPSVVSQNL..IVRDIANQ.....  
PKIDGELKVRs.....iVNHTKQDRYLFLFD.....KVVIVCKRKG.....ysYELKEVIELLH..KMTDDPMH.....nkdik  
SRIEGWLSVPN..rgniKRYGWKKQYVVVSS.....KKILFYNDEQ...dkeqSNPSMVLIDIDKL.fHVRPVTQG.....  
LIHEGCLLWKT.....ATGRFKDVLVLLMT.....DVLVFLQEKD.qkyiftsLDKPSVVSQNL..IVRDIANQ.....  
LIKEGHILKLS.....aKNGTTQDRYLILFN.....DRLLYCVPRL..rlgqkFSVRARIDVDGM..ELKESNL.....  
LLMQGSFSVWTtkvkelARFKPMQRHLFLHE.....KAVLFCKKREegyekapsYSYKQSLNMTAV..GITENVKG.....

PQGDGEIRITT.....IDKHTKQERHIFLFD.....LAVIVCKRKG.....dnYEMKEIDLQQY..KIANNPTT.....dke  
PKIDGELKITS.....VERRSKTDRYAFLLD.....KALLICKRRG.....dsYDLKASVNLHSF..QVRDDSSG.....e  
PEIQGFLQVKE.....vGRKSWKKLYVCLRR.....SGLYYSTKGT...skepRHLQLLADLEES..SIFYLIAG.....k  
FIMEGPLTRIG.....--AKHERHIFLFD.....GLMISCKPNHlpgyssaeYRLKEKFVMRKI..QICDKEDA.....  
LVRDGSVFLKS.....TTGRLKEVQAVLLT.....DILVFLQEKDqkyvfasiDHKSTVISLKKL..IVREVAHE.....  
FIMEGTLTRVG.....--AKHERHIFLFD.....GLMICCKSNHlpgassaeYRLKEKFFMRKV..QINDKDDT.....  
LLHDGLVYWK.....ATGRFKDILALLT.....DVLLFLQEKDqkyifaavDQKPSVISLQKL..IAREVANE.....  

---

EVKSGFLEKRS.....kFLKSYSRGFYVLT.....SFLHEFKTPD....khkfSTPLMSIPLVEC..TVTEHSKK.....tk  
RYLQGYLLKKR.....rkRLQGFKKFFTLDF.....ryGTLSYYLNDH.....nQTCRGEIVISLS..SVSANKK.....  
ADFSGWMSKKG...sgAMSTWKTRFFTLHG.....TRLSYFSSTT.....dTRERGLIDITAH..RVPAKED.....dkh  
ADCSGWMSKKG...tgAMGTWKQRFFTLHG.....TRLSYFTNTN.....dEKERGLIDITAH..RVLPAADD.....drl  
EIKSGFLERRS.....kFLKSYSKGYVLT.....NFLHEFKTAD...rkkdLVPVMSLALSEC..TVTEHSRK.....nst  
PTYKGYLKKWT.....nFAQGYKLRWFILSS.....dGKLSYYIDQA....dtKNACRGSLSNMSSC..SLHLDSS.....  
IYKEGYLLQDG...gdLKGKIENRFFKLHG.....SQLSGYHEI.....-SRKAKIDINLL..KVTKVLRN.....ediqadnggr  
KKKSGWVSYKD...dgiLSFIWQKRYLMLHD.....SYVALYKNDK.....qnDDAILKIPLTSI.iSVSRTQL.....  
QVCSGILYTKVkkkklfNRAKWQKFNVELTN....tsFNLYSFKTG-.....-KLKSIKLDKI.iDCIELDNN.....sk  
QGKQGYLVIRShafkdMIDRHTTKWFLVRN.....SYLTYVSDLS.....sTTPLDVFLIDWK.fKVRFSGNKleefgiendanr  
CIKAGYFLKKS.....eLLPTYHQGYFVLTS.....NYIHEFQSSDrgirkkysLAPIMSIPLNDC..TLKDASSThkfkgkpkpknkt  
KGLSGWLYMKTtvghdpKRVVWVRRWCFLQN.....NVFGVFLSP...sktyVEETDKFGILWI..TVEYLPKE.....  
PTYKGFLLKWT.....nFAHGKLRWFILSG...dGNLSYYKDQS.....hvDRPRGTLKVSTC..RLHIDSS.....  
VKKEGWISYKV...dgIFSFLWQKRYLVLND.....SYLAFYKSDK.....cnEEPVLSVPLTSI.tNVSRIQL.....  
VLQRGIMIRMT.....rRRRKFYEFKLINN.....GQIIWKDGS-.....-KYLELDSVKDI..RIGDTAST.....yqeevdk  
LVLSGTVYKKR...dLWLDPTPVYIALLD.....NCLLITEEIS.kgetqkyKLIERPIPIDYL..SLEKRKIPkssgnhmstaiydrkt  
VKMSGNLNIRT.....KLIRSTRYWCVLKN.....HLFSMYTSST.....eIYFPVLTIDLREV.qKIETQKHT.....lr  
RIHSDLVHRSD.....QSQHLHHLFTLPT.....RSASEFKKADrsryltdEALYKSFTLQNA..RFGIPTDY.....  
ISKFGELLYFDisttnsSSEPEREFEVYLFE.....KIIILFSEVVsasliikKKSSTASISAS..NITDNGSnsnsnsssslfksar  
NVKDGSLLLRR.pktftGNSTWRVRYGILRD.....DVLQLFDKN-.....-QLTETIKLRQS..SIELIPNL.....pedi  
LIQKGPLYQKP....hKHSVFSKYVVLIS.....GFIVLFHCFHgfakevleYAHYVTIPIDDC..YLYSGTTTdrftdeinygshalp  
KKIGGFFRRPFsiggnfTSSSNYSLSILSQ...evsSNKSILPSILpevdsmqIHDLKPSYSLKTF..EIKSIMEI.....  
TVIGEYLFKYprlpgpGFESRHERFFWVHP.....YTLTYWSASnpilenpaNTKTKGVAILGV.eSVTDPNPY.....  
TSRRTSLSYLN.....KDSEWERVKIQVKE.....GRIFIKIKPtidyfkdISSYFAYSLEA..EAHVVDN.....iiigsgamk  
PEKSGWLYMKT.qvgkpTREIWWRRWCFLKN....avFGMFLLSPSK...tyveETDKFGVFLTNV..RYDPEED.....  
RYHEGVFLILQnnngthAARKWKDVYGVLLG.....TQLALWDAKEsekkikevASKPTYINLTD..TLRDLDNS.....  
RYHYGIFLILHktdgtpAARQWEECYGVLLG.....TQLALWDAKEntstmkkaASRPSFINFTDA..SVRSLDAN.....d  

---

SAKQGLLAFSsdlqvGKSGWHKYWVVDLH.....GKICEYANWK.....qsiELHTEPIDLLMA..TVRPAQSV.....  
SAKQGLLAFSsdlqvGKSGWHKYWVVDLH.....GKICEYANWK.....qsiELHTEPIDLLMA..TVRPAQSV.....  
IFKEGLLLFGtdlamvSKAAWHKHVIVVEN.....GSLWEYANWK.....dsvKSNVSSISLKHA..SADKVRKQ.....  
ISKIGTLNVYSfrffssLFRKRKPRTFILTN....fgRYLCVASDGE.....grKTVKEEIPKSV..GMRCRMVK.....  
ISKIGTLNVYSfrffssLFRKRKPRTFILTN....fgRYLCVASDGE.....grKTVKEEIPKSV..GMRCRMVK.....  
AQKKAYERRYK.....NFTTTSSSFDTLQG.....idTEAMEYEFKvftppleeFSPDTSYSLVNA.fAYCDRDKK.....  
AQKKAYERRYK.....NFTTTSSSFDTLQG.....idTEAMEYEFKvftppleeFSPDTSYSLVNA.fAYCDRDKK.....  
QHMSGYLKWT.....nYKSGYKLRWFTLNN.....GVLSYYKNQD....dasSACRGSINLKLA..RLVHDPK.....  
YIKQGILKFQShshkfrKKEVWSTVLAVLQR.....DVFTLYNLNTsydpkddlISKVGKPVIKTT..IIASLAKP.....fpss  
AQKEGVLLKYI.....ENGLVSRFYFLKD.....NILYFAENRN.....SPVLGTIHLKDA..QVNRYNAN.....lpifsiidpph  
AQKEGVLLKYI.....ENGLVSRFYFLKD.....NILYFAENRN.....SPVLGTIHLKDA..QVNRYNAN.....lpifsiidpph  
TKRQGWLLRNlssskadNKAIWRKYWFFVDN.....GYVGYLINDA.....nggVFESEKIGVLLC..KFSVLPNS.....  
ADCHGWMRKRS....dRYGVWKSRYFVLKG.....TRLSYYHSLN.....dASEKGLIDMTSH..RVTKTDDI.....  
ADCHGWMRKRS....dRYGVWKSRYFVLKG.....TRLSYYHSLN.....dASEKGLIDMTSH..RVTKTDDI.....  
IIRSGWMLKE...dkmKYPWTKKWLVLSS.....NSLSIYKGSK.....sESAQVTLKDI.qKVERSKS-.....  
SIQNGCSLLRI.....TKKKVRQRKVS LDP....isGYLMLDKNTG.....kaYKKL CVDDIKEI.rQGRDARNY.....req  
SIQNGCSLLRI.....TKKKVRQRKVS LDP....isGYLMLDKNTG.....kaYKKL CVDDIKEI.rQGRDARNY.....req

VLKSGWLIKKG.....hATSTKKQLWAVLRR.....DQLSFYKDE-.....-----KDI.sAVAYYKEK.....-SPt  
QIISGTLKKR....rkKGQGYARRYFTLNM.....veGTISYYANEN.....sSVMRGKIPLSIA.VISVAAE-.....  
WHRRGMISYKKsknrwVAGYWKKKYCIVDS.....GKLIFYKSDHdpnacsnvSPIHREFGLQSC.LASPNLPP.....  
PIMAGYLIRKT.....SFLKKKQRGFYAFT.....hsGYLYEFKSSD...slqdPEPEFALYIPDC.LIGRPSE-.....  
LLCDGYLCQQG.....gDCPYWRRRYFQLIG.....SKLVAFQQFS.....KVRRTIDLSEA.tHIVDDNHY.....sde  
HGKEGFATLKRccnttmMKTRSQPFWIIVSE.....SCIILCDNML.....SMQPADVFIWDV..DFEITRKN.....frkaks  
VLMQGTIHWLH.....gNLHRWSKCWAVVRG.....YGMTIYNTNR.....eYKPVKVIPIADI.qDVAEINVP.....  
LYNEGYLYRLE.....-DSSIRRRFVVLRS.....KQLNFYAEKG.....GQYLDTFQLSKT..VVSIPMVN.....fsea  
LYNEGYLYRLE.....-DSSIRRRFVVLRS.....KQLNFYAEKG.....GQYLDTFQLSKT..VVSIPMVN.....fsea  
PSLASEQMHDS.....dADSLFQSANDHLNRakatqdcRGLLFYSKSQ.....stSVPSGIINLTDA.vSIEPGTG-.....

---

cldkPRPNMFIVRCIQW.....ttvIERTFYADSADFRQMWIEAIQAVSS  
...lfekPRPNMFMVRCIQW.....ttvIERTFYAESAEVRQRWIHAIESISK  
.....SRPFMFEIFSISD.....gqikackteqdgrlvegrhSIYKICAVNDEDMRSWINAISRMMA  
.....GRRGLIELHMkNK.....-THRLLENINEAIRWKECIEQVIR  
...svlakHPPHCFEIRTtTN.....tvfcvgedyhafsggppkIPRSMSVRPSSNTTMWFQFIKESLQ  
.....--TSCIVISGqSQ.....-TFHVKPNEMDRQQWTSNSLEYMRH  
RyNT.....glsRELVLMAPQTDNCNKWVSQLRRFIE  
.....-NNSLFTITVeGK.....-TFHMQGRDLRERNQWVRILENSIR  
...DKKNCLLIAHpQL.....pSAIIVAASDHQTQEMWLKALRSATK  
.....--KNIITIVCeTM.....-QLQFEAPGGVEATDWLNAIERQRN  
...tapvikglTDVISFRMRTgTQ.....qgvRTHTIRVETHAELARWVRAVVIGGY  
...GAAYAFQLITsTD.....-KMNFMTESEERTTHDWVTILSAAIK  
.-SGTFFIHTpN-.....-RVYYLFDLEKKADEWCKAINDVRK  
-ERTIWITHgQD.....lvnvQSFFLVAESVELAKTCRAGINDILK  
...dpelsaqGGKHFFTAIKeGD.....-ELKFATDDENERHLWVQALYRATG  
.....aHSTHMIELNEdNR.....lhpvhpsifevncfriaSTYYSCRTPLERAKWMENLRKTMN  
VINnCL.....MRWEFCAGSLEERDEWIIQAIGGEIE  
...empvdcddsmRANNVLMIKMpRR.....-CLYLAPSQPSARRWAECQLTAQR  
elvpsersYEPNFLTIVSgTS.....itnlfkTHFVCMEKNEKRLHEFAATLFTVVQ  
ggghqeesMLNCIFGVGFrFE.....nivKDLYLVAKNDEEMTLWVNEICKLCK  
----SdEK.....-----GSSDLAQSWTTAIQSALM  
.....-DENEFSISMgEN.....VVWYLKAENSQSKLLWMRSVVRET  
.....-RNYGIEIKCrRT.....-RYVLSAMTPGIRDSWVSALQQNRH  
.....aKRKNSFRLLlqDG.....SEFIFSCPDERQMLEWVAKIKFHAH  
.....keteGIPTGLIITNsQH.....-ELHLKCRRLQDTATWKYIIEQAMG  
...kkarkSLRKAFEIFTaDN.....TSMILKAKDEKNAEEWLHCLQIAMA  
diaydwlsssfsKQRHVVRIVTqNR.....SEHLIELNTESEMLSWISVLQSSSE  
..-HVTAADLRNvDD.....sqlpKIFHIMYDD-----ASCNSSRH  
...svvedicpfPNSFHIDVWApKM.....dtsdprgierLRVMLAADTAQDLQTLWLSLINSTSK  
..nssprrdKRDNCFLIETpLQ.....vpnHYLSFEAVSAFELF-----EQAYY  
.....-KFTFSVRVgAR.....RMYTMTAEDEQTQMKWLAILDLAAN  
.....evaipgdVMRNVLTIKLqTR.....-SVHIVAPTPKSAERWAACLQNAQT  
.....qKKKNVLSLRLpIG.....AEYLFQCGSEEDMQRWLTTELQVATG  
..glEKHGWIITpAK.....-SFAVYAATETEKREWMLHIERCVT  
..remsqgaEHEFHIELLIdQD.....pdliekRRVILAAESSDHLNSWLSAINDTLD  
.....hpLHSHRVASSVdPM.....nggggggtpltkisyepRRSDVGANS-----GDGTS  
.....tGNAHSILLAFnKT.....redqpSIIYIKADTTEEIRWWQNGLSKYAN  
.....iDRIGCFELVTPTR.....-IHLLQADSESLCQDWMRALQRTIL  
.....dkidNHENCFKLFYgSH.....-TYFFRTDSYFFERWVDSIFQAAI  
.....eadviahqkgDIPKIFRVTTtQI.....InssseysssskFYTLFMAETEEERKRWVVALSELKT  
..ekkyksptPWCISIKLTAIQM.....krsqFIKYICAEDEMTFKKWLVALRIAKN  
...kiGKDFTFEIKFkST.....aRSFIFAADSFKSLGRWVSLLTISPI  
.....fmSRNHKFALFYpDG.....kniykdyKQLELGCTNLDEIDAWKASFLRAGV  
:kkyefqelaPESRCFSVIFsHA.....kflhKSVDfSADSKETRDKWVSVLTHLIS  
....ktSKKNIFRITAApL.....-DYHFSCFTALDWRNWTQKMKMAKE  
sgaaNAGKVLKLLIfPE.....-SRCYLCESARIRTLWFDELEQAKR

.....-DPLRFVIKsDP.....tqpTSFIANAQSQEEKDEWNRKMSSELLD  
.....-GKTVLEIRGsDA.....dkAAILLESEETQMLEEWLVALHTAIA  
/ftdlQEECLFSIIYgDN.....yETLDLIASSGDDANIWVTGLMALTS  
--ADSFLIGWpFT.....-NYLVHFRNTEEKDEWFELLSCCVQ  
.....kvmdGENNVITLHNaDI.....-SIVFAAPD---RASWIEDITEAIK  
.....kKKSfVFRVRIaHG.....GEILFQTSNQKELQEWCEKINFVAA  
)lgatsnlvGRPHLFLCTLMRN.....ardkqTELLLSADSETDRERWLSAVRPPTS  
.....rdvqkkKQRKYIQLELcNT.....KKYLLRGPNDTEAVEWYKSLEEVVA  
...KDGFCFLFHpMD.....msiwgnrgplgqsfgsftlnpInTSFLICAPSDQAGRCWMDALELSFK  
...-EKGRFEIHSnNE.....-VIALECSSDKQRNEWMKALQSTRK  
.....DKRFCFDVcVeEK.....nDVMTMQALSEKDLCEWIDAMDGAKQ  
...EEPLSFQVLSfDN.....prAQYVFMASMEQKRTWMQELKRMMML  
...ERIRCLQIRSRvK.....-SALIIFSSSEKERNQWTDDLTKAQY  
..tiKGETAIIVKLRdG.....fkePKICLTNSDEISLKEWHTSLRTAHK  
.....-GASRFEVWDdAK.....tDAYVIETIDQTARTKWIQRLGKSET  
veetrngrDHEFHIELLIQT.....psllekRRVVLAESSDHLASWLNAINDTLF  
..--GGSIFIRCgDV.....-GVDFTAAYSLGGVTEWYNEICDAID  
pvkrpnpvpegnSVHHLVGIGMnPK.....adPCHWILFSSSDSIESWFTEITKTLp  
..dqatpmSLKFAFVIIHTR.....yyqvVGIYTLQAADKADKELWIEKFQESIE  
/ksggtitrRTQYVIIMTRdRN.....enneiTQLTFYFKNEATRNNWMTALLLSKS  
...EVTNCFKIEShDK.....sslpKIYHFVCKNPEEKQWMAVLVKVTT  
.....dTCRFGLRVGTvSS.....ndNRIDLKANNHHTKVKVVQKIRDLT  
...EREHSFYLRGsDG.....tgpkrCVELFTPTQKEKNDWVDSIFSIIID  
...-KPNCFELFIpDN.....kdqvikackteadgrvvegnhTFYRISAPTTEEKDEWMNSIKAAS  
...RKPNCFELYIpNN.....rgqlikackteadgrvvegnhMVYRISAPTPEEKDEWIHSIKSAVS  
...RKPNCFELYNpSH.....kgqvikackteadgkvvegnhVVYRISAPTPEEKKEEWIKSI---K  
...KKPNCFELFIpDN.....kdqvikackteadgrvvegnhTFYRISAPTTEEKEDWIKSIKSAIS  
...HKQFCLEVYSIHQ.....kgetikacktetdgrvmgkhHSYKLTASEEERAEWIQAI---S  
.....-RPNTFVIRCIQW.....ttvIERTFHVDSNSEREWEWIRAIQAVAN  
.....-RPNTFMIRCIQW.....ttvIERTFHVDSSDERDEWMRAIQMVAN  
.....RKPYCLELYNpNS.....rgqkikacktetdgrvvegnhQSYTISASTAEERDQWIESISLN-E  
..satkspTPTLTFCVKThDR.....-LYYMVAPSAMRIWMDVIVTGAE  
hlqlliinspNPSLTFVVKThDR.....-VYYMVAPSPEAMRIWMDVIVTGAE  
..sfKMKNMFQVIQpER.....-ALYIQANNCVEARDWIDILTKVSQ  
atkvktenpNPSLTFVVKThDR.....-LYFMVAPSPEAMRIWMDVIVTGAE  
.....nkdIEHSFIFDIKTIDR.....-IFYLVAETEEDMNKVVNRNICEICG  
.....krkefQDSFVFDIKTaER.....-TFYLVAETEEMNRWVRSICQLCG  
.....-KAKCIDLDTeEN.....-IYHLKIKSQELFDEWVSKLRHHRL  
.....-RARRIDLDTeEH.....-IYHLKVKSPDVF DLWVCKLRHHRL  
...ttsSNVFPFKIVHfSK.....rhRTWYFSAASEDERKEWMRHLRREIN  
...eimMRDNLFEVVTtSR.....-TFFVQADSPEEMHGWIKAISGAIV  
.....qERVNCFCLVfPpER.....-TFYLCAKSGAEADEWIKLRWKL  
.....dlmMRDNLFEVVTtTR.....-TFYIQSDSPEEMHGWIKAISGAIV  
atkvpvpseREKALFKRNSfSP.....spPAVLLLCSS-----CTICF  
..sgdIIIRDNLFEIITsAR.....-TFYIQTDTPEDMKGWIMDIASKIQ  
/pipcDYKYPFQIIHdSY.....-YLYVFAPDND CRLKVVKALKEAIQ  
.....-KENALNIVTeDR.....-TYQIYAESPEDASGWFNLSRVHS  
odakrheVDGNLFEIITsDE.....IHYYLQAATADERKDWIRAVQSVAK  
..gtpagvkgkVQGNLFKIITqMD.....THYYIQAPTHEERMDWIAIRRV-T  
CIDLDTeDS.....-IYHLKAKTRSLFDLWVMQLRHHRI  
safewisktfKCSSSSVLFMkTE.....nptdkvqREYFFIGDSSEEVNRWFNAIFGVLK

.....yeNRPLVIKLETnTS.....EEHFLEACMREERDEWAAAIDAAVQ  
.....-ARRIDLDAGDN.....-LYHLKAKSQDLYFIWVTKLSAHRM  
.....dGKRCMFCLKTITK.....-TYELSASDTKQRQEWTTAIQTAIR  
.....KWKCGVIVETpDR.....-QFVFMCEQERDQREWVEALKTVIS  
-NFKTFFVHTpNR.....-TYYLMDPSG-NADKWCKKIQEVWG  
.....-KENGIDIVMpGR.....-TYHLVAETAEDSSHWFSVLSQVHM  
..lfGRPNCFQIVVqHF.....seeqYIFYFAGETPEQAQDWMKCLQTFCN  
wpwiqkhfkcPPSSVLFITVeTR.....-DYFLIGQNSDDVDSWLNAITTALQ  
.....KKKFAMKASHIHV.....LTLYFAAESMKDMNKWLAKLTQASN  
.....RKKFAFKACHpKI.....KSFYFAADNIEDMNRWLSLMNMAAA  
mgapkniDDKAFFDLKTtKR.....-VYNFCAQDSSNAQSWMDSIQGCLS  
.....-AQTFQLITeKK.....-TFYLAADSPNILEDWIRVLQNVLK  
..fsKRALVFKVSTaKN.....QDHYFQATHLEEREHWVKDIRRAIT  
otkrqhQNQHFLCQTaTR.....-IFYLLAKTAEEMNDWVQNIGQICT  
.....RRKHAFKACHpKI.....KSFFFATDHLEEMNRWMNRLGLAAI  
.....dGKRCMFCVKTINK.....-TFEISAPDSRQKQ-----ELLAE  
.....dsiTRKFafkVEHaGT.....RTYYFSADSQKEQEEWQAMSEAAR  
.....dhiSRKYAFKAeHtGM.....RTYYFSADTQEDMNGWVRAMNQAAL  
.....-GQFCFLVfGP.....gIRTYRLAADDHPSQESWIAALFCASH  
.....-RKYAFKATHpNM.....RTYYFSTDTAKDMESWMKVMsDAAM  
.....KNKYLIAlYtkDE.....-YFAVVAESEQEQEEWYLSITELMT  
....pAQKLQFKLYHkNT.....LyyIFRAEDIPTAQRWIEAFQEAMI  
wdwiqkhikcPPSSVLFMTVeTR.....-DYFLIGQNSDDVDGWLNAIVTALK  
..keGRRCLFCVKTsVR.....-TYEMSASNLKQRVDWMQAIQMAFR  
.....nrefcARPNTFELITvRP.....qreddretlvsrckdtlcvTKNWLSADTKDERNLWMQKLNQILV  
.....-DNCYFTVKCfDD.....SVHHFKVNPEESRKMWLEAIEEHS  
TMkNG.....KKKMLAAESAPIRQEWMDQLWKAML  
PLVNCLKCrHG.....yhpdchtpsiepevdpnswicRQCvFAVAT-----KAISMVEE  
vNY.....dvtsaRDMLLLALSQDEQKKWIGHLGKKIP  
.....KRKYVFKMCHpRF.....QNFFFAADNVTDMSKWINCLITAIQ  
.....-EEGLFEIHTeGK.....-EFLKAPNRQVMHYWLQQLQK-R  
.....KNKHLVALYtkDE.....-YFAIAADSEIEQESWYEALVDLHN  
...SEEFaFAIKFeCA.....kaRVYKMAAENQAAMESWVKALSRAF  
ENKRSFTLTPYR.....-AFSFMVDSESEKQRWCESLTECVS  
...vRETGYWNVSvfGH.....kHSYRLYSKLQTEASRWANAVQTVID  
.....tyKQTYWVSLTVyGR.....kHCYRLFTKHYNEAVHWACAVQKVID  
.....eGKKCLFYVKCsDK.....-SFEISASDKKKKQEWIQAQTCIT  
.....KHRYLIAlYtkDE.....-YFAVAANEQEQUESWYGDLTDLLS  
sappDRHYPFQIKDyAE.....DTVVRFNKD-----LMQKY  
.....nstEKPHAFQVILtEH.....QPLELSAENELEMADWMLLLCQSVS  
.....sKRPNVfYLRTaDW.....RVFLFQAPNAEQMQSWITRINTVAA  
..ksrskKNHSKFTLLRsRQ.....pgntvPNLVFLAVSPEEKESWINALNAIT  
....vdHPPTGFRLCQsKY.....-IHCFTAETEEVKLRWLKVRKAVI  
.....KHKHLIALYtkDE.....-YFAVATENEQEEDWFTVLTDLMN  
..ksrskKNHSKFTLLRsRQ.....pgntvPNLVFLAVSPEEKESWINALNAIT  
.....driERRFAFKMSQsHL.....-TVYFSADCEELQRRWMEVLSRAGR  
...mAMANQWLIRTPRK.....-SFYVSAESPEEKIAWMGHIEQYRT  
.....--NKFEVVTtLR.....-TFVFRAEKEGDRQDWLEVLQAASV  
.....aeacpgENMAAFcVETeEK.....-RLVFAAERE-SCGEWVNIICNIAF  
.....KNKHLIALYtkDE.....-YFAIVAENEQEQEEWYQALSELMS  
.....ccARPHTFELVETST.....fqkedsqtllkdvwMECWFSADTREERSDWMEKLNQTL



.....-KNYGFQIQTrDA.....-VFtLSAMTAGIRRNWIEILKKNVR  
...fKKKHRLVLIrSPK.....sgnkvQDVKLQAPTPEEKEAWIKALCEGIN  
.....-RRFAFELKMqDK.....STYLLAADSEGEEMDDWISTLNKILH  
....aDDKFLFEIIPgGS.....tdrerDAYVLMATSQSEMEEWVRWIRKAIG  
.....-EEGTFHIQTpER.....-TVILKAANRDAQMYWLQQLQLKRA  
.....ERRFCFEVSpTK.....-SCMMQADSEKLRQAWIKAVQNSIA  
...titetGPVFTFELYLrSQ.....RVLVFGVETS DAHQDWTNAIAKSFV  
.....tGQKNALCIVTpEQ.....-EYFIRGDNKEIINGWSEQLAVYPR  
.....ncpkETMAAFCVETnEK.....-TFVFAAEKN-VTNDWVEKMCEITF  
.....-----IPaGK.....-PRFVHSVTE-----  
fannnfDPNCCFSIYHgDH.....vESLDLVSTNGEEARTWITGLKYLLA  
.....-DDSTFTITVdQK.....-TFHFQGIFP-----GAGG  
....kshskKNHskFTLLRcQH.....pgnksPNLVFLAVSPEEKESWINVLNTAIT  
.....pqskAQNICITNqyGG.....eeVTHTLSADSREDTQRWMEAFWQQFY  
.....-DNKFEIVTsHR.....-TFVFRADNDVQRskWCSTLQERVK  
sgfidKFRYTFELYLmSD.....KLVQFGLETPDALHswARAIGKATT  
.....rkdaKRDCCFEVSAPDK.....RVYQFCAASEKEAKEWVEHIDFLIK  
...rkdsKKSSCFEMSApGR.....RSYQFTASSPREAREWVDQINFLVK  
...NINNSFTVITpFR.....-KLMLCAESRKEMEDWISALKSVQK  
....pdePGRHLFEIVPgCT.....gekdrsalsHEAFLLMANSQNDMEDWVKAIRRVIW  
.-ERKGLEITTpFK.....-SFCFTVESEHERDEWIEAVQESIV  
...drnLEAARLNLRMkDG.....-EIKLTAPSLEARELWKGFLYSVVD  
.....-KNYGLQLHMrDG.....-LVtLSAMTSRIRRNWIDTLRRKIS  
.....-ESSVFQLYHkST.....LFYTFRAQDSHTAQRWVNAMEEATV  
G.....AEYILETIDSLQKNSWVADIQDCID  
.....KNKHMIVLYTrAE.....-SFVVAENEADQEEWYQAMVELQC  
.....qkpKAefCFVIHAISR.....-RYFLQANDALDLKEWVIANNATK  
.....-DNTRLELIpGE.....QHfYVKAVNAaERQKWLVALGSSKA  
.....sSRKNVIQITTPtG.....HEFLLQADHFPTISKWHDAIKKAVD  
nkeksalkqnkeVLELAFSILYdPD.....ESLNfVAPNKYEYCIWTDGLSALLG  
.....KNKHMIVLYTrGE.....-SFAIAADTEEVQNEWYQAMLDLQC  
.....-DDSTFTITVdQK.....-TFHFQARDADEREKWIHALEGTIL  
.sLGLLGLKLTPED.....-SFVVLATSPLEKKGKWLRAINQAI  
.....-VFSIVFIDE.....aeRKYLFECDsQEQAeWIDAIKASY  
.....ksSKKNVLELkTrHG.....SEYLIQYDTDSIIQDWQKIILDTIK  
grRKKHELRFtLpGG.....EALVLAVQSKEQAeKWLHVVRDVTG  
.fmSSKHVFAIFntEQ.....rnvykdyRHLELACDTQDDVDSWKASLLRAGV  
.....vyKETGYWNIIvHGR.....kHSYRLYTKLLNEAMRWASAIQVAID  
gslalgGNPHCFEITaTM.....vyyvgentggphIhS PALATGGVGLAVAQSWERAIRQALM  
...NINNSFTVITpFR.....-RLILCAENRKEMEDWISSLKSvQS  
.....-SYHLKAYSEGEcQRWVSALQQAkA  
.....egkGKDSLLQIVCrDG.....RVISICADSADDALAWTMALQDARL  
.....-TAYVEPgeK.....FQLEFYVPP-----K  
.....tKRKHTFRlMTqDF.....CEYLLQAEDRDDMLMWIRVIREKSK  
iIISsTG.....QSWHFEAQSQEDRDawVQAIESQIL  
..essvpqipeEEIDALKVKIsQI.....-----KNEIQRE-----KRVCK  
ysdgsfDPNCCFSIYYgEH.....mESLDLVSGTGEEARTWITGLKYLMA  
.....iGHAHGLQITyCvE.....dhtRNLfVYHkNGQEIVNWFNAIRAVRH  
.....DRRFCLDIEItDR.....pgTVLTVQALSEDDHKFWMHAMGGKEP  
.....DKRFCDIEVvER.....hGIITLQALSESnrRLWLEAMDGKEP  
.....DRRFCEVSpSK.....-SCLLQADSERQQQSWISAVQNSIA

lpagshcngAWQFGITIEpER.....-SFLFTCETDTEQKDWMShFNTLIC  
llpegANPHCFEiATtSL.....vyyvgenlsradggssgygSSMLVSGVGQDVAHMWEMVIQHAlM  
.....egkGKDSLLQIVCrDG.....RVISICADSADDALAWTMALQDARL  
.....-VFSIVFIDE.....aeRKYLFECDSQEQCAEWIDAIKASY  
.....ksSKKHVLELkTrQG.....TELLQSDSDGLVNDWHKALTEAIH  
.....peePGRHLFEILPaGE.....kdkaamshESFLLMANTQSDMDDWVKAIRRVIW  
TG.....-SKCFSCRSAAERDKWMENLRAVH  
KSFdLITpYK.....-TFSFTAETDREKRDWMEALQESIA  
.....gkhGYEHTFELYSeEG.....RVYLFGTDDGSIakNWIRAVTMAVL  
.....tKRQAVAIvFTdDT.....-SRTFTCESELEAEWFKTLsIECL  
.....-RNYGFQIYVsTQ.....eAVHTLSAMTAGIRRNWIQAVMKNVR  
.....ERRFCFEVLSpSK.....-SCMMQADSEKLQAWIKAVQSSIA  
.....KHPFAFRIMRaST.....EVAALEASCSVEMGRWLGVLlAEAG  
.....eKkPNVLKLTaDW.....RVFLFQAQSPeEMESWIRIINSVAA  
.....GNPNGLQITyIKD.....nitRNIFVYHDSSKEIVDFNSIRAAQL  
JviDRRFCFELLSvKQ.....-CCVLQADSEELKSAWMNAVQGCID  
.....ksSKKNVLELkTrTG.....AEYLIQYDTSIIQDWHKvILDtIH  
kpvhssilGQDYCFEVSTsTG.....-SKCFSCRSAAERDKWMENLRAIH  
.....ksSKKHVIELkTrVG.....TELLIQSEIDSVINDWFRALSETIN  
.....-KYNLTSSG-----SFILAYMY  
JvhssilgqdmmlYDLRLQVTTaSG.....-TKCFACRSAAERDKWIENLQRAVK  
...kqtETKHGVRIENISR.....-KLVLKFTSYRHARWWGQAIESFVR  
:LRNGWLIkTpTK.....-SFAVYAATATEKSEWMSHINKCVS  
.....-DSHTFTVNAiSG.....EQYKLrASDAKERQHwVSRLQVCAQ  
kpvhssilGQDFCFEVTTsTG.....-SKCFSCRSAAERDKWMENLRAVH  
.....ERRFCFEVVSPTK.....-SCMLQAeSEKLQAWIQAVQASIA  
...skKIQHKLKVVAgAE.....-TVILGFQSSIQAKEWRKVIEDVSG  
.....tKSQGGlISLTFAR.....AKLLLMSDDQVDINDWYRSCLCTIG  
.evllsiadefPPDRCFTLVFrGR.....rGNLDLVAESTKEAQSWIKGIRKLID  
...fmSNKHTFGIFNtEQ.....rnvykdIRQIELACATQEDVDSWKASFLRAGV  
ldlprlppggRRDCCFAIlLnQD.....KFILLADGPeeCSQWLKLLRKVKE  
..enhEKKDILVLVEkGR.....-TLHLQGTGRtDFSLWYADIQKAAG  
vvhssilGQDFCFEVTTsTG.....-SKCFSCRSAAERDKWMENLRAVH  
.....-DKKCILLRVkGG.....KQFVLQCESDPEFVQWKKELTEAFT  
.....-RNYGFQIHTkDG.....-VFtLCAMTYGIRRNwVQAIKNIR  
.....pgldgGRtFFNAVKEgD-.....-TVIFASDDEQDRILwVQAMyRATG  
.....-DKKCFDLIShNR.....-TYHFLADDECDcVAWISVLtNSKQ  
.....AYQNELNIESvER.....-SFILSANSATERDEWLEAIATAID  
.....AYQNELNIESvER.....-SFILSANSATERDEWLEAIATAID  
DDIYGCDVNLkEQ.....gqlirqDEFLlTFRK-----KKCYRHIF  
.....-ELYKYELFHpQI.....qkksqYIKYLCCDDVRMLHQwVNGIRIAKY  
.....-DRKCFDLIShNR.....-TYHFQAeDEQEFIWISVLtNSKE  
.....tKRKHAlRLTTqDF.....CEYLLQAEDREDMLEWIRVIRDNSK  
.....-DKKCFDLIShNR.....-TYHFQAeDEQEFIWISVLtNSKE  
...ernLDAAGFTLHMkKE.....-DVRMIAPSLAELRWKGYMLsIAK  
:lrkyteetLEGRAFSILFkGR.....qKSLDLIASTEEEAkkWVSGLEKVIS  
.....rpKAeFCFVINAgMR.....-KFYLQANDKQDLVEWVSELNKATK  
:PLCFKVSDqTI.....pkQQHVvQAKNQEERLWLHYLkRLIV  
.....-IQHGICIENfDR.....-KLVIKCSSYRQAQWWSHEIRSLSE  
.....pgldgGRAFFNAVKEgD-.....-TVIFASDDEQDRILwVQAMyRATG  
SNrNG.....KGYTFLISSDYEREewREVIREQQK

....-FFPMFTVCAaNG.....dffklrggaLETYLI--SDPKMLKDLLGALSSNIS  
...kpvhssilGQEYCFEVITaSG.....-TKCFACRSAAERDKWIENLQRAVK  
.phmkekgalkqnkeVLELAFSVLYeSD.....EYLNFIAPDKHEYCVWTDGLNALLG  
savpNIEHCFCLTIEN.....hggrqMERIMKAPSQSDSQRWLAVFPNPDD  
ttrpDQAHCfVILYgTE.....frIKSLSLAATSDEEMVMWVKGLTWLMS  
3WLsMP.....akntkrfgwDKKYVVVSS-----KKILF  
.....-GDVRFELHSqSR.....-TFLFRAENTQERDDWVSCIEKILS  
.....-KYVYFTVVMsEG.....REIDFRCLQD---EGWNAEITLRMV  
.krrdrGLPRAFEIFTdSK.....-TYVLKAQDEKHAEEWLQCINVAVA  
.....--CYSIVMITkLV.....emKCKKYWPDD-----SELY  
.....DTDCLWELIHtKS.....qkegrpeTVFQLCSSTPECKVNIKVMRSILR  
eallgvadefPPDRCFTLVFrGR.....kGNLDLVAESAEEAQAWIQGVRGLME  
.....-FTRVDLIIPgEQ.....-YFYLRAINAAERQKWLVALGTAKA  
rhaegsfDPSCCFITYHgNH.....mESLDLVTNSNSEEARTWVTGLRYLMA  
...rikykaPTDHCfMLKHpQI.....qkesqYIKFMCCDDEWSMNLWVTGIRVAKY  
...rikykaPTDHCfMLKHpQI.....qkesqYIKFMCCDDEWSMNLWVTGIRVAKY  
...cfGSANVMQIISsED.....sgqqETLYLDCKSVNELNHWSALRKACS  
kITSKNSFVIGWpTT.....-NYVVTFSSETKEKWLRLHWHTC  
kITSKNSFVIGWpTT.....-NYVVTFSSETKEKWLRLHWHTC  
nqaasIPeeQCLTIVfkgG.....rKSLDVQCDTTEEAQHWHVHGIRTLQG  
kaPTDYCMVLKMrID.....gppaqparASYPLQLPPLQSLQ-----SRSSY  
..hqrPGSRLNLIINgNG.....dsASHVFIAESPDVLQEWLDSLWQHIIY  
ttvirpvhssilGEKYCFQVINsEN.....-NHCFGCTSAERDRWIEDLRRTAH  
.....-EKKCFDLISHDR.....-TYHFQTEDEAECQVWVSVLQNSKE  
.....--CHFVLTSgGR.....-SYHLKAYSEGEQQRWVSALQQAKA  
.....kKKKNVFILRTtAE.....GDYIFLAKDEEDLKGWVNSINASLK  
.....rpKAeyCFVINAgMR.....-KYFLQANDQQDLVEWVNALNNATK  
:agvgppeshPRENLLVVYLrDG.....TMLSLCANSEDEALAWKLTLMEAKR  
....fmSTKHIFAIFNtEQ.....rnvykdIRQIELACDSQEDMDSWKASFLRAGV  
...-EKRTFDLVThNR.....-TYHFQAEDEQEcmiWVSVLQNSKE  
jKkkKHELKIVHqGA.....DALVLAVQSKEQAEQWLKVMKEVCS  
....racdysKRQNVLKLKtSDW.....RVFLLQAPSEEMMSWIFRINLVAA  
..sTEGRFRLTFpNK.....-RIYLRAPSKGEAEDWVDRITEAVN  
3LCFSVThyKH.....pkQPHTVQARTLEEKKLWAHHIKRLII  
mlfsgkadgnSDSRLLTVVYgND.....lvniSFLNFQAVQDGYCKLWTDDELfKLAT  
mlfsgkadgnSDSRLLTVVYgND.....lvniSFLNFQAVQDGYCKLWTDDELfKLAT  
.....--CNIVLSSgGR.....-TYHLKASTEVEQRWVTALELAKA  
...gapspgalvPVPgVNGLSKdKQ.....tpeggaapNLLTVEEAS-----RAGLS  
.....kKRKHVfKLRLgDG.....KEYLFQAKDEAEMSSWIRAIQSSMS  
1SDSRLLTVVYgND.....lvniSFLNFQAVQDGYCKLWTDDELfKLAT  
.....SAQSAIKIEVkdI.....-SITLSASSCIERDGFVTMNRTLV  
.....FYPNGIRLTsaIP.....gadfkVLINFNAPNIQDRKRFISDLRESIA  
.....LPSSEYQMKIsKT.....rvKMYQLK-----QALLQHMK  
..SGDHSLELQTgSL....vycvfaeqdgpapkltrsklqrrvdisELYQIFSDE-----VLGSGQF  
sfgdLQEFaFQINGvSL.....NPIIVYCSTEEEMNNWFGLLKEQIE  
...hssilGQDFCFEVAYsGG.....-SKCFSCSSAAERDKWMENLKRTVQ  
.....-PKHPFALRIIKG.....gaEVAALEASCSedMGRWLGVLLAETG  
.....-PKHPFALRIIKG.....gaEVAALEASCSedMGRWLGVLLAETG  
kytyssiENRCFSIIFkGR.....rENLDLIASSDDEANCWVNSLEKVIN  
.....-PKYCVQLSFPgG.....-TVLLQAANSYLRDQWFHSIQWKKK  
.....evpDKENTFLLQMeGQ.....VQYVIETRAVQMRawLSDIRNAIC

...GKFVYFTIVtDN.....KEIDFRCSD--EKNCWNAVIAIALV  
.....-QKNLFRLLHmpQK.....-ALLLRTDTQADNLRWISALSRPYP  
.....-DECRFDISVnDS.....-IWYLRAEHPLLRQQWIDTIELHKV  
...tkRKEHKLKISPIGA.....EAVLGLQSKEQAEQWLKVIQEISP  
.....-DGLRFEVWVrQA.....srtRDCLTLQTASHQDRESWTHDIAQLLW  
sdsKLNLKLMMPnSD.....grsEQLVLAEN-----K  
.....--CNFVISNgGT.....QTYHLKASSEVERQRWITALELAKA  
.....-EKKSFDLISHDR.....-TYHFQAEDEPECQIWISVLQNSKE  
...lgpHLDHCFSLTIEN.....hrgstCEHLLKANTESDMHRWIAAFPSINE  
.....DKRFCFDIETsER.....gSPVLLQAISEVNRKQWIEAMDGKEP  
CLSNsLG.....dsflfQVIKLPCTCSQTELENWITGIHSACA  
.....-TEHAYRITitQH.....gdHVVVLEANCADDRDQWVQLLQDECS  
.....-DECRFDISVnDS.....-IWYLRAEHPLLRQQWIDTIELHKA  
dvyradakEIPRIFQILYaNE...geskkeqepleplgdkssyichkghefipTLYHFPTNC-----EACTK  
..IKPNTFMIEGkLI.....NPIIVSCLNKSEFHDWIQYFKNADV  
.dggqMLACVFLKLIEN.....qedreVSYMLKTESVSDKLRWICALTPNRR  
...KDGFCFKLFHpLE.....qsiwavkgpkgeavgsitqplpsSHLIFRAASESDGRCWMDALELALK  
.....KHPFAFRLLRnGQ.....EVAVLEASSSESMGRWLGVLLAETG  
.....eECQNAFALVVrPP.....teqenllFSFQLTAED-TLKTTLWLRTLRQVA  
..lqgisGFIFYLQLCEgQQ.....lkHQILLKSPTESKQRWITAMFSPDP  
.....-GSYCWSITPkDG.....kRVYLLRAANAAEQRLWMTAILETQL  
lyhsnnyTVTNGWKIHntAK.....NKWFVCAKNAEDKQKWLDAILKERE  
klymgldqgdgelrdSEPFCSVLLgHG.....QSFCFSVELGSDLVLWEKAFQRAVF  
.....tKRPHVFRLLQTaDW.....RVFLFEAPTTEQMNSWIGRINLVSA  
...-SGLCFEiWFrRR.....ktqDTYVLQAASREVKESWTRDLERILW  
...kgsppqGGELSFATRTgTR.....lgiEAHLFRAETCKDLSLWTRHIVTGCH  
.....-GLVYFTIVMnDG.....KEVDFRC--QEGTAWNAAEIALALV  
/lrsnglsdqfPEECAFSIIYgDN.....yESLDLVAStADVSTWVMGLRYLVS  
:GDEPIFHISHiDR.....-VYTIRAESINERTAWVQKIKAAASE  
jskvmrllkkklsEQESLFLNspNM.....plrvhnrngKSYMFLISSDYERAEWKEVIREQQK  
rtngisdqiSEDCAFSIIYgEN.....yESLDLVANSADVANIWVTGLRYLIS  
.....empDNMNTFVLKVaGL.....tGGFIFEADNEQQVSSWTTELRECMS  
...DYPHTFQVSGKER.....-TLELQASSKLDKESWIKAFETID  
.ilgLPSESLLLHLtKK.....hnrssSALILAARNELEKETWIKALSSK--  
.....dsEGSAMCEIVHvRS.....efegrpeRTFHICSSPESKDKFLKTVHSILR  
...esdvihanrkDIPCIFRVTAsQL.....sasssqkTCILILADNEQERTKWVCALNELHR  
vgkdaldKLQYFLVVFgHdG.....qKPLELRTEEESDCDEWVEAIQQASY  
.....gLSGRSFEiWFrRR.....rsqDTYILQAETRDIKHAWTTDLEHILW  
lddfnvSVKNAFKLHNrDS.....dEIHIFLAKKPEEKIRWLRAFHEERK  
...rkhygaPGEHVFCIKSsKE.....rfrgqDLKLMCADSEQSRTCWITAFRLFKH  
.....-DPYKFVLLCrGS.....sERLTLQAANVDIKKEWVQSIRELLD  
...-DPNRFALTSrGA.....dgstVRYVLYSSSPNICMAWVSDVSQILE  
...DYPHTFQVSGKER.....-TLELQASSQQDKEDWIKAFQETIE  
.asdvihanhkDVPCIFRVTsSAL.....kssirpVPLLILAESEAEKRKWWGILEGLQS  
...aeTGHYAFEITGgSI.....DRTMVFCSSLQEQQDWLEHLHPYIK  
...aeTGHYAFEITGgSI.....DRTMVFCSSLQEQQDWLEHLHPYIK  
?LSFSVFHyKN.....pkLQHTVQAKSQQDKKMWWLHLKRLIL  
...-ERAMFLICAsSN.....epEMYEIHTASKEDRNTWITHIRQAVE  
.....kKKKQVFKLRLgDG.....SEYLFQCKDEEELQNWTQAIEQAAQ  
cdhkdrrntDPNCTFTIFYgSQ.....fvINTLSLGADSVEDAekWLTGLELLRD  
.....YYPHGVRLTSaIP.....ggerkVLIVFTAPSQQDRTRFVSDLRESIA

.....EHLYSFRIQMdGE.....ELAILEAKSSADMGHWLGILLSQTG  
cseksgqdMEHLDFKIVVePK.....dsqsFTFILVASSRQEKSAWTSDISQCID  
.....-DPCKFALWVgRT.....ptsdNKIVLKASGIENKQDWIKHIREVIQ  
..dvyraetdEIPRIFQILYaNE..gecrketdvesvpqgdkanclphkghefipTLYHFPTNCE-----ACS  
.....-NSLRFEIWFrrR.....tsknQTYILQSSTADIKHAWTCDIARILW  
.....YYAHGIRLTSaMP.....gaerkVLIVFNAPSQQDRTRFTSDLRESIA  
.....-DPCRLVLTsrNI.....dgsIQKFILRASSEIRTSWANDIIQMLE  
rtelgLLKNAFLLRHaEN.....lnVLCVLCCKKSQDKQRWLQAFARERK  
...rskykaPTDYCLALKHpQl.....qkksqYIKYLCCDDVRTLHQWVNGIRIAKY  
.....-DVKKFEIWyNgK.....eevyvqVSHFSKAPTVDVKIAWLTEIRKILN  
:dcrKWSSGFYLTHqQG.....qSGFEFLFKTKELKKKWLDQFEMAIS  
cdkdfnvSVKNALKLCSpGG.....eEVHLLCAKKPEQKQRWLRFTDERE  
knsgqvfgHLDFKIVVEPsDA.....paFTVLLAPSRQEKAAWTSDISQCID  
knsgqvfgHLDFKIVVEPsDA.....paFTVLLAPSRQEKAAWTSDISQCID  
.....NVPHTFTITGkQR.....-SLELQARTAEERDDWIKVILGTIE  
...NVPRTFLVSGkQR.....-SLELQARTEEEKRDWIAIQATI  
.....-DPCKFALTSrTS.....nsskDAFILHSSHPGVRQVWMLQISQILE  
..--PGSFLLIYINE.....fgcavASYCFQANSGAQGRSWIEAIYNAQN  
..asdvihanrkDIPCIFRVTAsQL.....cassnkCSILILADSDQERTKWVGLLKLHR  
...dGTKHAFEISGnMI.....ERIQVICNNQQDLQDWVDHLHRQTK  
.....pKKDFVFCLSNALG.....DAFLFQTSQGTELENWITAIHSACA  
...pEFRHAFELVGrEE.....SGAVFSARSAEKSASWMAALVTLQY  
pslsakeclEKQYYFTVSFnHE.....nqKALELRTEDVKDCDEWVAAISHASY  
.....-DDRSFGLWHeHR.....gmvRKIILQARSILLRLSWLKDLRDLQQ  
rifcseqsdvqgDRKTCFTIFYgSD.....ftIKSLSLNAHSVEDAEKWLGTLELLKQ  
.....YFPHAMTIVSpCS.....gsekkQVLNFCQAQNAEELLKFVEDLKESIA  
.....-DVKKFEIWySgR.....eEVYVIQAPTVEVKIAWLNEIRKILT  
..rkmhnaPTDYQFCIKPsKG.....rtelkELKMLCAEDEQSRTCWMTAFRLLKF  
.....-QRGMFLISHsTP.....pEMYELHAASKDDRNTWMKIIQQTVS  
.....YYPHGITILSpFS.....sekkQVVSFCSQSADELLKFIEDLRESIA  
.....eSHKDAFELSGsMF.....ERLQVICYNKQDLHDWLEHLNRQTK  
..rkhsaPTDFEFCIKPnKV.....rnevkELRMLCAEDEQSRTCWMTAFRFLKY  
eknrKWCHGFYLTHnQG.....qNGFEFFFKTKELKKKWQEQFGMALS  
.....-DSKKFEIWSsSR.....dEVYTIQAASEEVKTIWVTEIRKLLT  
..-ERGLFLISSeSS.....ppEMYELYAASKDDRNTWLRLIQQTIG  
.....-ERGLFLITAgIA.....npEMVEVHASSREERNTWMQIIQDAMH  
..-KKFCFMLHSsQE.....qmkacklnsdgtlvqanhAAYFIAANMAEMDSWVQSIKSNIH  
ldDTDMTFQIVHrAG.....RTFLIKGEEPkPFRFFFEICKCVAl  
....KRVNGFEVQTpSR.....-TYFLCSETEEERAKWIEILINERE  
.....-APLMFQISHkHR.....-TYIVKAKDESSMKQFLTLIARIR  
-KKKYFLLVNeNN.....pqqRIFHLIADSEEEMELWITEITEFFN  
atKRKYCFKVTtIDR.....-KYRICATDSLDRDEWINSIEKLLK  
...kdkKKKYMFTVGTsKR.....-VFYIFAETETDMKQWMESIKRNLd  
....---LIFEIEDtTV.....gtiksvklmptgpvegghSKYLLKAPTIEEANKWVDSIRNNVL  
KKSCLCFKITHnPT.....kRPFYLFsNEERDSYEWIGSVQEIID  
.....wNDCRYFEIQTtSK.....RTYyLFSEDQVVSldWVTNLQKLWS  
RTNCFQIKNqSF.....-IFyCSSQSQSDMESWITALNTAKN  
.....GKPNCFELVSpRI.....nKTFFIQANTPDEMAsWmKAVEKGSE  
rgvdtssipkpaqLPPFTIELYHySR.....RCYYIQCANEEEFKEWIEIF---K  
..sldSLDWCFSIADsRG.....VEYFFNTETSDQMERWIKAIKVARK  
....-KPNcMAVRSITD.....kedREFLIcANSQADLEDWIKHISNCIT

.DRPNTFELIAtTK.....mKIFLLQAKDVEDELDFWMDEIIKETE  
-TSFNISTtSR.....-TYLIIADSQNELSKWTKSILDFHN  
:ynhGNVFGFELTIpGR.....-VFCFYTNTESERIYWIEAITTISS  
.....-NFFVHVEVpGR.....-VYILRAKNDTEINYWIEGIKDAIK  
...eGRTFCFIISTpKR.....-RYLISCDNYQQLLIWIINTRLSSK  
nnnnnnnnNSKYFDLkSR.....-VYHLYSETERERDYWNVNLNLSIL  
NNFVIKTPKR.....-KYLVAHNP---QKWVDSIKSVIL  
kfkPYIHCFQLVHpKH.....-TLLAAESEDMSMKEWVAILTKAKQ  
.....NRRHCFVANPnYI.....senqsiiqqqNQPILRSSS-----DSVN  
.....-SSNKFVVVHsSN.....-RYYFKTNTKQELTQWVKSVKSRIP  
.....snnnPREFCLSVETeNK.....-NWIISTGSKAQQLEWIEAIKHAIE  
:KNLIDMKTPNV.....gnyqlqifsknkRIDSLCASTNEEFQWNSVLQNLVR  
.ERKFSFQIIPkNE.....tffPTFSIQARDEQDCNDWIKAIELSQQ  
.....-KPFGIVILSgIN.....sknimRDYLLMADSKKEQQEWLQSIDVLK  
.....-KPQGFKLMSkTS.....aRVYWLVAAMTNDQKQKWVSVIKQQIT  
.....GYKVSLLHlHpEK.....RTMEMEFKSESEKSSWLTAInRVIN  
rskEVKLEFTPKHmIA.....gattIIHYIKFENEQELKQW-TVLPiVIE  
...DHPHCFQLITpSR.....-YFFSCEDSTVLFQWISLIRLSIK  
.....TRKNCFKILQsKN.....stitmvhkkrMPYYLSTDKEDDCNDWMILLNSIIK  
.....---GFELATpSR.....-VYVFQVFKPSDLTYWTEGLKEFKK  
...DLRHCFKLSTpLS.....-VFILKAKHHVAMKDWVLALNNAKE  
æGYDYCFQISTsKA.....-NYLISAENERDLEDWTEILRSKR  
.....--NYFQLKTSNN.....ETYVFTTPTNDECDRWVTTINNCID  
...-KDNCFLQTAAtLV.....fgngqynngpiVTRYLSTPEEFYFAWIVSLRGVIF  
etGKPFCLQIMTnTS.....-IHlQLDTEPQLEHWYHEINRMQK  
...PIGYCFTLSHpGY.....TPITLQAETEDDRKKWVQKIKDNNR  
...adipskYSKMCFEIVTpAR.....-TFVMLANNVSDMKKWEILESSRR  
KFFNAFQIKleDE.....HELLLFAKTEEIRNQWINALTQFTK  
'FCIQLTPnTT.....tttqppnLSYLFSVDTFEQHREWITAFNNSFR  
'HFIINSkGR.....-SRHFYDLDGQSKL-WVDLlNELNM  
...rsgGRPYCFDIVTqGG.....sfafsahipeidfSDESFTPNPEDEVFQWSNSILSVSA  
.....DNNNCTNSNSnNN.....nnnsDLIHLSAPS-----LSSSTS  
.....DAKFHFHITQgSE.....vekatglnvTKLFRLEEEHIAKKWIDECERVIK  
TEIKICLLlqDS.....gRTHYLYSQIPNQTEAWINALVTQKK  
..nncnSGNNNGLNGgSG.....KGDQVNGNN-----ISLPIG  
mssgskKPDYCFQITLtsN.....KTHLFQATSQEELLEWIQIINSACI  
.kRSPLVFKIQEeNG.....tnkdyKNCLISCESAEEFNQWFQLLPQIKQ  
.....-VPFGFAIIQIRR.....-VWLLQANSVEDRDKWVQTLDPRLK  
KFCISIRNiNT.....nKTIYLCGSDNDDYESWIFILKKALS  
:qqpptkekdiNgsNQDFRFEILHpRK.....kQPIVLQAENEEERDRWVQAIQDAIS  
iSFCNTFEISQpGT.....tgRRFTLVADSYEQKMEWFTDLDELlK  
.....NNPFSFIVSTkDG.....YKTIFSTDDKLSMAKWILAI DGLKT  
ftIQGFSFQLSTpNR.....-IIHLLAKTKEERGSWLSVLRQNLK  
.....GGFECFEIVThER.....-IFCLRASSVGLLKLWVEFLSFHTP  
.....EKENIFEINTsNR.....-IYLFSADSKSEMEDWMRSIYTHSK  
igNRPNSFLIRDsHN.....KAFLFSANTSQEYNKWLENVKRSTG  
ekkdVWPFSIILDpVSK.....HSINLIASTEERNWAWIKAIKFNCF  
:geEWSLRFNIILING.....KEHRMECSTVKQRDAWCQSINAYRE  
.....-QKYSFTLVTsQR.....-LYFLASETEEEMKIWLVDVLSHTT  
.....NDKYTFQVLTtDK.....-TLHFSCVSGSQMLNWTICIQSAQS  
.....dqSNINSFQILCsGG.....VTCTLYCDTKQKKEEWFTTITKTIS

.....dqSNINSFQILCsGG.....VTCTLYCDTKQQKEEWFTTITKTIS  
.....tNKTNSFEVISaFR.....RNILLATDKADDKDKWIKAIASG  
VLKVISqEG.....-TFKFSTDNPAEREHWVKDIKDAID  
...kGRKNCFMLNHsSP.....-PITLESLIKSTQK-----NKSQM  
gnLINNAFQICSnKK.....-SFVVFADSSDAKMQWMIVLIETID  
.....dNQKNAFQIVSsSE.....KSFTVYAETQKEKLNWLNDFKELLV  
...KHKNSFQLIHpIK.....-SFTLIADTEQEKSWMNSFSDAQN  
..DRRYCFELLSpDR.....-SIILAAETFESMQEWVQVLQNTIA  
εTGLYCFQINWsgD.....kseNGMVISTTEA-DKEDWIKELKESIN  
...-KPLSILLNGINS.....dnISISIEVIFQEQA-----KDEVs  
.....-VNNGFIIKSnQW.....-WSFSCSTPQEKTswMETIQKSLT  
ϳRFNnLFQIIStKK.....-TYFLSAPSSEEKHSWMKLLNEVID  
...EDRPIFQISlqNI.....dsqqdNSPNMLSLN-----GIQNAIN  
nnpLWTNCFEILLqSV.....-ELKFFAETPESKVVWLSQLQKVFS  
EYRKGFQIKtKES.....-SIFYMTSSEKEKSTWFQVLSQASL  
..-NDSMIRIIVgSL.....esidvLIYTISLPSKKDKESWLQDLSVELK  
:GFEILVINE.....kKeKIIGLYFSSEAEKKEWLAAIQSLAG  
...gtekqHHLQTFQLVTPeT.....-TWYFRTSSNDEYQEWLSRLSPMSI  
ISVKYALEIVNIKE.....dSNYILCFNNDQDRSKWFKQIKALIQ  
εSIQQSFSILFsGN.....lrKTMDfVcSDIPERRQIVSALYHVvQ  
.....SKPHCFELFAtGG.....adiikacktdsegkvvegkhTVYRMSAATEEDQQEWIKRLTQsIS  
.....-KPFTFIIRGIQW.....ttvIERTFAVESELERQQWTEAIRNVSS  
..geggdpfaPDGYPFQVGYcElsasanshqlengngggsgvgieggqsggravpqYTLyVIANSEKERSEWIRAIRQVC  
.....dkiYRKFAFKCEHqNM.....RTYWLADNSEAMMQWVRALAAASL  
...asksgRPHCTFIVKtKR.....-SYNLQAASDSAARIWIDAITGAQ  
...hSKPHAFKVYHtAK.....-SFYFAAESLDALNQWVDFLRQASL  
..qigakgvDEKGFDFLKTsKR.....-IYNFYAINANLAQEWIEKLQACLQ  
.....--ASTFEIDTgKK.....-VYYLTADSHATMDDWIRVLQNVQR  
YLAAEtEADMRDwVNCICQVCH  
JHdPR.....saRDMLLLAATPEDQSLWVARLLKRIQ  
.....vGKPFaFKVDaAgEG.....IPMYVAADSDEMANRWLQLLRQAAS  
..sfKMqNCFKIVHnDR.....-SLIVQTTNCVEEREWFdLLHKICL  
prpECNYCFELRLpNL.....syfvgqdpqvgakeeQAVRLPPPDSIAKSWETSIRQAFM  
.....PRGSKSIITNsAL.....-TSSLMANGQRAQN---TLSDGIG  
.....PRDICARLNTmLL.....ecerpaletdqesliivpngrttfVRHLLSADTKEEREWCAYLNKALT  
..-DNYCFEIAFnGN.....RTYILAAENQDSMETWMKALTCAGY  
FYIVSIDS.....KQWHFEAANSEERDEWVAAVEQEIF  
.....tGHPNSIAITApER.....-VTFVKGTSSEESQWWLNILAAFPK  
...KHRFVIVLSSrDG.....-GFGIVLENENDLRKWLDKLLVLQR  
...-KNSFFLIKMKTS.....QMLELRAPSSSECKTWFKHFSdVAA  
...qsvIGRRHCFQVRGgPR.....GERYYSCGSRQERDLWIYSLRKSIA  
.....etvdSRQHCFLLQsGH.....EPryLSVETRQELNSWNAIVTSVI  
iddcqrFESSKCFVILHgNH.....fkIKSFSVVALSEIEADNWVRGLRYMVK  
.....-EDNTFTITVdHK.....-TFHFQARHNEEREQWVRRLEDtIR  
...lwERPycFQIVeRAL.....pclaTVTYLCAPSQESYVEWINSLKAQCD  
.....asGKKNSFEIVPpET.....kIRHYFFCTESEMDKKRWISALEYSID  
εsdvIhaakkDVPCIFIKITaLI.....dggIsLNTLMLADNESEKSKWVIALGELHR  
..arNIPKAfEIFTaDQ.....-TLILKPKDGKNAEEWVQCLSIVVA  
.....-GRFCFELRMtTG.....hKSFTLAAENEQDFKDWLSKISSVLA  
.....DRLNTFVLKAdNN.....MEYVIEAESAEEMRSWLATIRYCMR  
3VKNAINIITpDG.....-SKIYQSITAAGKTEWIEKLEEAfR

.....ssIngQQTTFVCVRCgTA.....rgvLVYWLRSETHRDMAAWARSLVQGS  
..fmsmSRRVTFALFSpDG.....rnvykdyKQLELSCETVEDVESWKASFLRAGV  
dviradakEIPRIFQLLYaGErpedeqsldvsvlhgnceerpgtivhkghefVHITYHMPTA-----CEVCP  
.qTYRNGWYIRTtTK.....-SFVVAATSTEKQEWMAHINKCVE  
..--PGNFKLTCqSD.....-GIIFGSGDVQLSRTWVGFIRDAID  
.....NYPFCIQLSQkVD.....gkLITFNARNEHDRCKFAEDLKESIS  
.....SANLMFGIDLnGG.....ryffnavregDSISFACDDENECSLWVMAMYRATG  
.....ERPHCFEITLkGE.....-VLQMAAPDEYVASEWLQALLQSAS  
.....-DSRTFAIACaSG.....DTVKLRANDARARQEWVDGLRAVVE  
.....--CTFVISNgGT.....QTFHIKAGTEVERQSWVTALELAKA  
.....-KRFCFDLTFkEK.....pgVVYTFQALSEKDHRYSWISAMDGTEP  
..egkRRDICFQITtdDP.....nKKFVYQANNEVDAKEWIHAIEAAIR  
..dmDShFLWELIHRS.....qlqrseKVYVLSNSTADFRNAFLKTIRQIIR  
FKIFFvHT.....PNRTYYLDDPGYAIHWSEAIENMRK  
.....KDGFCFKLFHpLE.....qsiwaprgpdketigavvqplptAYLIFRAPSQAAGKCWMDALELSLR  
.....qtGMRKGLQVLTnNR.....-HIVLKCWTRRKCKEWMQYLKNTAN  
.....-DKRGFDLISyNR.....-PYHFQAEDEGDQKAWMAVLVNCKE  
.....tKKKYVFRLLKpDG.....SEFLFEAPSLDILNDWVRKISFHAS  
..-DELRFDVVnNL.....NNWCLRAETSEDRMHVVDVLQLYKA  
rkkwksptDYTFGfKAVGdSS.....lgkscrSLKMLCAEDLPTLDRWLTAIRVCKY  
.....DRRFCFEVISpTK.....-SHILQADSADMLSLWISALQHSIG  
.....relcARARSFLLQGrNS.....dcesGRVFFAADTQAEELSEWLIHLNEAIA  
.....SKQHAFQLTTwDK.....QRLVLASLSPSSRNSWLAVLRSAG  
.....KHKNTFELChRTL.....gTVYRFRTDSPQMTHLWSNAICKLAT  
.....davQKEFVFKLSfKNH.....-VYFFRAESAHTYNRWLEVLIRSTTQ  
-HNTFSIFGgQC.....-AITVSAGTTAEKTLWLAELSKAAA  
.....rdSEGyVFDLDFkDS.....PSEFTRSSAERLAWVQCIEHASS  
..rtigrDTRFKYQLLLaRK.....sgkTAFtLYLKSEHERDKWRKALTEAME  
.....-SYSAIGLLLgRE.....GRVLLRCDD--GLEDWFELLEECTM  
.....-DETKFAVWTgRS.....pmlsdCRIVLKATSLETQIWWKKLREVMQ  
rqivtlgppqdtLEEKTVTVCHgSD.....fvmTFVNFCTRRDIAQLWTDGLIKLAY  
.....tKKQHVFRLQTaDQ.....AEYLFQTSDSKELQSWVETINyVCA  
.....dALKNAFEISSpLI.....DRIVAVCQGPNEANKWVPELLNANNP  
<dlkdqAGKNLILMTLIEN.....cdrktVELVLSCPSVSDQQRWLQAMRPPEA  
.....tKKKHVLRVKLaNG.....ALFLLQAHDDEMSQWVTSLKAQSD  
hKNENCIQIRInDG.....trdGRIILTNSDEIGLKEWSSSLRSAHK  
>EPTSfYVIPfDE.....prHQIKLTARNRDQKRIWTQHIGVML  
.....--CRFQIRStDP.....kipeMTIICQAASQENYAGWRDMLNKILQ  
.....pKRDIYFCLSTaFG.....DAYLFQAPCQVELENWVNSIHSACA  
peLDKRSLTICSnTD.....yiniTYHHVICPDAATAKIWLDGIRKITH  
.....-SATKFEIWFrKR.....kpdDTWMLQCMSEDIKNAWTEEISKLLW  
..sPRAFGLLLRGdKE.....KLYTFTISDETDKSVYVKKLCNqIA  
...kmfghTIKNSLRIYSeSR.....dKWYDFsFRSANRKHrFLSTLALERQ  
.....-DAKRFEVWLkGR.....qEVYTLQASTIGVKEMWVAEIKRVLF  
.....dDLKNSFELAPrMQ.....PPIVLTAKNAQHkHDWMADLLMVIT  
...RKPNCfELYnpSH.....kgqvikackteadgrvvegnhVVYRISAPSPeeKEEWMKSIKASIS  
...KKPNCfELYIpDN.....kdqvikackteadgrvvegnhTVYRISAPTPEEKEEWIKCIKAASIS  
...RKPNCfELYIpNN.....kgqlikackteadgrvvegnhMVYRISAPTQEEKDEWIKSIQAASIS  
...KKPFCLELYnpSC.....rgqkikacktdgdrvvegnhESYRISATSAEERDQWIESIRASIT  
.....-RPNTFIIRCIQW.....ttvIERTFHVETPEEREETTAIQTVAD  
.....-KPNTFIIRCIQW.....ttvIERTFHVDTPeEREETTAIQAVAD



.....-RPNTFVIRCIQW.....ttvIERTFHVDSPPEREEWMRAIQMVAN  
...cafksPNPRLTFCVKTyER.....-LFYMVAPSPEAMRIWMDVIVTAAD  
nankspNPLLTFSVKThDR.....-IYYMVAPSPEAMRIWMDVIVTGAE  
..sfNKKNMFQVIHtEK.....-PLYVQANNCVEANEWIDVLCRVSR  
ffrftmvtespNPALTFCVKTThDR.....-LYYMVAPSAEAMRIWMDVIVTGAE  
vipcQNKYPFQVVHdAN.....-TLYIFAPSPQSRDLWVKLKEEIK  
..sfKMKNMFQVIQpER.....-ALYIQANNCVEAKDWIDILTKVSQ  
.....nkkefENSYIFDINTiDR.....-IFYLVADSEEEEMNKWVRCICDICG  
eessemegisiieRFPYPFQVVYdEG.....-PLYVFSPTTEELRKRWIHQKLVIR  
.....nkkelQDSFVFDIKTsER.....-TFYLVATEEDMNKWWQSICQICG  
.....sfvrkefQNNFVIVKtSR.....-TFYLVAKTEQEMQVWVHSISQVCN  
....-SSKCIDLDTeEH.....-IYHLKVKSEEVFDEWVSKLRHHRM  
pcHYKYPFQVVHdNY.....-LLYVFAPDRESRQRWVLALKEETR  
.....nfnkveiQKGYMFDIKTsER.....-TFYLVATREDMNEWVQSICQICG  
...dimMRDNLFEIVTtSR.....-TFYVQADSPEEMHSHWIKAVSGAIV  
...ttsNNVFPFKIiHiSK.....khRTWFFSASSEERKSWMALLRREIG  
.....-KARRIDLDTeEH.....-IYHLKVKSQDWFDAWVSKLRHHRL  
ysqERVNCFCLVFPFR.....-TFYLCAGTGVAEDEWIKILRWKLV  
ysqERVNCFCLVFPFR.....-TFYLCAGTGVAEDEWIKILRWKLV  
..yeNRPLLIKLTqTS.....TEYFLEACSREERDAWAFEITGAIH  
gdIIMRDNLFEITsSR.....-TFYVQADSPEDMHSWIKEIGAAVQ  
.....-AQRIDLDTeDN.....-IYHLKIKSQDLFQSWVAQLRAHRL  
...gvpTgkgnVQGNLFKVIKtDD.....THYYIQASSKAERAEWIEAIKKL-T  
.eeqtpvERQYPFQIVYkDG.....-LLYVYASNEESRSQWLKALQKEIR  
...--KTFVHTpNR.....-TYLLMDPSG-NAHKWCRKIQEVWR  
.....dGKRCMFCVKTaNR.....-TYEMSASDTRQRQEWTAIQMAIR  
.lfGRPNCQIVVqHF.....seehYIFYFAGETPEQAEDWMKGLQAFCN  
.....-KENGIDIIMaDR.....-TFHLIAESPEDASQWFSVLSQVHA  
.gekmgSVQKMFKCHPdeV.....msirttnREYFLIGHDREKIKDWVFSMSSFRQ  
.....-----TVS  
...fgKRMFVFKITtKQ.....QDFFFQAAFLERDAWVRDINKAIK  
.....RKKYAFKACHpKI.....KSFYFAAEHLDDMNRLNINMLTA  
sngRksEEENLFEITaDE.....VHYFLQAATPKERTEWIKAIQMASR  
.....-KQTVQLTTeKH.....-TYLLTADSPNILEEWIKVLQNVLR  
smgapkhtSDKAFFDLKtSKR.....-VYNFCAQDQSAQQWMDKIQCIS  
...dniSRKHTFKAeHaGV.....RTYFFSAESPEEQEAWIQAMGEAAR  
.....-HQHCLAFSSsGP.....qsQTYIICFDTFTEYLRWLRQVSKVAS  
.....-DNKFEVVTtQR.....-TFVFRVEKEEERNDWISILLNALK  
.....RYRHLIALFTqDE.....-YFAMVAENESEQESWYLLLSRLIL  
...driSRKYSFKAVHtGM.....raliynsstagsqaeqsgmRTYYFSADTQEDMNAWVRAMNQAAQ  
.....NWKKRWFVLRqSK.....-LMYFENDSE-----EKLKGTVE  
...nSESKVFQLLHhNM.....LFYVFKAEADAHSAQKWIEAFQEGTI  
.tmgapktvDEKAFFDVKTtRR.....-VYNFCAQDVPSAQQWVDRIQSCLS  
.....KHKYLIALYtKDE.....-YFAVAEAENEQEQEGWYRALDVLVS  
...nrefcARRNTFELITvRP.....qreddretlvscrdtlcvTKNWLSADTKEERDLWMQKLNQVLV  
...eenPGKFLFEVVPgGD.....rdmrtanhesYLLMASTQNDMEDWVKSIRRVIW  
.....-EEFAFAVRFaGT.....raRTYVLAAESQDAMEGWVKALSRSASF  
.....-SQTFQLISeKK.....-TYLLTADSPSLLEEWIRVLQSLLK  
.....-RRHAFELKMidK.....YSHYLAETEEMEEWLITLKKIIQ  
.....-WPSLATALactPI.....ssksdglskdmdtglgdsICFSPSIS-----TTIP  
...lpkgirgnRWKAGLTIvTpER.....-RFVLTCPSEKEQEQEWLESRLRGVLS

.dhiNRKYAFKAAHpNM.....RTYYFCTDTGKEMELWMKAM LDAAL  
.....-DSCLFFIKCfDD.....tiHGFRVPKNSLQSR EDWLEAIEEHSA  
yeaggrlISSHCTLVHPtEH.....SPTYLLIGTKHEKDTWLYHLTVAAG  
.....-EEGIFEIKtSR.....-VITLKAATKQAMLYWLQQLQMK-R  
.....KKKYVFQLThdVY.....KPFIFAADTLTDL SMWVRHLITCIS  
YdVT.....saRDMLLLACSQDEQKKWVTHLVKKIP  
yeasgrsIISTHYTIVIHpkDQ.....GPTYLLIGSKHEKDTWLYHLTVAAG  
YdVT.....saRDMLLLACSQDEQKKWVTHLVKKIP  
.....dGKKCLFLVKCfDK.....-TFEISASDKKKKQEWIQA IHSTIH  
gfppstqghHWPHGITIVTpDR.....-KFLFACETESDQREWVA AFQKAVD  
.....KKKHAFKISHpQI.....KTFYFAAENVQEMNVWLNKLGSAVI  
gssEVGPIFHLyHkKT.....LFYSFKAEDTNSAQRWIEAMEDASV  
.....SMPYAMKISHqDF.....hGNILLAAESEFEQTQWLEMLQESGK  
=MIVSaTG.....Q TWHFEATTYEERDAWVQAIQSQIL  
dtqppd gkSKDCMLQIVCrDG.....KTISLCAESTDDCLAWKFTLQDSRT  
.....DKRFCFDIEVvER.....hGIITLQAFSEANRKLWLEAMDGKEP  
.....ksSRKNVLELRSrDG.....SEYLIQH DSEAIISTWHKAI AQGIQ  
.....KNKHLVALYTrDE.....-HFAIADSEAEQDSWYQALLQLHN  
ellvgnigrLEQRMITVVYgPD.....lvniSHLNLVAFQEEVAK EW TNEVFLAT  
.....QTCHF KATTYEERDAWVQAIQSQIL  
.....ifKETGYWNVTVyGR.....kHCYRLYTKLLNEATRWSSAIQNVTD  
vlqanlylgldfd fedQRPYCF SIVAgHG.....KSHVF NVELGSELAMWEKSFQRATF  
.....asspRDTSAFFLEtkE-.....-RLYLLAAPAAERGDWVQAICLLAF  
ssksngl skdmdtgIGDSICFSPSIsST.....TSPKLNPPP-----SP  
glrrfggafAPARCLTIAfKGR.....rKNLDLAAPTAE EAQRWVRGLTKLRA  
.....dlldRRKQCFTVQSeSG.....EDLYFSVELESDLAQWERA FQTATF  
.....-DNKFQVITgQR.....-VFVFRTESEAQRDMWCSTLQ SCLK  
.....rKETGLWSVTVsGR.....kHSVRLCSPRQAEAEERWGV ALREVIA  
=FIIVSITG.....Q TWHFEATTYEERDAWVQAIESQIL  
.....akKRIHNFSVINpVP.....gqaITQIFAVDNREDLQKWMEAFWQHFF  
...peeAGKFVFEIIPaSW.....dqnrmgqDSYVLMASQAEMEEWVKFLRRVAG  
MIVSaTG.....Q TWHFEATTYEERDAWVQAIQSQIL  
.....-RHIYFTLVTeGG.....GEIDFRCPLEDP--G WNAQITLGLV  
GEPHCfQVTWtGG.....-SRCFSCRSAAERDRWIEDLRRQFQ  
...NLCHSFCVITpQR.....-KITLAAPNRKDMEEWINI IKTIQQ  
.....-DPRVFQLQqSGQ.....-LYTFKAETEELKGRWVKAMERAAS  
NVNNSFTVITpCR.....-KLILCADNRKEMEDWIAALKTVQN  
.....-RRFAFELKMqDK.....SSYLLAADSEVEMEEWITILNKILQ  
tsacapisspktngLSKDMSSLHIsPN.....-SGNVT SAGSQMA--SGISLV SF  
-RSFDLLTpHR.....-CFSFTAESGGARQSWAAALQEAVT  
...dthGFEHTFEVYTeGE.....RLYLFGLESAEQAH EWVKCIAKAFV  
...-DQKFEVITnNR.....-TFAFRAESDVERKEWMQALQQAMA  
.....ERRFCFEVVSptK.....-SCMLQADSEKLRQAWIKAVQTSIA  
...dgiHKDYVFKLQFkSH.....-VYFFRAESKYTFERWMEVIQGASS  
.....tGQKFSLCILTpEK.....-EHFIRAETKEIVSGWLEMLMVYPR  
...nttDRPHAFQVILsDR.....PCLELSAESEAEMA EW MQHL CQAVS  
.....rkdgKKDCCFEISApDK.....RIYQFTAASPKDAEEWVQQLKFVLQ  
.....-DNTRMELIIPGE.....QH FYMKAVNAAERQRWLVALGSSKA  
.....-DDSTFTITVdQK.....-TFHFQARDADEREKWIHALEETIL  
...fmSSKHIFALFNtEQ.....rnvykdyRFLELACDSQEDVDSWKASLLRAGV  
.....IKRKH R FILLRsPG.....nkvsDIKFQAPTGEEKESWIKALNEG IN

.....-APHMLVVYSaNG.....EMFKLRAADAKEKQFWVTQLRACAK  
...iGHPHGLQITYrRD.....ghtRNLfVYHESGKEIVDFNAlRAARL  
.....qalGRPFtLSISnqYG.....ddeVtHtLQTESREALQSWMEALWQLFF  
vlgfggpdarIEEKLMtVVSGpDP.....vntVFLNfMAVQDDtAKVWSEELFKLAM  
.....aprGRRFTFTAeHpgM.....RTYVLAADtLEDLRGWLrALGRASr  
...NANNSFTIITpFR.....-RLMLCAENrKEMEDWISSLKSvQT  
..pdsERRFCFEVVSStSK.....-SCLLQADSERLLQLWWSAVQSSIA  
vppgTNPHCfEIVTaNA.....-TYFVSGQGAEAArGWETAIRQALM  
.....EKRFCDVEAvDR.....pGVITMQALSEEDRRLWMEAMDGREP  
tpatapgtsPRANGLSVERsNT.....qlgggtgaphsaSSASLHSERP-----LSSSA  
.....sSRKNVFQITtVSG.....NEFLlQSDIDfIILDWFHAIKNAID  
.....iGHPHGLQVtYIKD.....nstRNIFIYHEDGKEIVDFNAlRAARf  
nisqgSNPHCFEITdTM.....vyfvgenngdssHNPVLAATGVDVAQSWEKAIrQALM  
.....DRRYCFQITsfdG.....kKSSILQAESKkDHEEWICTINNISK  
...ksrskKNHskFTLAHsKQ.....pgntaPNLIFLAVSPEEKESWINALNSAIT  
.....vPEEFaFAICFdAP.....gvRPHLLAAEGPAAQEAWVKVLSRASf  
.....erIDSGHVWKLQWaKQ.....-SWYLSASSAElQQWLETLSTAaH  
.....ERRFCFEVLSpTK.....-SCMLQADSEKLRQAWVQAVQASIA  
.....pKTPFCFVINAIStQ.....-RYFLQANDQKDMKDWVEALNqASK  
qrypDgsfDPNCCFSIYHgSH.....rESDLVStSSEVARTWVTGLRYLMA  
LRNGWLIKtTK.....-SFAVYAATATEKSEWMNHINKCVT  
-DRRSFDLttPYR.....-IFSFSADSELEKEQWLEAMQGAIA  
..KHPLtFRLLRnGQ.....EVAVLEASSSEDmGRWIGILLAEtG  
.....tKRKNVFRlTtsDC.....-ECLFQAEDRDDMLAWIKtIQESSN  
.....ETKHSFALYtPER.....trqrWPVRLAAATEQDMNDWLALLSLSCC  
.....-DSHTFTVNAaSG.....EQYKLrATDAKERQHWVSRLQICTQ  
.....sKRPHVfYLRtADW.....RVFLFQAPSLEQMqSWITRINVVAA  
...dGCDCSFQVIFpQD.....-VLRLRAETRQRAQEWMELKIAAN  
.....afQLPHVMQVvtqDG.....tgalHTTYLQCKNVNELNqWLSALRKASA  
amkEksalkqnkeVLELAFSILYdPD.....ETLNFIAPNKYEYCIWIDGLSALLG  
.....pglegGRAFFNAVKEgD-.....-TVIFASDDEQDRILWVQAMyRATG  
senDLEGRIVCVCsGT.....dlvnISfYMVAENPEVTKQWVEGLRSIIH  
.....RHPFAFRILRnRQ.....EVAILEASCEdMGRWLGllLVEMG  
.....psLATSACAPISsSK.....snglSkdmEALHMSANSDIGLg-----DSICf  
ivgaselantakaDVPYILKMESHpH.....ttcwpgrTLyLLAPSFpDKQRWVTALESVVA  
.....silGQEFcFEVtTsSG.....-TKCFACRSAAERDKWIENLQRAVK  
.....-DNTRMDLIIPGE.....QYfYLKARSVAERQRWLVALGSAKA  
.....eKKNVfKlKtADW.....RVLLFQtQSPEEMQGWINKINCVAa  
=LIVSsTG.....QTWHFEAASFEERDAWVQAIESQIL  
.....-DPLGFKVSDITl.....pkHRHLLQAKNQEERLWIHCLQRlFF  
pafRpDQSHCFVILYgME.....friKtLSLQATSEDEVNMWIKGLTWLME  
.....DRRYCFQITtpNG.....kSGIILQAESRKENEWICAINNISr  
..SRHKRHELRFtQG.....atEVLVLALQSREQAEEWLKVIREVSK  
AKNRWMIKtAKK.....-SFVvSAASATERQEwISHIEECVr  
...GKYVYFTIVtIDH.....KEIDFRcAGE---SCWNAAlALAl  
.....tKRQAVAIIFTdDS.....-ARTFTCDSELEAEEWYKtLSVECL  
...--PGTFSISfIED.....peRKYHFECSSeEQCQEWMEALRRASy  
.....fmSSKHIFALFNtEQ.....rnvykdyRQLELACETQEEVDSWKASFLRAGV  
.hdvqppegrSRDGLLTVNLrEG.....GRLHLCAETKDDALAWKTALLEANS  
.....-----SEaSP.....-QVHPFDHEEDMKMKISALKSEIQ  
.....pglqgGCMFFNAVKEgD-.....-TVIFASDDEQDRILWVQAMyRATG

kpvhssilGQDYCFEVTTSsG.....-SKCFSCRSAAERDKWMENLRRAVH  
.....DRRFCFDIEAaDR.....pgVSLTMQAFSEEEERKQWLEALGGKEA  
...eniQKDYVFKLHFkSH.....-VYFRAESEYTFERWMEVIRSATS  
.....EHPDLFLLTDsEK.....gNSYKFQAGNRMNAMLWFKHLSAACQ  
fyIntGPIFIFEIYLpSE.....RVFLFGAETSQAQRKWTEIAIAKHfV  
.....AYQNELKIESvER.....-SFILSASSATERDEWLEAISRAIE  
.....iDKRFCFDIETnER.....pGTITLQALSEANRRLWMEAMDGKEP  
...lhgPHKNLFRFLrQN.....tqgaqAEFLFRtETQSEKLWISALAMPRE  
adfhssghIVVNGWKIHNTAK.....NKWFVCAKTPEEKHEWFEAILKERE  
..krrdrSLPRAFEIFTdNK.....-TYVFKAKDEKNAAEWLQCINVAVA  
.....-RNYGFQIHTkDA.....-VYTLSAMTSGIRRNWIEALRKTvr  
.....aDLPHSFKLTQsKS.....-VHSFAADSEELKQKWLKVILLAVT  
SLCFTVTHyKH.....skQQYSIQAKTVEEKRNWTHHIKRLIL  
skKKKHELKITQqGT.....DPLVLAVQSKEQAEQWLKVIKEAYS  
.....KVPYALKIETsES.....-CLMLSASSCAERDEWYGCLSRALP  
.....-RNYGFQIHTKEG.....-EFTLSAMTSGIRRNWIQTIMKHVH  
...fmSNKHVFAIFNtEQ.....rnvykDIRQIELACDSQEDVDSWKASFLRAGV  
.....-PPRAISAFGpSA.....-SINGLVKD-----MSTVQMGEg  
..phmkekqalkqnkeVLELAFSILYdSN.....CQLNFIAPDKHEYCIWTDGLNALLG  
....dKKCILFRIKGgK-.....-QFVLQCESDPEFVQWKELNETFK  
.....erpDRRHVFKITQsHL.....-SWYFSPETEELQRRWMAVLGRAGR  
.....ksSKKNVFELKTrQG.....TELLIQSDNDTVINDWFKVLSSTIN  
vSFLlKTITV.....vsgpDMVDLTFHNFVSYK-----ENVGK  
.....TKKHAVAIIHfHDE.....TSKTFACESELEAEWCKHLCMECL  
.....sSRRNVLHIRTiPG.....HEFLLQSDHETELRAWHRALRTVIE  
...lqgipGHVFLQLLHgQH.....mkHQFLLRARTESEKQRWISALCPSSP  
.-VKQSFEITpYR.....-SFSFTAETEKEKQDWIEAVQSSIA  
asdvihqsrDLPRIFRVTTsQL.....avppttCTVLLLAESEGERERWLQVLGELQR  
qaeqnfDPSCCFTIYHgNH.....mESLDLITSNPeeARTWITGLKYLMA  
...-EKKCFDLVThNR.....-TYHFQAEDeHECEAWVSVLQNSKD  
.....rpKAefCFVMNAgMR.....-KYFLQANDQQDLVEWVNLNKAIK  
.....crspsIGSDLTFATRtGSR.....qgiEMHLFRVETHRDLSWTRILVQGCH  
.....gtENNSIWELIHtKS.....eiegrpeTIFQLCCSDSESKTNIVKVIRSILR  
.....eGLVHTLAIVCISQ.....-AIMLGFDSHEAMCAWDARIRYALG  
.....rgrhGRKHTFSLRLtSG.....AEILFAAPSEEQAESWWRALGSTAA  
...reQQKKCFRSFSITS.....VELQMLTNSC-----VKLQTVHS  
....pedPGKHLFEISpGGA.....gerekvpanpEALLMASSQRDMEDWVQAIRRViW  
.....--CGILLTSgAR.....-SYHLKASSEVDRQQWITALELAKA  
...aGGVNGLKITTpEE.....-QFTLISSTPQEKTKWLRAISQAVD  
hsngyTVTNGWKIHNTAK.....NKWFVCAKTAEeKQKWLDAIIRERE  
.....--CNFIISNgGA.....QTYHLKASSEVERQRWVTALELAKA  
...plhssilGQDFCFEVTYISG.....-SKCFSCNSASERDKWMENLRRTVQ  
glekfardvPEDRCFSIVFkDQ.....rNTLDLIAPSPADAQHWWLGLHKIiH  
.....-DECRFDISVnDS.....-VWYLRAQDPDHRQQWIDAIEQHKT  
...KQIRSFliEGpLI.....NTIRVVCASyEDYGHwLLCLRAVTH  
.....EHPDIFQLNNpDK.....gNVYKFQTSRfHAILWHKHLDDACK  
.gqTLANVFILRIEN.....addreATYMLKASSQSEMKRWMTSLAPNRR  
sfGGSHVMQVIYtDD.....agrpQTAYLQCKCVNELNQWLSALRKVSI  
EFIPTLYHfPA.....ncdacakpLWHVFKPPPALecQ-----RRHVk  
.....-DPCKFALTSrTG.....dvvETFiLHSSSPSVRQTWiHEINQILE  
.....empDNLYTFVLKvKDR.....TDIIFEVGDEQQLNSWMAELSECTG

.....sKKS NVLKLKTaDW.....RVFLFQAPSKEEMLSWILRINLVAA  
.....YYPNGIRLTSsVP.....gadi kVLINFNAPNPQDRKKFTDDLRESIA  
ngisdriSEDCAFSVIYgEN.....yESLDLVANSADVANIWVTGLRYLIS  
...-EKKCFDLIShDR.....-TYHFQAEDEQECQIWM SVLQNSKE  
.....tEARHGVRIDTsHR.....-SLILKCSSYRQARWWAQEITELAQ  
lipngANPHCFEITTaNV.....vyyvgen vnpsspspnNSVLTSGVGADVARMWEIAIQHALM  
.....kKKKHVFKLQTqDG.....SEFL LQAKDEEEMNGWLEAVASSVA  
.....etKRRHVFRLLTtADf.....CEYL FQAEDRDDMLGWIRAIRENSR  
mkykaPTDYCFVLKHpQl.....qkesqYIKYLCCDDTRTLNQQWVMGIRIAKY  
...-DKKSFDLIShNR.....-TYHFQAEDEQDYVAWISVLTNSKE  
..KDGFCFKLFHpLE.....qsiwavkgpkgeavgsitqplpsSYLIIRATSESDGRCWMDALELALK  
knsstmlysrqsSASHLFTLTVISN.....hane kVEMLLGAETQSERARWITALGH SRG  
gggnrSSVPHPFQVTLIRN.....segrqEQLLLSSDSASDRARWIVAL THSER  
.....daEANA VCEIVHvKS.....esegrpeRVFHLCCSSPESRKDFLKAVHSILR  
sdvihar kDIPCIFRVTAsQL.....sasnnkCSILMLADTENEKNKWVGVLSELHK  
nfGSSHVMQVIYtDD.....agrpQTAYLQCKCVNELNQWLSVLRK VSI  
..KDGFCFKLFHpLD.....qsvwavkgpkgesvgsitqplpsSYLIFRAASESDGRCWLDAL ELALR  
...vrKKEHKLKITPmNA.....DVIVLGLQSKDQAEQWLRVIQEVSG  
.....rrdsKKESC FELTSqDR.....RSYEFTATSPAEARDWVDQISFLLK  
...mkykaPTDYCLVLKHpQl.....qkksqYIKYLCCDDVRTLHQWVNGIRIAKY  
..ellrslaeeIPLEQGFTIVFhGR.....rSNL DLMANSVEEAQIWMRGLQLLVD  
.....kKKKHVFKLRLsNG.....SEWLFHGKDEEEMLSWLQGVSTAIN  
.....YYQFGIKLLSaVP.....ggerkVLIIFNAPSLQDRLRFTSDLRESIA  
rVKNAFILQGpKY.....-KWICATEIEDDKFLWLSVLRNAIK  
.....tKKPHVFQLRTaDW.....RLYLFQAPTAKEMSSWIARINLAAA  
.....empEKDNTFVLKVeNG.....AEYILETIDSLQKHSWVADIQGCVD  
sGDEPIFHISHiDR.....-VYTLRAESINERTAWVQKIKAASE  
vpyDAELSFALRTgTR.....hgvdTHLFSVESPELAAWTRQLVDGCH  
tNrNG.....KSYL FLLSSDYERSEWREAIQKLQK  
lasdvihatrrDIPCIFRVTAsLL.....gapsktSSLLILTENENEKRKWVGILEGLQS  
.....-SGLCFELWFrRR.....farEAYTLQATSPEIKLKWTS SIAQLLW  
...--DGRFELVFsGK.....-KLALRASSQDEAEDWLD R VREALQ  
.....sggPCGGLLSLSFpHE.....-KLLLMSTDQEELSRWYHSLTWAIS  
rpniplvpdEELDALKIKIsQl.....-----KNDIQREKR  
.....empDRENTFVVKVeGP.....SEYIMETVDAQHV KAWVSDIQECLS  
...--DGRFELVFsGK.....-KLALRASSQDEAEDWLDLVREALQ  
.....pPMKDMFKLLMfPE.....-SRIFQAENAKIKREWLEVLEDTKR  
.....REHAFQITGpLP.....APLLVLCPSRAELDRWLYHLEKQTA  
.....EFP HSFLVSGkQR.....-TLELQARSQEEMISWMQAFQAAID  
.....tETKYGIRIDNISR.....-TLILKCN SYRHARWWGGAIEEFIQ  
gladqiCEDCAFSILHgEN.....yESLDLVANSADVANIWV SGLRYLVS  
.....eDCHNAFALLVrPP.....teqanVLLSFQMTSDLPKENWLKMLCRHVA  
.....KERKCLLLKlrGG.....KQFILQCDSDP ELVQWKKELRDAYR  
.....-DDRAFEVWQeRE.....dsvRKYLLQARTAIKSSWVKEICGIQQ  
.....kKKKHVFKLRLnDG.....NEYL FQAKDDEEMNTW IQAISSAIS  
sSDEPVFHISHiDR.....-VYTLRTDNINERTAWVQKIKAASE  
.....-SHRKFEIASrNG.....IEKYILQAASKEIRDCWFSEISKLLM  
...kgspqaGVDLSFATRtGTR.....qgiETHLFRAETSRDL SHWTRSIVQGCH  
..eGNDCTFEITGnTV.....ERIVVHCNNNQDFQEWLEQLNRLIR  
.....EYPHTFQVSGKER.....-TLELQASSAQDKEEWIKALQETID  
gafnsneKAKNIFRIRFhDP.....spaQSHTLQANDVFHKQQWFNCIRAAIA

.....SGLRFEIWFrr.....rksqDTYILQASSAEVKS AWTDVIGRILW  
.....-DPCR FALTSrGP.....eggiQRYVLQAADPAISQAWIKHVAQILE  
kavrqKEDCCFTILYgTQ.....fvISTLSLAADSKEDAVNWLSGLKILHQ  
dddfnvSMKNAFKLHNkET.....eEIHLFFAKKLEEKIRWLR AFREERK  
.....YYSHGITLVTPLS.....gsekkQVLHFCALGSDEM QKFVEDLKESIA  
...kmKPPTSWGLTAySE.....kHHWHLCCDSSRTQTEWMTSIFIAQH  
.....TKKHAIGIYFnDD.....TSKTFACESDLEADEWCKVLQMECV  
...wGVPHCLTLRGqRQ.....-SIIVAASSRSEMEKWVEDIQMAID  
dvyradakEIPRIFQILYaNE.....geskKEQEFVPEPVGEKS-----NYICH  
.....NTAHTFIITGrKR.....-SLELQTRTEEEKKEWIIQATIE  
.....-SNLRFEIWFrr.....karDTFVLQASSLAIKQAWTADISHLLW  
igagqggvrdalDKQYYFTVLFgHE.....gqKPLELRCEEEQDGKEWMEAIHQASY  
...wSVPHCFTIYAaQK.....-TIVVAASTRLEKEKWMLDLNSAIQ  
LSFSVFHyKN.....pkLQHTVQAKSQQDKRLWVHLKRLIL  
.....-DPCKFALMnrET.....SERVVLQAANADIQQAWVQDINQVLE  
:gsgqvfgHLDFKIVVEPpDA.....aaFTVLLAPSRQEKAAWMSDISQCVD  
.....DHLYSFRILHkGE.....ELAKLEAKSSEEMGHWLG LLLSESG  
.....-DPCKFALWVgRT.....ptsdNKIVLKASSIENKQDWIKHIREVIQ  
.....pKKDFVFCLSNsLG.....DAFLFQTTSTQTELENWITAIHSACA  
.....-DPCKFALWSgRT.....pssdNKTVLKASNIETKQEWIKNIREVIQ  
:drdlhvsIKNAFRLHRgAT.....gDSHLLCTRKPEQKQRWLKAFARERE  
.....dyrKRKHVFKLGLqDG.....KEYLFQAKDEAEMSSWLRVVNAAIA  
...rklygmPTDFGFCVKPnKL.....rnghkGLRIFCSEDEQSRTCWLA AFRLFKY  
.....pKKENVFCLSNsFG.....DVYLFQATSQTDLENWVTAVHSACA  
.....PPTFRLSLLSnHQ.....grpTHRLLQASSLSDMQRWLGAFPTPGP  
:alsakeplEKQHYFTVNFsHE.....ngKALELRTEDAKDCDEWVAAIAHASY  
...eNHRNAFEISGsMI.....ERILVSCNNQQDLQEWVEHLQKQTK  
:dvkKWSYGFYLIHIQG.....kQGFQFFCKTEDMKR KWMEQFEMAMS  
.....-PNSFLLIHTE.....fqcvSALLVHCPSPDRAQWLEKTQQAQA  
...--PGSFLLIYINE.....fhsavGAYTFQASGQALCRGWVDTIYNAQN  
:kkhgaPTNYGFCFKPnKA.....ggprDLKMLCAEEEEQSRTCWVT AIRLLKY  
:dkdcnlSVKNAFKLVsrTT.....dEVYLFCAKKQEDKARWLQACADERR  
.....klrpPTCWGFTVVHeTE.....khekQQWYLCCDTQME LREWFATFLVQH  
...-EKGMFLISAaPP.....EMYEVTASRDDRSTWIRVIQQSVR  
...-EKAMFLISA sLQ.....gpEMYEIYTSSKEDRNAWMAHIQRAVE  
...dvyraeteEIPKIFQILYaNE.....gocrKDVEMEPVQQA EKT---NFQNHKG  
<qynaPTDHGLCIKPNKV.....rnetkELRLLCAEDEQTRTCWMTAFRLLY  
..NLPRTFLVSGkQR.....-SLELQARTEEEKDWVQAINSTLL  
.....-DNRKFEIWygEK.....eEVYIVQASNVDVKMTWLKEIRNILL  
:rdnkKWSHMFLLIEdQG.....aQGYELFFKTRELKKKWMEQFEMAIS  
.....-DAKKFEIWy nAR.....eEVYIVQAPTPEIKAAWVNEIRKVL T  
nkKWSYGFYLIHtQG.....qNGLEFYCKTKDLKKKWLEQFEMALS  
...-EKGLFLISMgMT.....dpEMVEVHASSKEERNSWIQIIQDTIN  
:EHKHAFELVSkDE.....NSIIFAAKSAAEEKNNWMAALISLHY  
...nEYKHAFEIILkDE.....NSVIFSAKSAAEEKNNWMAALISLQY  
...RKPNCFELYNpSH.....kgqvickackteadgrvvegnhVYRISAPSP EEEK EEWKSIKASIS  
...KKPNCFELYIpDN.....kdqvikackteadgrvvegnhTVYRISAPTPEEKEDWIKCIIKAAIS  
...RKPNCFELYIpNN.....kgqlikackteadgrvvegnhMVYRISAPTQEEKDEWIKSIQAAVS  
...KKPFCLELYNpSC.....rgqkikacktdgdgkvvegnhESYRISAANA EERDQWIEAIRASIT  
.....-RPNTFIIRCIQW.....ttvIERTFHVETPEEREEWATAIQTVAD  
.....-KPNTFIIRCIQW.....ttvIERTFHVDTP EEREEWTEAIQAVAD

.....-RPNTFVIRCIQW.....ttvIERTFHVDSPPEREEWMRAIQMVAN  
..nankspNPLLTFSVKThDR.....-IYYMVAPSPEAMRIWMDVIVTGAE  
...cafksSPRLTFCVKTyER.....-LFYMVAPSPEAMRIWMDVIVTAAD  
saakspNPALTFCVKThDR.....-LYYMVAPSAEAMRIWMDVIVTGAE  
...sfRMKNMFQVIQpER.....-ALYIQANNCVEAKDWIDILTKVSQ  
ipcQNKFQVQVHdAN.....-TLYIFAPSPQSRDRWVVKLKEEIK  
...sfNKKNMFQVIHtEK.....-TLYIQANNCVEANEWIDVLCRVSR  
.....nkkefENSYIFDINTiDR.....-IFYLVADSEEDMKNKWVRCICDIG  
essemegisiieRFPYPFQVvYdEG.....-PLYVFSPTTEELRKPWIHQKLVIR  
.....gfirkefQKNFVIVKtSR.....-TFYLVAKTEEEMQVWVHSISQVCN  
.....nkkelQDSFVFDIKTsER.....-TFYLVAEETADMKNKWVQSICQICG  
pcHYKYPFQVvHdNY.....-LLYVFAPDCEsrQRWVLTlKEETR  
...dimMRDNLFEIVTtSR.....-TFYVQADSPEEMHSHWIKAVSGAIV  
...tsNNVFPFKIiHiSK.....khRTWFFSASSEDERKSWMALLRREIG  
.....-KARRIDLDTeEH.....-IYHLKVKSQDWFDAWVSKLRHHRL  
..vkKSSKCIDLDTeEH.....-IYHLKVKSEELFDEWVSKLRHHRM  
..yeNRPLLIKLTtTS.....TEYFLEACSREERDSWAFEITGAIH  
ysqERVNCFCLVfpFR.....-TFYLCaKTGVEADEWIKLRWKLs  
gdllMRDNLFEIITtSR.....-TFYVQADSPEDMHSWIEGIGAAVQ  
...gvptgkgnVQGNLFKvITkDD.....THYYIQASSKAERAEWIEAIKkL-T  
.....-AQRIDLDTeDN.....-IYHLKIKSQDLFHSWVAQLRAHRL  
eeqtpvERQYPFQIVYkDG.....-LLVYASNEESRCQWLKALQKEIR  
..--KTFVHTpNR.....-TYYLMDPSG-NAHKWCRKIQEVWR  
.lfGRPNCFQIVVqHF.....seehYIFYFAGETPEQAEDWMKGLQAFCS  
.....-KENGIDIILaDR.....-TFHLIAESPEDASQWFSVLSQVHS  
.....eGKRcmFCVKTaSR.....-TYEMSASDTRQRQEWTAaiQTair  
...fgKRMFVLKITTtKQ.....QDHFFQAaFLEERDAWVRDIKKAiK  
.....RKKYAFKACHpKI.....KSFYFAAEHLDDMNRWLNrINMLTA  
jekmqSVQKMFKChPdEV.....msirtanRDYFLIGHDREKIKDWVsfMTPYcQ  
...dniSRKHTFKAeHaGV.....RTYFFSAESPEEQEAWIQAMGEaAR  
.....-KQTVQLATeKH.....-TYYLtADSPNILEEWIKVLQSVLR  
.tigapktvDEKAFFDVKTtRR.....-VYNFCAQDVPSAQQWVDRIQSCLS  
smgapkytSDKAFFDLKtSKR.....-VYNFCAQDGGQSAQQWMDRIQSCIS  
...nSEskVfQLLHkGM.....VFYVFKADDAHSTQRWIDAFQEGTV  
.....NWKKRWFVLRqSK.....-LMYFENDSE-----EKLKGTVE  
.....-HQHCLAFSSsGP.....qsQTYYICFDTFTEYLRWLRQVSKVAS  
.hdvksDEENLFEITaDE.....VHYLQAATSKERTEWIKAIQVASR  
.....KHkYLIALYtkDE.....-YFAVAaENEQEQEGWYRALDtlVS  
.....-TYYFSADTLedMNAWVRAMNQAaQ  
.....enPGKFLFDVVPgGE.....rdmrtanhESYLLMAStQNDMEDWVKsIRRViW  
.....RYRHlIALFTqDE.....-YFAMVAENESEQESWYLLLSRLIL  
.....-RRHAFELKMiDK.....YSHYLAaETEQEMEEWLiMLKkiIQ  
.....-EEFAFAVRFaGG.....rsRPYVLAADSQAALeGWVKALSRaSF  
.....EEEGTFEIKtPSR.....-VITLKAATKQAMLYWLQQLQMK-R  
...refcARRNTLELITvRP.....qreddretlvscrdtlcvTKNWLSADtKEERDLWMQKLNQVIV  
-MR.....-TYYFSADTLedMNAWVRAMNQAaQ  
.....-AQTFQLISgNK.....-TYYLtAESPSLLEEWIRVLQsLLK  
..eaaepgaDPPTHFQVHSaGA.....-VTVLkAPNRELMTYWLQELQqK-R  
.....-DSCLFSIRCFDD.....tvHCFRVPKNSVQSREKWLEaIEEHSa  
I.....KAFYFAaENLQEMNVWLNKLGFAVt  
...dhiNRKYAFKAAHPNM.....RTYYFCTDTGkEMELWmKAMLDaAL

.....GKPFVFNCPqSG.....sRILCLCATSNQEMKRWLEAMQRAAR  
YdVT.....saRDMLLLACSQDEQKKWVTHLVKKIP  
lyeaggtrIISSHCTLVIHPpEH.....SPTYLLIGTKHEKDTWLYHLTVAAG  
.....SMPYAMKISHqDF.....hGNVLLAAESEFEQTQWLEMLQESGK  
.....-DNKFEIVtQR.....-TFVFRVEKEEERNDWISILLSALK  
liqppdgkPRDCLLQIVCrDG.....KTISLCAESTDDCLAWKFTLQDSRT  
.....RQRHLIVIYTsDS.....-SLGVAAASEAEQQAWYSALLEVRA  
.....ksSKKNVLELRSrDG.....SEYLIQHDSEAIISTWHKAIAEGIS  
.....dGKKCLFLIKcFDK.....-TFEISASDKKKKQEWIQAISTIH  
elldvgnighLEQRMITVVYgPD.....laniSHLNLVAFQEEVAKewTNEVFLAT  
..-RQHSLAFSSaGA.....qaQTYHVSFETLAEYQRWQRQASKVVS  
.....-RKYAFELKMnDL.....TYFVLAETESDMDEWIHTLNRILQ  
.....-RKYAFELKMnDL.....TYFVLAETESDMDEWIHTLNRILQ  
.....-DPRVFQLQqSgQ.....-QYTFKAESVELQGRWVTAIKRAAS  
.....ksrskKNHskFTLARcRQ.....pgftaPNLIFLAVSPEEKESWINALSSAIT  
.....KNKHLVALYTrDE.....-HFAIADSEAEQDSWYQALLQLHN  
EIIIVSITG.....QTWHFEATTYEERDAWVQAIESQIL  
.....lkRKHHRFILLRsPG.....nkVSDIKFQAPSGEEKESWIKALNEGIN  
vlgfggpdtRIEEKLMTVVAGpDP.....vntTFLNFMAVQDDTVKVVSEELFKLAM  
.....KKKYVFQLTHdVY.....KPFIFAAETLSDSLKWVRHLITCIS  
.....KKKYVFQLTHdVY.....KPFIFAAETLSDSLKWVRHLITCIS  
RSFDLLTpHR.....-CFSFTAESGGARQSWAAALQEAVT  
.....ifKETGYWNVTVyGR.....kHCYRLYTKLLNEATRWSSAIQNVTD  
...dsiHKDYVFKLQFkSH.....-VYFFRAESKYTFERWMDVIKRASS  
.....-DNKFQVITgQR.....-VFVFRTESEAQRDLWCSTLQSCLK  
.....pkgirgnRWKAGLTVITpER.....-KFIFTCPTKEQREWLESRLRGVLS  
.....pKETGLWSVTVsGR.....kHSIRLCSPRQAEAEERWGVALREVIA  
.....RHIYFTLVTeGG.....GEIDFRCPLEDP--GWNAQITLGLV  
..gafQLPHVMQVVTqDG.....agtsHTTYLQCKNVNDLNQWLSALRKASA  
..psIIgEPYCFQVTWaGG.....-SLCFSCRSSAERDRWIEDLRRQFQ  
wlqanlylgldfdcedPRSYCFSVLAnHW.....KSHIFSVELGSELAVWEKAFQRATF  
..dthGFEHTFEVYTeGE.....RLYLFGLESAEQAHewVKCIAKAFV  
..NVNNSFTVITpCR.....-KLILCADNRKEMEDWIAALKTVQN  
..pdsERRFCFEVVSStSK.....-SCFLQADSERLLQLWVSAVQSSIA  
jssEVGPVFHLYHkKT.....LFYSFKAEDSNSAQRWMEAMEDASV  
.....dlldRRKHCFTMQSeCG.....EDLYFSVELESDLAQWERAFQTATF  
.....asspRDTSAFILEtKER.....-LYLLAAPSA-ERSDWIQAICLLAF  
.....DKRFCFDIEVvER.....hGIITLQAFSEANRKLWLEAMDGKEP  
.....vPEEFaFAIRFdAP.....gvRPHLLAADGQAAQEAWVKALSRSASF  
...peeAGKFVFEVIPaSS.....dqnrigqDSYVLMASSQVEMEEWVKFLRRVAG  
.....mGHPHGLQVTYIKD.....nstrNIFIYHEDGKEIVDWFNALRAARF  
..dGCDSCFQVIFpQD.....-VLRLRAETRQRAQEWMEALKTAAN  
.....-RRFAFELKMqDK.....SSYLLAADSEAEMEEWVTVLNKILQ  
.....-RRFAFELKMqDK.....SSYLLAADSEAEMEEWVTVLNKILQ  
.....ERRFCFEVVSptK.....-SCMLQADSEKLRQAWIKAVQTSIA  
..NANNSFTIITpFR.....-RLMLCAENRKEMEVWISSLSKVQS  
jlrffgafAPACCLTIaFkGR.....rKNLDLAAPTAAEAQRWVRGLAKLRA  
...iGHPHGLQITYrKE.....ghtRNLFVYHDSGKEIVDWFNALRAARL  
.....EAKHSFALYTpER.....trqrWPVRLAAATEQDMNDWLALLSLSCC  
..-PDNHFLlKTITV.....vsgpdmvdlTFYNFVSYKENVGKDWAEDVLALAK  
.....rkdgKKDCCFEICApDK.....RIYQFTAASPKDAEEWVQQLKFILQ



tpttapgtsPRANGLAMERsNT.....qlggATGAPHSASS-----TSLHSERP  
.....aprGRRFTFTAEPGM.....RTYVLAADTLEDLRGWLRLGRASR  
...NLCHGFCVITpHR.....-KVS LVAPTRQDMEEWINIIKT VQQ  
tsisqgSNPHCFEITdTV.....vyfvgengsssHNPVLAATGVDVAQSWEKAIRQALM  
.....fmSSKHVFAFNtEQ.....rnvykdyRFLELACDSQEDVDSWKASLLRAGV  
.....-DNTRMELIIPGE.....QHFYMKAVNAAERQRWLVALGSSKA  
.....EKRFCDVEAvDR.....pGVITMQALSEEDRRLWMEAMDGREP  
...qdvqpegrSRDGLLTVNLrEG.....SRLHLCAETRDDAIAWKTALMEANS  
.....knNRLFVFSISMpSV.....aqWSLDVAADSQEELQDWVKKIREVAQ  
.....DRRYCFQITSfDG.....kKSSILQAESKKDHEEWICTINNISK  
mkeksalkqnkeVLELAFSILYdPD.....ETLNFIAPNKYEYCIWIDGLSALLG  
.....iDKRFCDIETnER.....pGTITLQAPSEANRRLWMEAMDGKEP  
.....GHVDVIQYNGgSG.....ageHCRHHAHAAHSPESLA---VVANAKP  
...plstqghHWPHGITIVTpDR.....-KFLFTCETESDQREWIAAFQKVVD  
.....sSRKSVFQVRMpPV.....LNFLFPFN-----LSPLR  
NAFQVVAvDG.....vCSGILQCLSAEDCMDWLQAIASNIS  
.....nttDRPHAFQVILaDR.....PCLELSADSEAEMADWMQHLCQAVS  
.....-APHMLVVYSaNG.....EMYKLRAADSKEKQLWVTQLRACAK  
.....tGQKFSLCILTpDK.....-EHFIRAETKEIISGWLEMLMVYPR  
.....tGQKFSLCILTpDK.....-EHFIRAETKEIISGWLEMLMVYPR  
-DRRSFDLTTpYR.....-IFSFSADSELEKEQWLEAMQGAIA  
\_RNGWLIKTpTK.....-SFAVYAATATEKSEWMNHINKCVT  
.....ERRFCFEVVS pTK.....-SCMLQADSEKLRQAWVQAVQASIA  
.....eKKNPVFKLKTaDW.....RVLLFQTQSPEEMQGWINKINCVA  
.....sKMMHCFSVLStAA.....graVSHIFAADSLADFQEWMGAFRQHFF  
.....sKMMHCFSVLStAA.....graVSHIFAADSLADFQEWMGAFRQHFF  
...dthGFEHTFEVYTeGE.....RLYLFGLENAELAHEWVKCIAKAFV  
...eglEAGCAWKLHQgSQ.....-TWWLSAPSTKLQQCWLKALGTAVH  
jaegnfdPSCCFIYHgNH.....mESLDLITSNPEEARTWITGLKYLMA  
.....-DPLGFKVSDITL.....pkHRHLFQAKNQEEKRLWIHCLQRLFF  
.....-DSHTFTVNAaSG.....EQYKLRTDAKERQHWVSRLQICTQ  
.....sKRPHVFLRTaDW.....RVFLFQAPSLEQMMSWITRINVVAA  
.-VKQSFEIITpYR.....-SFSFTADSEREKQEWIEAVQQSIA  
rypdsfDPNCCFSIYHgSH.....rESLDLVSPSSEEARTWVTGLRYLMA  
.....RHPFAFRILRnRQ.....EVAILEASCSEDMGRWLG LLLVEMG  
.....pglegGRAFFNAVKEgD-.....-TVIFASDDEQDRILWVQAMYRATG  
.....tKRRNVFRLTTsDC.....-ECLFQAEDRDDMLSWIKTIQESSN  
.....ppRATSACAPISsPK.....tnglakdmSSLHISPNSDTGLG-----DSVCS  
ivgaselantakaDVPYILKMESHpH.....ttcwpgrTLYLLAPSPDKQRWVTALESVVA  
.....silGQEFCFEVTTsSG.....-TKCFACRSAAERDKWIENLQRAVK  
.....pqlqgQGVFFNAVKEgD-.....-TVIFASDDEQDRILWVQAMYRATG  
.....eKKNPVFKLKTaDW.....RVLLFQTQSPEEMQGWINKINCVA  
...KHPLTFRLLRnGQ.....EVAVLEASSSEDMGRWIGILLAETG  
pafRPDQSHCFVILYgME.....frIKTSLQATSEDEVNMWIKGLTWLME  
'NG.....KSYLFLSSDYERSEWREAIQKLQK  
.....-RNYGFQIHTkDA.....-VYTLSAMTSGIRRNWIEALRKTVR  
.....qapEWPFTLSISNKYG.....ddeVTNTLQLESREALQNWMEALWQLFF  
YGFQIHTkDA.....-VYTLSAMTSGIRRNWIEALRKTVR  
...-LRLYCDLLVqQV.....dKTKEVATAG-----  
.....tKRQAVAIIFTdDS.....-ARTFTCDSELEAEWYKTL SVECL  
.....DRRYCFQISTpSG.....kPGIILQAESRKEYEEWICAVNNISR

.....DRRYCFQISTpSG.....kPGIILQAESRKEYE EWICAVNNISR  
.....gtENNSTWELIHtKS.....eiegrpeTIFQLCCSDSENKTSIVKVIRSILR  
...lhgPHKNLFRFLIHN.....aqgtqVEFLFRTEQSEKLRWISALAMPRE  
.....fmSSKHIFALFNtEQ.....mvykdyRQLELACETQEEVDSWKASFLRAGV  
.....qkpKTPFCFVINAISQ.....-RYFLQANDQKDLKDWVEALNQASK  
.....-----SEaSP.....-QVHPFPDHEEDMKTkISALKSEIQ  
skKKKHELKITQqGT.....DPLVLAVQSKEQAEQWLKVIKEAYS  
dfyIntGPIFVFEIYLpSE.....RVFLFGAETSQIQRKWTETIAKRFV  
...-KYVYFTIVTnYY.....KEIDFRCTVE---SCWNAAITMALI  
1eiCTCKTLYLHCpNG.....-HFWATFRSQEQKDQWHYFLQRSIH  
.....EHPDLFLLTDsEK.....gNSYKFQAGSRMNAMLWFKHLSAACQ  
.....reQQKKCFKSFSITS.....VELQMLTNSC-----VKLQTVHH  
fyIntGPIFIFEIYLpSE.....RVFLFGAETSQAQRKWTEIAAKHFV  
...phssilGQDFCFEVTYISG.....-SKCFSCSSASERDKWMENLRRTVQ  
GKHLFEITPgGA.....terekvpanpEALLLMASQRDMEDWVQAIRRVIW  
..SRHKRHELRFsQG.....atEVLVLALQSREQAEEWLKVIREVSR  
VFEFLIVSsTG.....QTWHFEEAASFEERDAWVQAIESQIL  
..krrdrSLPRAFEIFTdSK.....-TYVFKAKDEKNAEEWLQCINVALA  
AKNRWMIKtAKK.....-SFVVSAASTTERQEWISHIEECVR  
.....-RNYGFQIHTkEG.....-EFTLSAMTSGIRRNWIQTIMKHVL  
...fmSNKHVFAIFNtEQ.....mvykdIRQIELACDSQEDVDSWKASFLRAGV  
.....KVPYALKIETpES.....-CLTSSASSCAERDEWHYCLSRALP  
.....EHPDLFLLTDsEK.....gNSYKFQAGSRMNAMLWLKHLSAACQ  
.....-PPRAISAFGpSA.....-SINGLVKD-----MSTVQMGE  
..phmkekqalkqnkeVLELAFSILYdSN.....CQLNFIAPDKHEYCIWTDGLNALLG  
.....-PGGFSSISFvED.....IsRKYHFECSSQEQCQDWMEALQRASY  
..eniHKDYVFKLHFkSH.....-VYYFRAESEYTFERWMEVIRSATS  
ELKMnDL.....TYFVLAETESDMDEWIHTLNRILQ  
.....erpDRRHVFKITQsHL.....-SWYFSPETEELQRRWMAVLGRAGR  
.....ksSKKNVFELKTrQG.....TELLIQSDNDAVINDWFKVLSSTIN  
.....TKKHAVAIIIFhDE.....TSKTFACESELEAEWCKHLCMECL  
.....crspslGSDLTFATRTgSR.....qgiEMHLFRVETHRDLSTWTRILVQGCH  
.....DRRFCFDIEAaDR.....pgVPLTVQAFSEEERKQWLEALGGKEA  
.....-----KMKPpTR.....-----  
.....aDLPHSFKLTQsKS.....-VHSFAADNEELKQKWLKIILLAVT  
KEIRSFLIEGhLI.....NTIRVVCASYEDYSQWLLCLRTVSR  
...rkdsKKESCFELISqDR.....RSYEFTASSPAEARDWVDQISFLK  
/lapdvihqskDLPRIFRVTAsQL.....tppptCTVLLLAENEGERERWLQVLGELQR  
..krrdrSLPRAFEIFTdSK.....-TYVFKAKDEKNAEEWLQCINVALA  
.....AYQNELKIESvER.....-SFILSASSAAERDDWLEAISSSIE  
sendLEGRILCVCSgTD.....lvnIGFYMVAENPEVTKQWVEGLRSIIH  
.....KDRKCILLRIkGG.....KQFVLQCESDPEFAQWLKELTCTFN  
.....-DECRFDISVnDS.....-VWYLRAQDPEHRQQWVDAIEQHKT  
...-EKRCFDLVThNR.....-TYHFHAEDEQECEAWVSVLQNSKD  
..aGSVNGLKITpEE.....-QFTLISSTPQEKTkWLRAISQAVD  
vppgTNPFCFEITaNV.....tyfvgetpggagppSGQGTEAVR----GWETAIRQALM  
.....---CNFIISNgGA.....QTYHLKASSEVERQRWVTALELAKA  
..ggTLANVFILRLIEN.....addreATYMLKASSQSEMKRWMTSLAPNRR  
..ellrylveefPLEQGFTVVfGR.....rPNLDLVANSVEEAQIWMRGLQLLVD  
hsngyTVTNGWKIHntAK.....NKWFVCAKTAEEKQKWL DALIRERE  
DSLCTFTVTHyKH.....skQQYSIAKTVEEKRSWTHHIKRLIL

.....--CGILLCNgAR.....-TYHLKASSEVDRQHWITALELAKA  
.....kKKKHVFKLQTqDG.....SEFLQAKDEEEMNGWLEAVANSVA  
.....-DPCKFALTSrTG.....davETFVLHSSSPSVRQTWIHEINQILE  
.....etKRRHVFRLLTaDF.....CEYLFQAEDRDDMLGWIRAIENSR  
.....sKKS NVLKLK TaDW.....RVFLFQAPSKEEMLSWILRINLVAA  
.....sSRRNVLHIRTvPG.....HEFLQSD EETELRDWHRALRTVIE  
.....EHPDIFQLNNpDK.....gNVYKFQTGSRFHAILWHKHLDDACK  
teKNCAKFTLVLPKE.....-EVHVKTENTESGEEWRGFILTVTE  
.....-EKKCFDLIShDR.....-TYHFQAED EQECQIWMSVLQNSKE  
sgekqrhsrsrRRRNVLRRQPtRI.....sKTFRLVAIE-----LTGMTATLE  
.....-GDQKFEVITnNR.....-TFAFRAESDVERNEWMQALQQAVV  
..KDGFCFKLFHpLE.....qsiwavkgpkgeavgsitqplpsSYLIIRATSESDGRCWMDALELALK  
nkykaPTDHCFLKHpQI.....qkesqYIKYLCCDDARTLSQWVMGIRIAKY  
...-DKKSFDLIShNR.....-TYHFQAED EQDYIAWISVLTSKE  
lftpvgATPHCFEITTaNV.....vyyvgenvnpssspnNSVLP SGIGPDVARMWEVAIQHALM  
.....tKKPHVFLRRTaDW.....RLYLFQAPTAKEMASWIARINLAAA  
...lqgipGHVFLRLHqQR.....arHQLLRARTESEKQRWISALRPSSP  
.....tETRYGVRIDTsHR.....-SLILKCSSYRQARWWGQEITELAQ  
...vrKKGHKLKIPmNA.....DVIVLGLQSKDQAEQWLRVIEVSG  
sgekqrhsrsrRRRNVLRRQPtRI.....sKTFRLVAIELTGMT---ATLEVSFS  
...FEQPVELKPsSE.....efKTFYFCAENKTENQRWIAALKTSIK  
:glekfardiPEDRCFSIVFkDQ.....rNTLDLIAPSPADVQHVVQGLRKIID  
.....eDCHNAFALLVrPP.....teqanVLLSFQMTSELPKESWLKMLCRHVA  
.....empDNL YTFVLKVqDQ.....TDIIFEVGDEQQLNSWLAELRASTG  
.....empDNL YTFVLKVqDQ.....TDIIFEVGDEQQLNSWLAELRASTG  
..KDGFCFKLFHpLD.....qsvwavkgpkgesvgsitqplpsSYLIFRAASESDGRCWLDALALR  
kmfeneflllnSPTIPFRIHNrNG.....KSYLFLSSDYERSEWREAIQKLQK  
...rnkykaPTDCCLALKHpQI.....qkksqYIKYLCCDDARTLHQWVNGIRIAKY  
ngiseqiSEDCAFSIVYgEN.....yESLDLVANSADVANIWVTGLRYLIS  
...eGSDCMFEITGsTV.....ERIVVHCNNNQDFQEWMEQLNRLTK  
.....YYQFGIKLLSaVP.....ggerkVLIIFNAPSLQDRLRFTSDLRESIA  
rggssrssSVPYPFQVNLIHn.....segrqEQILLSSDSASDRARWITALTYKER  
nagpagardaIDKQYYFTVLFgHD.....gqKPLELRCEEEQAGKEWMEAIHQASY  
.....daEANAVCEIVHvKS.....esegpeRVFHLCCSSPESRKDFLKS VHSILR  
sGDEPIFHISHiDR.....-VYTLRAESINERTAWVQKIKAAASE  
.....KERKCLLLKlrGG.....KQFVLQCDSDPELVQWKKELRDAYR  
.....sppePGAAAFRLDTaQR.....-SHLLAADAVSSTA-WVQTLCRTAF  
knpstmlysrqsSATHLFTLTVISN.....hasekVDMLLGAETQSERARWITALGHSSG  
.....empEKDNTFVLKVeNG.....AEYILETIDSLQKHSWVADIQGCVD  
niplvpdEELDALKIKIsQI.....-----KSDIQREKR  
.....-SGLCFELWFrRR.....rarEAYTLQATSPETKWKWTSSIAQLLW  
<gsvpyDAELSFALRTgTR.....hgvDTHLFSVESPQELAAWTRQLVDGCH  
.....pPMKDMFKLLMfPE.....-SRIFQAENAKIKREWLEVLEETKR  
:sdvahasrkDIPCIFRVTAsQL.....sapsnkCSILMLADSENERSKWVGVLSELHK  
.....EFPHSFLVSGkQR.....-TLELQARSRDEMVSWMQACQAAID  
...EYPHTFQISGker.....-TLELQASSEQDKEEWIKALQESID  
.....kKKKHVFKLRLsNG.....SEWLFHGKDEEEMLMWLQSMSTAIN  
..kgsppqaGMDLSFATRTgTK.....qgiETHLFRAEISRDL SHWTRSIVQGCH  
akavrhKAECCTILYgTQ.....fvISTLSLATDSKEDAVKWL SGLKILHQ  
<drdlhvSVKNAFRLYcgtT.....gDSHLLCARKPEQKQRWLKAFARERE  
.....-SSHIMQVIYaDD.....vgraQTVYLQCKCVNELNQWLSALRKAST

.....tETKYGLRIDNISR.....-TLILKCNSYRHARWWGGAIEEFIR  
.....kkkkHVfKLRlSdG.....NEYLFQAKDDEEMNTWQAISSAIS  
jafgnsdKAKNIFRVRfQDP.....spgHSHTLQANDVFHKQQWFNCIRAAIA  
...kmKPPTSWGLTVySE.....kHHWHLCCDSLQAQMEWMASIFIAQH  
...qamIKTPNTFAVCTeHR.....-GILLQANSDKMDHDWLYAFNPLLA  
.....empDRENTFVVKVeGP.....SEYILETS DALHV KAWVSDIQECLS  
...-SDGRFELVfSgK.....-KLALRASSQDEAEDWLDREVREALQ  
...kgsppqaGMDLSFATRTgTK.....qgiETHLFRAEISRDL SHWTRSIVQGCH  
.....YYSHGITLATpLS.....gsekkQVLHFCALGSDQM KFVEDLKESIA  
.....TKKHAIGIYFnDD.....TSKTFACESDLEADEWCKVLQMECV  
...wGVPHCLTLRGqRQ.....-SIIVAASSRSEM EKWMEDIQMAID  
dvyradakeIPIRFQILYaN E.....geskKEPEFPVPEVGEKS-----NYICH  
...wSVLHCFTIYAaQK.....-TIVVAASTRLEKEKWMQDLNAAIQ  
.....sggPCGGLLSLSFpHE.....-KLLLMSTDQEELS QWHHSLTLAIR  
ddfnvSMKNAFKLHNkET.....eEVHLFFAKKLEEKIRWLRAFREERK  
LSFSVFHyKN.....pkLQHTVQAKSQQDKRLWVLHLKRLIL  
dkdwsISLRNAFKLVSkAT.....dEVHLFCARKQEDKARWLQAYADERR  
.....TKKHAIGIYFnDD.....TSKTFACESDLEADEWCKVLQMECV  
.....empDRENTFVVKVeGP.....SEYILETS DALHV KAWVSDIQECLS  
.....-NPCRFALTSrGP.....eggiQRYVLQASDPAVSQAWIKQVAQILE  
.....PPTFRLSLLSnHQ.....grpTHRLLQAASLSDMQRWLGAFPTPGP  
.....NAACTFIITGrKR.....-SLELQTRTEEEKKEW IQVIQATVE  
.....sGQKFNIKLLIpVA.....egmNEIWLRC DNEKQYAHWMAACRLASK  
.....-PNSFLLIHITE.....fqcvSALT VHCPSS TERARWLEKTQHAQT  
qamvKTPNTFAVCTkHR.....-GVLLQALNDKMDNDWLYAFNPLLA  
.....-DPCKFALWVgRT.....ptsdNKIVLKASSIENKQDWIKHIREVIQ  
sSDEPVFHISHiDR.....-VYTLRTDNINERTAWVQKIKGASE  
.....pKKDFVFCLSNsLG.....DAFLFQTTSQTELENWITAIHSACA  
.....-DPCKFALWSgRT.....pssdNKTVLKASNIETKQEWIKNIREVIQ  
..asdvihatrrDIPICIFRVTAsLL.....gspsktSSLLILTENENEKRK WVGILEGLQA  
.....-DPCKFALMNRtET.....sERVILQAANS DIQQAWVQDINQVLE  
.....-DPCKFALMNRtET.....sERVILQAANS DIQQAWVQDINQVLE  
.....dyrKRKHVfKLG LqDG.....KEYLFQAKDEAEMSSWLRVVNAAIA  
...klrpPTCWGFTVvHeTE.....khekQQWYLCCDTQME LREWFATFLSVQH  
.....rklygmPTDFGFCVKPnKL.....rng hkGLHIFCSEDEQSR TCWLA AFRLF KY  
...-PGSFLLIYINE.....fhsavGAYTFQASSQALCRSWVDTIYNAQN  
...eNHRNAFEISGsMI.....ERILVSCTSQQDLHEWVEHLQKQTK  
.....DHLYSFRILHnGE.....ELAKLEAKSSEEMGHWLG LLLSESG  
jgslrgafsnneRVKNFFRV SFkNG.....sqS QTHSLQANDTFNKQQWLN CIRQAKE  
.....pKKEHVfCLSNsCG.....DVYLFQATSQTDLENWVTAIHSACA  
gkkkhgaPTPYGFCLKPNKA.....ggprDLKMLCAEEEQSR TCWVTAIRLLKD  
.....-DNRKFEIRYsEK.....eEIYIVQAPNVDVKMLWLKEIRKILV  
.....-SQLRFEIWFrrR.....karDLFVLQASDVATKQAWTADISRLLW  
.....-EKAMFLISAsMQ.....gpEMYEMYTSSKEDRNIWMAHIRRAVE  
tsskesgeKQQHYFTVNFsND.....sqKTLELRTE DAKDCDEWVA AIARASY  
...-AKGMFLISSgPP.....EMYEVHAASRDRRTTWIRVIQSVR  
kshgkMWSYGFYLIHIQG.....kQGFQFFCKTEDMKRKWMEQFEMAMS  
..dvyraeteEIPKIFQILYaN E.....gecrKDVEMEPVQQA EKT---NFQNHKG  
...-AKGVFLISSgPP.....EMYEVHAASRDRRTTWIRVIQSVR  
..NMPRTFLVSGkQR.....-SLELQARTEEEKKDWVQAINSTLL  
.....-DTKKFEIWyNAR.....eEVYIIQAPTPEIKAAWVNEIRKVL T

nkKWSYGFYLIHtQG.....qNGLEFYCKTKDLKKKWLEQFEMALS  
rdnkKWSHMFLLIEdQG.....aQGYELFFKTRELKKKWMEQFEMAIS  
ckqynaPNEHGMCIKPnKA.....ktemkELRLLCAEDEQIRTCWMTAFRLLKY  
cEYRHAFELVSkDE.....NSVIFAAKSAEEKNNWMAALISLHY  
...-EKGLFLISMgVK.....dpEMVEVHASSREERNSWIQIIQDTIN  
...sEYKHAFEIILkDG.....NSVIFSAKSAEEKNNWMAALISLQY  
...-ERGMFLISAsSA.....gpEMYEIHTNSKEERNWWMRRIQQAVE  
csnseQGKNKFILRTnSN.....glihrghNWVFKVDSYDDMIEWFGNIKALSS  
...--DKIIIDSgME.....-VWVLKATTKENWQSWVDALQTCFD  
vslyaastgKGRYCFKLLPpQP.....gskkgltftqpRTHYFAVDNKEEMRGWMAALIKTTI  
islyaaslgKGYCFKLVpQP.....gskkgltftepRVHYFAVENKSEMKAWSAIKATI  
sspnstGSDAKFVLHAKQN.....giiirghNWVFKADSYESMMSWFDNLKILTS  
.....-EKLKFEIIGgNN.....gvIRWHLKGNHPIETNRWVWAIQGAIR  
nftdwwLFNECFQLVfDG.....ERITFNAECSEEKSDWYNKLQEVVE  
..-KQYCFELVRcSD.....rnsvsngsssslnvsdsnsksSIYIATKTESDLHSWLDAIFAKCP  
mkNDDTNFALITfDE.....-RLSFKAANDQDMVDWIINFKSGIL  
iildkngskthqkksNISSKLLLLTIEN.....seRKLKIICKSESSLKQWMSSIIKMST  
ksseldqfyaqaqKESNNYVTWtFKI.....VSPEPSEEELKHFKRWVQDLKNLTS  
.....PRNFCFKLRlqNP.....nckteeentyIDIILQAESIDELKSWINTLTSHKR  
.....-EKLNFELLGgIT.....gtTRWRLKGNHPIETTRWVNAIQSAIR  
...-KQNCFEILRaTD.....qkenispinsyfyesnskRSIFISTRTERDLHGWLDAIFAKCP  
rlrsDSKLWIAIYkVS.....nkIKALHVVALNELDFNTFLSCICGLVK  
snteisnnpnTDEFsFKIRNtAT.....gESFKFFTESAEVLNQWIDAIMESFK  
rgSATKTFKLYtDES.....-TFKFNADSEFSKSWVNALKKEQF  
...tKKSFLRMSCeSE.....-QFLLRFSHIDDMIDWSMYLSIGIS  
repkldlrgrIMIMNLNQIIPqNN.....rslnitwesikeqGNFLLKFKNEETRDNWSSCLQQLIH  
rfGTRNGFLITEhKK.....sglstsTKYYICTETSKERELWLSAFSDYID  
rvygdgwrsvdedESSRCFTLWFgTRdppsapeadlnnsnvsntdkihftkklgvsgKSMVFMARSQRERDLWVMSIY'  
inhmripAYYYAFKIVMqNG.....HEYLQATASSDLTEWIKMIKASKR  
.....ptgLYHKSIVVtTeTR.....-TIKFTCPTRQRHNIWYNSLRYLLQ  
snvcnknkRKSGNFTVSfPnEN.....ingpkLVLEFQTRSVEEAHKFMDCINFWAG  
.....-RKFCFEVKIfGN.....kvtedahnmSkdITLVFQTSNYLDLKSWLIAFEATKK  
...dnivmecgkNLTNALVVSttLK.....NRYFLQFGNKESFNANSAIRLCLY  
qviiasenektKDLDNVLVVSttLK.....NRYFLKFKNSKSFKTWNAAIRLSLF  
.....SRKFCFEVITpQT.....-KRTYQATSKAEMHSWIEAIQYSIS  
.....SRKFCFEVITpQT.....-KRTYQATSKAEMHSWIEAIQYSIS  
.....GRRFCFEVVTpKL.....-KRLYQATSAEEMDSWIEAICEAAK  
...NNEHGWWVETpTK.....-SWSFEDPNG-PASAWVELLDKASS  
...NNEHGWWVETpTK.....-SWSFEDPNG-PASAWVELLDKASS  
.....nVRNCSFTVIFrDG.....SEETLCAPTEESMIEWVAKINYIST  
.....nVRNCSFTVIFrDG.....SEETLCAPTEESMIEWVAKINYIST  
.....-QPTVFQVIGkGS.....VRYSVKANSPVEAKKWIAAIISSAIE  
edavvlksTNSLYFDLETsSQ.....LKLRFAGPSPKDAQGWIDALNYWAA  
efttgeNYQSAFVIQEkQT.....etrtgtaTVHVLLARDVEDQKSWLRILRQVP  
efttgeNYQSAFVIQEkQT.....etrtgtaTVHVLLARDVEDQKSWLRILRQVP  
.....HRKFCFQIKtKsv.....-SYILQAETHMEMLEWGSVINNARE  
.....vlsGGKTAIKLIPpAP.....gaakaavmftppKVHYFTCENNEELHRWSSAFLKATV  
.....vlsGGKTAIKLIPpAP.....gaakaavmftppKVHYFTCENNEELHRWSSAFLKATV  
.....-RTFCFKLRFkSS.....tknfeiQACELSVADNMECYEWMDLISSRAL  
ykisseNEKRWFtIYcAD.....nkIKAMHMISPTLDAHNQWIMALEGLKT  
ykisseNEKRWFtIYcAD.....nkIKAMHMISPTLDAHNQWIMALEGLKT

<TFFLYLnEK.....-IIRLIATSNEDAEWVHVRSTTG  
.-THEINVDSgVE.....-LWNLRAHATHQDWLRWCNALEKAKN  
.....sinsNRNNVFYLNpGN.....ECYLFEAPSVLAMNEWIHSLNFNAA  
..-KKPKFKITGkDA.....tkkifgarNDYAFRASNTELMRWWEALNTHIA  
:eelegylYFESGFRIIFsNG.....DYIDFYAETVGEKDEWMSTLRQHLG  
skdtnekirLSHHSFKIKNrQK.....-VMKLSVRSG---RWLQQFINSVQ  
...esSHKYFFTVITqNK.....-PIEFRVDNEDSLILWVAALKTSID  
vsnlGLVAGILATSvDR.....RHVQLFADSKKVCQKWLQVMNSRSF  
vsnlGLVAGILATSvDR.....RHVQLFADSKKVCQKWLQVMNSRSF  
.....--NKFTINFnNG.....KSETLEALDPESKNTWITDLKNAIA





















:E































YELE

Type of file: table

Label: Table 7

Filename: mmc13.xls

**Supplementary Table 7, Park et al.**

**Cloned and tested PH-domain constructs with total number of cells t**

| <b>Species</b>    | <b>Name</b>   | <b>Score</b> | <b>NP_number</b> |
|-------------------|---------------|--------------|------------------|
| <b>Celegans</b>   | akt-2-PH1     | 57.5         | NP_001024612     |
| <b>Celegans</b>   | akt-1-PH1     | 47.7         | NP_001023647     |
| <b>Celegans</b>   | sec7-PH1      | 36.0         | NP_498764        |
| <b>Celegans</b>   | obr-1-PH1     | 0.7          | NP_499448        |
| <b>Celegans</b>   | let-502-PH2   | -0.1         | NP_491440        |
| <b>Celegans</b>   | F59A6.5-PH1   | -6.4         | NP_494921        |
| <b>Drosophila</b> | Grp1-PH1      | 76.5         | NP_001036375     |
| <b>Drosophila</b> | Akt1-PH1      | 60.1         | NP_732113        |
| <b>Drosophila</b> | Btk29A-PH1    | 42.2         | NP_723369        |
| <b>Drosophila</b> | CG14366-PH1   | 26.9         | NP_650310        |
| <b>Drosophila</b> | CG5004-PH1    | 18.9         | NP_573195        |
| <b>Drosophila</b> | vap-PH1       | -6.0         | NP_996482        |
| <b>Human</b>      | PSCD4-PH1     | 79.4         | NP_037517        |
| <b>Human</b>      | LOC653583-PH1 | 54.8         | XP_933317        |
| <b>Human</b>      | PHLDB2-PH1    | 54.8         | NP_665696        |
| <b>Human</b>      | GAB3-PH1      | 40.2         | NP_542179        |
| <b>Human</b>      | OSBPL6-PH1    | 33.1         | NP_665682        |
| <b>Human</b>      | DEF6-PH1      | 18.3         | NP_071330        |
| <b>Human</b>      | RASA1-PH1     | 17.9         | NP_002881        |
| <b>Human</b>      | SBF1-PH1      | 7.7          | NP_002963        |
| <b>Human</b>      | PLEKHH1-PH1   | 6.2          | NP_065766        |
| <b>Human</b>      | OSBPL1A-PH1   | 2.8          | NP_579802        |
| <b>Human</b>      | ARHGAP25-PH1  | -3.7         | NP_001007232     |
| <b>Human</b>      | CENTD2-PH4    | -41.8        | NP_001035207     |
| <b>Mouse</b>      | Pscd3-PH1     | 89.6         | NP_035312        |
| <b>Mouse</b>      | Pscd2-PH1     | 87.1         | NP_035311        |
| <b>Mouse</b>      | Akt1-PH1      | 70.2         | NP_033782        |
| <b>Mouse</b>      | Akt3-PH1      | 68.0         | NP_035915        |
| <b>Mouse</b>      | Akt2-PH1      | 64.3         | NP_031460        |
| <b>Mouse</b>      | Phldb1-PH1    | 53.7         | NP_705765        |
| <b>Mouse</b>      | Rasa3-PH1     | 48.2         | NP_033051        |
| <b>Mouse</b>      | TEC-PH1       | 47.9         | BAE23957         |
| <b>Mouse</b>      | Rasa2-PH1     | 46.9         | NP_444498        |
| <b>Mouse</b>      | Gab1-PH1      | 45.4         | NP_067331        |
| <b>Mouse</b>      | Btk-PH1       | 44.8         | NP_038510        |
| <b>Mouse</b>      | Gab2-PH1      | 41.2         | NP_034378        |
| <b>Mouse</b>      | Itk-PH1       | 37.8         | NP_034713        |
| <b>Mouse</b>      | Plekha1-PH1   | 33.5         | NP_598703        |
| <b>Mouse</b>      | Sh3bp2-PH1    | 33.2         | NP_036023        |
| <b>Mouse</b>      | Osbpl3-PH1    | 32.0         | NP_082157        |
| <b>Mouse</b>      | Plek2-PH1     | 32.0         | NP_038766        |
| <b>Mouse</b>      | Dapp1-PH1     | 30.2         | NP_036062        |
| <b>Mouse</b>      | Plekha2-PH2   | 29.4         | NP_112547        |
| <b>Mouse</b>      | Plek2-PH2     | 24.1         | NP_038766        |



|       |                   |       |              |
|-------|-------------------|-------|--------------|
| Mouse | Osbpl7-PH1        | 23.9  | NP_001074903 |
| Mouse | PDPK1-PH1         | 21.3  | NM_011062    |
| Mouse | Myo10-PH1         | 17.6  | NP_062345    |
| Mouse | Plek-PH1          | 16.0  | NP_062422    |
| Mouse | Cnksr2-PH1        | 13.0  | NP_808419    |
| Mouse | Fgd6-PH2          | 8.3   | NP_444302    |
| Mouse | Myo10-PH2         | 8.1   | NP_062345    |
| Mouse | Phlpp-PH1         | 8.0   | XP_990044    |
| Mouse | Plek-PH2          | 7.9   | NP_062422    |
| Mouse | Plekha5-PH1       | 2.3   | NP_659169    |
| Mouse | 2610034M16Rik-PH1 | 2.2   | NP_081277    |
| Mouse | Plekha2-PH1       | 0.1   | NP_663491    |
| Mouse | Swap70-PH1        | -1.7  | NP_033328    |
| Mouse | Plekho1-PH1       | -2.6  | NP_075809    |
| Mouse | Irs1-PH1          | -2.6  | NP_034700    |
| Mouse | Myo10-PH3         | -2.9  | NP_062345    |
| Mouse | Rasal1-PH1        | -4.5  | NP_038860    |
| Mouse | CENTD2-PH1        | -4.9  | NM_027180    |
| Mouse | DGKD-PH1          | -5.0  | XM_906228    |
| Mouse | Skap2-PH1         | -7.0  | NP_061243    |
| Mouse | Plekha3-PH1       | -8.4  | NP_112546    |
| Mouse | Plekha1-PH1       | -8.6  | NP_038774    |
| Mouse | Ophn1-PH1         | -9.2  | NP_443208    |
| Mouse | Plekha2-PH1       | -9.6  | XP_985312    |
| Mouse | AA536749-PH1      | -9.7  | NP_957697    |
| Mouse | Centb5-PH1        | -10.0 | NP_997106    |
| Mouse | Cadps-PH1         | -11.2 | NP_001036082 |
| Mouse | Cit-PH1           | -12.2 | NP_031734    |
| Mouse | PSD3-PH1          | -12.7 | NM_177698    |
| Mouse | TRIOBP-PH1        | -13.6 | NP_001074771 |
| Mouse | Dok4-PH1          | -13.9 | NP_444476    |
| Mouse | Dnm1-PH1          | -14.3 | NP_034195    |
| Mouse | Plekha2-PH1       | -14.3 | NP_112547    |
| Mouse | Afap1-PH1         | -14.6 | NP_081649    |
| Mouse | CENTD1-PH1        | -15.4 | XM_132099    |
| Mouse | VEPH1-PH1         | -16.1 | NM_145820    |
| Mouse | Plekha1-PH1       | -16.1 | NP_077724    |
| Mouse | AA536749-PH2      | -16.2 | NP_957697    |
| Mouse | Dnm2-PH1          | -16.3 | NP_001034609 |
| Mouse | RALGPS2-PH1       | -16.5 | NM_023884    |
| Mouse | Plekha1-PH1       | -17.1 | NP_076389    |
| Mouse | Farp1-PH2         | -17.3 | NP_598843    |
| Mouse | Fgd1-PH2          | -17.5 | NP_032027    |
| Mouse | Sntb2-PH1         | -18.4 | NP_033255    |
| Mouse | Arhgap10-PH1      | -18.6 | NP_084389    |
| Mouse | CENTD1-PH2        | -18.7 | XM_132099    |
| Mouse | Fgd6-PH1          | -19.3 | NP_444302    |
| Mouse | Col4a3bp-PH1      | -19.5 | NP_075909    |
| Mouse | Ngef-PH1          | -20.1 | NP_063920    |
| Mouse | Plcd4-PH1         | -20.2 | NP_683739    |
| Mouse | Psd2-PH1          | -21.5 | NP_082983    |

|       |                   |       |              |
|-------|-------------------|-------|--------------|
| Mouse | Apbb1ip-PH1       | -22.8 | NP_062329    |
| Mouse | Ddef1-PH1         | -22.8 | NP_034156    |
| Mouse | Prkcm-PH1         | -22.8 | NP_032884    |
| Mouse | Pld2-PH1          | -23.1 | NP_032902    |
| Mouse | RASGRF1B-PH1      | -23.2 | NM_001039655 |
| Mouse | 2610034M16Rik-PH2 | -23.5 | NP_081277    |
| Mouse | Plcd1-PH1         | -23.5 | NP_062650    |
| Mouse | Osbpl5-PH1        | -24.0 | NP_077251    |
| Mouse | ABR-PH1           | -24.3 | NM_198894    |
| Mouse | Plcl2-PH1         | -24.5 | NP_038908    |
| Mouse | Rasgrf2-PH1       | -25.0 | NP_033053    |
| Mouse | Tiam1-PH2         | -25.3 | NP_033410    |
| Mouse | Itsn1-PH1         | -25.5 | NP_034717    |
| Mouse | Adrbk1-PH1        | -25.7 | NP_570933    |
| Mouse | DOK1-PH1          | -26.0 | NM_010070    |
| Mouse | Sh2b2-PH1         | -26.1 | NP_061295    |
| Mouse | Snta1-PH1         | -27.1 | NP_033254    |
| Mouse | Fgd2-PH1          | -27.8 | NP_038738    |
| Mouse | Rasa4-PH1         | -29.3 | NP_598675    |
| Mouse | Pld1-PH1          | -29.5 | NP_032901    |
| Mouse | Spnb2-PH1         | -30.2 | NP_787030    |
| Mouse | Net1-PH1          | -30.2 | NP_062645    |
| Mouse | KIF1A-PH1         | -30.4 | NM_008440    |
| Mouse | SH2B1-PH1         | -30.5 | NM_011363    |
| Mouse | Plekhm1-PH1       | -31.6 | NP_898855    |
| Mouse | Sntb1-PH1         | -31.7 | NP_057876    |
| Mouse | DOK5-PH1          | -31.9 | NM_029761    |
| Mouse | Farp1-PH1         | -32.1 | NP_598843    |
| Mouse | D10Ert610e-PH1    | -33.5 | NP_082303    |
| Mouse | Fgd3-PH1          | -34.2 | NP_056574    |
| Mouse | PLEKHC1-PH1       | -35.2 | NM_146054    |
| Mouse | KIF1B-PH1         | -35.5 | NM_207682    |
| Mouse | Itsn2-PH1         | -36.0 | NP_035495    |
| Mouse | Tiam1-PH1         | -36.0 | NP_033410    |
| Mouse | Kalrn-PH1         | -36.0 | XP_998128    |
| Mouse | Centd2-PH4        | -38.2 | NP_001035201 |
| Mouse | Grb7-PH1          | -39.0 | NP_034476    |
| Mouse | Arhgef7-PH1       | -41.2 | NP_059098    |
| Mouse | ARHGEF3-PH1       | -41.5 | NM_027871    |
| Mouse | Tiam2-PH1         | -41.6 | NP_036008    |
| Mouse | Grb14-PH1         | -41.8 | NP_057928    |
| Mouse | Mcf2-PH1          | -42.6 | NP_573460    |
| Mouse | Arhgef18-PH1      | -42.9 | NP_598723    |
| Mouse | RASGRF1A-PH2      | -43.2 | NM_011245    |
| Mouse | ARHGEF2-PH1       | -44.3 | NM_008487    |
| Mouse | VAV2-PH1B         | -45.3 | NP_033526    |
| Mouse | ROCK1-PH1         | -45.7 | NP_033097    |
| Mouse | Fgd1-PH1          | -46.9 | NP_032027    |
| Mouse | Mcf2l-PH1         | -48.4 | NP_835177    |
| Mouse | Vav3-PH1          | -49.1 | NP_065251    |
| Mouse | Vav1-PH1          | -51.3 | NP_035821    |

|                     |                        |       |           |
|---------------------|------------------------|-------|-----------|
| <b>Mouse</b>        | Grb10-PH1              | -51.6 | NP_034475 |
| <b>Mouse</b>        | Sos2-PH1               | -53.4 | XP_992919 |
| <b>Mouse</b>        | Akap13-PH1             | -55.4 | XP_984499 |
| <b>Mouse</b>        | Sos1-PH1               | -55.9 | NP_033257 |
| <b>Mouse</b>        | RGNEF-PH1              | -58.3 | NM_012026 |
| <b>S.Cerevisiae</b> | SLM2-PH1               | 14.2  | NP_014351 |
| <b>S.Cerevisiae</b> | BOI1-PH1               | 5.0   | NP_009468 |
| <b>S.Cerevisiae</b> | BUD4-PH1               | -2.7  | NP_012625 |
| <b>S.Cerevisiae</b> | ATG26-PH1              | -12.1 | NP_013290 |
| <b>S.Pombe</b>      | csx2-PH1               | 3.0   | NP_595897 |
| <b>S.Pombe</b>      | SPAC26A3.10-PH1        | 0.2   | NP_594153 |
| <b>S.Pombe</b>      | ksg1-PH1               | -3.1  | NP_588442 |
| <b>S.Pombe</b>      | SPAC11E3.11c-PH1       | -5.8  | NP_594936 |
| <b>S.Pombe</b>      | reserved_name_rga2-PH1 | -7.7  | NP_594152 |
| <b>S.Pombe</b>      | SPCPB16A4.02c-PH1      | -11.2 | NP_588026 |
| <b>S.Pombe</b>      | SPAPYUG7.03c-PH1       | -21.1 | NP_594704 |

transfected and imaged and number of those cells expressing the phenotype (tran

| Translocating (T),<br>constitutively-PM<br>localized (P), or cytosolic (C) | Total<br>transfected | # of cells<br>non-PM | # of cells<br>PM prelocalized |
|----------------------------------------------------------------------------|----------------------|----------------------|-------------------------------|
| T                                                                          | 17                   |                      |                               |
| T                                                                          | 5                    |                      |                               |
| C                                                                          | 41                   | 41                   |                               |
| P                                                                          | 6                    |                      | 6                             |
| C                                                                          | 13                   | 13                   |                               |
| C                                                                          | 11                   | 11                   |                               |
| T                                                                          | 20                   |                      |                               |
| T                                                                          | 7                    |                      |                               |
| T                                                                          | 11                   |                      |                               |
| T                                                                          | 5                    |                      |                               |
| P                                                                          | 17                   |                      | 17                            |
| C                                                                          | 9                    | 9                    |                               |
| T                                                                          | 14                   |                      |                               |
| T                                                                          | 9                    |                      |                               |
| T                                                                          | 15                   |                      |                               |
| T                                                                          | 15                   |                      |                               |
| T                                                                          | 21                   |                      |                               |
| C                                                                          | 22                   | 22                   |                               |
| C                                                                          | 21                   | 21                   |                               |
| T                                                                          | 19                   |                      |                               |
| C                                                                          | 22                   | 22                   |                               |
| C                                                                          | 17                   | 17                   |                               |
| C                                                                          | 10                   | 10                   |                               |
| C                                                                          | 24                   | 24                   |                               |
| T                                                                          | 8                    |                      |                               |
| T                                                                          | 14                   |                      |                               |
| T                                                                          | 23                   |                      |                               |
| T                                                                          | 21                   |                      |                               |
| T                                                                          | 42                   |                      |                               |
| T                                                                          | 32                   |                      |                               |
| T                                                                          | 9                    |                      |                               |
| T                                                                          | 10                   |                      |                               |
| T                                                                          | 9                    |                      |                               |
| T                                                                          | 17                   |                      |                               |
| T                                                                          | 13                   |                      |                               |
| T                                                                          | 11                   |                      |                               |
| T                                                                          | 8                    |                      |                               |
| T                                                                          | 16                   |                      |                               |
| T                                                                          | 35                   |                      |                               |
| T                                                                          | 21                   |                      |                               |
| T                                                                          | 17                   |                      |                               |
| T                                                                          | 16                   |                      |                               |
| T                                                                          | 16                   |                      |                               |
| T                                                                          | 14                   |                      |                               |





|  |   |    |    |    |
|--|---|----|----|----|
|  | C | 6  | 6  |    |
|  | C | 5  | 5  |    |
|  | T | 18 |    |    |
|  | C | 16 | 16 |    |
|  | C | 8  | 8  |    |
|  | C | 25 | 25 |    |
|  | C | 11 | 11 |    |
|  | C | 12 | 12 |    |
|  | C | 8  | 8  |    |
|  | C | 8  | 8  |    |
|  | C | 18 | 18 |    |
|  | P | 12 |    | 12 |
|  | C | 13 | 13 |    |
|  | C | 11 | 11 |    |
|  | C | 13 | 13 |    |
|  | C | 15 | 15 |    |

islocating, PM-loc

| # of cells<br>PM translocated |
|-------------------------------|
| 17                            |
| 5                             |
| 20                            |
| 7                             |
| 11                            |
| 5                             |
| 13                            |
| 9                             |
| 11                            |
| 12                            |
| 13                            |
| 6                             |
| 6                             |
| 10                            |
| 23                            |
| 21                            |
| 40                            |
| 30                            |
| 9                             |
| 6                             |
| 8                             |
| 12                            |
| 8                             |
| 11                            |
| 8                             |
| 7                             |
| 32                            |
| 13                            |
| 7                             |
| 16                            |
| 5                             |
| 9                             |



14  
15  
15  
11  
27  
7  
7  
7

5

|

|

17

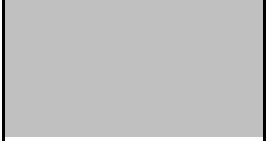

alized or cytosolic)

**Sequence**

IVIESWLHKKG.....eHIRNWRPRYFILFR.....dGTLLGFRSKP.....kEDQPLPEPLNNF..MIRDAATV.....(V  
VVEGWLHKKG.....eHIRNWRPRYFMIFN.....dGALLGFRAKP.....kEQPFPEPLNDF..MIKDAATM.....(V  
AEREGWLFKQSSnplfsGALSWKKRWFVLSE.....NCLYYFDQMT.....dKEPKGIITLANV..GIRKVEAP.....(V  
VEKAGWLNKWT.....nYLKGYRQRWFVLDS.....nATLSYYRNPSS.....evgHTCRGSINLQEA..RVHTDKT-.....(V  
RTFCDVCNKKL.....-----SDI-.....IRPTPAFECKNC..HFKTHKDH.....VAQGSPLMCI  
GRMNGWLRVYR...ddmTGSTWIASWAMMDL.....TRISFYTNDG.....adIEKPFIDSIDLNKE..QWVLRGTGQ.....(V  
PDKEGWLWKQG.....gRYKSWKRRWFILND.....NCLYYFEYTT.....dKEPRGIIPLENI..SVREIHDR.....(V  
VVKEGWLMKRG.....eHIKNWRQRYFVLHS.....dGRLMGYRSKPadsastpsDFLLNNFTVRGC..QIMTVDRP.....(V  
VVKSGSMVKRAqknkrfTPVNYKHRWFELTK.....RTFSYFDVEN.....verRRERGRHILKGV..rLVEEATVS.....(V  
VTLSGWLHKQG.....sdGLKVWRKRWFLAE.....YCLYYYKGPE.....eEKLLGSVLLPSY..RVSACLPE.....(V  
HSCRGYLHKLK.....aTFHAWSRWFVLDL.....qrSALIYYSDKS.....eRKPRGGAYFATI.dEVYLDHLN.....(V  
IKHHGHLNKKSS.....dKTTKWKQLYFALIN...dgseTQLCFYDNPK.....kTKPKGLIDLSCA..YLQCHDS.....(V  
PDREGWLLKLG.....gRVKTKWRRWFILTD.....NCLYYFEFTT.....dKEPRGIIPLENI..SVQKVDLP.....(V  
CCCRGPLVKMG.....gRIKTWRKRWFCFDR.....qaRRLAYYADKE.....eTKLKGVIYFQAI.eEVYYDHLR.....(V  
KTCRGFLIKMG.....gKIKTWKKRWFVDR.....nkRTFSYADKH.....eTKLKGVIYFQAI.eEVYYDHLK.....(V  
AVCTGWLVKSP..perkiQRYAWKRWFLRRgrmsgnpDVLEYYRNKH.....sSKPIRVIDLSEC..AVWKHVGP.....(V  
DKHEGFMLKKR...kwPLKGWHKRFFVLND.....GMLKYSKAPL...diqkGKVHGSIDV-GL..SVMSIKK-.....(V  
VLKQGYLWKRK.....hLRRNWAERWFQLQP.....SCLCYFGSEE.....cKEKRGIIPLDAH.cCVEVLPDR.....(V  
IVKKGYLLKKG.....KGKRWNLYFILEG.....sdAQLIYFESEK.....raTKPKGLIDL SVC..SVYVVHDS.....(V  
RSYEGTLYKKG.....aFMKPWKARWFVLDK...tkHQLRYDHRV.....dTECKGVIDLAEV..EAVAPGTP.....(V  
LEKSGYLLKMG.....sQVKTWKRWFVLRQ.....GQIMYYKSPS.....dviRKPGQVDLNSR.cQIVRGEG-.....(V  
KRYEGPLWKSS.....RFFGWRLFVVLEH.....GVLSWYRKQP...davhniYRQGCKHLTQA..VCTVKST-.....(V  
PIKMGWLKKQR.....sIVKNWQQRYFVLRA.....QQLYYYKDEE.....dTKPQGCMYLPGC..TIKEIATN.....(V  
DTKHGMMKFREllglIPSGGFHDYFILNS.....SCLRYKEVRwsgapetsHRPEKEWPIKSL..KVYLGVKK.....(V  
PDREGWLLKLG.....gRVKTKWRRWFILTD.....NCLYYFEYTT.....dKEPRGIVPLENI..SIREVEDP.....(V  
PDREGWLLKLG.....ggRVKTKWRRWFILTD.....NCLYYFEYTT.....dKEPRGIIPLENI..SIREVDDP.....(V  
IVKEGWLHKKR.....eYIKTWRPRYFLLKN.....dGTFIGYKERP...qdvdrESPLNNFSVAQC..QLMKTERP.....(V  
IVKEGWVQKRG.....eYIKNWRPRYFLLKT.....dGSFIGYKEKP...qdvdiPYPLNNFSVAKC..QLMKTERP.....(V  
VIKEGWLHKKR.....eYIKTWRPRYFLLKS.....dGSFIGYKERP..eapdqtLPLNNFSVAEC..QLMKTERP.....(V  
KVCRGYLIKMG.....gKIKSWKKRWFVDR.....lkRTLSYYVDKH.....eTKLKGVIYFQAI.eEVYYDHLR.....(V  
LLKEGFMIKRAqgrkrfGMKNFKKRWFRILT.....HEFTYQKSKG.....DQPLCNIPLENI.IAVERLEEE.....(V  
TILEEILIKRSqqkkktSPLNYKERLFLTK.....SVLSYYEGRA.....ekKYRKGVIDISKI..KCVEIVKN.....(V  
HLKEGEMKRAqgrtriGKKNFKKRWFLCLTS.....RELTYHRQGG.....KDAIYTIPVKNI.IAVEKLEEG.....(V  
VVCSGWLRKSP..pekkIKRYAWKRRWFVLRsgritgdpDVLEYYKNDH.....aKKPIRIIDLNLc.qQVDAGLTF.....(V  
VILESIFLKRsqkkktSPLNFKKRLFLLTV.....HKLSYYEYDF...ergrrGSKKGSIDVEKI..TCVETVIPeknpqprge  
VVCTGWLRKSP..pekkIRRYAWKKRWFILRSgrmsgdpDVLEYYKNEH.....sKKPLRIIDLNLc.eQVDAGLTF.....(V  
ILLEEQLIKKsqkrrtSPSNFKVRFVLT.....ASLAYFEDRH.....gkkRTLKGSIELSRI..KCVEIVKS.....(V  
VIKAGYCVKQG.....aVMKNWKRRYFQLDE.....NTIGYFKSEL.....eKEPLRVIPLKEV.hKVQECKQS.....(V  
VAKAGYLHKKG...gtqlQLLKWPLRFVIIHK.....RCIYYFKSST.....sASPQGAFSLSGY.nRVMRAAEE.....(V  
PVQKGFLKRR...kwPLKGWHKRFFCLEK.....GILKYAKSQ-.....-ADIEREKLHGC.iDVGLSVMS.....(V  
VLKEGFLVKRG.....hIVHNWKARWFILRQ.....NTLLYYKLEG...grrvTPPKGRIVLDGC..TITCPCLE.....(V  
GTKEGYLTKQG.....gLVKTKWTRWFTLQR.....NELKYFKDQ-.....-MSPEPIRIDL.tECSAVQFD.....(V  
LIKSGYCVKQG.....nVRKSWKRRFFALDD.....FTICYFKCEQ.....dREPLRTIPLKDVikTHECLVKS.....(V  
VVKQGYLSKQG.....hKRKNWVRRFVLRK.....dpAFLHYDPSK.....eeNRPVGGFSLRGS..LVSALEDN.....(V

ERQEGHLLKKR...kwPLKGWHKRYFVLED.....GILHYATTRQ....ditkGKVHGSIDVRLS..VMSINKK-.....  
ILKMGPVDKRK.....-GLFARRRQLLLE.....gPHLYYVDPVN.....KVLKGEIPWSQE.IRPEAKNF-.....  
ALKQGWLHKKGggsstlSRRNWKKRWFVLRQ.....SKLMYFENDS.....eEKLKGTVEVRTA.kEIIDNTS-.....  
RIREGYLVKKG....svFNTWKPMWVVLLE.....DGIEFYKKKS.....dNSPKGMIPLKGS..TLTSPCQD.....  
GDCEGWLWKKK.daksyFSQKWKKYWFVLKD.....ASLYWYINEE.....dEKAEGFISLPEF..KIDRASEC.....  
STMSGYLYRSK.....gSKKPWKHLWVFIKN.....KVLTYAASE.....dVAALESQPLLGF..TVTLVKDE.....  
PYFHSFLYMKG....gLMNSWKRRWCVLKD.....ETFLWFRSKQ.....EALKQGWLHKKG.gGSSTLSRR.....  
IQLSGMYNVRK.gkmqIPVNRWTRRQVILCG.....TCLIVSSVKD.....svSGKMHVPLIGG..KVEEVKK-.....  
IIKQGCLLKQG....hRRKNWKVRKIFILRE....dpAYLHYYDPAG.....gEDPLGAVHLRGC..VVTSVSS.....  
VVRGWLYKQD....stGMKLWKKRWFVLS.....LCLFYRDEK.....eEGILGSILLPSF..QIAMLTAE.....  
PTCRGYLHKRT...hsgFVKGWKRWFVLRK.....dGFLLYYKHRK...degkWPPLDMIKLEGA..EVDIDNSL.....  
FVKSGWLLRQS....tilKRWKNWFVLDLWS.....dGHLYYDDQT....rqsIEDKVHMPVDCI..NIRTGHEC.....  
VLKQGYMMKKG....hKRKNWTERWFVLRK.....NIISYYVSED.....IKDKKGDILLDEN.cCVESLPDK.....  
PEKVGWVRKFC..gkgiFREIWKRYVVLK.....DQLYVSEKEV....kdeKNSQEVFDLSDY.eKCEELRKS.....  
VRKVGYLKPK.....---SMHKRFFVLRaseagpARLEYEENEK..kwrhksSAPKRSIPLESC.fNINKRADS.....  
FIVRGWLHKEVknspkmSSLKLLKRWVFLTH.....NSLDYYKSSE.....knALKLGTLVNLNSL.cSVVPPDEK.....  
IVREGFLLKRKepgglTRFAFKKRYFRLSG.....RDLSYSKTPE.....WQVHTSIPLSCI..RAVEHVDE.....  
VSHSGFLYKTAIldqrrAREEFSSRWCVLGD.....GVLSYFENER.....aVTPNREIRASEI..VCLAVPPP.....  
ILKEGMLTKQN....nSFQRSKRRYFKLRG.....RTLYYAKTAK.....SIIFDEVDLTD..SVAESSTK.....  
VIKAGYLEKRR.kdhsfLGFQWKRWCALSK.....TVFYGGSDK.....dKQKGEFAIDGY..DVRMNNTL.....  
-MEGVLYKWT....nYLTGWQPRWFVLDN.....GILSYDSQD....dvcKGSKGSIKMAVC..EIKVHPA-.....  
LVRGGWLWRQS....sILRRWKRWFVLDLWS.....dGTLGYHDET....aqdEEDRVVIHFVNR..DIKVGQEC.....  
PTIEGYLYTQE...kwaLGISWAKYCRYEK...etrmLTMIPMEQKP.....GAKQGPVDLTLK.yCVRRKTES.....  
ITKEGMLHYKA.stsyIGKEHWKACFVLSN.....GILYQYDRT.....dVIPLLSVNMGGE..QCGGCRRS.....  
PIYGGWLLLAPfdnpvhrSRKWQRRFFILYE.....HGLLRYALDE.....mptTLPQGTINMNQC.tDVVDGEAR.....  
VVMGYLFRKRA....snAFKTWNRRWFISIQN.....SQLVYQKCLK.....dALTVVVDDLRLC..SVKPCEDI.....  
MKHSGYLWTIG....knVWKRWKKRFFVLVQ...vsqytFAMCSYREKK.....AEPQELLQLDGY..TVDYDPO.....  
LHLEGWMKVPR..nnkrGQQGWDRKYIVLEG.....SKVLIYDNE-.....AREAGQRPVEEF..ELCLPDGD.....  
VYKSGFLARKIlgkktprGKRGWKTFYAVLKG.....TVLYLQKDEYkpekalseEDLKNVSVHHA..LASKATDY.....  
-----.....-GEWKKHWFVLT.....SSLKYRDST...aeaaDELDEIDLRSC.tDVTEYAVQ.....-RN'  
IVKQGYVKMKS....rKLIYRRCWLVFRK.ssskqpQRLEKYPDEK....svclRGC PKVTEISNV.kCVTRLPKE.....  
VIRKGWLTINN...igiMKGGKSKEYWFVLT.....ENLSWYKDDE.....eKEKKYMLSVDNL..KLRDVEKG.....  
NRICGFLDIED....neNSGKFLRRYFILD.....qaNCLLWYMDNP..qnlavgAGAVGSLQLTYI.sKVSIAATPK.....  
AKICAFLLRKK.....RFGQWTKLLCVIKD.....TKLLCYKSSK.....dQQPQMEPLQGC..SITYIPRD.....  
TFLCDFLYQAPissekkLLEETNKKWCVLEG.....GFLSYENDK.....sTTPNGTININEV..ICLAIHKE.....  
PLIEGKLKEKQ..vrwkFIKRWKTRYFTLAG.....NQLLFQKGS.....kdDPDDPPIELSKV..QSVKAVAK.....  
LLGEGVLTKEC.....-RKKAKPRIFFLN.....DILVYGSIVL...skrkYRSQHIIPLLEEV..TLEPLPET.....  
NFKKGWLTQY....EDGQWKKHWFVLDL.....QSLRYRDSV...aeaaADLDGEINLSTC.yDVTEYPVQ.....  
VIRRGWLTINN...isIMKGGKSKEYWFVLT.....ESLSWYKDEE.....eKEKKYMLPLDNL..KIRDVEKG.....  
VTIQGVLRKTKegkptVASRTKYWAALCG.....TQLFYAAKSaterkhfKSTSNKNVSVVGW..MVMMAADDP.....  
AEMAAELGMRG....pkKGSVAKRRLVKLVV.....NFLFYFRPDE.....AEPLGALLERC..RVAQEE--.....  
NQLSGNLLRKF....kNSNGWQKLWVFTN.....FCLFFYKSHQ.....dSHPLASLPLLYG..SLTIPSES.....  
SVICSFLHYME....kGGKGWKAWFVPE...nepLVLYYIYGAPO.....dVKAQRSLPLIGF..EVGPPEAG.....  
VKHIAWLAEQA..kldgGRQQWRPVLMAVTE.....KDLLYDCMP..wtrdawASPCHSYPLVAT..RLVHSGSG.....  
FTAEGYLYVQE.krapFGSSWVKHYCMYRK...takfFNMPFEHRS.....ggkLGDGEAFFLKEC..TKRHMDST.....  
SIKEGILKLEepskilSGNKFQDRCVLRD.....GHLFIYKDPK.....sSKHDKMFPLRAM..KFYLGKVK.....  
FLKEGTLMKLS.....-RKVMQPRMFFLN.....DALLYTTPMQ....sgmYKLNMLSLAGM..KVRKPTQE.....  
VERCGVLSKWT....nYIHGWQDRWVVLKN.....NTLSYKSED.....eteYGCRGSICLSKA..VITPHDF-.....  
LLKQGELQQMstsrtilTKKLFREIYFLFN.....DLLVICRQIP....gdkYQVFD SAPRGLL..RVEELEDQ.....  
LMQEGTMMRKV....rTKSWKKLRYFRLQN.....DGMTVWHGSQ.....peSMPKPTFSISDV.eRIRKGQDS.....  
TYKHGVLTRKTgkrtpRGRGWKKFYAVLKG.....TILYKDEYridkalseGDLKNAIRVHHA..LATRASDY.....

PELEGALYLKE.....dGKKS WKRRYFLLRA.....SGIYVVPKKGK...tktsRDLACFIQFENV..NIYYGIQC.....ki  
SEKKGFLLKKS....dgIRKVVQRRKCAVKN.....GILTISHATS.....NRQPAKLNLLTC..QVKPNAE-.....  
VMKEGWMVHYT....sKDTLRKRHYWRLDS.....KCITLFQNDT.....gSRYYEIPLSEI.ICLEPAKPS.....a  
KGLEGVIRKRSfcgrdqVCYRWSKRWL VVKD.....SFLLYMRPET.....gaISFVQLFD-PGF..EVQVGKRS.....  
GTRKGYLSKRS....aDNPKWQTKWFALLQ.....NLLFYFESDS.....sPRPSGLYLLEGS..ICKRAPSP.....krgtsske  
PECLGLLHQLLE....rSTDVWIQH YCILKD.....GCLYFYASIR.....sTQASGGLYLQGY..SVSEQTHG.....  
LLKGSQLLKVK.....SSSWRRERFYKLQE.....DCKTIWQESR...kvmrSPESQLFSIEDI.qEVRMGHRT.....e  
VIMADSLKIRG.....TLKSWTKLWCVLKP.....GVLLIYKTPK.....vQWVGTVLLHCC..ELIERPSK.....  
LVKDGFLVEVS.....-ESSRKL RHVFLFT.....DVLLCAKLLKhpfdhelEDMKMKISALKS..EIQKEKAN...kqgsraierlkk  
SMVEGSELKKV....rSNSRIYHRYFLLDA....dmQSLRWEP SKK.....DSEKAKIDIKSI.kEVRTGKNT.....difrs  
GTRKGFLSKKA....aEASRWHEKWFALYQ.....NVL FYFEQE Q.....sGRPAGMYLLEGC..SCERTPAP.....prl  
DLSMGDLLLHTpaslgkW KKEPELAA FVFKT.....AVVLVYKDG SsiyeewdpFRFRHMIPTEAL..QVRALPSA.....  
FLHSGKLYKAK.....--SNKELYGFLFN.....DFLLLTQITKspksnlqyKMYKTPIFLNEV..LVKLPTDP.....  
CIVHGYMSKMG....npFLTQWQRRYFYLFP.....NRLEWRGEG-.....EAPQSLLTMEEI..QSVEETQI.....  
AVMEGPLFLQS...qrfGTRRWRKTWAVLYP..asphgvARLEFFDHKGrggrggsrRLDCKMIRLAEC.vSVVPVTV E.....  
IQREGALRFMVaaspggGTAQWQKCRLLLR.avagerFRLEFFVPPK.....aSRPKVSIPLSAI.iEVRTT MPL.....  
IKQIGWLTEQL....PSGGTAPT LALLTE.....KELLYFCSLP..qsrealSRPRTAPLIAT.sSAHRLVHS.....gpsl  
LLREGPVLKIS....fRRSDPMERYLVLFN.....NMLLYCVPRV..lqvgaqFQVRTRIDVAGM..KVREL TDA.....  
PVKEGPLFIHRkkgkplASSSFKKLYFSLTT.....EALSAKTSS....skkSTFIKLASIRAA.eKVEEK SFG.....  
KGLEGMIMKRSccghgrACYRWSKRWLIVKD.....SFLLYMKPDS.....GAIAFVLLVDKE.fRVKVG RKE.....  
AQMEGFLNRKHahnkkaSSRSWHNVYCVINN.....QEMGFYKDAK.saasgipYHSEVPVSLKEA..ICEVALDY.....  
LLCHGELKNKS.....---GHKLYIFLFQ.....DILVLRPVT..rnerhlyQVYRQPIPVQEL..VLEDLQDG.....dvrmmggsfr  
VSKKGYLHFLE....pHTAGWAKRFV VVRR.....PYAYMYNSDK.....dTVERFVLNLSTA..QVEYSEDQ.....  
IQRELLSFMGltsgggGQPQWQKCRLLLRSegeggggSRLEFFVPPK.....aSRPRLSIPCSTI.tDVRTATAL.....  
LMKLGTVARRG.....AMGIWKEFFCELSP...leFRLYLSDEE-.....RTCVECSLLRC..EAVGPAH-.....  
IRHLGWLAEKV...pgeSEKQWKPALVVLTE.....KDLLIYDSMP..rrkeawFSPVHSYPLLAT..RLVHSGPG.....  
IVKQGYVRIRS....rRLGIYQRCWL VFKK.asskqpKRLEKFS DER.....aayFRCYHKVELNNV.kNVARLPKS.....  
FIRLGSLSKLS.....-GKGLQQRMF LFN.....DVLLYTSRGL...tasnqFKVH GQLPLYGM..TIEESEE.....  
RGFEGKLT AQGpeaggILSSRGRERRVFLFE.....QIIIFSEALGgrggaqpgYVYKNSIKVSCL..GLEGNLQG.....  
LIKEGSIQKLS....aKNGTTQDRHLFLFN.....NVMLYCVPKL..rlmgqkLSVREKMDISDL..QVQDIVKP.....  
PELADYIKVFK..pkITLKG YKYWCTFKD.....TSISCYKSKE....essGTPAHQMNL RGC..EVT PDVNI.....  
VSKKGYLHFKE....pLSSN WAKHFV VVRR.....PYVFIYNSDK.....dPVERGIINLSTA..QVEYSEDQ.....  
LLHSGKLYKTK.....--SNKELHAF LFN.....DFLLLTYLVRnskssaqfRMYKTPIFLNEV..LVKLPTDP.....  
VRKAGALAVKNkvesaTRRKWKHYWVSLKG.....CTLFFYETDG.rsgidhnSVPKHAVVWENS..IVQAVPEH.....  
LILQDAFQVWD...pksLIRKGRERHLFLFE.....ISLVFSKEIK.dssgthkYVYKNKLLTSEL..GVTEHVEG.....  
DTKHGMMKFREllglgIPSGGFHD RYFILNS.....SCLRLYKEVR.....sHRPEKEWPVKSL..KVYLG VVK.....  
PEIQGFLQLRG.sgrgsGRKLWKRFFCFLRR.....SGLYYSTKGT...skdpRHLQYVADV NES..NVYVVTQG.....  
VTYMSQVTIQC....aGSEEKNERYLLLFP.....NLLLMLSASP...rmsgFIYQGKLPTTGM..TITKLEDS.....  
YYKERLLYLEEechgelKNNRGVKLHVFLFQ.....EVLVITRAVT.hneqlcyQLYRQPIPVKDL..TLEDLQDG.....evrl  
VRKAGWLFFKPrklelvARRKWKQYWVTLKG.....CTLLFYETYG.knsteqnSAPRCALFAEDS..IVQSVPEH.....  
PEIHGFLHAKE....qGKKS WKKAYFFLRR.....SGLYFSTKGT.....sKEPRHLQLFSEF.sTSHVYMSL.....a  
GHRKGATKMKD....fARFKPMQRHLFLYE.....KAVMFCKRRFegadrypsYSFKHCLKMEDV..GITEHVKG.....  
LHLEGALCWKS.....TSGRLKDVLA VLLT.....DVLLLLQEKDqkyvfasvDSKPPVISLQKL..IVREVANE.....  
GTRKGYLSKRS....aDNPKWQTKWFALLQ.....NLLFYFESDS.....sPRPSGLYLLEGS..ICKRAPSP.....krg  
LIHEGCLLWKT.....ATGRFKDVL LLLMT.....DVLVFLQEKD.qkyiftsLDKPSVVS LQNL..IVRDIANQ.....  
PKIDGELK VRS....iVNHTKQDRYLF LFD.....KVIVVCKRKG.....ysYELKEVIELLFH..KMTDDPMH.....nkdi  
SRIEGWLSVPN..rgniKRYGWKKQYVVVSS.....KKILFYNDEQ...dkeqSNPSMVL DIDKL.fHVRPV TQG.....  
LIKEGHILKLS....aKNGTTQDRYLILFN.....DRLLYCVPRL..rlggkFSVRARIDVDGM..ELKESSNL.....  
LLMQGSFSVWTfkykelARFKPMQRHLFLHE.....KAVLFCKKREegyekapsYSYKQSLNMTAV..GITENVKG.....  
PQGDGEIRITT....IDKHTKQERHIFLFD.....LAVIVCKRKG.....dnYEMKEIIDLQQY..KIANNPTT.....dke  
PKIDGELKITS....VERRSKTD RYAFLLD.....KALLICKRRG.....dsYDLKASVNLHSF..QVRDDSSG.....e

PEIQGFLQVKE.....vGRKSWKKLYVCLRR.....SGLYYSTKGT...skpRHLQLLADLEES..SIFYLIAG.....|  
FIMEGPLTRIG.....--AKHERHIFLFD.....GLMISCKPNHlpgyssaeYRLKEKFVMRKI..QICDKEDA.....  
LVRDGSVFLKS.....TTGRLKEVQAVLLT.....DILVFLQEKDqkyvfasIDHKSTVISLKKL..IVREVAHE.....  
FIMEGTLTRVG.....---AKHERHIFLFD.....GLMICCKSNHlpgassaeYRLKEKFFMRKV..QINDKDDT.....  
LLHDGLVYWK.....ATGRFKDILALLT.....DVLLFLQEKDqkyifaavDQKPSVISLQKL..IAREVANE.....  
EVKSGFLEKRS.....kFLKSYSRGFYVLT.....SFLHEFKTPD....khkfSTPLMSIPLVEC..TVTEHSKK.....t  
ADCSGWMSKKG....tgAMGTWKQRFFTLHG.....TRLSYFTNTN.....dEKERGLIDITAH..RVLPASDD.....drli  
IYKEGYLLQDG....gdLKGKIENRFFKLHG.....SQLSGYHEI-.....-SRKAKIDINLL..KVTKVLRN.....ediqadnggq  
VKMSGNLNIRT.....KLIRSTRYWCVLKN.....HLFSMYTSST.....eIYFPVLTIDLREV.qKIETQKHT.....lr  
SAKQGLLLAFSsdlqvGKSGWHKYWVLDH.....GKICEYANWK.....qsIELHTEPIDLLMA..TVRPAQSV.....  
IFKEGLLLVFGtdlamvSKAAWHKHVIVVEN.....GSLWEYANWK.....dsvKSNVSSISLKHA..SADKVRKQ.....  
ISKIGTLNVYSfrffssLFRKRKPRTFILTN.....fgRYLCVASDGE.....grKTVKEEPIKSV..GMRCRMVK.....  
YIKQGILKFQSeshkfrKKEVWSTVLAVLQR.....DVFTLYNLNTsydpkldISKVGKPKVIKTT..IIASLAKP.....fpss  
AQKEGVLLKYI.....ENGLVSRFYFLKD.....NILYFAENRN.....SPVLGTIHLKDA..QVNRYNAN.....lpifsiidpph  
VLKSGWLIKKG....hATSTKKQLWAVLRR.....DQLSFYKDE-.....-----KDI.sAVAYYKEK.....-SPI  
LLCDGYLCQQG....gDCPYWRRRYFQLIG.....SKLVAFQQFS.....KVRRTIDLSEA.thIVDDNHY.....sde

cldkPRPNMFIVRCIQW.....ttvIERTFYADSADFRQMWIEAIQAVSS  
...lfekPRPNMFMVRCIQW.....ttvIERTFYAESAEVRQRWIHAIESISK  
.....SRPFMFEIFSISD.....gqikackteqdgrlvegrhSIYKICAVNDEDMRSWINAISRMMMA  
.....--TSCIVISGqSQ.....-TFHVKPQNEMDRQQWTSNSLEYMRH  
RyNT.....glsRELVLMAPQTDNCNKWVSQLRRFIE  
...empvdcddsmRANNVLMIKMpRR.....-CLYILAPSQPSARRWAECQLTAQR  
....SKPHCFELFAtGG.....adiikacktdsegkvvegkhTVYRMSAATEEDQQEWIKRLTQSIG  
.....-KPFTFIIRGIQW.....ttvIERTFAVESELERQQWTEAIRNVSS  
...geggdpfaPDGYPFQVGYcElsasanshqlengngggsgvgiegqqsgravpqYTLVIANSEKERSEWIRAIRQVCE  
.....dkiYRKFAFKCEHqNM.....RTYWLAADNSEAMMQWVRALAAASL  
...asksgRPHCTFIVKTKKR.....-SYNLQAASDSAARIWIDAITGAQ  
....lwERPFCFQIVeRAL.....pclaTVTYLCAPSQESYVEWINSLKAQCD  
....KKPFCLELYNpSC.....rgqkikacktdggrvvegkhESYRISATSAEERDQWIESIRASIT  
...cafksNPRLTFCVKTyER.....-LFYMVAPSPEAMRIWMDVIVTAAD  
nankspNPLLTFSVKThDR.....-IYYMVAPSPEAMRIWMDVIVTGAE  
.....sfvrkefQNNFVIVKtSR.....-TFYLVAKTEQEMQVWVHSISQVCN  
.....-KARRIDLDTeEH.....-IYHLKVKSQDWFDWVSKLRHHRL  
.....dGKRCMFCVKTaNR.....-TYEMSASDTRQRQEWTAAIQMAIR  
..lfGRPNCfQIVVqHF.....seehYIFYFAGETPEQAEDWMKGLQAFcN  
..tmgapktvDEKAFFDVKTtRR.....-VYNFCAQDVPSAQWVVDRIQSCLS  
.....-SQTFQLISeKK.....-TYYLTAADSPSLLEEWIRVLQSLK  
.....-DSCLFFIKCfDD.....tiHGFRVPKNSLQSREDWLEAIEEHSA  
...peeAGKFVFEIIPaSW.....dqnrmgqDSYVLMASSQAEMEEWVKFLRRVAG  
.....klrpPTCWGFTVVHeTE.....khekQQWYLCCDTQMELEWRFATFLVQh  
....RKPNCFELYNpSH.....kgqvikackteadgrvvegghVVYRISAPSPEEKEEWMKSIKASIS  
....RKPNCFELYIpNN.....kgqlikackteadgrvvegghMVYRISAPTQEEKDEWIKSIQAAYS  
.....-RPNTFIIRCIQW.....ttvIERTFHVETPEEREWATAIQTVAD  
.....-KPNTFIIRCIQW.....ttvIERTFHVDTPEREWTEAIQAVAD  
.....-RPNTFVIRCIQW.....ttvIERTFHVDSPDEREEWMRAIQMVAN  
saakspNPALTFCVKTThDR.....-LYYMVAPSAAEMRIWMDVIVTGAE  
...sfRMKNMFQVIQpER.....-ALYIQANNCVEAKDWIDILTKVSQ  
vipcQNKFQVHdAN.....-TLYIFAPSPQSRDRWVKLKEEIK  
...sfNKKNMFQVIHtEK.....-TLYIQANNCVEANEWIDVLCRVSR  
.....nkkefENSYIFDINTiDR.....-IFYLVADSEEDMNKWWRCICDICG  
æesemeqisiieRFPYPFQVVYdEG.....-PLYVFSPTTELKRPWIHQKKNVIR  
.....nkkelQDSFVFDIKTsER.....-TFYLVAEETADMNKWVQSICQICG  
ipcHYKYPFQVHdNY.....-LLYVFAPDCESRQRWVLTKEETR  
...dimMRDNLFEIVTtSR.....-TFYVQADSPEEMHSHWIKAVSGAIV  
...ttsNNVFPFKIIHiSK.....khRTWFFSASSEDERKSWMALLRREIG  
...vkKSSKCIDLDTeEH.....-IYHLKVKSEELFDEWVSKLRHHRM  
..yeNRPLLIKLTTrTS.....TEYFLEACSREERDSWAFEITGAIH  
ysqERVNCFCLVfFR.....-TFYLCaKTGVEADEWIKLRWKLs  
.gdllMRDNLFEIITtSR.....-TFYVQADSPEDMHSWIEGIGAAVQ  
...gvptgvkgnVQGNLFKVIKtDD.....THYYIQASSKAERAEWIEAIKKL-T



.....-AQRIDLDTeDN.....-IYHLKIKSQDLFHSWVAQLRAHRL  
..--KTFVHTpNR.....-TYYLMDPSG-NAHKWCRKIQEVWR  
.....-KENGIDIIaDR.....-TFHLIAESPEDASQWFSVLSQVHS  
...fgKRMFVLKITTtKQ.....QDHHFQAAFLEERDAWVRDIKKAIK  
.....RKKYAFKACHpKI.....KSFYFAAEHLDDMNRWLNRLNMLTA  
...nSESKVFQLLHkGM.....VFYVFKADDAHSTQRWIDAFQEGTV  
.....NWKKRWFVLRqSK.....-LMYFENDSE-----EKLKGTVE  
.....-HQHCLAFSSsGP.....qsQTYIICFDTFTEYLRWLRQVSKVAS  
..hdvksDEENLFEITaDE.....VHYLQAATSKERTEWIKAIQVASR  
...dhiNRKYAFKAAHpNM.....RTYYFCTDTGKEMELWMKAMLDAAAL  
.....GKPFVFNCPqSG.....sRILCLCATSNQEMKRWLEAMQRAAR  
diqppdgkPRDCLLQIVCrDG.....KTISLCAESTDDCLAWKFTLQDSRT  
.....dGKKCLFLIKcFDK.....-TFEISASDKKKKQEWIQAISTIH  
.....ksrskKNHSKFTLARcRQ.....pgttaPNLIFLAVSPEEKESWINALSSAIT  
.....KNKHLVALYTrDE.....-HFAIAADSEAEQDSWYQALLQLHN  
.....ifKETGYWNVTVyGR.....kHCYRLYTKLLNEATRWSIAIQNVTD  
..gafQLPHVMQVVTqDG.....agtsHTTYLQCKNVNDLNQWLSALRKASA  
...dthGFEHTFEVYTeGE.....RLYLFGLESAEQAHEWVKCIAKAFV  
..NVNNSFTVITpCR.....-KLILCADNRKEMEDWIAALKTVQN  
.....rkdgKKDCCFEICApDK.....RIYQFTAASPKDAEEWVQQLKFILQ  
.....-DNTRMELIIPGE.....QHFYMKAVNAERQRWLVALGSSKA  
...qdvqppegrSRDGLLTVNLrEG.....SRLHLCAETRDDAIWKTALMEANS  
.....iDKRFCFDIETnER.....pGTITLQAPSEANRRLWMEAMDGKEP  
.....nttDRPHAFQVILaDR.....PCLELSADSEAMADWMQHLCQAVS  
.....tGQKFSLCILTpDK.....-EHFIRAETKEIISGWLEMLMVYPR  
.....ERRFCFEVVSPTK.....-SCMLQADSEKLRQAWVQAVQASIA  
.....pglegGRAFFNAVKEgD-.....-TVIFASDDEQDRILWVQAMYRATG  
avgaselantakaDVPYILKMESHpH.....ttcwpgrTLYLLAPSPDKQRWVTALESVVA  
.....eKKNVFKLKTaDW.....RVLLFQTQSPEEMQGWINKINCVAA  
YGFQIHTkDA.....-VYTLSAMTSGIRRNWIEALRKTVR  
.....tKRQAVAIIFTdDS.....-ARTFTCDSELEAEWYKTLVSVECL  
.....fmSSKHIFALFNtEQ.....rnvykdyRQLELACETQEEVDSWKASFLRAGV  
.....qkpKTPFCFVINAISQ.....-RYFLQANDQKDLKDWEALNQASK  
skKKKHELKITQqGT.....DPLVLAVQSKEQAEQWLKVIKEAYS  
fyIntGPIFIFEIYLpSE.....RVFLFGAETSQAQRKWTEAIAKHfV  
..krrdrSLPRAFEIFTdSK.....-TYVFKAKDEKNAEELWQCINVALA  
AKNRWMIKtAKK.....-SFVSAASTTERQEWISHIEECVR  
.....-RNYGFQIHTKEG.....-EFTLSAMTSGIRRNWIQTIMKHVL  
...fmSNKHVFAIFNtEQ.....rnvykdIRQIELACDSQEDVDSWKASFLRAGV  
.....EHPDLFLLTDsEK.....gNSYKFQAGSRMNAMLWLKHLSAACQ  
.....-PGGFSSISfVED.....IsRKYHFECSSQEQCQDWMEALQRASY  
...eniHKDYVFKLHFkSH.....-VYYFRAESEYTFERWMEVIRSATS  
.....erpDRRHVFKITQsHL.....-SWYFSPETEELQRRWMAVLGRAGR  
.....crspslGSDLTFATRTgSR.....qgiEMHLFRVETHRDLSTWTRILVQGCH  
.....DRRFCFDIEAaDR.....pgVPLTVQAFSEEERKQWLEALGGKEA  
.....-KMKPpTR.....  
.....AYQNELKIESvER.....-SFILSASSAAERDDWLEAISSSIE  
.....-DECRFDISVnDS.....-VWYLRAQDPEHRQQWVDAIEQHKT  
..ggTLANVFILRLIEN.....adreATYMLKASSQSEMKRWMTSLAPNRR  
..ellrylveefPLEQGFTVVFhGR.....rPNLDLVANSVEEAQIWMRGLQLLVD  
.....sKKS NVLKLKTaDW.....RVFLFQAPSKEEMLSWILRINLVAA

mkykaPTDHCFLKHpQI.....qkesqYIKYLCCDDARTLSQWVMGIRIAKY  
...-DKKSFDLIShNR.....-TYHFQAEDEQDYIAWISVLTNSKE  
ltpvgATPHCFEITTaNV.....vyyvgenvnpssppnNSVLPSGIGPDVARMWEVAIQHALM  
.....tETRYGVRIDTsHR.....-SLILKCSSYRQARWWGQEITELAQ  
:sgekqrhsrsrRRRNVLRRQPtRI.....sKTFRLVAIELTGMT---ATLEVSFS  
...FEQPVIELKPsSE.....efKTFYFCAENKTENQRWIAALKTSIK  
:gkelfardiPEDRCFSIVfkdQ.....rNTLDLIAPSPADVQHWWQGLRKiID  
...KDGFCFKLFHpLD.....qsvwavkgpkgesvgsitqplpsSYLIFRAASESDGRCWLDALALR  
:kmfeneflllnSPTIPFRiHnNG.....KSYLFLSSDYERSEWREAIQKLQK  
:ngiseqiSEDCAFSVIYgEN.....yESLDLVANSADVANIWVTGLRYLIS  
tnagpagardalDKQYYFTVLFgHD.....gqKPLELRCEEEQAGKEWMEAIHQASY  
.....daEANAVCEIVHvKS.....esegrpeRVFHLCCSSPESRKDFLKSvHSILR  
sGDEPIFHISHiDR.....-VYTLRAESINERTAWVQKIKAAASE  
.....KERKCLLLKlrGG.....KQFVLQCDSDPELVQWKKELRDAYR  
.....sppePGAAAFRLDTaQR.....-SHLLAADAVSSTA-WVQTLCRTAF  
.....empEKDNTFVLKVeNG.....AEYILETIDSLQKHSWVADIQGCVD  
kgsypyDAELSFALRTgTR.....hgvDTHLFSVESPELAAWTRQLVDGCH  
.....EFPHSFLVSGkQR.....-TLELQARSRDEMVSWMQACQAAID  
.....-SSHIMQVIYaDD.....vgraQTVYLQCKCVNELNQWLSALRKAST  
.....tETKYGLRIDNISR.....-TLILKCNSYRHARWWGGAIEEFIR  
.....kKKKHVFKLRLsDG.....NEYLFQAKDDEEMNTWIAISSAIS  
jafgnsdKAKNIFRVRfQDP.....spgHSHTLQANDVFHKQQWFNCIRAAIA  
.....qamIKTPNTFAVCTeHR.....-GILLQANSDKMDHWLYAFNPLLA  
.....empDRENTFVVKVeGP.....SEYILETSDALHVKAWSIDIQECLS  
.....-SDGRFELVFsGK.....-KLALRASSQDEADWLDVRREALQ  
.....kgsppqaGMDLSFATRTgTK.....qgiETHLFRAEISRDLSHWTRSIVQGCH  
.....TKKHAIGIYFnDD.....TSKTFACESDLEADEWCKVLQMECV  
.....wGVPHCLTLRGqRQ.....-SIIVAASSRSEMEKWMEDIQMAID  
.....-NPCRFALTSrGP.....eggiQRYVLQASDPAVSQAWIKQVAQILE  
.....NAACTFIITGrKR.....-SLELQTRTEEEKKEWIKVIQATVE  
.....sGQKFNIKLLIpVA.....egmNEIWLRCDNEKQYAHWMAACRLASK  
:qamvKTPNTFAVCTkHR.....-GVLLQALNDKMDNDWLYAFNPLLA  
sSDEPVFHISHiDR.....-VYTLRTDNINERTAWVQKIKGASE  
.....pKKDFVFCLSNsLG.....DAFLFQTTSQTELENWITAIHSACA  
.....-DPCKFALWSgRT.....pssdNKTVLKASNIETKQEWIKNIREVIQ  
...klrpPTCWGFTVWHeTE.....khekQQWYLCCDTQMELEWRFATFLSVQH  
.....rklygmPTDFGFCVKPnKL.....rngkhGLHIFCSEDEQSRTCWLAAFRLFKY  
...eNHRNAFEISGsMI.....ERILVSCTSQQDLHEWVEHLQKQTK  
ggsIrgafsnneRVKNFFRVSFkNG.....sqsQTHSLQANDTFNKQQWLN CIRQAKE  
.....pKKEHVFLSNsCG.....DVYLFQATSQTDLENWVTAIHSACA  
:gkklkghaPTYGFCLKPNKA.....ggprDLKMLCAEEEQSRTCWVTAIRLLKD  
.....-DNRKFEIRYsEK.....eEIVQAPNVDVKMLWLKEIRKILV  
.....EKAMFLISAsMQ.....gpEMYEMYTSSKEDRNIWMAHIRRAVE  
jtsskesgeKQQHYFTVNFsND.....sqKTLELRTEDAKDCDEWVAIARASY  
...-AKGMFLISSgPP.....EMYEVAASRDRTTWIRVIQQSVR  
kkshgkMWSYGFYLIIHQG.....kQGFQFFCKTEDMKRWMEQFEMAMS  
...dvyraeteEIPKIFQILYaNE.....gocrKDVEMEPVQQAekt---NFQNHKG  
...NMPRTFLVSGkQR.....-SLELQARTEEEKKDWVQAINSTLL  
.....-DTKKFEIWyNAR.....eEVYIIQAPTPEIKAAWVNEIRKVLT  
:nkKWSYGFYLIIHQG.....qNGLEFYCKTKDLKKKWLEQFEMALS  
:rdnkKWSHMFLLIEdQG.....aQGYELFFKTRELKKKWMEQFEMAIS

kkqynaPNEHGMCIKPnKA.....ktemkELRLLCAEDEQIRTCWMTAFRLLY  
.cEYRHAFELVSkDE.....NSVIFAAKSAEEKNNWMAALISLHY  
...-EKGLFLISMgVK.....dpEMVEVHASSREERNSWIQIIQDTIN  
...sEYKHAFEIILkDG.....NSVIFSAKSAEEKNNWMAALISLQY  
...-ERGMFLISAsSA.....gpEMYEIHTNSKEERNWMMRRIQQAVE  
ksnseQGKNKILRTnSN.....glihrgHNWVFKVDSYDDMIEWFGNIKALSS  
islyaaslgKGKYCFKLVpQP.....gskkgltfepRVHYFAVENKSEMKAWSAIKATI  
rnftdwvLFNECFQLVFdDG.....ERITFNAECSEEKSDWYNKLQEVVE  
1gSATKTFKLYTdES.....-TFKFNADSEFSAKSWVNALKKEQF  
.....SRKFCFEVITpQT.....-KRTYQATSKAEMHSWIEAIQYSIS  
.....GRRFCFEVVTpKL.....-KRLYQATSAEEMDSWIEAICEAAK  
...NNEHGWWVETpTK.....-SWSFEDPNG-PASAWVELLDKASS  
edavvksTNSLYFDLETsSQ.....LKLRFAGPSPKDAQGWIDALNYWAA  
eftgeNYQSAFVIQEkQT.....etrtgtaTVHVLLARDVEDQKSWLRILRQVP  
KTFFLYLnEK.....-IIRLIATSNEDEAEWVHVLRRSTTG  
:eelegylYFESGFRIFsNG.....DYIDFYAETVGEKDEWMSTLRQHLG

Type of file: table

Label: Table 8

Filename: mmc14.xls

**Supplementary Table 8, Park et al.****PH-domain constructs expressed in NIH3T3 cells and retested for PDGF-**

|           | <b>Species</b> | <b>Construct</b> | <b>RFC Score</b> | <b>NP_Number</b> |
|-----------|----------------|------------------|------------------|------------------|
| <b>1</b>  | Celegans       | akt-2-PH         | 57.5             | NP_001024612     |
| <b>2</b>  | Celegans       | akt-1-PH         | 47.7             | NP_001023647     |
| <b>3</b>  | Celegans       | sec7-PH          | 36               | NP_498764        |
| <b>4</b>  | Drosophila     | Btk29A-PH        | 42.2             | NP_723369        |
| <b>5</b>  | Drosophila     | CG14366-PH       | 26.9             | NP_650310        |
| <b>6</b>  | Drosophila     | CG5004-PH        | 18.9             | NP_573195        |
| <b>7</b>  | Human          | OSBPL6-PH        | 33.1             | NP_665682        |
| <b>8</b>  | Human          | DEF6-PH          | 18.3             | NP_071330        |
| <b>9</b>  | Human          | RASA1-PH         | 17.9             | NP_002881        |
| <b>10</b> | Human          | SBF1-PH          | 7.7              | NP_002963        |
| <b>12</b> | Mouse          | Plek-PH          | 16               | NP_062422        |
| <b>13</b> | Mouse          | Cnksr2-PH        | 13               | NP_808419        |
| <b>14</b> | Mouse          | Fgd6-PH2         | 8.3              | NP_444302        |
| <b>15</b> | Mouse          | Myo10-PH2        | 8.1              | NP_062345        |
| <b>17</b> | Mouse          | Plekha5-PH       | 2.3              | NP_659169        |
| <b>18</b> | Mouse          | 2610034M16Rik-PH | 2.2              | NP_081277        |
| <b>19</b> | S.Cerevisiae   | SLM2-PH          | 14.2             | NP_014351        |
| <b>20</b> | S.Cerevisiae   | BOI1-PH          | 5                | NP_009468        |
| <b>21</b> | S.Pombe        | csx2-PH          | 3                | NP_595897        |
| <b>22</b> | S.Pombe        | ksg1-PH          | -3.1             | NP_588442        |
