# Supplementary material
Source: PubMed Central journal article supplement (PMC3523718)

Supp. Figure 3. Park et al.

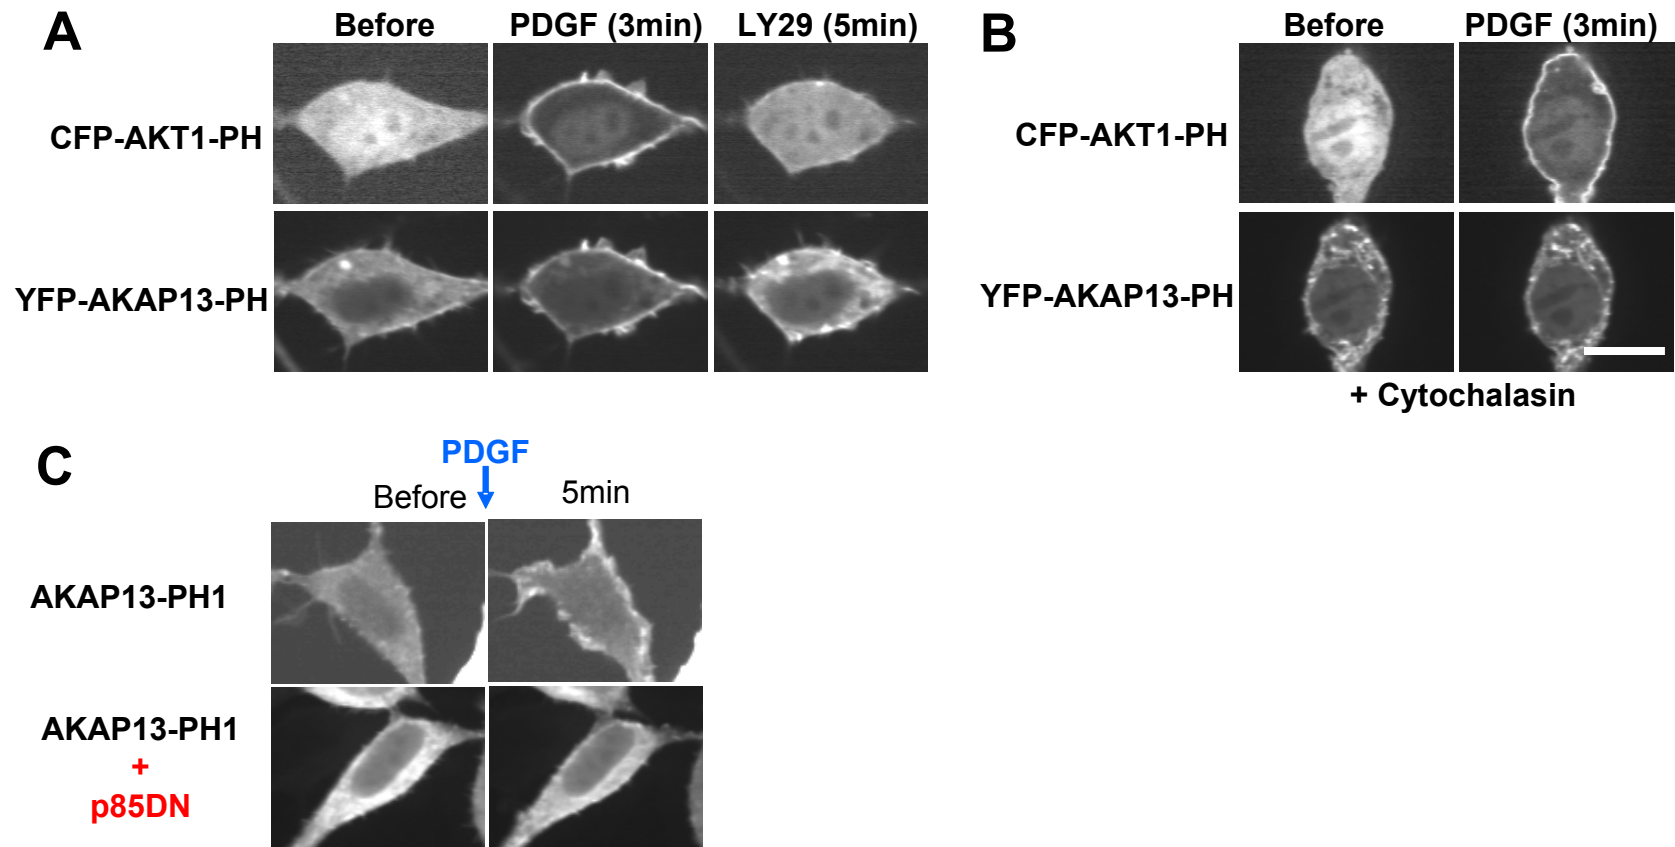

Supp. Figure 4. Park et al.

**A**

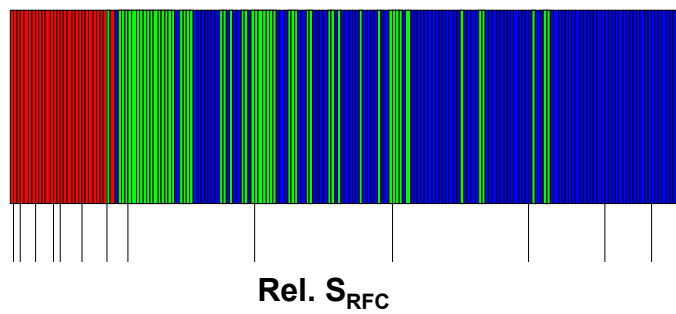

**B**

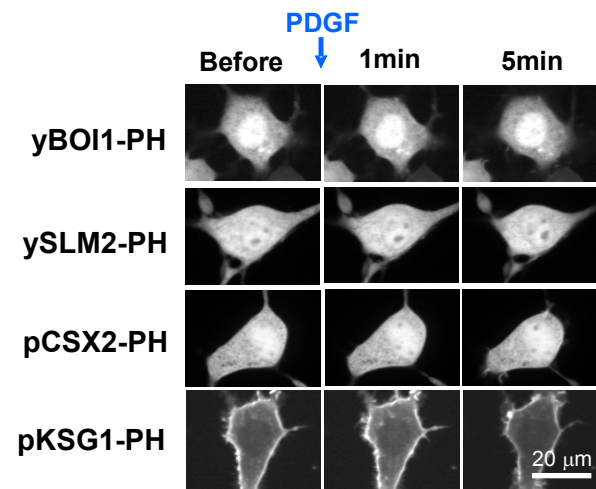

Supp. Figure 5. Park et al.

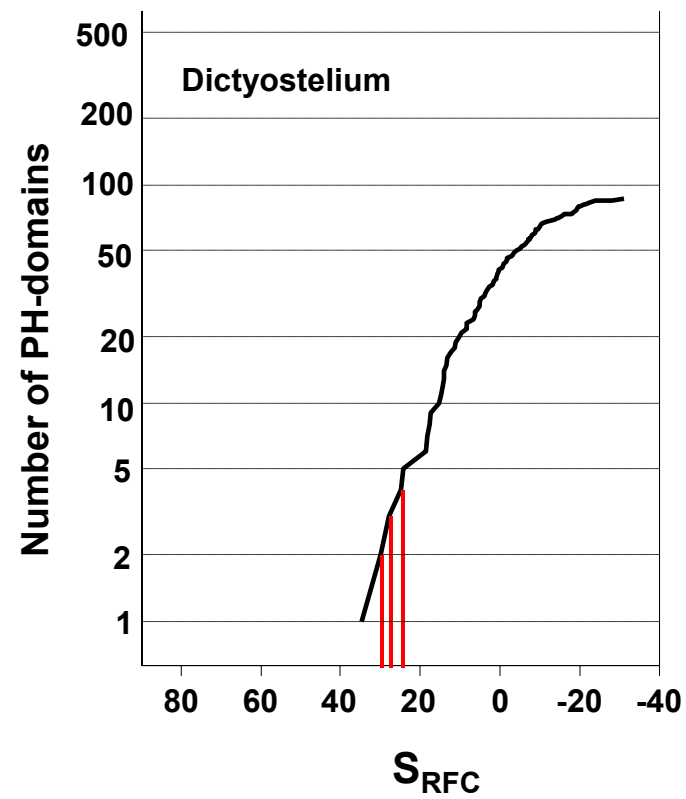

Supplementary Figure 6, Park et al.

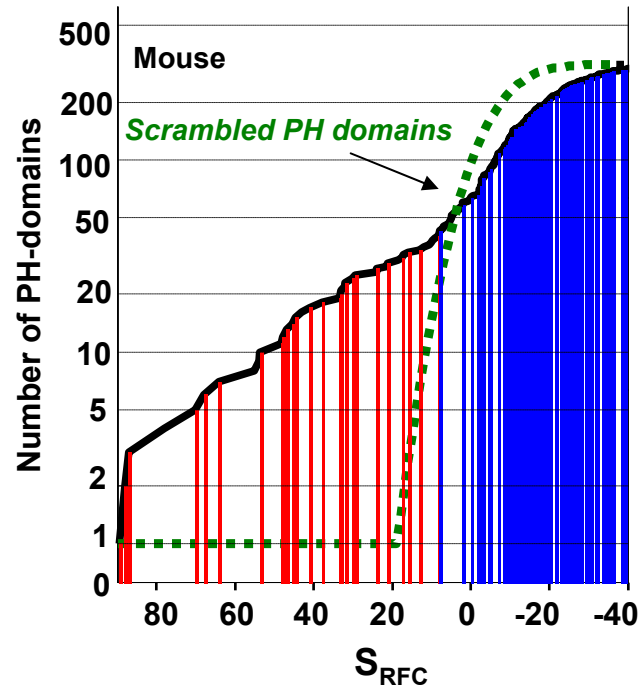

Supplement: NIHMS180892-supplement-Supp_4.pdf [file NIHMS180892-supplement-Supp_4.pdf]
